# Supplementary material
Source: HighWire-hosted journal article supplement (doi:10.1101/rna.080706.125)
Supplement: Supplemental_Tables.xlsx [file Supplemental_Tables.xlsx]

## Sheet: S1. ADC106 miRNA expression
Supplemental Table S1. Differentially expressed miRNAs in ADC106 cells treated with Enoxacin. All significant miRNAs with altered abundance in ADC106 cells treated with 100 µM enoxacin for 72 hours with p<0.05.
Gene_ID	baseMean	log2FoldChange	lfcSE	stat	pvalue	padj	ID	Gene.name	chromosome	Start	End	strand_x000D_
mmu-let-7f-5p	16336.3	3.97837	0.387128	10.2766	8.98184e-25	3.36819e-22	MIMAT0000525	MIMAT0000525	chr13	48537889	48537910	-_x000D_
mmu-let-7f-5p	16336.3	3.97837	0.387128	10.2766	8.98184e-25	3.36819e-22	MIMAT0000525_1	MIMAT0000525	chrX	151912353	151912374	+_x000D_
mmu-miR-21a-5p	139697	3.35273	0.453177	7.39828	1.37964e-13	2.58683e-11	MIMAT0000530	MIMAT0000530	chr11	86584120	86584141	-_x000D_
mmu-miR-872-5p	146.078	4.19619	0.619216	6.77661	1.23028e-11	1.53785e-09	MIMAT0004934	MIMAT0004934	chr4	94665167	94665187	+_x000D_
mmu-miR-140-5p	146.12	3.98463	0.59484	6.69865	2.10352e-11	1.65115e-09	MIMAT0000151	MIMAT0000151	chr8	107551249	107551270	+_x000D_
mmu-miR-221-5p	1080.2	3.43463	0.513245	6.69199	2.20153e-11	1.65115e-09	MIMAT0017060	MIMAT0017060	chrX	19146344	19146369	-_x000D_
mmu-miR-20a-5p	1449.96	3.04115	0.481083	6.32147	2.59083e-10	1.61927e-08	MIMAT0000529	MIMAT0000529	chr14	115044183	115044205	+_x000D_
mmu-miR-9-5p	1581.44	2.76737	0.454556	6.08808	1.14276e-09	6.12193e-08	MIMAT0000142	MIMAT0000142	chr13	83738821	83738843	+_x000D_
mmu-miR-9-5p	1581.44	2.76737	0.454556	6.08808	1.14276e-09	6.12193e-08	MIMAT0000142_1	MIMAT0000142	chr3	88215613	88215635	+_x000D_
mmu-miR-9-5p	1581.44	2.76737	0.454556	6.08808	1.14276e-09	6.12193e-08	MIMAT0000142_2	MIMAT0000142	chr7	79505279	79505301	+_x000D_
mmu-miR-100-5p	6799.98	2.83448	0.478768	5.92037	3.2121e-09	1.50567e-07	MIMAT0000655	MIMAT0000655	chr9	41531437	41531458	+_x000D_
mmu-miR-214-3p	7860.27	-2.349	0.408397	-5.75176	8.83185e-09	3.46579e-07	MIMAT0000661	MIMAT0000661	chr1	162223438	162223459	+_x000D_
mmu-miR-98-5p	206.925	2.85876	0.497689	5.74408	9.24211e-09	3.46579e-07	MIMAT0000545	MIMAT0000545	chrX	151913229	151913250	+_x000D_
mmu-miR-326-3p	110.376	-3.14186	0.551192	-5.70011	1.1973e-08	4.08171e-07	MIMAT0000559	MIMAT0000559	chr7	99552328	99552348	+_x000D_
mmu-let-7g-5p	18811.1	2.30289	0.412342	5.58491	2.33817e-08	7.05492e-07	MIMAT0000121	MIMAT0000121	chr9	106178846	106178867	+_x000D_
mmu-miR-1291	5088.85	-3.26208	0.584906	-5.57709	2.44571e-08	7.05492e-07	MIMAT0031397	MIMAT0031397	chr15	98519828	98519853	-_x000D_
mmu-miR-466f-3p	124.846	-3.06967	0.552801	-5.55294	2.80907e-08	7.5243e-07	MIMAT0004882	MIMAT0004882	chr2	10466998	10467018	+_x000D_
mmu-miR-466f-3p	124.846	-3.06967	0.552801	-5.55294	2.80907e-08	7.5243e-07	MIMAT0004882_1	MIMAT0004882	chr2	10468729	10468749	+_x000D_
mmu-miR-466f-3p	124.846	-3.06967	0.552801	-5.55294	2.80907e-08	7.5243e-07	MIMAT0004882_2	MIMAT0004882	chr2	10472007	10472027	+_x000D_
mmu-miR-145a-3p	233.129	2.77803	0.501845	5.53564	3.101e-08	7.7525e-07	MIMAT0004534	MIMAT0004534	chr18	61647827	61647848	-_x000D_
mmu-miR-99a-5p	6776.57	2.40687	0.439195	5.48019	4.24861e-08	9.95767e-07	MIMAT0000131	MIMAT0000131	chr16	77598940	77598961	+_x000D_
mmu-let-7a-1-3p	236.822	2.80527	0.521021	5.38418	7.27747e-08	1.60532e-06	MIMAT0004620	MIMAT0004620	chr13	48538188	48538209	-_x000D_
mmu-let-7d-3p	3077.66	-2.16259	0.406481	-5.32027	1.03614e-07	2.0861e-06	MIMAT0000384	MIMAT0000384	chr13	48536024	48536045	-_x000D_
mmu-miR-19b-3p	130.301	2.90547	0.546518	5.31634	1.05878e-07	2.0861e-06	MIMAT0000513	MIMAT0000513	chr14	115044358	115044380	+_x000D_
mmu-miR-19b-3p	130.301	2.90547	0.546518	5.31634	1.05878e-07	2.0861e-06	MIMAT0000513_1	MIMAT0000513	chrX	52741991	52742013	-_x000D_
mmu-miR-195a-5p	71.3481	3.54517	0.667979	5.3073	1.11259e-07	2.0861e-06	MIMAT0000225	MIMAT0000225	chr11	70235062	70235082	+_x000D_
mmu-miR-7a-5p	4233.43	2.73314	0.520239	5.25363	1.49129e-07	2.66302e-06	MIMAT0000677	MIMAT0000677	chr13	58392841	58392863	-_x000D_
mmu-miR-7a-5p	4233.43	2.73314	0.520239	5.25363	1.49129e-07	2.66302e-06	MIMAT0000677_1	MIMAT0000677	chr7	78888295	78888317	+_x000D_
mmu-miR-146b-5p	269.042	2.50548	0.481885	5.19933	2.00005e-07	3.40917e-06	MIMAT0003475	MIMAT0003475	chr19	46342790	46342811	+_x000D_
mmu-miR-155-5p	502.19	2.74799	0.538734	5.10082	3.3818e-07	5.30444e-06	MIMAT0000165	MIMAT0000165	chr16	84714143	84714165	+_x000D_
mmu-let-7a-5p	4535.04	1.98176	0.388572	5.10009	3.39484e-07	5.30444e-06	MIMAT0000521	MIMAT0000521	chr13	48538239	48538260	-_x000D_
mmu-let-7a-5p	4535.04	1.98176	0.388572	5.10009	3.39484e-07	5.30444e-06	MIMAT0000521_1	MIMAT0000521	chr9	41536732	41536753	+_x000D_
mmu-miR-199b-3p	9442.02	1.99603	0.415469	4.80429	1.553e-06	2.32949e-05	MIMAT0004667	MIMAT0004667	chr2	32318524	32318545	+_x000D_
mmu-miR-10a-5p	20609.8	2.09587	0.437276	4.79302	1.64289e-06	2.36956e-05	MIMAT0000648	MIMAT0000648	chr11	96317186	96317208	+_x000D_
mmu-miR-26a-2-3p	24.1768	7.57398	1.6602	4.56209	5.06477e-06	7.0344e-05	MIMAT0017058	MIMAT0017058	chr10	126995581	126995602	+_x000D_
mmu-miR-335-5p	54.3913	3.35734	0.749248	4.48095	7.4313e-06	9.95263e-05	MIMAT0000766	MIMAT0000766	chr6	30741314	30741336	+_x000D_
mmu-miR-126a-5p	129.7	2.37495	0.5367	4.42511	9.63953e-06	0.000124649	MIMAT0000137	MIMAT0000137	chr2	26591365	26591385	+_x000D_
mmu-miR-10b-5p	5192.49	2.42031	0.556544	4.34883	1.36869e-05	0.000171086	MIMAT0000208	MIMAT0000208	chr2	74726074	74726096	+_x000D_
mmu-miR-30c-5p	1636.07	1.69712	0.401797	4.22384	2.40176e-05	0.000287197	MIMAT0000514	MIMAT0000514	chr1	23291714	23291736	+_x000D_
mmu-miR-30c-5p	1636.07	1.69712	0.401797	4.22384	2.40176e-05	0.000287197	MIMAT0000514_1	MIMAT0000514	chr4	120769584	120769606	-_x000D_
mmu-miR-374b-5p	661.072	1.76479	0.418267	4.21929	2.45075e-05	0.000287197	NA	NA	NA	NA	NA	NA_x000D_
mmu-miR-1249-3p	242.078	-2.11455	0.508426	-4.15901	3.19625e-05	0.00036321	MIMAT0010560	MIMAT0010560	chr15	84951545	84951566	-_x000D_
mmu-miR-222-3p	5631.25	1.89197	0.458582	4.1257	3.69616e-05	0.000407665	MIMAT0000670	MIMAT0000670	chrX	19146901	19146923	-_x000D_
mmu-miR-10a-3p	157.072	2.12019	0.514932	4.11741	3.83151e-05	0.000410519	MIMAT0004659	MIMAT0004659	chr11	96317227	96317248	+_x000D_
mmu-miR-744-5p	3189.98	-1.60397	0.397119	-4.03901	5.36762e-05	0.000544255	MIMAT0004187	MIMAT0004187	chr11	65734799	65734820	-_x000D_
mmu-miR-22-3p	643.468	1.89483	0.469532	4.03557	5.4469e-05	0.000544255	MIMAT0000531	MIMAT0000531	chr11	75463772	75463793	+_x000D_
mmu-miR-9-3p	36.2424	3.38624	0.839707	4.03265	5.51512e-05	0.000544255	MIMAT0000143	MIMAT0000143	chr13	83738858	83738879	+_x000D_
mmu-miR-9-3p	36.2424	3.38624	0.839707	4.03265	5.51512e-05	0.000544255	MIMAT0000143_1	MIMAT0000143	chr3	88215652	88215673	+_x000D_
mmu-miR-9-3p	36.2424	3.38624	0.839707	4.03265	5.51512e-05	0.000544255	MIMAT0000143_2	MIMAT0000143	chr7	79505318	79505339	+_x000D_
mmu-miR-503-3p	138.971	2.05135	0.509468	4.02645	5.66256e-05	0.000544477	MIMAT0004790	MIMAT0004790	chrX	53053987	53054008	-_x000D_
mmu-miR-17-5p	1850.36	1.95154	0.495389	3.93941	8.16826e-05	0.000765774	MIMAT0000649	MIMAT0000649	chr14	115043684	115043706	+_x000D_
mmu-miR-1957a	55.3244	2.8677	0.732452	3.9152	9.0328e-05	0.000808462	NA	NA	NA	NA	NA	NA_x000D_
mmu-miR-322-3p	642.269	1.70994	0.436809	3.91462	9.05477e-05	0.000808462	MIMAT0000549	MIMAT0000549	chrX	53054269	53054289	-_x000D_
mmu-miR-146a-5p	1948.53	1.56328	0.406985	3.84114	0.000122465	0.00106801	MIMAT0000158	MIMAT0000158	chr11	43374435	43374456	-_x000D_
mmu-miR-1839-5p	308.685	1.86209	0.485802	3.83303	0.000126576	0.00107877	MIMAT0009456	MIMAT0009456	chr7	81529919	81529940	+_x000D_
mmu-miR-6399	86.0581	2.49152	0.657114	3.79161	0.000149673	0.00122965	MIMAT0025151	MIMAT0025151	chr4	138163263	138163284	+_x000D_
mmu-miR-16-5p	538.75	1.57872	0.416987	3.78601	0.000153083	0.00122965	MIMAT0000527	MIMAT0000527	chr14	61631936	61631957	-_x000D_
mmu-miR-16-5p	538.75	1.57872	0.416987	3.78601	0.000153083	0.00122965	MIMAT0000527_1	MIMAT0000527	chr3	69009918	69009939	+_x000D_
mmu-miR-466i-3p	16.7484	-6.5057	1.71911	-3.78434	0.000154117	0.00122965	MIMAT0005834	MIMAT0005834	chr13	17747552	17747573	+_x000D_
mmu-miR-195a-3p	199.288	1.83691	0.488379	3.76124	0.000169071	0.00130574	MIMAT0017000	MIMAT0017000	chr11	70235100	70235121	+_x000D_
mmu-miR-224-5p	134.799	1.93386	0.514465	3.75897	0.000170617	0.00130574	MIMAT0000671	MIMAT0000671	chrX	72261085	72261105	-_x000D_
mmu-miR-362-3p	29.3403	4.07054	1.08468	3.75274	0.000174914	0.00131185	MIMAT0004684	MIMAT0004684	chrX	7241984	7242005	-_x000D_
mmu-miR-425-3p	65.0706	-2.38955	0.643542	-3.71312	0.000204716	0.00150527	MIMAT0001342	MIMAT0001342	chr9	108568830	108568850	+_x000D_
mmu-miR-674-5p	416.38	-1.61356	0.435975	-3.70104	0.000214714	0.00154842	MIMAT0003740	MIMAT0003740	chr2	117185151	117185172	+_x000D_
mmu-miR-6539	841.729	1.49191	0.405195	3.68195	0.000231453	0.00163764	MIMAT0025584	MIMAT0025584	chr14	67859699	67859722	-_x000D_
mmu-miR-3473b	973.676	-1.88051	0.512134	-3.67191	0.000240747	0.00167185	MIMAT0020367	MIMAT0020367	chr10	41670774	41670793	+_x000D_
mmu-miR-28a-3p	351.849	1.73036	0.474861	3.64393	0.000268506	0.00183072	MIMAT0004661	MIMAT0004661	chr16	24827908	24827929	+_x000D_
mmu-miR-8112	59.262	-2.24185	0.616558	-3.63608	0.00027682	0.0018537	MIMAT0031418	MIMAT0031418	chr6	71271745	71271764	+_x000D_
mmu-miR-874-3p	33.9445	-2.76152	0.778426	-3.54756	0.000388812	0.00255798	MIMAT0004853	MIMAT0004853	chr13	58023135	58023156	-_x000D_
mmu-miR-26b-5p	482.154	1.56125	0.447795	3.48652	0.000489341	0.00316385	MIMAT0000534	MIMAT0000534	chr1	74394324	74394344	+_x000D_
mmu-miR-15b-5p	489.185	-1.50315	0.434098	-3.46269	0.000534796	0.00339913	MIMAT0000124	MIMAT0000124	chr3	69009775	69009796	+_x000D_
mmu-miR-6937-5p	32.4381	-3.2589	0.947857	-3.43818	0.000585639	0.00366024	MIMAT0027774	MIMAT0027774	chr12	28679325	28679348	+_x000D_
mmu-miR-5130	38.6141	-2.74569	0.813364	-3.37572	0.000736215	0.00452591	MIMAT0020641	MIMAT0020641	chr14	102982608	102982631	-_x000D_
mmu-miR-374c-3p	50.0596	2.53647	0.759417	3.34002	0.00083773	0.00506691	MIMAT0014954	MIMAT0014954	chrX	103573113	103573131	+_x000D_
mmu-miR-671-3p	448.988	-1.45152	0.440316	-3.29653	0.000978857	0.00582653	MIMAT0004821	MIMAT0004821	chr5	24592171	24592191	+_x000D_
mmu-miR-466h-3p	32.3488	-2.50375	0.770376	-3.25004	0.0011539	0.00676112	MIMAT0017274	MIMAT0017274	chr2	10514940	10514958	+_x000D_
mmu-let-7d-5p	1317.02	1.39238	0.437638	3.18158	0.00146474	0.00845042	MIMAT0000383	MIMAT0000383	chr13	48536078	48536099	-_x000D_
mmu-miR-700-3p	90.0387	-1.91149	0.604405	-3.1626	0.00156367	0.00888451	MIMAT0003490	MIMAT0003490	chr4	135416561	135416581	-_x000D_
mmu-miR-700-5p	52.6064	-2.11041	0.671053	-3.14493	0.00166129	0.00929826	MIMAT0017256	MIMAT0017256	chr4	135416601	135416622	-_x000D_
mmu-miR-2137	129.067	-2.29898	0.741888	-3.09882	0.0019429	0.0107145	MIMAT0011213	MIMAT0011213	chrX	72992113	72992133	+_x000D_
mmu-miR-106b-3p	1853.96	-1.24775	0.403867	-3.08951	0.00200486	0.010896	MIMAT0004582	MIMAT0004582	chr5	138165746	138165767	-_x000D_
mmu-miR-296-5p	109.119	-1.59422	0.520811	-3.06102	0.00220582	0.011692	MIMAT0000374	MIMAT0000374	chr2	174267093	174267113	-_x000D_
mmu-miR-344d-3p	102.498	1.93465	0.632248	3.05996	0.00221369	0.011692	MIMAT0014808	MIMAT0014808	chr7	61683127	61683148	-_x000D_
mmu-miR-344d-3p	102.498	1.93465	0.632248	3.05996	0.00221369	0.011692	MIMAT0014808_1	MIMAT0014808	chr7	61685279	61685300	-_x000D_
mmu-miR-344d-3p	102.498	1.93465	0.632248	3.05996	0.00221369	0.011692	MIMAT0014808_2	MIMAT0014808	chr7	61726256	61726277	-_x000D_
mmu-miR-1934-5p	21.9122	-2.77598	0.912167	-3.04328	0.00234013	0.0121882	MIMAT0009398	MIMAT0009398	chr11	69663055	69663077	+_x000D_
mmu-miR-574-3p	185.562	-1.48275	0.492492	-3.01071	0.00260637	0.0133889	MIMAT0004894	MIMAT0004894	chr5	64970364	64970385	+_x000D_
mmu-miR-3473a	562.559	-1.46711	0.49924	-2.93868	0.00329615	0.0167035	MIMAT0015645	MIMAT0015645	chrX	162874920	162874937	-_x000D_
mmu-miR-125b-1-3p	2191.27	1.20024	0.409155	2.93347	0.00335194	0.0167597	MIMAT0004669	MIMAT0004669	chr9	41581980	41582001	+_x000D_
mmu-miR-6538	43.3314	-2.71562	0.957683	-2.83561	0.00457382	0.0225682	MIMAT0025583	MIMAT0025583	chr12	26414970	26414988	-_x000D_
mmu-let-7e-5p	2054.85	1.3895	0.491317	2.8281	0.00468249	0.0228043	MIMAT0000524	MIMAT0000524	chr17	17830366	17830387	+_x000D_
mmu-miR-296-3p	342.318	-1.3115	0.46455	-2.82317	0.00475518	0.0228614	MIMAT0004576	MIMAT0004576	chr2	174267058	174267079	-_x000D_
mmu-miR-1983	59.4361	1.78122	0.632059	2.81812	0.00483051	0.0229296	MIMAT0009455	MIMAT0009455	chr13	21896930	21896950	-_x000D_
mmu-miR-6412	28.0566	2.3551	0.840482	2.80209	0.00507734	0.0238	MIMAT0025165	MIMAT0025165	chr10	122648412	122648433	+_x000D_
mmu-miR-345-5p	75.6734	-1.62309	0.580508	-2.79597	0.00517435	0.0239553	MIMAT0000595	MIMAT0000595	chr12	108836989	108837010	+_x000D_
mmu-miR-324-5p	44.2238	-1.91551	0.693939	-2.76034	0.00577416	0.0264062	MIMAT0000555	MIMAT0000555	chr11	70012060	70012082	+_x000D_
mmu-miR-152-3p	8356.83	1.11022	0.40555	2.73757	0.00618943	0.0279643	MIMAT0000162	MIMAT0000162	chr11	96850439	96850459	+_x000D_
mmu-miR-125a-5p	2316.64	1.23713	0.453996	2.72497	0.00643067	0.028695	MIMAT0000135	MIMAT0000135	chr17	17830817	17830840	+_x000D_
mmu-let-7j	170.511	1.53307	0.563376	2.72122	0.0065042	0.028695	MI0021908	MI0021908	chr3	140028249	140028370	+_x000D_
mmu-let-7j	170.511	1.53307	0.563376	2.72122	0.0065042	0.028695	MIMAT0025123	MIMAT0025123	chr3	140028281	140028304	+_x000D_
mmu-miR-29b-1-5p	6.11981	5.59311	2.06982	2.70222	0.0068878	NA	MIMAT0004523	MIMAT0004523	chr6	31063067	31063088	-_x000D_
mmu-miR-1945	93.1185	-1.42277	0.53706	-2.64917	0.00806887	0.035184	MIMAT0009410	MIMAT0009410	chr16	11254381	11254402	-_x000D_
mmu-miR-181d-5p	66.5862	1.62472	0.616196	2.6367	0.00837163	0.0360846	MIMAT0004324	MIMAT0004324	chr8	84178759	84178781	-_x000D_
mmu-miR-709	31.7708	-2.05102	0.781157	-2.62562	0.00864907	0.0368568	MIMAT0003499	MIMAT0003499	chr8	84086167	84086185	+_x000D_
mmu-miR-3102-3p	91.293	-1.42475	0.546682	-2.60617	0.00915607	0.0385789	MIMAT0014936	MIMAT0014936	chr7	100882307	100882329	-_x000D_
mmu-miR-467c-5p	19.5668	2.62806	1.01179	2.59744	0.00939205	0.0389613	MIMAT0004885	MIMAT0004885	chr2	10473941	10473962	+_x000D_
mmu-miR-3102-3p.2-3p	18.8921	-2.4635	0.949265	-2.59516	0.00945461	0.0389613	MIMAT0014935	MIMAT0014935	chr7	100882330	100882350	-_x000D_
mmu-let-7b-3p	296.271	-1.13405	0.440191	-2.57626	0.00998742	0.0407096	MIMAT0004621	MIMAT0004621	chr15	85707379	85707400	+_x000D_
mmu-miR-669p-5p	57.7785	1.66202	0.65322	2.54435	0.0109482	0.0441461	MIMAT0014889	MIMAT0014889	chr2	10489130	10489153	+_x000D_
mmu-miR-669p-5p	57.7785	1.66202	0.65322	2.54435	0.0109482	0.0441461	MIMAT0014889_1	MIMAT0014889	chr2	10496511	10496534	+_x000D_
mmu-miR-744-3p	13.2851	-2.85648	1.12894	-2.53023	0.0113988	0.0454738	MIMAT0004820	MIMAT0004820	chr11	65734742	65734763	-_x000D_
mmu-miR-532-3p	162.966	-1.19565	0.474599	-2.51929	0.0117592	0.046418	MIMAT0004781	MIMAT0004781	chrX	7248419	7248440	-_x000D_
mmu-miR-486a-5p	3629.46	-4.89131	1.95857	-2.49739	0.0125112	0.0488718	MIMAT0003130	MIMAT0003130	chr8	23142587	23142608	+_x000D_
mmu-miR-221-3p	3957.43	1.05785	0.426775	2.47871	0.0131859	0.0506374	MIMAT0000669	MIMAT0000669	chrX	19146307	19146329	-_x000D_
mmu-miR-574-5p	52.3561	-1.75997	0.710401	-2.47743	0.0132333	0.0506374	MIMAT0004893	MIMAT0004893	chr5	64970328	64970350	+_x000D_
mmu-miR-17-3p	180.971	-1.18904	0.481544	-2.46922	0.0135409	0.0512914	MIMAT0000650	MIMAT0000650	chr14	115043721	115043742	+_x000D_
mmu-miR-30e-3p	346.63	1.08354	0.439928	2.463	0.013778	0.0516676	MIMAT0000249	MIMAT0000249	chr4	120772618	120772639	-_x000D_
mmu-miR-7003-3p	9.96919	-3.29649	1.34666	-2.44789	0.0143694	0.0530163	MIMAT0027911	MIMAT0027911	chr2	163068137	163068155	+_x000D_
mmu-miR-451a	3323.41	-4.82083	1.97041	-2.44662	0.0144204	0.0530163	MIMAT0001632	MIMAT0001632	chr11	78073186	78073207	+_x000D_
mmu-miR-142a-5p	403.033	-6.10739	2.51374	-2.4296	0.0151153	0.0550314	MIMAT0000154	MIMAT0000154	chr11	87756867	87756887	+_x000D_
mmu-miR-6516-3p	9.45076	3.96817	1.63696	2.4241	0.0153463	0.0553351	MIMAT0027344	MIMAT0027344	chr11	117077412	117077433	+_x000D_
mmu-miR-361-3p	251.52	1.24132	0.51406	2.41473	0.0157467	0.0560453	MIMAT0017075	MIMAT0017075	chrX	113074827	113074851	-_x000D_
mmu-miR-125b-5p	12005.1	0.995245	0.412531	2.41253	0.0158421	0.0560453	MIMAT0000136	MIMAT0000136	chr16	77646279	77646300	+_x000D_
mmu-miR-125b-5p	12005.1	0.995245	0.412531	2.41253	0.0158421	0.0560453	MIMAT0000136_1	MIMAT0000136	chr9	41581940	41581961	+_x000D_
mmu-miR-1895	39.6769	-1.67612	0.69789	-2.40169	0.0163194	0.0571943	MIMAT0007867	MIMAT0007867	chr3	134240515	134240536	-_x000D_
mmu-miR-5100	47.649	-1.60274	0.671733	-2.38598	0.0170335	0.0591442	MIMAT0020607	MIMAT0020607	chr11	60728698	60728718	+_x000D_
mmu-miR-19a-3p	13.6643	2.95074	1.24678	2.36668	0.0179482	0.0617485	MIMAT0000651	MIMAT0000651	chr14	115044048	115044070	+_x000D_
mmu-miR-466c-5p	24.7739	-2.11983	0.908419	-2.33354	0.0196199	0.0668859	MIMAT0004877	MIMAT0004877	chr2	10481544	10481567	+_x000D_
mmu-miR-466c-5p	24.7739	-2.11983	0.908419	-2.33354	0.0196199	0.0668859	MIMAT0004877_1	MIMAT0004877	chr2	10483979	10484002	+_x000D_
mmu-miR-466c-5p	24.7739	-2.11983	0.908419	-2.33354	0.0196199	0.0668859	MIMAT0004877_2	MIMAT0004877	chr2	10491349	10491372	+_x000D_
mmu-miR-34b-3p	109.362	1.2155	0.524638	2.31683	0.0205129	0.0693002	MIMAT0004581	MIMAT0004581	chr9	51103574	51103595	-_x000D_
mmu-miR-3535	30576.5	-1.00388	0.436567	-2.2995	0.0214767	0.071882	MIMAT0031410	MIMAT0031410	chr1	86352062	86352087	-_x000D_
mmu-miR-450b-5p	220.588	1.21951	0.531085	2.29627	0.0216604	0.071882	MIMAT0003511	MIMAT0003511	chrX	53048044	53048065	-_x000D_
mmu-miR-15b-3p	95.512	1.50077	0.656759	2.28512	0.0223059	0.0733747	MIMAT0004521	MIMAT0004521	chr3	69009813	69009834	+_x000D_
mmu-miR-369-3p	12.7234	-2.644	1.15974	-2.27981	0.0226191	0.0737579	MIMAT0003186	MIMAT0003186	chr12	109743466	109743486	+_x000D_
mmu-miR-298-5p	85.9652	-1.26127	0.554795	-2.2734	0.0230021	0.0737761	MIMAT0000376	MIMAT0000376	chr2	174267553	174267575	-_x000D_
mmu-miR-652-3p	326.955	-1.04195	0.458375	-2.27313	0.0230181	0.0737761	MIMAT0003711	MIMAT0003711	chrX	142739060	142739080	+_x000D_
mmu-miR-324-3p	106.715	-1.17883	0.525801	-2.24197	0.0249635	0.0793333	MIMAT0000556	MIMAT0000556	chr11	70012095	70012114	+_x000D_
mmu-miR-712-5p	22.0724	-1.96841	0.88402	-2.22665	0.0259706	0.081534	NA	NA	NA	NA	NA	NA_x000D_
mmu-miR-30a-3p	498.816	1.02157	0.459161	2.22486	0.0260909	0.081534	MIMAT0000129	MIMAT0000129	chr1	23272315	23272336	+_x000D_
mmu-let-7c-5p	9781.61	1.05186	0.473872	2.21971	0.0264385	0.0819376	MIMAT0000523	MIMAT0000523	chr15	85706616	85706637	+_x000D_
mmu-let-7c-5p	9781.61	1.05186	0.473872	2.21971	0.0264385	0.0819376	MIMAT0000523_1	MIMAT0000523	chr16	77599672	77599693	+_x000D_
mmu-miR-672-5p	11.7236	2.96282	1.3446	2.20349	0.02756	0.084713	MIMAT0003735	MIMAT0003735	chrX	104116228	104116250	-_x000D_
mmu-miR-24-3p	5072.38	0.84564	0.38614	2.18998	0.0285255	0.086555	MIMAT0000219	MIMAT0000219	chr13	63301251	63301272	+_x000D_
mmu-miR-24-3p	5072.38	0.84564	0.38614	2.18998	0.0285255	0.086555	MIMAT0000219_1	MIMAT0000219	chr8	84208875	84208896	+_x000D_
mmu-miR-322-5p	165.205	1.12316	0.513169	2.18867	0.0286209	0.086555	MIMAT0000548	MIMAT0000548	chrX	53054306	53054327	-_x000D_
mmu-miR-206-3p	37.3941	1.61121	0.740176	2.1768	0.0294956	0.0884868	MIMAT0000239	MIMAT0000239	chr1	20679055	20679076	+_x000D_
mmu-miR-350-3p	500.849	-0.921951	0.424166	-2.17356	0.0297381	0.0885064	MIMAT0000605	MIMAT0000605	chr1	176772342	176772363	-_x000D_
mmu-miR-328-3p	1631.77	-0.920567	0.428158	-2.15006	0.0315501	0.0931598	MIMAT0000565	MIMAT0000565	chr8	105308379	105308400	-_x000D_
mmu-miR-127-3p	22.7149	-1.83512	0.86186	-2.12925	0.0332334	0.0968131	MIMAT0000139	MIMAT0000139	chr12	109592888	109592909	+_x000D_
mmu-miR-3470a	115.201	-1.29304	0.607518	-2.1284	0.0333037	0.0968131	MIMAT0015640	MIMAT0015640	chr6	83090360	83090380	-_x000D_
mmu-miR-362-5p	72.1413	1.38147	0.650784	2.12277	0.033773	0.0974221	MIMAT0000706	MIMAT0000706	chrX	7242019	7242042	-_x000D_
mmu-miR-331-3p	257.733	-0.966764	0.458849	-2.10693	0.0351233	0.100544	MIMAT0000571	MIMAT0000571	chr10	93963783	93963803	-_x000D_
mmu-miR-3473e	118.225	-1.24646	0.596044	-2.09123	0.0365076	0.103715	MIMAT0025587	MIMAT0025587	chr5	31667296	31667316	-_x000D_
mmu-miR-151-3p	11414.9	-0.847726	0.408506	-2.07519	0.0379692	0.107056	MIMAT0000161	MIMAT0000161	chr15	73254820	73254840	-_x000D_
mmu-miR-99b-3p	1980.68	-0.841576	0.406868	-2.06842	0.0386002	0.107346	MIMAT0004525	MIMAT0004525	chr17	17830232	17830253	+_x000D_
mmu-miR-363-3p	49.2925	-4.87257	2.35623	-2.06795	0.0386447	0.107346	MIMAT0000708	MIMAT0000708	chrX	52741697	52741718	-_x000D_
mmu-miR-30b-5p	312.53	0.996342	0.483848	2.0592	0.0394747	0.108846	MIMAT0000130	MIMAT0000130	chr15	68337469	68337490	-_x000D_
mmu-miR-582-3p	48.9076	1.37309	0.668775	2.05314	0.0400593	0.109651	MIMAT0005292	MIMAT0005292	chr13	109324790	109324810	+_x000D_
mmu-miR-877-5p	90.0853	-1.31995	0.646181	-2.04269	0.041083	0.111474	MIMAT0004861	MIMAT0004861	chr17	35960795	35960814	-_x000D_
mmu-miR-1306-5p	46.7838	-1.33863	0.656091	-2.04031	0.0413199	0.111474	MIMAT0019136	MIMAT0019136	chr16	18284288	18284310	-_x000D_
mmu-miR-29b-3p	111.551	1.45991	0.725062	2.0135	0.0440624	0.118024	MIMAT0000127	MIMAT0000127	chr1	195037091	195037113	+_x000D_
mmu-miR-29b-3p	111.551	1.45991	0.725062	2.0135	0.0440624	0.118024	MIMAT0000127_1	MIMAT0000127	chr6	31063025	31063047	-_x000D_
mmu-miR-126a-3p	1543.26	0.796172	0.39742	2.00335	0.0451394	0.120052	MIMAT0000138	MIMAT0000138	chr2	26591402	26591423	+_x000D_
mmu-miR-5121	170.97	-1.00716	0.50999	-1.97485	0.0482849	0.127513	MIMAT0020629	MIMAT0020629	chr7	45126925	45126945	-_x000D_
mmu-miR-5126	43.6797	-1.80924	0.920275	-1.96598	0.049301	0.129286	MIMAT0020637	MIMAT0020637	chr1	84695890	84695911	+_x000D_

## Sheet: S2. SVR miRNA expression
Supplemental Table S2. Differentially expressed miRNAs in SVR cells treated with Enoxacin. All significant miRNAs with altered abundance in SVR cells treated with 100 µM enoxacin for 72 hours with p<0.05.
Gene_ID	baseMean	log2FoldChange	lfcSE	stat	pvalue	padj	ID	Gene.name	chromosome	Start	End	strand_x000D_
mmu-miR-7075-3p	5.19167	5.65915	2.26994	-2.49308	0.0126639	NA	MIMAT0028057	MIMAT0028057	chr8	107096025	107096045	-_x000D_
mmu-miR-200c-3p	28.3252	4.43433	1.25906	-3.52195	0.000428392	0.00297019	MIMAT0000657	MIMAT0000657	chr6	124718324	124718346	-_x000D_
mmu-miR-200b-3p	119.487	4.42809	1.90401	-2.32567	0.0200363	0.0718542	MIMAT0000233	MIMAT0000233	chr4	156055685	156055706	-_x000D_
mmu-miR-741-3p	9.84015	4.38842	1.59039	-2.75934	0.00579183	0.0255233	MIMAT0004236	MIMAT0004236	chrX	66796809	66796831	-_x000D_
mmu-miR-375-3p	10.002	4.04481	1.93837	-2.08671	0.0369143	0.116306	MIMAT0000739	MIMAT0000739	chr1	74900661	74900682	-_x000D_
mmu-miR-26a-2-3p	146.912	3.92146	0.502386	-7.80567	5.91842e-15	2.36737e-13	MIMAT0017058	MIMAT0017058	chr10	126995581	126995602	+_x000D_
mmu-miR-465c-5p	16.2906	3.83087	1.21551	-3.15167	0.00162341	0.00907714	MIMAT0004873	MIMAT0004873	chrX	66826004	66826025	-_x000D_
mmu-miR-465b-5p	19.7774	3.69845	1.04919	-3.52504	0.000423419	0.00297019	MIMAT0004871	MIMAT0004871	chrX	66829249	66829270	-_x000D_
mmu-miR-7a-5p	15706.6	3.59814	0.343921	-10.4621	1.28944e-25	1.67628e-23	MIMAT0000677	MIMAT0000677	chr13	58392841	58392863	-_x000D_
mmu-miR-878-5p	6.57379	3.42955	1.67347	-2.04937	0.0404262	0.123657	MIMAT0004932	MIMAT0004932	chrX	66801554	66801575	-_x000D_
mmu-miR-126a-5p	7836.46	3.39331	0.419182	-8.09506	5.72346e-16	2.9762e-14	MIMAT0000137	MIMAT0000137	chr2	26591365	26591385	+_x000D_
mmu-let-7f-5p	80212.5	3.35191	0.298075	-11.2452	2.44596e-29	1.2719e-26	MIMAT0000525	MIMAT0000525	chr13	48537889	48537910	-_x000D_
mmu-miR-98-5p	2080.44	3.20696	0.308185	-10.406	2.32915e-25	2.42232e-23	MIMAT0000545	MIMAT0000545	chrX	151913229	151913250	+_x000D_
mmu-miR-21a-5p	575621	3.11115	0.290045	-10.7264	7.64932e-27	1.32588e-24	MIMAT0000530	MIMAT0000530	chr11	86584120	86584141	-_x000D_
mmu-miR-872-5p	788.4	3.03811	0.330382	-9.19576	3.72357e-20	2.76608e-18	MIMAT0004934	MIMAT0004934	chr4	94665167	94665187	+_x000D_
mmu-miR-598-3p	180.046	3.03599	0.4321	-7.02613	2.12341e-12	6.90108e-11	MIMAT0004942	MIMAT0004942	chr14	63727236	63727257	+_x000D_
mmu-miR-184-3p	50.2286	2.96031	1.03834	-2.851	0.00435814	0.0207911	MIMAT0000213	MIMAT0000213	chr9	89802263	89802284	-_x000D_
mmu-miR-26b-5p	3304.05	2.94833	0.315919	-9.33253	1.03377e-20	8.95934e-19	MIMAT0000534	MIMAT0000534	chr1	74394324	74394344	+_x000D_
mmu-miR-10b-5p	124921	2.78045	0.351162	-7.91787	2.41615e-15	1.047e-13	MIMAT0000208	MIMAT0000208	chr2	74726074	74726096	+_x000D_
mmu-miR-881-3p	80.5312	2.75411	0.669239	-4.11529	3.86694e-05	0.000352774	MIMAT0004846	MIMAT0004846	chrX	66801954	66801975	-_x000D_
mmu-let-7e-5p	23858.2	2.74152	0.320162	-8.56291	1.10055e-17	7.15355e-16	MIMAT0000524	MIMAT0000524	chr17	17830366	17830387	+_x000D_
mmu-miR-206-3p	2303.68	2.58974	0.357085	-7.25244	4.09329e-13	1.50452e-11	MIMAT0000239	MIMAT0000239	chr1	20679055	20679076	+_x000D_
mmu-miR-704	29.8498	2.57169	0.874181	-2.94183	0.00326281	0.0166339	MIMAT0003494	MIMAT0003494	chr6	47803590	47803610	-_x000D_
mmu-miR-465b-3p	12.7716	2.47659	1.14332	-2.16614	0.0303008	0.0990969	MIMAT0004872	MIMAT0004872	chrX	66829212	66829233	-_x000D_
mmu-let-7a-5p	19470.6	2.43745	0.361897	-6.73522	1.63684e-11	4.71262e-10	MIMAT0000521	MIMAT0000521	chr13	48538239	48538260	-_x000D_
mmu-miR-146a-5p	27074.7	2.43018	0.299484	-8.11456	4.8756e-16	2.81701e-14	MIMAT0000158	MIMAT0000158	chr11	43374435	43374456	-_x000D_
mmu-miR-361-3p	2029.11	2.38673	0.329453	-7.24451	4.33997e-13	1.50452e-11	MIMAT0017075	MIMAT0017075	chrX	113074827	113074851	-_x000D_
mmu-miR-9-5p	6268.38	2.37006	0.297894	-7.95604	1.77633e-15	8.3972e-14	MIMAT0000142	MIMAT0000142	chr13	83738821	83738843	+_x000D_
mmu-miR-100-5p	6571.05	2.33994	0.347799	-6.72785	1.72192e-11	4.71262e-10	MIMAT0000655	MIMAT0000655	chr9	41531437	41531458	+_x000D_
mmu-miR-126a-3p	401144	2.32316	0.39324	-5.90774	3.46831e-09	8.19781e-08	MIMAT0000138	MIMAT0000138	chr2	26591402	26591423	+_x000D_
mmu-miR-335-5p	740.407	2.32296	0.359098	-6.46886	9.8745e-11	2.56737e-09	MIMAT0000766	MIMAT0000766	chr6	30741314	30741336	+_x000D_
mmu-miR-5114	52.7945	2.31995	0.614189	-3.77726	0.000158561	0.00123063	MIMAT0020622	MIMAT0020622	chr19	44303171	44303192	+_x000D_
mmu-miR-155-5p	4460.93	2.30706	0.33275	-6.93331	4.11109e-12	1.25751e-10	MIMAT0000165	MIMAT0000165	chr16	84714143	84714165	+_x000D_
mmu-miR-16-2-3p	45.8246	2.21435	0.723338	-3.06129	0.00220383	0.0119374	MIMAT0017018	MIMAT0017018	chr3	69009960	69009981	+_x000D_
mmu-miR-181d-5p	416.348	2.16073	0.423992	-5.09616	3.4661e-07	5.8141e-06	MIMAT0004324	MIMAT0004324	chr8	84178759	84178781	-_x000D_
mmu-miR-467c-5p	166.589	2.0893	0.41632	-5.01848	5.2081e-07	7.73775e-06	MIMAT0004885	MIMAT0004885	chr2	10473941	10473962	+_x000D_
mmu-let-7a-1-3p	858.052	2.08339	0.379225	-5.49381	3.93363e-08	7.96504e-07	MIMAT0004620	MIMAT0004620	chr13	48538188	48538209	-_x000D_
mmu-let-7c-5p	59384.1	2.01454	0.404087	-4.98541	6.18316e-07	8.93124e-06	MIMAT0000523	MIMAT0000523	chr15	85706616	85706637	+_x000D_
mmu-miR-199b-3p	69.1592	1.97225	0.575355	-3.42788	0.000608307	0.00410805	MIMAT0004667	MIMAT0004667	chr2	32318524	32318545	+_x000D_
mmu-miR-1839-5p	707.34	1.90788	0.380138	-5.01892	5.19625e-07	7.73775e-06	MIMAT0009456	MIMAT0009456	chr7	81529919	81529940	+_x000D_
mmu-miR-99a-5p	20320.6	1.90632	0.391535	-4.86883	1.1226e-06	1.5362e-05	MIMAT0000131	MIMAT0000131	chr16	77598940	77598961	+_x000D_
mmu-miR-27b-5p	337.939	1.84694	0.458121	-4.03156	5.54072e-05	0.000472324	MIMAT0004522	MIMAT0004522	chr13	63300718	63300739	+_x000D_
mmu-miR-322-3p	2409.73	1.79883	0.327509	-5.49247	3.96349e-08	7.96504e-07	MIMAT0000549	MIMAT0000549	chrX	53054269	53054289	-_x000D_
mmu-miR-224-5p	223.572	1.79089	0.417928	-4.28515	1.82615e-05	0.000182615	MIMAT0000671	MIMAT0000671	chrX	72261085	72261105	-_x000D_
mmu-miR-1969	24.5041	1.7671	0.84828	-2.08315	0.0372374	0.116306	MIMAT0009442	MIMAT0009442	chr8	70925541	70925563	+_x000D_
mmu-miR-344b-3p	34.7797	1.71218	0.7164	-2.38998	0.0168495	0.0621108	MIMAT0014926	MIMAT0014926	chr7	61790522	61790543	-_x000D_
mmu-miR-23b-5p	52.3255	1.69759	0.678257	-2.50288	0.0123188	0.0485287	MIMAT0016980	MIMAT0016980	chr13	63300492	63300512	+_x000D_
mmu-miR-501-3p	1819.84	1.68683	0.314113	-5.37013	7.86819e-08	1.51536e-06	MIMAT0003509	MIMAT0003509	chrX	7241270	7241291	-_x000D_
mmu-miR-16-1-3p	2498.13	1.60469	0.484891	-3.30938	0.000935042	0.00565374	MIMAT0004625	MIMAT0004625	chr14	61631894	61631915	-_x000D_
mmu-miR-22-3p	2110.68	1.59629	0.364881	-4.37481	1.2154e-05	0.000134469	MIMAT0000531	MIMAT0000531	chr11	75463772	75463793	+_x000D_
mmu-let-7j	924.474	1.58875	0.368026	-4.31696	1.58195e-05	0.00016788	MI0021908	MI0021908	chr3	140028249	140028370	+_x000D_
mmu-miR-340-5p	1510.79	1.58007	0.357926	-4.41451	1.01239e-05	0.000114444	MIMAT0004651	MIMAT0004651	chr11	50069720	50069741	+_x000D_
mmu-miR-128-3p	1864.23	1.57764	0.33209	-4.75065	2.0276e-06	2.70346e-05	MIMAT0000140	MIMAT0000140	chr1	128202404	128202424	+_x000D_
mmu-miR-181b-1-3p	100.296	1.57671	0.46755	-3.37228	0.000745477	0.00485104	MIMAT0017067	MIMAT0017067	chr1	137966690	137966710	+_x000D_
mmu-miR-10b-3p	499.76	1.56626	0.332766	-4.7068	2.51636e-06	3.27126e-05	MIMAT0004538	MIMAT0004538	chr2	74726114	74726135	+_x000D_
mmu-miR-15b-3p	704.658	1.56624	0.348966	-4.48823	7.18157e-06	8.44995e-05	MIMAT0004521	MIMAT0004521	chr3	69009813	69009834	+_x000D_
mmu-miR-10a-5p	130456	1.53171	0.377056	-4.06228	4.85952e-05	0.000435681	MIMAT0000648	MIMAT0000648	chr11	96317186	96317208	+_x000D_
mmu-miR-467e-5p	158.892	1.49795	0.411697	-3.63847	0.000274263	0.00203738	MIMAT0005293	MIMAT0005293	chr2	10505731	10505752	+_x000D_
mmu-miR-20a-5p	3996.94	1.48106	0.293351	-5.04876	4.44683e-07	7.22609e-06	MIMAT0000529	MIMAT0000529	chr14	115044183	115044205	+_x000D_
mmu-miR-221-5p	4612.92	1.46974	0.324371	-4.53106	5.86897e-06	7.09736e-05	MIMAT0017060	MIMAT0017060	chrX	19146344	19146369	-_x000D_
mmu-miR-203-3p	41.8056	1.46784	0.661396	-2.2193	0.0264663	0.089532	MIMAT0000236	MIMAT0000236	chr12	112130927	112130948	+_x000D_
mmu-let-7d-5p	13473	1.43961	0.365788	-3.93562	8.29812e-05	0.000684924	MIMAT0000383	MIMAT0000383	chr13	48536078	48536099	-_x000D_
mmu-miR-28a-3p	1784.63	1.41036	0.328989	-4.28694	1.8115e-05	0.000182615	MIMAT0004661	MIMAT0004661	chr16	24827908	24827929	+_x000D_
mmu-let-7b-5p	18925.2	1.40342	0.347766	-4.03552	5.44806e-05	0.000472165	MIMAT0000522	MIMAT0000522	chr15	85707325	85707346	+_x000D_
mmu-miR-147-5p	305.314	1.39519	0.390977	-3.56848	0.000359052	0.00262967	MIMAT0017269	MIMAT0017269	chr2	122640814	122640837	+_x000D_
mmu-miR-3081-3p	254.381	1.37448	0.390911	-3.51609	0.000437945	0.00299646	MIMAT0014871	MIMAT0014871	chr16	44558058	44558080	-_x000D_
mmu-miR-26b-3p	42.2266	1.37325	0.635372	-2.16133	0.0306702	0.0995026	MIMAT0004630	MIMAT0004630	chr1	74394360	74394381	+_x000D_
mmu-let-7g-5p	125402	1.36403	0.292253	-4.66728	3.05209e-06	3.77878e-05	MIMAT0000121	MIMAT0000121	chr9	106178846	106178867	+_x000D_
mmu-miR-30a-3p	5313.26	1.34394	0.312786	-4.29667	1.73386e-05	0.000180321	MIMAT0000129	MIMAT0000129	chr1	23272315	23272336	+_x000D_
mmu-miR-542-3p	850.836	1.33551	0.321966	-4.14798	3.35426e-05	0.000311467	MIMAT0003172	MIMAT0003172	chrX	53049415	53049436	-_x000D_
mmu-miR-335-3p	21268.3	1.32191	0.372616	-3.54766	0.000388676	0.00280711	MIMAT0004704	MIMAT0004704	chr6	30741354	30741375	+_x000D_
mmu-miR-146b-5p	923.022	1.2872	0.348469	-3.69387	0.000220864	0.00168896	MIMAT0003475	MIMAT0003475	chr19	46342790	46342811	+_x000D_
mmu-miR-344d-3p	70.9584	1.26746	0.568624	-2.22899	0.0258143	0.0886313	MIMAT0014808	MIMAT0014808	chr7	61683127	61683148	-_x000D_
mmu-miR-760-3p	82.7461	1.24449	0.551959	-2.25469	0.024153	0.0848618	MIMAT0003898	MIMAT0003898	chr3	122293615	122293634	-_x000D_
mmu-miR-503-3p	123.357	1.23859	0.465008	-2.66359	0.00773116	0.0332248	MIMAT0004790	MIMAT0004790	chrX	53053987	53054008	-_x000D_
mmu-miR-99b-5p	269237	1.20945	0.424027	-2.85229	0.00434052	0.0207911	MIMAT0000132	MIMAT0000132	chr17	17830194	17830215	+_x000D_
mmu-miR-1964-3p	278.482	1.20202	0.490265	-2.45177	0.0142156	0.0539569	MIMAT0009437	MIMAT0009437	chr7	29773344	29773365	+_x000D_
mmu-miR-6540-5p	243.072	1.20108	0.43069	-2.78873	0.00529144	0.0245674	MIMAT0025585	MIMAT0025585	chr16	42303425	42303446	-_x000D_
mmu-miR-669p-5p	632.998	1.19861	0.40283	-2.97546	0.0029255	0.0152126	MIMAT0014889	MIMAT0014889	chr2	10489130	10489153	+_x000D_
mmu-miR-351-3p	51.0191	1.19179	0.602391	-1.97843	0.0478806	0.141465	MIMAT0017042	MIMAT0017042	chrX	53053276	53053296	-_x000D_
mmu-miR-450b-5p	356.643	1.19026	0.355255	-3.35043	0.000806858	0.00511666	MIMAT0003511	MIMAT0003511	chrX	53048044	53048065	-_x000D_
mmu-miR-338-5p	110.987	1.16106	0.448643	-2.58794	0.00965523	0.0395332	MIMAT0004647	MIMAT0004647	chr11	120014816	120014837	-_x000D_
mmu-miR-140-5p	313.085	1.14909	0.434122	-2.64693	0.00812261	0.034621	MIMAT0000151	MIMAT0000151	chr8	107551249	107551270	+_x000D_
mmu-miR-674-3p	6076.76	1.14615	0.342871	-3.3428	0.000829374	0.00519608	MIMAT0003741	MIMAT0003741	chr2	117185186	117185207	+_x000D_
mmu-miR-128-1-5p	133.528	1.13835	0.433226	-2.62762	0.00859848	0.0360581	MIMAT0016982	MIMAT0016982	chr1	128202369	128202389	+_x000D_
mmu-miR-1981-5p	13495.7	1.12418	0.337971	-3.32626	0.000880205	0.00538479	MIMAT0009458	MIMAT0009458	chr1	184822465	184822488	-_x000D_
mmu-miR-10a-3p	944.852	1.091	0.323736	-3.37004	0.00075158	0.00485104	MIMAT0004659	MIMAT0004659	chr11	96317227	96317248	+_x000D_
mmu-miR-342-5p	130.051	1.04904	0.472841	-2.21858	0.0265152	0.089532	MIMAT0004653	MIMAT0004653	chr12	108658638	108658659	+_x000D_
mmu-miR-30e-3p	2726.11	1.02715	0.303742	-3.38164	0.000720545	0.00480363	MIMAT0000249	MIMAT0000249	chr4	120772618	120772639	-_x000D_
mmu-miR-221-3p	33980.5	1.00091	0.32731	-3.058	0.00222818	0.0119449	MIMAT0000669	MIMAT0000669	chrX	19146307	19146329	-_x000D_
mmu-miR-125a-5p	17798.3	1.0003	0.401662	-2.49041	0.0127596	0.0498873	MIMAT0000135	MIMAT0000135	chr17	17830817	17830840	+_x000D_
mmu-miR-28a-5p@	316.699	0.990211	0.35707	-2.77315	0.00555162	0.0248866	NA	NA	NA	NA	NA	NA_x000D_
mmu-miR-181b-5p	4409.85	0.954127	0.345602	-2.76077	0.00576654	0.0255233	MIMAT0000673	MIMAT0000673	chr1	137966650	137966673	+_x000D_
mmu-miR-148a-3p	66925.2	0.94187	0.396628	-2.37469	0.0175637	0.0638678	MIMAT0000516	MIMAT0000516	chr6	51269829	51269850	-_x000D_
mmu-miR-22-5p	282.775	0.871427	0.364988	-2.38755	0.016961	0.0621108	MIMAT0004629	MIMAT0004629	chr11	75463734	75463755	+_x000D_
mmu-miR-106b-5p	1201.13	0.857394	0.395414	-2.16834	0.0301325	0.0990969	MIMAT0000386	MIMAT0000386	chr5	138165787	138165807	-_x000D_
mmu-miR-24-3p	26677.4	0.840269	0.289358	-2.90391	0.00368537	0.0180792	MIMAT0000219	MIMAT0000219	chr13	63301251	63301272	+_x000D_
mmu-miR-32-5p	260.928	0.810698	0.379181	-2.13803	0.0325147	0.103728	MIMAT0000654	MIMAT0000654	chr4	56895272	56895293	-_x000D_
mmu-miR-139-3p	778.943	0.801001	0.356598	-2.24623	0.024689	0.0861631	MIMAT0004662	MIMAT0004662	chr7	101475418	101475439	+_x000D_
mmu-miR-93-5p	10315.8	0.796293	0.317848	-2.50527	0.0122359	0.0485287	MIMAT0000540	MIMAT0000540	chr5	138165574	138165596	-_x000D_
mmu-miR-139-5p	4536.74	0.763223	0.309253	-2.46796	0.0135887	0.0519569	MIMAT0000656	MIMAT0000656	chr7	101475382	101475403	+_x000D_
mmu-miR-99b-3p	23708.1	0.731575	0.349212	-2.09493	0.0361773	0.114708	MIMAT0004525	MIMAT0004525	chr17	17830232	17830253	+_x000D_
mmu-miR-27a-5p	14242.5	0.72217	0.364041	-1.98376	0.0472829	0.140498	MIMAT0004633	MIMAT0004633	chr8	84208685	84208706	+_x000D_
mmu-miR-374b-5p@	4409.6	0.715396	0.326643	-2.19015	0.0285136	0.0944399	NA	NA	NA	NA	NA	NA_x000D_
mmu-miR-467a-5p@	2933.06	0.710904	0.34147	-2.08189	0.0373521	0.116306	NA	NA	NA	NA	NA	NA_x000D_
mmu-miR-1198-5p	1858.37	0.700735	0.343462	-2.04021	0.0413293	0.12568	MIMAT0005859	MIMAT0005859	chrX	7807142	7807163	+_x000D_
mmu-miR-874-3p	1847.41	-0.729401	0.362032	2.01474	0.0439315	0.132049	MIMAT0004853	MIMAT0004853	chr13	58023135	58023156	-_x000D_
mmu-miR-365-3p	3879.13	-0.730551	0.3558	2.05326	0.0400469	0.123221	MIMAT0000711	MIMAT0000711	chr11	79726467	79726488	+_x000D_
mmu-miR-181a-5p	12816.1	-0.768486	0.310207	2.47734	0.0132368	0.050986	MIMAT0000210	MIMAT0000210	chr1	137966468	137966490	+_x000D_
mmu-miR-421-3p	2020.41	-0.781069	0.308727	2.52997	0.0114074	0.0463425	MIMAT0004869	MIMAT0004869	chrX	103572930	103572952	-_x000D_
mmu-miR-669d-5p	112.131	-0.897409	0.444427	2.01925	0.0434614	0.131395	MIMAT0005833	MIMAT0005833	chr2	10468384	10468405	+_x000D_
mmu-miR-872-3p	753.705	-0.905326	0.335289	2.70013	0.00693115	0.030035	MIMAT0004935	MIMAT0004935	chr4	94665206	94665227	+_x000D_
mmu-miR-8112	224.069	-0.908503	0.387543	2.34426	0.0190649	0.0688453	MIMAT0031418	MIMAT0031418	chr6	71271745	71271764	+_x000D_
mmu-miR-708-3p	233.245	-0.921261	0.413568	2.22759	0.0259076	0.0886313	MIMAT0003498	MIMAT0003498	chr7	96249496	96249517	+_x000D_
mmu-miR-3068-3p	900.317	-0.927596	0.333934	2.77778	0.00547313	0.0247481	MIMAT0014843	MIMAT0014843	chr12	87437685	87437706	-_x000D_
mmu-miR-330-5p	2605.67	-0.936906	0.30583	3.06349	0.00218774	0.0119374	MIMAT0004642	MIMAT0004642	chr7	19181486	19181507	+_x000D_
mmu-miR-30c-1-3p	525.734	-0.956984	0.328303	2.91494	0.00355753	0.0177877	MIMAT0004616	MIMAT0004616	chr4	120769546	120769567	-_x000D_
mmu-miR-18a-3p	367.897	-0.961871	0.345726	2.78218	0.00539958	0.0246297	MIMAT0004626	MIMAT0004626	chr14	115043908	115043929	+_x000D_
mmu-miR-185-5p	4743.15	-0.965346	0.317883	3.03679	0.00239109	0.0125593	MIMAT0000214	MIMAT0000214	chr16	18327438	18327459	-_x000D_
mmu-miR-484	7644.06	-0.971268	0.333559	2.91183	0.00359313	0.0177945	MIMAT0003127	MIMAT0003127	chr16	14159630	14159651	+_x000D_
mmu-miR-331-3p	1244.98	-0.989452	0.308957	3.20256	0.00136212	0.00787005	MIMAT0000571	MIMAT0000571	chr10	93963783	93963803	-_x000D_
mmu-miR-31-5p	9994.49	-0.99681	0.338552	2.94434	0.00323648	0.0166339	MIMAT0000538	MIMAT0000538	chr4	88910614	88910635	-_x000D_
mmu-miR-326-3p	416.774	-1.02693	0.362781	2.8307	0.00464462	0.0219564	MIMAT0000559	MIMAT0000559	chr7	99552328	99552348	+_x000D_
mmu-miR-671-5p	455.802	-1.06369	0.382295	2.78239	0.00539601	0.0246297	MIMAT0003731	MIMAT0003731	chr5	24592132	24592154	+_x000D_
mmu-miR-425-3p	823.543	-1.0865	0.322544	3.36855	0.000755642	0.00485104	MIMAT0001342	MIMAT0001342	chr9	108568830	108568850	+_x000D_
mmu-miR-29a-3p	28391.2	-1.1412	0.342645	3.33057	0.000866674	0.00536513	MIMAT0000535	MIMAT0000535	chr6	31062673	31062694	-_x000D_
mmu-miR-30a-5p	429835	-1.14452	0.298713	3.83149	0.000127369	0.00102814	MIMAT0000128	MIMAT0000128	chr1	23272274	23272295	+_x000D_
mmu-miR-455-5p	2099.92	-1.15142	0.300688	3.82928	0.000128517	0.00102814	MIMAT0003485	MIMAT0003485	chr4	63256867	63256888	+_x000D_
mmu-miR-677-5p	505.302	-1.18935	0.597316	1.99116	0.0464637	0.138857	MIMAT0003451	MIMAT0003451	chr10	128085291	128085312	+_x000D_
mmu-miR-29b-3p	672.744	-1.2063	0.375231	3.21481	0.0013053	0.00762648	MIMAT0000127	MIMAT0000127	chr1	195037091	195037113	+_x000D_
mmu-miR-6933-5p	64.4695	-1.23601	0.559882	2.20763	0.0272703	0.0914874	MIMAT0027766	MIMAT0027766	chr11	118002279	118002300	+_x000D_
mmu-miR-877-3p	432.983	-1.25087	0.392982	3.18304	0.00145739	0.00832794	MIMAT0004862	MIMAT0004862	chr17	35960731	35960752	-_x000D_
mmu-miR-34a-5p	2275.3	-1.2548	0.403008	3.11359	0.00184825	0.0102243	MIMAT0000542	MIMAT0000542	chr4	150068473	150068494	+_x000D_
mmu-miR-339-3p	495.84	-1.28868	0.33775	3.81549	0.000135912	0.00107082	MIMAT0004649	MIMAT0004649	chr5	139369673	139369695	-_x000D_
mmu-miR-30e-5p	33802.9	-1.30834	0.313413	4.17448	2.98666e-05	0.000282375	MIMAT0000248	MIMAT0000248	chr4	120772660	120772681	-_x000D_
mmu-miR-455-3p	1489.41	-1.3344	0.317684	4.20038	2.66463e-05	0.000256594	MIMAT0003742	MIMAT0003742	chr4	63256904	63256924	+_x000D_
mmu-miR-3068-5p	847.265	-1.37658	0.325058	4.23488	2.28675e-05	0.00022436	MIMAT0014842	MIMAT0014842	chr12	87437724	87437747	-_x000D_
mmu-miR-194-5p	890.735	-1.39874	0.433676	3.22531	0.00125837	0.00745597	MIMAT0000224	MIMAT0000224	chr1	185313325	185313346	+_x000D_
mmu-miR-3102-3p	142.901	-1.41039	0.447171	3.15403	0.00161031	0.00907714	MIMAT0014936	MIMAT0014936	chr7	100882307	100882329	-_x000D_
mmu-miR-1194	64.07	-1.47329	0.584294	2.52149	0.0116858	0.0471054	NA	NA	NA	NA	NA	NA_x000D_
mmu-miR-449a-5p	60.3764	-1.48173	0.59143	2.50533	0.0122338	0.0485287	MIMAT0001542	MIMAT0001542	chr13	113037549	113037570	+_x000D_
mmu-miR-29c-3p	122.686	-1.51535	0.582186	2.60286	0.00924492	0.0381536	MIMAT0000536	MIMAT0000536	chr1	195037600	195037621	+_x000D_
mmu-miR-297a-5p	61.074	-1.51806	0.5574	2.72347	0.00645994	0.0282283	MIMAT0000375	MIMAT0000375	chr2	10472264	10472285	+_x000D_
mmu-miR-193a-3p	45.0321	-1.52656	0.639276	2.38795	0.0169426	0.0621108	MIMAT0000223	MIMAT0000223	chr11	79712009	79712030	+_x000D_
mmu-miR-466i-3p	85.345	-1.59083	0.544317	2.92262	0.00347101	0.0175235	MIMAT0005834	MIMAT0005834	chr13	17747552	17747573	+_x000D_
mmu-miR-301b-3p	84.6116	-1.59413	0.557405	2.85992	0.00423751	0.0205935	MIMAT0004186	MIMAT0004186	chr16	17124420	17124442	-_x000D_
mmu-miR-339-5p	2966.5	-1.60032	0.39562	4.04509	5.23037e-05	0.000460982	MIMAT0000584	MIMAT0000584	chr5	139369708	139369730	-_x000D_
mmu-miR-99a-3p	49.8012	-1.6731	0.635551	2.63252	0.00847546	0.0358312	MIMAT0016981	MIMAT0016981	chr16	77598977	77598997	+_x000D_
mmu-miR-17-3p	771.146	-1.67958	0.384519	4.36802	1.25378e-05	0.000135827	MIMAT0000650	MIMAT0000650	chr14	115043721	115043742	+_x000D_
mmu-let-7d-3p	17703.5	-1.68157	0.334307	5.03001	4.90453e-07	7.72835e-06	MIMAT0000384	MIMAT0000384	chr13	48536024	48536045	-_x000D_
mmu-miR-466h-3p	276.312	-1.68162	0.455937	3.68828	0.000225777	0.00170151	MIMAT0017274	MIMAT0017274	chr2	10514940	10514958	+_x000D_
mmu-miR-3057-3p	28.2636	-1.70166	0.774213	2.19792	0.0279547	0.0931824	MIMAT0014823	MIMAT0014823	chr10	81271654	81271675	+_x000D_
mmu-miR-7224-3p	25.6089	-1.7146	0.76632	2.23745	0.0252569	0.0875574	MIMAT0028417	MIMAT0028417	chr2	67675496	67675516	+_x000D_
mmu-miR-92a-1-5p	324.779	-1.7283	0.350319	4.93352	8.07625e-07	1.13504e-05	MIMAT0017066	MIMAT0017066	chr14	115044437	115044459	+_x000D_
mmu-miR-345-5p	1072.24	-1.79806	0.340286	5.28398	1.26409e-07	2.26664e-06	MIMAT0000595	MIMAT0000595	chr12	108836989	108837010	+_x000D_
mmu-miR-466f-3p	740.212	-1.86727	0.416395	4.48438	7.31246e-06	8.44995e-05	MIMAT0004882	MIMAT0004882	chr2	10466998	10467018	+_x000D_
mmu-miR-3535	6584.34	-1.93122	0.302657	6.38089	1.76061e-10	4.35962e-09	MIMAT0031410	MIMAT0031410	chr1	86352062	86352087	-_x000D_
mmu-miR-5121	64.0455	-2.03203	0.630179	3.22453	0.00126178	0.00745597	MIMAT0020629	MIMAT0020629	chr7	45126925	45126945	-_x000D_
mmu-miR-187-3p	1295.56	-2.03286	0.370175	5.49163	3.98252e-08	7.96504e-07	MIMAT0000216	MIMAT0000216	chr18	24429110	24429131	-_x000D_
mmu-miR-1249-3p	777.915	-2.0422	0.396639	5.14878	2.62189e-07	4.54461e-06	MIMAT0010560	MIMAT0010560	chr15	84951545	84951566	-_x000D_
mmu-miR-193b-3p	35.1232	-2.11925	0.880664	2.40642	0.0161097	0.0602664	MIMAT0004859	MIMAT0004859	chr16	13449570	13449591	+_x000D_
mmu-miR-31-3p	884.035	-2.13294	0.454952	4.68828	2.75516e-06	3.49435e-05	MIMAT0004634	MIMAT0004634	chr4	88910577	88910599	-_x000D_
mmu-miR-702-3p	42.8741	-2.14908	0.703678	3.05406	0.00225766	0.0119794	MIMAT0003492	MIMAT0003492	chr5	136991520	136991541	+_x000D_
mmu-miR-324-5p	537.107	-2.23083	0.416686	5.35374	8.61534e-08	1.59999e-06	MIMAT0000555	MIMAT0000555	chr11	70012060	70012082	+_x000D_
mmu-let-7a-2-3p	16.99	-2.26013	0.991977	2.27841	0.0227023	0.0808574	MIMAT0017015	MIMAT0017015	chr9	41536777	41536797	+_x000D_
mmu-miR-350-3p	4594.99	-2.28726	0.390061	5.86386	4.52237e-09	1.02245e-07	MIMAT0000605	MIMAT0000605	chr1	176772342	176772363	-_x000D_
mmu-miR-1956	14.4433	-2.28859	1.10886	2.06392	0.0390256	0.120793	MIMAT0009428	MIMAT0009428	chr3	138526425	138526446	+_x000D_
mmu-miR-5100	17.3326	-2.32239	0.951448	2.4409	0.0146506	0.0552052	MIMAT0020607	MIMAT0020607	chr11	60728698	60728718	+_x000D_
mmu-miR-1949	21.5538	-2.67957	1.07979	2.48156	0.0130809	0.0507617	MIMAT0009416	MIMAT0009416	chr18	35554612	35554635	+_x000D_
mmu-miR-491-5p	27.6584	-2.97595	0.844767	3.5228	0.00042701	0.00297019	MIMAT0003486	MIMAT0003486	chr4	88122057	88122078	+_x000D_
mmu-miR-1895	10.1841	-3.38617	1.29592	2.61294	0.00897672	0.0373432	MIMAT0007867	MIMAT0007867	chr3	134240515	134240536	-_x000D_
mmu-miR-1291	3058.79	-4.1361	0.374795	11.0356	2.5725e-28	6.6885e-26	MIMAT0031397	MIMAT0031397	chr15	98519828	98519853	-_x000D_
mmu-miR-6239	361.851	-4.1711	1.4753	2.82729	0.00469441	0.0219918	MIMAT0024860	MIMAT0024860	chr14	117953768	117953787	-_x000D_
mmu-miR-6238	675.831	-4.17338	1.93268	2.15938	0.0308211	0.0995026	MIMAT0024859	MIMAT0024859	chr7	53891796	53891817	-_x000D_
mmu-miR-6538	43.8528	-4.39132	2.03577	2.15709	0.0309989	0.0995026	MIMAT0025583	MIMAT0025583	chr12	26414970	26414988	-_x000D_
mmu-miR-6240	665.72	-4.44644	1.95585	2.27341	0.0230017	0.0813666	MIMAT0024861	MIMAT0024861	chr5	114851973	114851998	+_x000D_
mmu-miR-6937-5p	40.173	-5.10677	1.29552	3.94186	8.08517e-05	0.000678111	MIMAT0027774	MIMAT0027774	chr12	28679325	28679348	+_x000D_
mmu-miR-712-5p	2.95359	-5.14831	2.61446	1.96916	0.0489342	NA	NA	NA	NA	NA	NA	NA_x000D_

## Sheet: S3. ADC106 David Up
Supplemental Table S3. Gene ontology analysis of enoxacin upregulated genes in ADC106 cells. DAVID gene ontology of increased genes in cells treated with enx compared to DMS with FDR<0.05 and log2 fold change >0.5 (720 genes).
Category	Term	Clean Term	Count	%	PValue	Genes	List Total	Pop Hits	Pop Total	Fold Enrichment	Bonferroni	Benjamini	FDR	Fold Enrichment
GOTERM_BP_FAT	GO:0035556~intracellular signal transduction	Intracellular Signal Transduction	99	14.2037	4.43401e-09	RB1, DGKE, GUCY1B1, CLPB, WWC2, CLU, RPS6KA5, DEPTOR, SESN2, PIM1, CCN2, CHAC1, PDK2, PDK1, PRKCG, GUCY1A2, DAPK1, RALGAPA2, GM14137, ATP1B1, SIK1, RPL26, LETMD1, ATF6, NYAP1, INSIG2, ARL3, PSEN2, MTM1, SOCS3, PPARGC1B, CCR10, ESRRA, SMAD2, BTN2A2, GADD45A, TNFRSF10B, NR1D1, NFKBIA, RCAN1, BCL2, PDE3A, AMOTL2, SCN2A, MAP3K13, BCL2L2, DOCK5, CDKN1A, THRA, ADM, ARHGEF10L, GRIK2, RND1, HERPUD1, SMPD…	621	1774	20369	1.83046	2.79605e-05	2.79609e-05	2.70785e-05	1.83046
GOTERM_BP_FAT	GO:0030334~regulation of cell migration	Regulation Of Cell Migration	66	9.46915	7.20042e-08	DOCK5, ITGB3, NEXMIF, SERPINE1, LAMC2, CIB1, SYDE1, DUSP10, GLIPR2, DPYSL3, EMILIN2, CCN1, JAK2, GPSM3, PRKG1, ARPIN, ITGA4, SPNS2, RRAS2, GP1BA, MITF, GAB2, PGF, CD200R1, PKP2, CD47, PLCB1, RAPGEF3, TLR2, HBEGF, CD274, GRN, SEMA3C, SYNPO2, LAMA3, CXCR4, SEMA3E, PTGS2, THBS1, PAK1, SRPX2, TERT, PERP, PDGFD, MGAT3, PTK2B, PLXNA4, CARMIL1, CARMIL2, ANGPT2, GADD45A, MEAK7, SEMA4G, MCC, LYVE1, BST2, …	621	1065	20369	2.0327	0.000453955	0.000153214	0.000148379	2.0327
GOTERM_BP_FAT	GO:0043068~positive regulation of programmed cell death	Positive Regulation Of Programmed Cell Death	49	7.03013	7.69729e-08	CDKN1A, NCF2, ZFAS1, ADM, GRIK2, CLU, SMPD2, RASSF6, ANKRD1, EMILIN2, CCN2, CCN1, JAK2, ITGA4, SYK, DAPK1, ITGA1, TMC8, CDC34, ALDH1A1, EFHC1, SIK1, CD47, RPL26, EEF1E1, ATF6, CD274, GRN, H2-M3, PSEN2, ADRB2, PTGS2, THBS1, PERP, ATG7, WWOX, NOS2, GADD45A, TGFB3, SORT1, TNFRSF10B, CCK, SEPTIN4, POMC, BCL2, FAS, F2RL1, SPRY1, BCL2L2	621	685	20369	2.3463	0.000485274	0.000153214	0.000148379	2.3463
GOTERM_BP_FAT	GO:0042127~regulation of cell population proliferation	Regulation Of Cell Population Proliferation	99	14.2037	9.71862e-08	IFITM3, RB1, SERPINE1, WWC2, CIB1, CLU, PIM1, CDK20, FBXO4, LEPR, CCN2, CCN1, TPD52, OSR1, P3H2, MITF, LIFR, OVOL1, PGF, EREG, PKP2, ZFPM2, CD274, H2-M3, ADRB2, PRDX3, TERT, PDGFD, ZBTB7B, ESRRA, SMAD2, CARMIL2, FZD5, BTN2A2, TGFB3, TRPV2, NR1D1, MCC, NFKBIA, CDK6, LIN28A, BCL2, MNAT1, CDKN1A, BTG2, ITGB3, ZFAS1, TNFAIP3, ADM, LAMC2, SIGLECG, DUSP10, SIX4, CTSL, TIMP3, EMILIN2, JAK2, IFT57, PTPRV…	621	1888	20369	1.71993	0.000612668	0.000153214	0.000148379	1.71993
GOTERM_BP_FAT	GO:0043067~regulation of programmed cell death	Regulation Of Programmed Cell Death	95	13.6298	1.61648e-07	RB1, CDKN1A, BTG2, DYRK3, THRA, NCF2, ITGB3, ZFAS1, SERPINE1, SRA1, TNFAIP3, ADM, SLC2A3, CIB1, GRIK2, TM7SF3, YBX3, CLU, HERPUD1, RNF157, SMPD2, DEPTOR, SIX4, RASSF6, PIM1, ANKRD1, EMILIN2, PIM3, CCN2, CCN1, IFT57, JAK2, PRKCG, SERPINB2, ITGA4, SYK, DAPK1, OSR1, ITGA1, TMC8, MITF, LIFR, PCP4, CDC34, ALDH1A1, EFHC1, SIK1, TNFRSF26, CD47, RPL26, EEF1E1, CRYAB, ATF6, RAPGEF3, CD274, CEBPB, GRN, PHL…	621	1805	20369	1.72633	0.00101883	0.00020387	0.000197437	1.72633
GOTERM_BP_FAT	GO:2000145~regulation of cell motility	Regulation Of Cell Motility	67	9.61263	2.69002e-07	DOCK5, ITGB3, NEXMIF, SERPINE1, LAMC2, CIB1, SYDE1, DUSP10, GLIPR2, DPYSL3, EMILIN2, CCN1, JAK2, GPSM3, PRKG1, ARPIN, BBS4, ITGA4, SPNS2, RRAS2, GP1BA, MITF, GAB2, PGF, CD200R1, PKP2, CD47, PLCB1, RAPGEF3, TLR2, HBEGF, CD274, GRN, SEMA3C, SYNPO2, LAMA3, CXCR4, SEMA3E, PTGS2, THBS1, PAK1, SRPX2, TERT, PERP, PDGFD, MGAT3, PTK2B, PLXNA4, CARMIL1, CARMIL2, ANGPT2, GADD45A, MEAK7, SEMA4G, MCC, LYVE1, …	621	1129	20369	1.94652	0.00169489	0.000282721	0.000273799	1.94652
GOTERM_BP_FAT	GO:1901700~response to oxygen-containing compound	Response To Oxygen-Containing Compound	102	14.6341	3.79103e-07	RB1, GUCY1B1, NCF1, NCF2, SERPINE1, GRIP1, CRHBP, IL18RAP, GRB14, SESN2, PIM1, HOXA2, HOXA1, PSPH, PDK2, PRKCG, DAPK1, OSR1, EREG, SHPK, LETMD1, LY6E, CD274, PFKFB1, FAM114A1, INSIG2, ADRB2, EFNA5, PRDX3, BLOC1S6, BRINP1, RDH12, PDGFD, NPTX1, ZBTB7B, ATG7, PPARGC1B, PCK2, SMAD2, GOT1, TGFB3, NR1D1, RAET1A, NFKBIA, LIN28A, DLG4, BCL2, PDE3A, GNB5, CPEB2, BCL2L2, CDKN1A, BTG2, ITGB3, TNFAIP3, ADM, …	621	2023	20369	1.6538	0.00238777	0.000300626	0.000291139	1.6538
GOTERM_BP_FAT	GO:0008285~negative regulation of cell population proliferation	Negative Regulation Of Cell Population Proliferation	51	7.31707	3.81384e-07	RB1, IFITM3, CDKN1A, BTG2, ZFAS1, WWC2, TNFAIP3, ADM, CIB1, DUSP10, CTSL, FBXO4, TIMP3, IFT57, JAK2, PRKG1, PTPRV, KLF13, IL15, ITGA1, P3H2, OVOL1, EREG, PKP2, EEF1E1, TLR2, CD274, CEBPB, H2-M3, PTGS2, TOB1, THBS1, IL1RL1, PAK1, TERT, PTK2B, ZBTB7B, SMAD2, FZD5, BTN2A2, TGFB3, TRPV2, SEPTIN4, LILRB4A, MCC, CDK6, KLF9, BCL2, FAS, SPRY1, FOXA3	621	768	20369	2.17815	0.00240212	0.000300626	0.000291139	2.17815
GOTERM_BP_FAT	GO:0040012~regulation of locomotion	Regulation Of Locomotion	68	9.7561	6.01263e-07	DOCK5, ITGB3, NEXMIF, SERPINE1, LAMC2, CIB1, SYDE1, DUSP10, GLIPR2, DPYSL3, EMILIN2, CCN1, JAK2, GPSM3, PRKG1, ARPIN, BBS4, ITGA4, SPNS2, RRAS2, GP1BA, MITF, GAB2, PTGR1, PGF, CD200R1, PKP2, CD47, PLCB1, RAPGEF3, TLR2, HBEGF, CD274, GRN, SEMA3C, SYNPO2, LAMA3, CXCR4, SEMA3E, PTGS2, THBS1, PAK1, SRPX2, TERT, PERP, PDGFD, MGAT3, PTK2B, PLXNA4, CARMIL1, CARMIL2, ANGPT2, GADD45A, MEAK7, SEMA4G, MCC, …	621	1178	20369	1.8934	0.00378439	0.000421285	0.00040799	1.8934
GOTERM_BP_FAT	GO:0007166~cell surface receptor signaling pathway	Cell Surface Receptor Signaling Pathway	104	14.9211	9.30091e-07	IFITM3, RB1, GALNT11, ZFYVE9, DIXDC1, CIB1, IL18RAP, RPS6KA5, GRB14, LEPR, CCN2, CHAC1, SAMD12, PDK2, PDK1, IL15RA, DAPK1, FST, ARID5B, MITF, LIFR, PGF, EREG, ADGRB3, COL4A5, LETMD1, BEX3, CD274, ARL3, H2-M3, PSEN2, ADRB2, EFNA5, SOCS3, PDGFD, PLXNA4, CCR10, SMAD2, CARMIL2, FZD5, GOT1, BTN2A2, TGFB3, TIPARP, GPR108, TNFRSF10B, TMEM231, VIL1, NFKBIA, CDK6, DLG4, BCL2, CASS4, AMOTL2, BCL2L2, FERMT3…	621	2114	20369	1.61364	0.00584799	0.000586515	0.000568006	1.61364
GOTERM_BP_FAT	GO:0042981~regulation of apoptotic process	Regulation Of Apoptotic Process	90	12.9125	1.12247e-06	RB1, CDKN1A, BTG2, DYRK3, THRA, NCF2, ITGB3, ZFAS1, SERPINE1, SRA1, TNFAIP3, ADM, SLC2A3, CIB1, GRIK2, YBX3, CLU, HERPUD1, RNF157, SMPD2, DEPTOR, SIX4, RASSF6, PIM1, ANKRD1, EMILIN2, PIM3, CCN2, CCN1, IFT57, JAK2, PRKCG, SERPINB2, ITGA4, DAPK1, OSR1, ITGA1, TMC8, MITF, LIFR, PCP4, CDC34, ALDH1A1, EFHC1, SIK1, TNFRSF26, CD47, RPL26, EEF1E1, CRYAB, ATF6, RAPGEF3, CD274, CEBPB, GRN, PHLPP1, H2-M3, P…	621	1755	20369	1.68207	0.00705329	0.00064348	0.000623173	1.68207
GOTERM_BP_FAT	GO:0043065~positive regulation of apoptotic process	Positive Regulation Of Apoptotic Process	45	6.45624	1.36024e-06	CD274, GRN, NCF2, ZFAS1, H2-M3, PSEN2, ADM, GRIK2, ADRB2, PTGS2, THBS1, CLU, SMPD2, PERP, RASSF6, ANKRD1, EMILIN2, CCN2, JAK2, CCN1, ATG7, WWOX, NOS2, ITGA4, DAPK1, GADD45A, TGFB3, SORT1, ITGA1, TMC8, TNFRSF10B, CCK, SEPTIN4, CDC34, ALDH1A1, EFHC1, BCL2, FAS, SIK1, SPRY1, RPL26, CD47, EEF1E1, ATF6, BCL2L2	621	666	20369	2.21624	0.00854097	0.000714804	0.000692246	2.21624
GOTERM_BP_FAT	GO:0048468~cell development	Cell Development	127	18.2209	2.28106e-06	TDRKH, RB1, RAB3A, CLPB, CIB1, CLU, GRIP1, KIF5C, DPYSL3, LEPR, HOXA2, HOXA1, MAGI1, TPD52, IL15RA, CDKL3, GRCC10, OSR1, FST, ARID5B, MITF, LIFR, EREG, ADGRB3, TCTA, NYAP1, ARHGEF28, ARL3, PSEN2, EFNA5, PRDX3, BLOC1S6, BRINP1, NPTX1, ZBTB7B, ATG7, ST3GAL1, PLXNA4, FZD5, TIPARP, TDRD5, FANCG, RCAN1, CDK6, LIN28A, UQCRQ, DLG4, BCL2, PDE3A, AMOTL2, RADIL, ITM2A, CLIC5, SNAP25, CDKN1A, CNTNAP1, DYRK3…	621	2786	20369	1.4952	0.0142814	0.00108581	0.00105155	1.4952
GOTERM_BP_FAT	GO:0050790~regulation of catalytic activity	Regulation Of Catalytic Activity	61	8.75179	2.41063e-06	RB1, CDKN1A, ITGB3, SERPINE1, TNFAIP3, CIB1, C1QTNF9, ARHGAP6, SYDE1, DEPTOR, DUSP10, SESN2, PIM1, LEPR, TIMP3, MMUT, CCN1, JAK2, PRKG1, BBS4, TBC1D10B, SYK, RALGAPA1, S100A1, RALGAPA2, APOA2, EREG, TBC1D2, PSRC1, NEIL1, RAPGEF3, CSTB, GRN, RGS16, SYNPO2, PSEN2, ADRB2, EFNA5, THBS1, FGD2, PRDX3, PAK1, TERT, PTK2B, PPARGC1B, HEXIM2, FZD5, GADD45A, SORT1, LILRB4A, LRCH1, FABP4, SGSM2, BCL2, CASS4, …	621	1054	20369	1.89831	0.0150865	0.00108581	0.00105155	1.89831
GOTERM_BP_FAT	GO:0051094~positive regulation of developmental process	Positive Regulation Of Developmental Process	82	11.7647	2.99529e-06	RB1, THRA, ITGB3, SERPINE1, DIXDC1, ADM, METRNL, YBX3, CLU, RNF157, SYDE1, GRIP1, DUSP10, SIX4, GLIPR2, PPP1R13L, BOC, PIM1, CDK20, EMILIN2, CCN2, CCN1, JAK2, ZFP365, BBS4, CD53, IL15RA, CDKL3, UNC13A, SYK, ZFP219, IL15, S100A1, OSR1, FST, PGF, FAM210B, PCP4, NR5A2, ADGRB3, ZFPM2, PLCB1, RAPGEF3, TLR2, CEBPB, GRN, H2-M3, CXCR4, CREBL2, ADRB2, PTGS2, EFNA5, THBS1, MTM1, SOCS3, BLOC1S6, PAK1, BRINP…	621	1589	20369	1.69265	0.0187111	0.00125922	0.00121948	1.69265
GOTERM_BP_FAT	GO:0002682~regulation of immune system process	Regulation Of Immune System Process	90	12.9125	3.57122e-06	RB1, CDKN1A, CLPB, NCF1, ITGB3, SERPINE1, TNFAIP3, CIB1, LYST, SIGLECG, TRIM6, IL18RAP, DUSP10, PDE4B, PIM1, FLOT2, JAK2, GPSM3, IL15RA, KLF13, ITGA4, SYK, IL15, ZFP3, SPNS2, APOA2, ZDHHC12, GP1BA, MITF, GAB2, PGF, EREG, FAM210B, CD200R1, NR5A2, SHPK, LCP2, TCTA, MASP1, CD47, LETMD1, HOXB8, PLCB1, TLR2, CD274, CEBPB, GRN, PHLPP1, UNC93B1, H2-M3, PSEN2, THBS1, FSTL3, IL1RL1, BLOC1S6, HLX, PERP, PD…	621	1805	20369	1.63547	0.0222684	0.00128103	0.00124061	1.63547
GOTERM_BP_FAT	GO:0070887~cellular response to chemical stimulus	Cellular Response To Chemical Stimulus	111	15.9254	3.57504e-06	RB1, GUCY1B1, NCF1, NCF2, SERPINE1, CYP46A1, GRIP1, CRHBP, IL18RAP, GRB14, SESN2, PIM1, LEPR, HOXA2, HOXA1, PDK2, PDK1, DAPK1, OSR1, SHPK, LY6E, CD274, FAM114A1, INSIG2, ADRB2, EFNA5, PRDX3, BRINP1, RDH12, TERT, PDGFD, NPTX1, ATG7, PLXNA4, PPARGC1B, CCR10, PCK2, ESRRA, SMAD2, GSTM1, GOT1, SLC4A11, PYCR1, PYCR2, NR1D1, RAET1A, NFKBIA, NCEH1, LIN28A, DLG4, BCL2, PDE3A, GNB5, CPEB3, SCN2A, CPEB2, BC…	621	2368	20369	1.53752	0.022292	0.00128103	0.00124061	1.53752
GOTERM_BP_FAT	GO:0120161~regulation of cold-induced thermogenesis	Regulation Of Cold-Induced Thermogenesis	18	2.5825	3.6711e-06	RB1, CEBPB, SYK, THRA, IL15, PLCL1, TRPV2, CXCR4, LNPEP, ADRB2, NR1D1, FABP4, ALDH1A1, LEPR, JAK2, ZBTB7B, LETMD1, PPARGC1B	621	151	20369	3.90997	0.0228841	0.00128103	0.00124061	3.90997
GOTERM_BP_FAT	GO:0009725~response to hormone	Response To Hormone	58	8.32138	3.96176e-06	RB1, CDKN1A, BTG2, THRA, NCF2, ITGB3, SRA1, ADM, CRHBP, GRB14, CTSL, SESN2, PIM1, LEPR, TIMP3, JAK2, PDK2, PTPRV, BBS4, PRKCG, VPS13C, EREG, NR5A2, PLCB1, TLR2, PFKFB1, FAM114A1, INSIG2, ATP1A3, PTGS2, EFNA5, PAK1, PTK2B, ZBTB7B, PPARGC1B, PCK2, ESRRA, NOS2, GOT1, TGFB3, SORT1, STAT2, MEAK7, LNPEP, NR1D1, MERTK, ASS1, TBX2, POMC, RCAN1, KLF9, RAB13, BCL2, PDE3A, FAS, SLC25A33, CPEB2, PLCD1	621	999	20369	1.90432	0.0246734	0.00128103	0.00124061	1.90432
GOTERM_BP_FAT	GO:0009719~response to endogenous stimulus	Response To Endogenous Stimulus	76	10.9039	4.10647e-06	RB1, CDKN1A, BTG2, THRA, NCF2, ZFYVE9, ITGB3, SERPINE1, SRA1, ADM, CIB1, GRIP1, CRHBP, GRB14, CTSL, SESN2, PIM1, LEPR, ANKRD1, TIMP3, CCN2, JAK2, PDK2, PTPRV, BBS4, PRKCG, SYK, VPS13C, FST, PGF, EREG, NR5A2, FEZ1, PLCB1, TLR2, PFKFB1, FAM114A1, INSIG2, ATP1A3, PTGS2, EFNA5, THBS1, BLOC1S6, PAK1, PDGFD, PTK2B, ZBTB7B, PPARGC1B, PCK2, ESRRA, SMAD2, WWOX, ANGPT2, NOS2, GOT1, TGFB3, SORT1, STAT2, MEA…	621	1447	20369	1.72275	0.0255631	0.00128103	0.00124061	1.72275
GOTERM_BP_FAT	GO:1901701~cellular response to oxygen-containing compound	Cellular Response To Oxygen-Containing Compound	73	10.4735	4.26604e-06	RB1, BTG2, GUCY1B1, NCF1, ITGB3, SERPINE1, TNFAIP3, GRIP1, CRHBP, IL18RAP, GRB14, SESN2, PDE4B, PIM1, ANKRD1, HOXA2, HOXA1, JAK2, PDK2, PTPRV, ITGA4, SYK, DAPK1, OSR1, FAM210B, SHPK, ALDH1A1, PLCB1, RAPGEF3, TLR2, LY6E, CD274, CEBPB, CCDC186, FAM114A1, INSIG2, ATP1A3, ADRB2, PTGS2, EFNA5, THBS1, PRDX3, PAK1, BRINP1, RDH12, STAMBPL1, PDGFD, PTK2B, NPTX1, ATG7, PPARGC1B, PCK2, SMAD2, NOS2, GOT1, PE…	621	1373	20369	1.74394	0.0265431	0.00128103	0.00124061	1.74394
GOTERM_BP_FAT	GO:0030335~positive regulation of cell migration	Positive Regulation Of Cell Migration	42	6.02582	4.50681e-06	DOCK5, CD274, GRN, SEMA3C, ITGB3, SYNPO2, SERPINE1, CXCR4, LAMC2, CIB1, SEMA3E, PTGS2, THBS1, SYDE1, PAK1, SRPX2, TERT, GLIPR2, PDGFD, PERP, PTK2B, JAK2, CCN1, GPSM3, CARMIL1, CARMIL2, ITGA4, RRAS2, SEMA4G, GAB2, LYVE1, PGF, VIL1, BCL2, CASS4, F2RL1, CD47, LGR6, RAPGEF3, FERMT3, TLR2, HBEGF	621	630	20369	2.18669	0.02802	0.00129182	0.00125105	2.18669
GOTERM_BP_FAT	GO:0051240~positive regulation of multicellular organismal process	Positive Regulation Of Multicellular Organismal Process	95	13.6298	5.19421e-06	RB1, CDKN1A, THRA, ITGB3, SERPINE1, DIXDC1, ADM, CIB1, YBX3, LYST, CLU, SYDE1, GRIP1, TRIM6, DUSP10, SIX4, GLIPR2, PDE4B, PIM1, CDK20, LEPR, FLOT2, EMILIN2, CCN2, CCN1, FGFBP3, JAK2, ZFP365, GPSM3, BBS4, VKORC1, IL15RA, CDKL3, SYK, ZFP219, IL15, S100A1, OSR1, FST, APOA2, GP1BA, PGF, EREG, SYTL2, NR5A2, RUFY4, ADGRB3, CD47, LETMD1, ZFPM2, PLCB1, RAPGEF3, TLR2, CD274, CEBPB, GRN, UNC93B1, H2-M3, PS…	621	1955	20369	1.59388	0.0322242	0.00142032	0.0013755	1.59388
GOTERM_BP_FAT	GO:0045595~regulation of cell differentiation	Regulation Of Cell Differentiation	92	13.1994	5.40561e-06	RB1, BTG2, THRA, ITGB3, SERPINE1, BHLHE41, DIXDC1, SRA1, ADM, CIB1, METRNL, CLU, GRIP1, TRIM6, DUSP10, GRB14, SIX4, GLIPR2, PPP1R13L, BOC, PIM1, HOXA2, FLOT2, CCN2, CCN1, JAK2, ZFP365, IL15RA, CDKL3, KLF13, SYK, ZFP219, IL15, OSR1, FST, MITF, EREG, FAM210B, PCP4, NR5A2, PKP2, SIK1, TCTA, HOXB8, ZFPM2, PLCB1, JDP2, TLR2, CEBPB, GRN, H2-M3, CXCR4, CREBL2, PTGS2, EFNA5, TOB1, FSTL3, SOCS3, BLOC1S6, …	621	1876	20369	1.60854	0.0335134	0.00142032	0.0013755	1.60854
GOTERM_BP_FAT	GO:0051241~negative regulation of multicellular organismal process	Negative Regulation Of Multicellular Organismal Process	69	9.89957	7.49743e-06	RB1, DOCK5, BTG2, ZFAS1, WWC2, SERPINE1, TNFAIP3, ADM, YBX3, CRHBP, DUSP10, PDE4B, LEPR, JAK2, PRKG1, CDKL3, ITGA4, IL15, SLC2A10, OSR1, APOA2, GP1BA, PROCR, CD200R1, NR5A2, RNF128, TNNT1, ADGRB3, ALDH1A1, TCTA, ZFPM2, TLR2, CD274, CEBPB, GRN, H2-M3, SEMA3E, ADRB2, PTGS2, THBS1, FSTL3, IL1RL1, PAK1, BRINP1, TERT, HLX, PTK2B, ZBTB7B, SMAD2, ANGPT2, BTN2A2, GADD45A, TGFB3, PLCL1, TNFRSF10B, CCK, LN…	621	1294	20369	1.74901	0.0461787	0.00189115	0.00183147	1.74901
GOTERM_BP_FAT	GO:0019752~carboxylic acid metabolic process	Carboxylic Acid Metabolic Process	50	7.1736	1.12735e-05	NCF1, HIBADH, C1QTNF9, MPC1, SESN2, DBT, MMUT, PSPH, GATD1, THA1, SYK, GPT2, ELOVL7, HOGA1, PTGR1, THNSL2, FAHD2A, NR5A2, MTHFD2, ALDH1A1, TLR2, GALT, ODC1, ATP1A3, PPM1K, PTGS2, BLOC1S6, PRKAR2B, DGLUCY, HACL1, PCBD1, ST3GAL1, CBR4, PCK2, GSTM1, NOS2, GOT1, PYCR1, PYCR2, ACADSB, MCAT, ASS1, ALDH6A1, GNPDA1, AMACR, FABP4, DHRS9, UST, ECHDC2, ECHDC3	621	841	20369	1.95008	0.068623	0.00273426	0.00264797	1.95008
GOTERM_BP_FAT	GO:0032956~regulation of actin cytoskeleton organization	Regulation Of Actin Cytoskeleton Organization	29	4.16069	1.17794e-05	RNH1, ITGB3, SYNPO2, GMFG, DIXDC1, CAPG, ARHGEF10L, EFNA5, IQGAP2, ARHGAP6, RND1, PAK1, BAIAP2L1, PTK2B, CCN2, ARPIN, BBS4, CARMIL1, CARMIL2, TGFB3, GM14137, VIL1, BST2, CDC42EP5, CDC42EP3, F2RL1, CD47, RAPGEF3, TLR2	621	373	20369	2.55016	0.0715895	0.00275114	0.00266432	2.55016
GOTERM_BP_FAT	GO:2000147~positive regulation of cell motility	Positive Regulation Of Cell Motility	42	6.02582	1.37721e-05	DOCK5, CD274, GRN, SEMA3C, ITGB3, SYNPO2, SERPINE1, CXCR4, LAMC2, CIB1, SEMA3E, PTGS2, THBS1, SYDE1, PAK1, SRPX2, TERT, GLIPR2, PDGFD, PERP, PTK2B, JAK2, CCN1, GPSM3, CARMIL1, CARMIL2, ITGA4, RRAS2, SEMA4G, GAB2, LYVE1, PGF, VIL1, BCL2, CASS4, F2RL1, CD47, LGR6, RAPGEF3, FERMT3, TLR2, HBEGF	621	660	20369	2.08729	0.0831829	0.00310167	0.00300379	2.08729
GOTERM_BP_FAT	GO:0072359~circulatory system development	Circulatory System Development	60	8.60832	1.51089e-05	RB1, GALNT11, CDKN1A, SERPINE1, ADM, CIB1, SYDE1, GYS1, PPP1R13L, LEPR, ANKRD1, HOXA1, CCN2, THSD7A, CCN1, IFT57, PRKG1, ITGA4, SYK, SLC2A10, OSR1, PGF, EREG, PKP2, SIK1, CD47, ZFPM2, RAPGEF3, LY6E, HBEGF, FAM114A1, SEMA3C, COL11A1, CXCR4, SEMA3E, PTGS2, THBS1, PRICKLE4, SOCS3, PDLIM2, SRPX2, TERT, TNNI1, PTK2B, ATG7, PLXNA4, SMAD2, ANGPT2, FZD5, TIPARP, SORBS2, HOPX, TBX2, TMEM231, AMOTL2, B9D1,…	621	1095	20369	1.79728	0.0908795	0.00328541	0.00318173	1.79728
GOTERM_BP_FAT	GO:0009966~regulation of signal transduction	Regulation Of Signal Transduction	140	20.0861	1.57903e-05	RB1, GALNT11, ZFYVE9, SERPINE1, WWC2, DIXDC1, CIB1, CLU, RPS15, SYDE1, CRHBP, DEPTOR, GRB14, SESN2, PIM1, CDK20, FBXO4, LEPR, CCN2, CHAC1, CCN1, PDK2, GUCY1A2, UNC13A, DAPK1, RALGAPA1, RALGAPA2, FST, PCP4, CDC34, RPL26, ATF6, INSIG2, ARHGEF28, H2-M3, PSEN2, ADRB2, MTM1, ENHO, SOCS3, NEU3, NUAK2, TERT, PRKAR2B, PDGFD, CAMTA1, ZBTB7B, RAP1GAP2, SMAD2, FZD5, GOT1, BTN2A2, TGFB3, GADD45A, GPR108, CRI…	621	3267	20369	1.40558	0.0947771	0.00331911	0.00321437	1.40558
GOTERM_BP_FAT	GO:0031175~neuron projection development	Neuron Projection Development	49	7.03013	1.71877e-05	RB1, SNAP25, CLIC5, BTG2, CNTNAP1, RAB3A, LAMC2, ADM, CLU, GRIP1, KIF5C, TCTN1, BOC, HOXA2, HOXA1, JAK2, ZFP365, PRKG1, PTPRV, BBS4, GRCC10, CDKL3, ITGA4, ITGA1, VPS13A, ELMOD3, LIFR, GAP43, GAS7, NYAP1, SEMA3C, ARHGEF28, LAMA3, CXCR4, SEMA3E, EFNA5, BLOC1S6, PAK1, PTK2B, NPTX1, ATG7, PLXNA4, CCK, SEMA4G, DLG4, RAB13, BCL2, FAS, ATXN10	621	831	20369	1.93407	0.102719	0.00338731	0.00328042	1.93407
GOTERM_BP_FAT	GO:0048639~positive regulation of developmental growth	Positive Regulation Of Developmental Growth	21	3.01291	1.7189e-05	UNC13A, SERPINE1, TRPV2, CXCR4, ADRB2, EFNA5, YBX3, HOPX, TBX2, MTM1, VIL1, RNF157, PAK1, HLX, BCL2, PIM1, CDK20, MAP3K13, ZFPM2, PLCB1, BBS4	621	223	20369	3.08882	0.102727	0.00338731	0.00328042	3.08882
GOTERM_BP_FAT	GO:0042592~homeostatic process	Homeostatic Process	84	12.0516	1.81069e-05	RB1, CLIC5, DYRK3, NCF1, THRA, TNFAIP3, C1QTNF9, GRIK2, METRNL, LYST, HERPUD1, TRIM6, PPP1R13L, SESN2, PDE4B, FBXO4, LEPR, CCN2, JAK2, PDK2, PTPRV, BBS4, SLC2A10, SPNS2, APOA2, VPS13A, TMC8, SLC39A13, ATP1B1, FAM210B, NR5A2, ALDH1A1, BOLA2, EFHC1, PKP2, EXOC6, LETMD1, PLCB1, GRN, SLC24A3, CCDC186, FRRS1, MTTP, PSEN2, ATP1A3, ADRB2, PTGS2, CLCN3, FSTL1, RHD, MTM1, PRDX3, MYCT1, BLOC1S6, BRINP1, TM…	621	1722	20369	1.60002	0.107905	0.0034079	0.00330035	1.60002
GOTERM_BP_FAT	GO:0032970~regulation of actin filament-based process	Regulation Of Actin Filament-Based Process	31	4.44763	1.83743e-05	RNH1, ITGB3, SYNPO2, GMFG, DIXDC1, CAPG, ARHGEF10L, EFNA5, IQGAP2, ARHGAP6, RND1, PAK1, BAIAP2L1, PDE4B, PTK2B, CCN2, ARPIN, BBS4, CARMIL1, CARMIL2, TGFB3, GM14137, VIL1, BST2, CDC42EP5, CDC42EP3, PKP2, F2RL1, CD47, RAPGEF3, TLR2	621	424	20369	2.39814	0.109409	0.0034079	0.00330035	2.39814
GOTERM_BP_FAT	GO:0048858~cell projection morphogenesis	Cell Projection Morphogenesis	38	5.45194	2.00212e-05	SNAP25, CNTNAP1, RAB3A, NYAP1, SEMA3C, ARHGEF28, ITGB3, LAMA3, CXCR4, LAMC2, SEMA3E, EFNA5, CLU, GRIP1, PAK1, KIF5C, TCTN1, BOC, HOXA2, HOXA1, NPTX1, ATG7, ZFP365, PRKG1, PLXNA4, PTPRV, GRCC10, CDKL3, ITGA4, ITGA1, VPS13A, CCK, LIFR, SEMA4G, GAP43, DLG4, BCL2, GAS7	621	580	20369	2.14899	0.11861	0.00351111	0.00340031	2.14899
GOTERM_BP_FAT	GO:0048584~positive regulation of response to stimulus	Positive Regulation Of Response To Stimulus	112	16.0689	2.01273e-05	CLPB, SERPINE1, DIXDC1, CIB1, CLU, RPS15, IL18RAP, SESN2, PIM1, LEPR, CCN2, CCN1, PRKCG, GUCY1A2, UNC13A, PGF, EREG, PCP4, MASP1, RPL26, LETMD1, ATF6, CD274, H2-M3, PSEN2, ADRB2, ENHO, NEU3, TERT, PDGFD, CAMTA1, ZBTB7B, ESRRA, SMAD2, CARMIL2, FZD5, GOT1, BTN2A2, TGFB3, GADD45A, RAET1A, NFKBIA, LIN28A, DLG4, BCL2, CASS4, ECHDC3, MAP3K13, LRSAM1, THRA, ITGB3, TNFAIP3, C1QTNF9, HERPUD1, TRIM6, GLIPR…	621	2490	20369	1.47536	0.119199	0.00351111	0.00340031	1.47536
GOTERM_BP_FAT	GO:0043436~oxoacid metabolic process	Oxoacid Metabolic Process	50	7.1736	2.16774e-05	NCF1, HIBADH, C1QTNF9, MPC1, SESN2, DBT, MMUT, PSPH, GATD1, THA1, SYK, GPT2, ELOVL7, HOGA1, PTGR1, THNSL2, FAHD2A, NR5A2, MTHFD2, ALDH1A1, TLR2, GALT, ODC1, ATP1A3, PPM1K, PTGS2, BLOC1S6, PRKAR2B, DGLUCY, HACL1, PCBD1, ST3GAL1, CBR4, PCK2, GSTM1, NOS2, GOT1, PYCR1, PYCR2, ACADSB, MCAT, ASS1, ALDH6A1, GNPDA1, AMACR, FABP4, DHRS9, UST, ECHDC2, ECHDC3	621	862	20369	1.90257	0.127767	0.00351111	0.00340031	1.90257
GOTERM_BP_FAT	GO:0023051~regulation of signaling	Regulation Of Signaling	161	23.099	2.26893e-05	RB1, GALNT11, DGKE, RAB3A, ZFYVE9, SERPINE1, WWC2, DIXDC1, CIB1, TM7SF3, CYP46A1, CLU, RPS15, SYDE1, GRIP1, CRHBP, DEPTOR, GRB14, SESN2, PIM1, CDK20, FBXO4, LEPR, PIM3, CCN2, CHAC1, CCN1, PDK2, PRKCG, GUCY1A2, UNC13A, DAPK1, RALGAPA1, RALGAPA2, FST, PCP4, CDC34, RPL26, ATF6, INSIG2, ARHGEF28, H2-M3, PSEN2, ADRB2, EFNA5, PCDH17, MTM1, ENHO, SOCS3, NEU3, NUAK2, TERT, PRKAR2B, PDGFD, CAMTA1, ZBTB7B,…	621	3901	20369	1.35372	0.133316	0.00351111	0.00340031	1.35372
GOTERM_BP_FAT	GO:0120036~plasma membrane bounded cell projection organization	Plasma Membrane Bounded Cell Projection Organization	68	9.7561	2.33437e-05	RB1, SNAP25, GALNT11, CLIC5, BTG2, CNTNAP1, RAB3A, ITGB4, LAMC2, ADM, CLU, GRIP1, KIF5C, TCTN1, BOC, HOXA2, HOXA1, IFT57, JAK2, ZFP365, PRKG1, PTPRV, BBS4, GRCC10, CDKL3, ITGA4, ITGA1, VPS13A, ELMOD3, EMP1, LIFR, DNM3, GAP43, FAM161A, GAS7, NYAP1, SEMA3C, ARHGEF28, ARL3, LAMA3, ATP1A3, CXCR4, SEMA3E, EFNA5, FGD2, KIF19A, BLOC1S6, PAK1, PTK2B, NPTX1, STX2, ATG7, PLXNA4, CARMIL1, TTC12, TGFB3, CCK,…	621	1315	20369	1.69614	0.136885	0.00351111	0.00340031	1.69614
GOTERM_BP_FAT	GO:0010646~regulation of cell communication	Regulation Of Cell Communication	161	23.099	2.33741e-05	RB1, GALNT11, DGKE, RAB3A, ZFYVE9, SERPINE1, WWC2, DIXDC1, CIB1, TM7SF3, CYP46A1, CLU, RPS15, SYDE1, GRIP1, CRHBP, DEPTOR, GRB14, SESN2, PIM1, CDK20, FBXO4, LEPR, PIM3, CCN2, CHAC1, CCN1, PDK2, PRKCG, GUCY1A2, UNC13A, DAPK1, RALGAPA1, RALGAPA2, FST, PCP4, CDC34, RPL26, ATF6, INSIG2, ARHGEF28, H2-M3, PSEN2, ADRB2, EFNA5, PCDH17, MTM1, ENHO, SOCS3, NEU3, NUAK2, TERT, PRKAR2B, PDGFD, CAMTA1, ZBTB7B,…	621	3903	20369	1.35302	0.13705	0.00351111	0.00340031	1.35302
GOTERM_BP_FAT	GO:0051493~regulation of cytoskeleton organization	Regulation Of Cytoskeleton Organization	37	5.30846	2.46552e-05	RNH1, GDA, ITGB3, SYNPO2, GMFG, DIXDC1, CAPG, ARHGEF10L, CIB1, EFNA5, IQGAP2, ARHGAP6, RND1, SYDE1, PAK1, BAIAP2L1, PTK2B, CCN2, FSD1, MAP9, ARPIN, BBS4, CARMIL1, CARMIL2, TGFB3, GM14137, EML2, VIL1, BST2, PSRC1, CDC42EP5, CHMP2B, CDC42EP3, F2RL1, CD47, RAPGEF3, TLR2	621	563	20369	2.15562	0.143994	0.00351111	0.00340031	2.15562
GOTERM_BP_FAT	GO:0048812~neuron projection morphogenesis	Neuron Projection Morphogenesis	37	5.30846	2.46552e-05	SNAP25, CNTNAP1, RAB3A, NYAP1, SEMA3C, ARHGEF28, LAMA3, CXCR4, LAMC2, SEMA3E, EFNA5, CLU, GRIP1, PAK1, KIF5C, TCTN1, BOC, HOXA2, HOXA1, NPTX1, ATG7, ZFP365, PRKG1, PLXNA4, PTPRV, GRCC10, CDKL3, ITGA4, ITGA1, VPS13A, CCK, LIFR, SEMA4G, GAP43, DLG4, BCL2, GAS7	621	563	20369	2.15562	0.143994	0.00351111	0.00340031	2.15562
GOTERM_BP_FAT	GO:1902905~positive regulation of supramolecular fiber organization	Positive Regulation Of Supramolecular Fiber Organization	19	2.72597	2.47682e-05	RB1, CARMIL1, CARMIL2, GDA, TGFB3, GM14137, SYNPO2, ARHGEF10L, VIL1, PAK1, PSRC1, BAIAP2L1, CDC42EP5, CDC42EP3, F2RL1, PTK2B, CD47, CCN2, RAPGEF3	621	192	20369	3.24587	0.144603	0.00351111	0.00340031	3.24587
GOTERM_BP_FAT	GO:1902903~regulation of supramolecular fiber organization	Regulation Of Supramolecular Fiber Organization	30	4.30416	2.53747e-05	RB1, RNH1, GDA, SYNPO2, GMFG, CAPG, ARHGEF10L, CIB1, ARHGAP6, CLU, PAK1, BAIAP2L1, PTK2B, CCN2, ARPIN, BBS4, CARMIL1, CARMIL2, TGFB3, GM14137, EML2, VIL1, PSRC1, CDC42EP5, CDC42EP3, F2RL1, CD47, CRYAB, RAPGEF3, TLR2	621	410	20369	2.40002	0.147869	0.00351111	0.00340031	2.40002
GOTERM_BP_FAT	GO:0051336~regulation of hydrolase activity	Regulation Of Hydrolase Activity	30	4.30416	2.53747e-05	CSTB, GRN, RGS16, SERPINE1, EFNA5, ARHGAP6, SYDE1, LEPR, PTK2B, TIMP3, MMUT, CCN1, PPARGC1B, PRKG1, BBS4, TBC1D10B, RALGAPA1, SORT1, RALGAPA2, APOA2, TBC1D2, LRCH1, SGSM2, PDE3A, F2RL1, SPRY1, GNB5, NEIL1, RECK, RAPGEF3	621	410	20369	2.40002	0.147869	0.00351111	0.00340031	2.40002
GOTERM_BP_FAT	GO:0040017~positive regulation of locomotion	Positive Regulation Of Locomotion	42	6.02582	2.56123e-05	DOCK5, CD274, GRN, SEMA3C, ITGB3, SYNPO2, SERPINE1, CXCR4, LAMC2, CIB1, SEMA3E, PTGS2, THBS1, SYDE1, PAK1, SRPX2, TERT, GLIPR2, PDGFD, PERP, PTK2B, JAK2, CCN1, GPSM3, CARMIL1, CARMIL2, ITGA4, RRAS2, SEMA4G, GAB2, LYVE1, PGF, VIL1, BCL2, CASS4, F2RL1, CD47, LGR6, RAPGEF3, FERMT3, TLR2, HBEGF	621	678	20369	2.03188	0.149145	0.00351111	0.00340031	2.03188
GOTERM_BP_FAT	GO:0030030~cell projection organization	Cell Projection Organization	70	10.043	2.65684e-05	RB1, SNAP25, GALNT11, CLIC5, BTG2, CNTNAP1, RAB3A, ITGB4, ITGB3, LAMC2, ADM, CLU, GRIP1, KIF5C, TCTN1, BOC, HOXA2, HOXA1, IFT57, JAK2, ZFP365, PRKG1, PTPRV, BBS4, GRCC10, CDKL3, ITGA4, ITGA1, VPS13A, ELMOD3, EMP1, LIFR, DNM3, GAP43, FAM161A, GAS7, NYAP1, SEMA3C, ARHGEF28, ARL3, LAMA3, ATP1A3, CXCR4, CAPG, SEMA3E, EFNA5, FGD2, KIF19A, BLOC1S6, PAK1, PTK2B, NPTX1, STX2, ATG7, PLXNA4, CARMIL1, TTC12…	621	1371	20369	1.67471	0.154259	0.00356468	0.00345219	1.67471
GOTERM_BP_FAT	GO:0065009~regulation of molecular function	Regulation Of Molecular Function	85	12.1951	3.00338e-05	RB1, CDKN1A, ITGB3, SETD6, ZFAS1, SERPINE1, TNFAIP3, CIB1, C1QTNF9, ARHGAP6, CLU, SYDE1, CRHBP, TRIM6, IL18RAP, DEPTOR, DUSP10, RPS6KA5, SESN2, PIM1, LEPR, TIMP3, MMUT, CCN1, JAK2, PRKG1, BBS4, TBC1D10B, ITGA4, SYK, DAPK1, RALGAPA1, S100A1, RALGAPA2, OSR1, APOA2, TMC8, ARID5B, ATP1B1, EREG, GREM2, TBC1D2, PSRC1, SIK1, NEIL1, PLCB1, RAPGEF3, TLR2, CSTB, GRN, RGS16, SYNPO2, PSEN2, ADRB2, SLC5A1, EF…	621	1772	20369	1.57338	0.172541	0.00394569	0.00382117	1.57338
GOTERM_BP_FAT	GO:0120039~plasma membrane bounded cell projection morphogenesis	Plasma Membrane Bounded Cell Projection Morphogenesis	37	5.30846	3.10127e-05	SNAP25, CNTNAP1, RAB3A, NYAP1, SEMA3C, ARHGEF28, LAMA3, CXCR4, LAMC2, SEMA3E, EFNA5, CLU, GRIP1, PAK1, KIF5C, TCTN1, BOC, HOXA2, HOXA1, NPTX1, ATG7, ZFP365, PRKG1, PLXNA4, PTPRV, GRCC10, CDKL3, ITGA4, ITGA1, VPS13A, CCK, LIFR, SEMA4G, GAP43, DLG4, BCL2, GAS7	621	569	20369	2.13289	0.177633	0.00399114	0.00386519	2.13289
GOTERM_BP_FAT	GO:0051093~negative regulation of developmental process	Negative Regulation Of Developmental Process	62	8.89527	3.37189e-05	RB1, CDKN1A, BTG2, ITGB3, WWC2, SERPINE1, BHLHE41, DIXDC1, SRA1, XYLT1, CIB1, YBX3, TRIM6, DUSP10, GRB14, SIX4, HOXA2, ARPIN, CDKL3, KLF13, OSR1, FST, 4930550C14RIK, EREG, DNM3, NR5A2, ADGRB3, PKP2, TCTA, HOXB8, ZFPM2, JDP2, RAPGEF3, TLR2, H2-M3, SEMA3E, ADRB2, TOB1, THBS1, FSTL3, PAK1, BRINP1, TERT, HLX, PTK2B, ZBTB7B, ANGPT2, GADD45A, SORT1, CRIM1, NR1D1, LILRB4A, MEIS2, HOPX, TBX2, NFKBIA, RCA…	621	1177	20369	1.7278	0.191549	0.00425262	0.00411842	1.7278
GOTERM_BP_FAT	GO:0006082~organic acid metabolic process	Organic Acid Metabolic Process	50	7.1736	3.4444e-05	NCF1, HIBADH, C1QTNF9, MPC1, SESN2, DBT, MMUT, PSPH, GATD1, THA1, SYK, GPT2, ELOVL7, HOGA1, PTGR1, THNSL2, FAHD2A, NR5A2, MTHFD2, ALDH1A1, TLR2, GALT, ODC1, ATP1A3, PPM1K, PTGS2, BLOC1S6, PRKAR2B, DGLUCY, HACL1, PCBD1, ST3GAL1, CBR4, PCK2, GSTM1, NOS2, GOT1, PYCR1, PYCR2, ACADSB, MCAT, ASS1, ALDH6A1, GNPDA1, AMACR, FABP4, DHRS9, UST, ECHDC2, ECHDC3	621	878	20369	1.8679	0.195237	0.0042589	0.0041245	1.8679
GOTERM_BP_FAT	GO:0030097~hemopoiesis	Hemopoiesis	49	7.03013	3.75e-05	RB1, DYRK3, CLPB, THRA, TNFAIP3, CIB1, SIGLECG, CTSL, LEPR, CLEC1B, JAK2, TPD52, IL15RA, SYK, IL15, FST, VPS13A, GP1BA, MITF, GAB2, FAM210B, IL3RA, EXOC6, TCTA, PLCB1, TLR2, CEBPB, PSEN2, PBXIP1, MLLT3, RHD, FSTL3, PRDX3, IL1RL1, NFIL3, HLX, PTK2B, ZBTB7B, ST3GAL1, ANGPT2, FZD5, TIPARP, POLM, MERTK, CDK6, BCL2, FAS, F2RL1, ITM2A	621	857	20369	1.8754	0.210598	0.00454151	0.0043982	1.8754
GOTERM_BP_FAT	GO:0012501~programmed cell death	Programmed Cell Death	61	8.75179	3.83215e-05	RB1, CDKN1A, 1600012H06RIK, SRA1, AATK, TNFAIP3, CIB1, GRIK2, KRT20, YBX3, CLU, PPP1R13L, CTSL, RASSF6, PIM1, PIM3, CHAC1, CCN1, IFT57, JAK2, PDK2, PDK1, CERS3, SYK, DAPK1, EMP1, MITF, ALDH1A1, TMEM219, SIK1, CD47, PLEKHO2, CRYAB, BEX3, CEBPB, PHLPP1, MTFP1, USP53, PSEN2, PPM1K, THBS1, PAK1, NUAK2, PERP, NPTX1, ATG7, WWOX, FZD5, 1600014C10RIK, TGFB3, SORT1, TNFRSF10B, CCK, TBX2, GULP1, VIL1, BCL2…	621	1156	20369	1.73081	0.214677	0.00454151	0.0043982	1.73081
GOTERM_BP_FAT	GO:0006915~apoptotic process	Apoptotic Process	59	8.46485	3.88902e-05	RB1, CDKN1A, 1600012H06RIK, SRA1, AATK, TNFAIP3, CIB1, GRIK2, KRT20, YBX3, CLU, PPP1R13L, RASSF6, PIM1, PIM3, CHAC1, CCN1, IFT57, JAK2, PDK2, PDK1, SYK, DAPK1, EMP1, MITF, ALDH1A1, TMEM219, SIK1, CD47, PLEKHO2, CRYAB, BEX3, CEBPB, PHLPP1, MTFP1, USP53, PSEN2, PPM1K, THBS1, PAK1, NUAK2, PERP, NPTX1, ATG7, WWOX, FZD5, 1600014C10RIK, TGFB3, SORT1, TNFRSF10B, CCK, TBX2, GULP1, VIL1, BCL2, PDE3A, FAS,…	621	1106	20369	1.74975	0.217488	0.00454151	0.0043982	1.74975
GOTERM_BP_FAT	GO:1902531~regulation of intracellular signal transduction	Regulation Of Intracellular Signal Transduction	96	13.7733	4.13673e-05	DYRK3, THRA, ITGB3, ZFAS1, WWC2, DIXDC1, TNFAIP3, CIB1, GRIK2, YBX3, CLU, SIGLECG, HERPUD1, RPS15, SYDE1, DEPTOR, DUSP10, GLIPR2, SESN2, PIM1, FBXO4, LEPR, ANKRD1, PDE4A, FLOT2, CCN2, CCN1, FGFBP3, JAK2, PDK2, GUCY1A2, SYK, RALGAPA1, RALGAPA2, ITGA1, ZDHHC12, TMC8, PCP4, CDC34, RASA3, RASA4, RPL26, EEF1E1, PLCB1, ATF6, RAPGEF3, TLR2, HBEGF, PHLPP1, INSIG2, ARHGEF28, H2-M3, CXCR4, SEMA3E, ADRB2, P…	621	2088	20369	1.50806	0.229617	0.00474295	0.00459327	1.50806
GOTERM_BP_FAT	GO:0008219~cell death	Cell Death	61	8.75179	4.30115e-05	RB1, CDKN1A, 1600012H06RIK, SRA1, AATK, TNFAIP3, CIB1, GRIK2, KRT20, YBX3, CLU, PPP1R13L, CTSL, RASSF6, PIM1, PIM3, CHAC1, CCN1, IFT57, JAK2, PDK2, PDK1, CERS3, SYK, DAPK1, EMP1, MITF, ALDH1A1, TMEM219, SIK1, CD47, PLEKHO2, CRYAB, BEX3, CEBPB, PHLPP1, MTFP1, USP53, PSEN2, PPM1K, THBS1, PAK1, NUAK2, PERP, NPTX1, ATG7, WWOX, FZD5, 1600014C10RIK, TGFB3, SORT1, TNFRSF10B, CCK, TBX2, GULP1, VIL1, BCL2…	621	1161	20369	1.72336	0.237564	0.0048434	0.00469055	1.72336
GOTERM_BP_FAT	GO:0034097~response to cytokine	Response To Cytokine	63	9.03874	4.59886e-05	IFITM3, SERPINE1, CIB1, YBX3, CRHBP, TRIM6, IL18RAP, RPS6KA5, MPC1, DPYSL3, PIM1, LEPR, ANKRD1, TIMP3, JAK2, BBS4, IL15RA, ITGA4, SYK, DAPK1, IL15, STX8, ARID5B, LIFR, EREG, GREM2, NR5A2, CDC34, RUFY4, SHPK, IL3RA, CD47, EEF1E1, PLCB1, TLR2, CD274, CEBPB, STOML1, CXCR4, CAPG, PTGS2, THBS1, SOCS3, IL1RL1, NFIL3, PTK2B, ST3GAL6, CCR10, PCK2, PMM1, NOS2, GPR108, STAT2, NR1D1, MERTK, ASS1, BST2, NFKB…	621	1215	20369	1.70076	0.251745	0.00508779	0.00492724	1.70076
GOTERM_BP_FAT	GO:0051128~regulation of cellular component organization	Regulation Of Cellular Component Organization	119	17.0732	4.91771e-05	RB1, RAB3A, RNH1, GDA, GMFG, SERPINE1, PPAN, DIXDC1, XYLT1, CIB1, CLU, SYDE1, GRIP1, BAIAP2L1, RPS6KA5, SESN2, DPYSL3, FBXO4, CCN2, ARPIN, PRKCG, IL15RA, CDKL3, UNC13A, FBXW5, GM14137, 4930550C14RIK, EML2, TANC2, EREG, TOM1L2, PCP4, CDC34, ADGRB3, FEZ1, PKP2, LETMD1, PSEN2, ADRB2, EFNA5, IQGAP2, MTM1, NEU3, DGUOK, ATG7, PLXNA4, MAP9, RAP1GAP2, CARMIL1, CARMIL2, FZD5, TGFB3, TRPV2, RAB27A, HOPX, V…	621	2740	20369	1.42454	0.26664	0.00534674	0.00517801	1.42454
GOTERM_BP_FAT	GO:0048585~negative regulation of response to stimulus	Negative Regulation Of Response To Stimulus	88	12.6255	5.06735e-05	RB1, DYRK3, WWC2, SERPINE1, TNFAIP3, XYLT1, ADM, CIB1, METRNL, YBX3, CLU, SIGLECG, HERPUD1, CRHBP, DEPTOR, DUSP10, GRB14, PPP1R13L, SESN2, PDE4B, PIM1, CDK20, PIM3, CHAC1, PRKG1, BBS4, DAPK1, SLC2A10, FST, ITGA1, ZDHHC12, TMC8, GP1BA, PTGR1, GREM2, CD200R1, NR5A2, CDC34, RASA3, RASA4, MASP1, CD274, GRN, PHLPP1, INSIG2, RGS16, H2-M3, PSEN2, ADRB2, PTGS2, MLLT3, TOB1, THBS1, FSTL3, MTM1, SOCS3, IL1…	621	1880	20369	1.53533	0.273528	0.00537812	0.0052084	1.53533
GOTERM_BP_FAT	GO:0021700~developmental maturation	Developmental Maturation	27	3.87374	5.11714e-05	TDRKH, RB1, CDKN1A, RAB3A, PSEN2, XYLT1, PTGS2, CLCN3, THBS3, RND1, BLOC1S6, CTSL, PTK2B, ATP6V1F, UNC13A, FZD5, IL15, SEPTIN4, TDRD5, EREG, FAM210B, DLG4, ADGRB3, BCL2, PDE3A, PLCB1, RECK	621	362	20369	2.44643	0.275806	0.00537812	0.0052084	2.44643
GOTERM_BP_FAT	GO:0006950~response to stress	Response To Stress	156	22.3816	5.22676e-05	IFITM3, RAB3A, CLPB, NCF1, SERPINE1, XYLT1, CIB1, TM7SF3, METRNL, CLU, CRHBP, IL18RAP, RPS6KA5, SESN2, DPYSL3, PIM1, FBXO4, FBXO6, CHAC1, CCN1, PDK2, PDK1, PRKCG, DAPK1, STX8, DNAJB14, ATP1B1, PGF, PROCR, MASP1, RPL26, LETMD1, NEIL1, ATF6, LY6E, PFKFB1, RNASEH2A, PLGRKT, FAM114A1, INSIG2, H2-M3, PSEN2, ADRB2, PRDX3, BLOC1S6, BRINP1, NUAK2, TERT, ELDR, PDGFD, CAMTA2, ATG7, PPARGC1B, PCK2, CARMIL2,…	621	3816	20369	1.34089	0.280794	0.00540327	0.00523276	1.34089
GOTERM_BP_FAT	GO:0048666~neuron development	Neuron Development	55	7.89096	6.3802e-05	RB1, SNAP25, CLIC5, BTG2, CNTNAP1, RAB3A, LAMC2, ADM, CLU, RND1, GRIP1, KIF5C, TCTN1, DPYSL3, BOC, HOXA2, HOXA1, JAK2, ZFP365, PRKG1, PTPRV, BBS4, GRCC10, CDKL3, ITGA4, ITGA1, VPS13A, ELMOD3, LIFR, GAP43, ADGRB3, GAS7, NYAP1, SEMA3C, ARHGEF28, ARL3, LAMA3, CXCR4, SEMA3E, EFNA5, BLOC1S6, PAK1, BRINP1, PTK2B, NPTX1, ATG7, PLXNA4, CCK, SEMA4G, UQCRQ, DLG4, RAB13, BCL2, FAS, ATXN10	621	1025	20369	1.76002	0.331252	0.00648928	0.0062845	1.76002
GOTERM_BP_FAT	GO:1901652~response to peptide	Response To Peptide	63	9.03874	6.97068e-05	IFITM3, SERPINE1, CIB1, YBX3, CRHBP, TRIM6, IL18RAP, RPS6KA5, MPC1, DPYSL3, PIM1, LEPR, ANKRD1, TIMP3, JAK2, BBS4, IL15RA, ITGA4, SYK, DAPK1, IL15, STX8, ARID5B, LIFR, EREG, GREM2, NR5A2, CDC34, RUFY4, SHPK, IL3RA, CD47, EEF1E1, PLCB1, TLR2, CD274, CEBPB, STOML1, CXCR4, CAPG, PTGS2, THBS1, SOCS3, IL1RL1, NFIL3, PTK2B, ST3GAL6, CCR10, PCK2, PMM1, NOS2, GPR108, STAT2, NR1D1, MERTK, ASS1, BST2, NFKB…	621	1233	20369	1.67593	0.355697	0.00697732	0.00675714	1.67593
GOTERM_BP_FAT	GO:0080134~regulation of response to stress	Regulation Of Response To Stress	74	10.6169	7.19806e-05	RB1, LRSAM1, DYRK3, CLPB, NCF1, SETD6, SERPINE1, TNFAIP3, XYLT1, METRNL, YBX3, CLU, SIGLECG, HERPUD1, CRHBP, TRIM6, IL18RAP, DUSP10, PPP1R13L, SESN2, PIM1, FBXO4, ANKRD1, EMILIN2, JAK2, ZFP365, GPSM3, PRKG1, PRKCG, VKORC1, SYK, IL15, ZDHHC12, GP1BA, UCHL5, EREG, CD200R1, NR5A2, SHPK, CD47, RPL26, LETMD1, EEF1E1, ATF6, TLR2, HBEGF, CD274, CEBPB, GRN, INSIG2, UNC93B1, H2-M3, CXCR4, PTGS2, THBS1, SO…	621	1522	20369	1.59476	0.36487	0.00709234	0.00686852	1.59476
GOTERM_BP_FAT	GO:0110053~regulation of actin filament organization	Regulation Of Actin Filament Organization	23	3.29986	7.41606e-05	CARMIL1, CARMIL2, RNH1, TGFB3, GM14137, SYNPO2, GMFG, CAPG, ARHGEF10L, ARHGAP6, VIL1, PAK1, BAIAP2L1, CDC42EP5, CDC42EP3, F2RL1, PTK2B, CD47, CCN2, ARPIN, BBS4, RAPGEF3, TLR2	621	287	20369	2.6286	0.373542	0.00719472	0.00696768	2.6286
GOTERM_BP_FAT	GO:0045927~positive regulation of growth	Positive Regulation Of Growth	25	3.5868	7.75313e-05	SERPINE1, CXCR4, CIB1, ADRB2, EFNA5, YBX3, MTM1, RNF157, PAK1, HLX, PIM1, CDK20, PTK2B, BBS4, UNC13A, TRPV2, HOPX, TBX2, VIL1, BCL2, MAP3K13, ZFPM2, PLCB1, SLC25A33, HBEGF	621	329	20369	2.49243	0.386719	0.00740777	0.007174	2.49243
GOTERM_BP_FAT	GO:0045597~positive regulation of cell differentiation	Positive Regulation Of Cell Differentiation	55	7.89096	8.7664e-05	RB1, THRA, ITGB3, SERPINE1, DIXDC1, ADM, METRNL, CLU, GRIP1, DUSP10, GLIPR2, PPP1R13L, BOC, PIM1, CCN2, CCN1, JAK2, ZFP365, IL15RA, CDKL3, SYK, ZFP219, IL15, FAM210B, PCP4, NR5A2, PLCB1, TLR2, CEBPB, H2-M3, CXCR4, CREBL2, PTGS2, EFNA5, SOCS3, BLOC1S6, PAK1, BRINP1, TERT, HLX, ZBTB7B, PPARGC1B, SMAD2, CARMIL2, BTN2A2, TGFB3, TRPV2, LILRB4A, HOPX, LIN28A, DLG4, BCL2, PDE3A, MAP3K13, FOXA3	621	1037	20369	1.73965	0.424683	0.00825088	0.00799051	1.73965
GOTERM_BP_FAT	GO:0007596~blood coagulation	Blood Coagulation	15	2.15208	9.7073e-05	VKORC1, ANGPT2, ITGB3, TFPI2, RAB27A, GP1BA, LILRB4A, MERTK, LYST, PRRG4, PROCR, BLOC1S6, RASA3, F2RL1, FERMT3	621	140	20369	3.51432	0.457828	0.00900209	0.00871801	3.51432
GOTERM_BP_FAT	GO:0048646~anatomical structure formation involved in morphogenesis	Anatomical Structure Formation Involved In Morphogenesis	57	8.17791	0.000102921	DOCK5, CNTNAP1, ITGB4, ITGB3, SERPINE1, ADM, CIB1, SIX4, TCTN1, CDK20, LEPR, HOXA1, CCN2, THSD7A, CCN1, CLEC1B, IFT57, BBS4, ITGA4, SYK, ZFP219, OSR1, PGF, EREG, NR5A2, TNNT1, ADGRB3, ALDH1A1, TCTA, CD47, ZFPM2, RAPGEF3, TLR2, HBEGF, SEMA3C, COL11A1, LAMA3, PSEN2, CXCR4, SEMA3E, PTGS2, THBS1, THBS3, SRPX2, PERP, PTK2B, CNNM4, PPARGC1B, SMAD2, ANGPT2, FZD5, HOPX, TBX2, TTLL1, AMOTL2, RECK, PLCD1	621	1095	20369	1.70741	0.477458	0.00940604	0.00910921	1.70741
GOTERM_BP_FAT	GO:0050817~coagulation	Coagulation	15	2.15208	0.000104822	VKORC1, ANGPT2, ITGB3, TFPI2, RAB27A, GP1BA, LILRB4A, MERTK, LYST, PRRG4, PROCR, BLOC1S6, RASA3, F2RL1, FERMT3	621	141	20369	3.4894	0.483687	0.00944298	0.00914498	3.4894
GOTERM_BP_FAT	GO:0043434~response to peptide hormone	Response To Peptide Hormone	33	4.73458	0.00011131	RB1, PFKFB1, BTG2, FAM114A1, INSIG2, ITGB3, ADM, PTGS2, CRHBP, PAK1, GRB14, SESN2, JAK2, ZBTB7B, PTPRV, PDK2, PCK2, PRKCG, GOT1, SORT1, VPS13C, STAT2, MEAK7, MERTK, ASS1, EREG, POMC, RAB13, PLCB1, SLC25A33, CPEB2, PLCD1, TLR2	621	513	20369	2.10996	0.504388	0.00980946	0.0094999	2.10996
GOTERM_BP_FAT	GO:0009888~tissue development	Tissue Development	93	13.3429	0.000112001	RB1, CLIC5, CDKN1A, BTG2, CNTNAP1, THRA, ITGB4, ITGB3, ZFAS1, MYL6B, LAMC2, ADM, KRT20, SIX4, PPP1R13L, CTSL, TCTN1, CDK20, ANKRD1, TIMP3, RPL38, CCN2, CCN1, IFT57, JAK2, PRKG1, BBS4, CERS3, MAGI1, ITGA4, OSR1, FST, ELMOD3, ARID5B, SLC39A13, OVOL1, PGF, SELENOM, NR5A2, ALDH1A1, PKP2, SIK1, ZFPM2, RAPGEF3, LY6E, HBEGF, CEBPB, SLC24A3, SEMA3C, COL11A1, LAMA3, PSEN2, CXCR4, PBXIP1, SEMA3E, PTGS2, TH…	621	2061	20369	1.48007	0.506543	0.00980946	0.0094999	1.48007
GOTERM_BP_FAT	GO:0032101~regulation of response to external stimulus	Regulation Of Response To External Stimulus	61	8.75179	0.00012099	RB1, LRSAM1, CLPB, NCF1, SETD6, SERPINE1, TNFAIP3, XYLT1, METRNL, SIGLECG, TRIM6, IL18RAP, DUSP10, PPP1R13L, PIM1, EMILIN2, JAK2, GPSM3, PRKG1, VKORC1, SYK, IL15, ZDHHC12, GP1BA, PTGR1, PGF, EREG, CD200R1, NR5A2, SHPK, CD47, LETMD1, TLR2, CD274, CEBPB, GRN, UNC93B1, H2-M3, CXCR4, PTGS2, THBS1, SOCS3, IL1RL1, DDT, PERP, PDGFD, SUSD4, PTK2B, PLXNA4, CD55, ANGPT2, GPR108, STAT2, NR1D1, HOPX, POMC, N…	621	1205	20369	1.66043	0.533738	0.0103916	0.0100637	1.66043
GOTERM_BP_FAT	GO:0007599~hemostasis	Hemostasis	15	2.15208	0.000121944	VKORC1, ANGPT2, ITGB3, TFPI2, RAB27A, GP1BA, LILRB4A, MERTK, LYST, PRRG4, PROCR, BLOC1S6, RASA3, F2RL1, FERMT3	621	143	20369	3.44059	0.536537	0.0103916	0.0100637	3.44059
GOTERM_BP_FAT	GO:0071345~cellular response to cytokine stimulus	Cellular Response To Cytokine Stimulus	56	8.03443	0.000128796	IFITM3, SERPINE1, CIB1, YBX3, CRHBP, TRIM6, IL18RAP, RPS6KA5, MPC1, DPYSL3, PIM1, LEPR, ANKRD1, JAK2, BBS4, IL15RA, ITGA4, SYK, DAPK1, IL15, STX8, ARID5B, LIFR, EREG, GREM2, NR5A2, CDC34, RUFY4, SHPK, IL3RA, CD47, EEF1E1, PLCB1, TLR2, CEBPB, STOML1, CXCR4, CAPG, THBS1, SOCS3, IL1RL1, NFIL3, PTK2B, ST3GAL6, CCR10, PCK2, PMM1, NOS2, GPR108, STAT2, NR1D1, MERTK, ASS1, NFKBIA, LRCH1, FABP4	621	1079	20369	1.70233	0.556137	0.0107477	0.0104085	1.70233
GOTERM_BP_FAT	GO:0048638~regulation of developmental growth	Regulation Of Developmental Growth	28	4.01722	0.000129531	CDKN1A, GRN, WWC2, SERPINE1, CXCR4, ADRB2, EFNA5, YBX3, MTM1, RNF157, PAK1, DUSP10, SIX4, HLX, PIM1, CDK20, PLXNA4, BBS4, CDKL3, UNC13A, TRPV2, HOPX, TBX2, VIL1, BCL2, MAP3K13, ZFPM2, PLCB1	621	405	20369	2.26768	0.558191	0.0107477	0.0104085	2.26768
GOTERM_BP_FAT	GO:0009611~response to wounding	Response To Wounding	31	4.44763	0.000146294	CDKN1A, RAB3A, ITGB4, ITGB3, TNFAIP3, LYST, PRRG4, IL1RL1, BLOC1S6, PAK1, ELDR, DPYSL3, JAK2, CCN1, VKORC1, CARMIL2, ANGPT2, TFPI2, RAB27A, GP1BA, LILRB4A, MERTK, PROCR, GAP43, MORN4, RASA3, CHMP2B, BCL2, F2RL1, FERMT3, HBEGF	621	475	20369	2.14065	0.602515	0.0119809	0.0116028	2.14065
GOTERM_BP_FAT	GO:0000902~cell morphogenesis	Cell Morphogenesis	46	6.59971	0.000151078	RB1, SNAP25, CLIC5, CNTNAP1, RAB3A, NYAP1, SEMA3C, UNC93B1, ARHGEF28, ITGB3, LAMA3, CXCR4, LAMC2, CIB1, SEMA3E, EFNA5, CLU, GRIP1, PAK1, KIF5C, TCTN1, BOC, HOXA2, HOXA1, NPTX1, CLEC1B, ATG7, ZFP365, PRKG1, PLXNA4, PTPRV, MAGI1, GRCC10, CDKL3, ITGA4, ITGA1, VPS13A, GP1BA, CCK, LIFR, SEMA4G, GAP43, DLG4, BCL2, AMOTL2, GAS7	621	833	20369	1.8113	0.61433	0.0122141	0.0118287	1.8113
GOTERM_BP_FAT	GO:2000026~regulation of multicellular organismal development	Regulation Of Multicellular Organismal Development	78	11.1908	0.000155111	RB1, BTG2, RNH1, ITGB3, SERPINE1, BHLHE41, DIXDC1, ADM, CIB1, GRIP1, DUSP10, SIX4, PIM1, CDK20, EMILIN2, CCN2, CCN1, ZFP365, IL15RA, CDKL3, KLF13, SYK, ZFP219, IL15, S100A1, OSR1, FST, MITF, UCHL5, PGF, FAM210B, NR5A2, ADGRB3, TCTA, HOXB8, ZFPM2, PLCB1, RAPGEF3, TLR2, CEBPB, GRN, LAMA3, H2-M3, CXCR4, SEMA3E, ADRB2, EFNA5, THBS1, FSTL3, PAK1, BRINP1, SRPX2, TERT, HLX, PTK2B, ZBTB7B, ATG7, PPARGC1B…	621	1669	20369	1.53291	0.624016	0.0123814	0.0119907	1.53291
GOTERM_BP_FAT	GO:1901605~alpha-amino acid metabolic process	Alpha-Amino Acid Metabolic Process	18	2.5825	0.000167575	THA1, NOS2, HIBADH, GOT1, GPT2, ODC1, PYCR1, PYCR2, HOGA1, ACADSB, THNSL2, ASS1, ALDH6A1, BLOC1S6, DGLUCY, PCBD1, MMUT, PSPH	621	203	20369	2.9084	0.65244	0.0132091	0.0127923	2.9084
GOTERM_BP_FAT	GO:0051246~regulation of protein metabolic process	Regulation Of Protein Metabolic Process	91	13.056	0.000188468	RB1, CDKN1A, BTG2, ITGB3, SERPINE1, TNFAIP3, CIB1, C1QTNF9, CLU, HERPUD1, TRIM6, DEPTOR, DUSP10, SESN2, PIM1, CDK20, FBXO4, LEPR, FLOT2, TIMP3, RPL38, CCN2, CHAC1, CCN1, JAK2, PSTK, PRKCG, UNC13A, SYK, DAPK1, IL15, SLC2A10, UCHL5, EREG, PSRC1, FAM161A, GSAP, RPL26, AURKAIP1, PLCB1, CRYAB, RAPGEF3, HBEGF, BEX3, CSTB, GRN, PHLPP1, NNMT, PLGRKT, SYNPO2, ODC1, PSEN2, CXCR4, CREBL2, ADRB2, PTGS2, EFNA…	621	2037	20369	1.46531	0.69535	0.0146726	0.0142095	1.46531
GOTERM_BP_FAT	GO:0051495~positive regulation of cytoskeleton organization	Positive Regulation Of Cytoskeleton Organization	18	2.5825	0.00019968	CARMIL1, CARMIL2, GDA, TGFB3, GM14137, SYNPO2, ARHGEF10L, VIL1, PAK1, PSRC1, BAIAP2L1, CDC42EP5, CDC42EP3, F2RL1, PTK2B, CD47, CCN2, RAPGEF3	621	206	20369	2.86605	0.716149	0.0153558	0.0148713	2.86605
GOTERM_BP_FAT	GO:0065008~regulation of biological quality	Regulation Of Biological Quality	140	20.0861	0.000208783	RAB3B, RAB3A, NCF2, ISOC2B, SERPINE1, TM7SF3, CYP46A1, CLU, GRIP1, CRHBP, BAIAP2L1, RPS6KA5, DEPTOR, PIM1, FBXO4, LEPR, PIM3, BORCS6, PRKCG, CDKL3, UNC13A, GM14137, ATP1B1, TANC2, PGF, SYTL2, PROCR, SELENOM, RNF128, ADGRB3, PKP2, USP53, PSEN2, CREBL2, ADRB2, EFNA5, PRDX3, BLOC1S6, BRINP1, RDH12, TERT, NPTX1, ZBTB7B, ATG7, PLXNA4, CCR10, PCK2, RAP1GAP2, SMAD2, ATP8B5, CARMIL1, CARMIL2, GOT1, TIPAR…	621	3447	20369	1.33219	0.731988	0.0158625	0.0153619	1.33219
GOTERM_BP_FAT	GO:0050727~regulation of inflammatory response	Regulation Of Inflammatory Response	28	4.01722	0.000216488	RB1, CEBPB, GRN, NCF1, SETD6, SERPINE1, TNFAIP3, PTGS2, METRNL, SIGLECG, SOCS3, IL1RL1, DUSP10, DDT, PPP1R13L, JAK2, GPSM3, NR1D1, NFKBIA, CD200R1, NR5A2, FABP4, ZDHHC9, SHPK, CD47, LETMD1, PIK3AP1, TLR2	621	418	20369	2.19715	0.744702	0.0162521	0.0157392	2.19715
GOTERM_BP_FAT	GO:0030155~regulation of cell adhesion	Regulation Of Cell Adhesion	46	6.59971	0.000231064	DOCK5, CD274, CEBPB, ITGB3, NEXMIF, LAMA3, H2-M3, SERPINE1, CXCR4, TNFAIP3, CIB1, SEMA3E, EFNA5, THBS1, ARHGAP6, RND1, FSTL3, DUSP10, HLX, PTK2B, FLOT2, EMILIN2, JAK2, ZBTB7B, CCN1, CD55, PRKG1, MAGI1, CARMIL1, CARMIL2, ANGPT2, ITGA4, BTN2A2, SYK, IL15, GP1BA, LILRB4A, ASS1, CDK6, NR5A2, BCL2, CASS4, PKP2, CD47, MDGA2, FERMT3	621	849	20369	1.77717	0.767127	0.0170027	0.0164662	1.77717
GOTERM_BP_FAT	GO:0040008~regulation of growth	Regulation Of Growth	40	5.73888	0.00023188	RB1, CDKN1A, GRN, WWC2, SERPINE1, PPAN, CXCR4, CIB1, ADRB2, EFNA5, YBX3, MTM1, RNF157, PAK1, DUSP10, SIX4, HLX, SESN2, PIM1, CDK20, PTK2B, PLXNA4, BBS4, CDKL3, UNC13A, TRPV2, HOPX, TBX2, VIL1, BST2, GAP43, PSRC1, IL3RA, BCL2, MAP3K13, ZFPM2, PLCB1, CRYAB, SLC25A33, HBEGF	621	701	20369	1.87163	0.768322	0.0170027	0.0164662	1.87163
GOTERM_BP_FAT	GO:0120162~positive regulation of cold-induced thermogenesis	Positive Regulation Of Cold-Induced Thermogenesis	12	1.72166	0.000253041	CEBPB, FABP4, SYK, THRA, TRPV2, LEPR, CXCR4, ADRB2, JAK2, ZBTB7B, LETMD1, PPARGC1B	621	101	20369	3.89707	0.797269	0.0183411	0.0177623	3.89707
GOTERM_BP_FAT	GO:0043087~regulation of GTPase activity	Regulation Of Gtpase Activity	18	2.5825	0.000265514	RALGAPA1, RGS16, RALGAPA2, EFNA5, ARHGAP6, SYDE1, TBC1D2, LRCH1, SGSM2, F2RL1, PTK2B, SPRY1, GNB5, MMUT, PRKG1, BBS4, RAPGEF3, TBC1D10B	621	211	20369	2.79813	0.812608	0.0190265	0.018426	2.79813
GOTERM_BP_FAT	GO:0033993~response to lipid	Response To Lipid	56	8.03443	0.000271108	CDKN1A, BTG2, NCF1, NCF2, SERPINE1, TNFAIP3, ADM, GRIP1, CRHBP, TRIM6, DUSP10, CTSL, PDE4B, PIM1, ANKRD1, HOXA2, HOXA1, JAK2, PSPH, SYK, OSR1, FAM210B, SHPK, LETMD1, PLCB1, CRYAB, TLR2, PFKFB1, CD274, CEBPB, GRN, INSIG2, PTGS2, EFNA5, THBS1, PRDX3, BRINP1, PTK2B, PPARGC1B, PCK2, ESRRA, SMAD2, NOS2, GOT1, TGFB3, NR1D1, LILRB4A, ASS1, TBX2, RAET1A, NFKBIA, KLF9, BCL2, PDE3A, FAS, BCL2L2	621	1111	20369	1.6533	0.819105	0.0192091	0.0186029	1.6533
GOTERM_BP_FAT	GO:0007169~cell surface receptor protein tyrosine kinase signaling pathway	Cell Surface Receptor Protein Tyrosine Kinase Signaling Pathway	28	4.01722	0.000286616	ITGB3, ATP1A3, EFNA5, PAK1, GRB14, PDGFD, PTK2B, CCN2, JAK2, SAMD12, PDK2, ANGPT2, SYK, TIPARP, SORT1, VPS13A, ARID5B, GAB2, MERTK, PGF, TBX2, EREG, VIL1, CASS4, COL4A5, LCP2, PLCB1, HBEGF	621	426	20369	2.15589	0.835962	0.0200822	0.0194485	2.15589
GOTERM_BP_FAT	GO:0034331~cell junction maintenance	Cell Junction Maintenance	10	1.43472	0.000293063	GRN, CNTNAP1, RAB3A, SORT1, ADGRB3, ITGB3, PKP2, F2RL1, KIFC3, PLXNA4	621	71	20369	4.61976	0.842499	0.0203083	0.0196674	4.61976
GOTERM_BP_FAT	GO:0042060~wound healing	Wound Healing	22	3.15638	0.000311503	VKORC1, CARMIL2, CDKN1A, RAB3A, ANGPT2, ITGB3, TFPI2, RAB27A, GP1BA, LILRB4A, MERTK, LYST, PRRG4, PROCR, PAK1, BLOC1S6, RASA3, CHMP2B, F2RL1, CCN1, HBEGF, FERMT3	621	296	20369	2.43786	0.859794	0.0213515	0.0206777	2.43786
GOTERM_BP_FAT	GO:0043085~positive regulation of catalytic activity	Positive Regulation Of Catalytic Activity	36	5.16499	0.000327601	CDKN1A, GRN, RGS16, ITGB3, CIB1, C1QTNF9, ADRB2, THBS1, ARHGAP6, FGD2, SYDE1, PAK1, TERT, SESN2, PIM1, PTK2B, MMUT, JAK2, CCN1, PPARGC1B, FZD5, SYK, RALGAPA1, S100A1, RALGAPA2, APOA2, EREG, TBC1D2, PSRC1, SGSM2, BCL2, CASS4, F2RL1, GNB5, MAP3K13, RAPGEF3	621	617	20369	1.9138	0.873333	0.0222135	0.0215125	1.9138
GOTERM_BP_FAT	GO:0045859~regulation of protein kinase activity	Regulation Of Protein Kinase Activity	30	4.30416	0.000352142	RB1, CDKN1A, ITGB3, SYNPO2, PSEN2, TNFAIP3, CIB1, C1QTNF9, ADRB2, THBS1, FGD2, PAK1, DEPTOR, DUSP10, SESN2, PIM1, PTK2B, JAK2, CCN1, HEXIM2, FZD5, SYK, GADD45A, LILRB4A, EREG, PSRC1, FABP4, CASS4, SPRY1, MAP3K13	621	477	20369	2.06291	0.891499	0.0236235	0.022878	2.06291
GOTERM_BP_FAT	GO:0050890~cognition	Cognition	27	3.87374	0.000358693	SNAP25, BTG2, THRA, PSEN2, ATP1A3, ADRB2, PTGS2, AFF2, BLOC1S6, PAK1, BRINP1, PRKAR2B, MGAT3, HOXA1, PRKCG, GRCC10, CCK, MEIS2, RCAN1, DOP1B, ADGRB3, CHMP2B, CPEB3, SCN2A, PLCB1, RAPGEF3, TLR2	621	409	20369	2.1653	0.895892	0.0238097	0.0230583	2.1653
GOTERM_BP_FAT	GO:0002698~negative regulation of immune effector process	Negative Regulation Of Immune Effector Process	15	2.15208	0.0003698	CD274, GRN, TGFB3, H2-M3, APOA2, TNFAIP3, LILRB4A, SIGLECG, BST2, DUSP10, HLX, SUSD4, MASP1, ZBTB7B, CD55	621	159	20369	3.09437	0.902936	0.024174	0.0234112	3.09437
GOTERM_BP_FAT	GO:0043954~cellular component maintenance	Cellular Component Maintenance	11	1.57819	0.000371849	GRN, CNTNAP1, RAB3A, SORT1, ADGRB3, ITGB3, PKP2, ELMOD3, F2RL1, KIFC3, PLXNA4	621	89	20369	4.05397	0.904183	0.024174	0.0234112	4.05397
GOTERM_BP_FAT	GO:0006520~amino acid metabolic process	Amino Acid Metabolic Process	21	3.01291	0.000378732	THA1, NOS2, HIBADH, GOT1, GPT2, ODC1, PYCR1, PYCR2, HOGA1, PPM1K, ACADSB, THNSL2, ASS1, ALDH6A1, BLOC1S6, DGLUCY, DBT, ALDH1A1, PCBD1, MMUT, PSPH	621	279	20369	2.46884	0.908254	0.0243702	0.0236012	2.46884
GOTERM_BP_FAT	GO:0060284~regulation of cell development	Regulation Of Cell Development	51	7.31707	0.000411882	RB1, BTG2, ITGB3, BHLHE41, DIXDC1, CIB1, GRIP1, DUSP10, GRB14, ZFP365, IL15RA, CDKL3, KLF13, SYK, IL15, MITF, FAM210B, TCTA, HOXB8, PLCB1, TLR2, CEBPB, GRN, H2-M3, CXCR4, EFNA5, FSTL3, PAK1, BRINP1, TERT, HLX, PTK2B, ZBTB7B, ATG7, PPARGC1B, ESRRA, CARMIL2, BTN2A2, TRPV2, NR1D1, LILRB4A, MEIS2, NFKBIA, CDK6, LIN28A, DLG4, BCL2, PDE3A, FAS, MAP3K13, RECK	621	1000	20369	1.67282	0.925568	0.0262356	0.0254077	1.67282

## Sheet: S4. SVR David Up 
Supplemental Table S4. Gene ontology analysis of enoxacin upregulated genes in SVR cells. DAVID gene ontology of increased genes in cells treated with enx compared to DMS with FDR<0.05 and log2 fold change >0.5 (1742 genes).
Category	Term	Clean Term	Count	%	PValue	Genes	List Total	Pop Hits	Pop Total	Fold Enrichment	Bonferroni	Benjamini	FDR
GOTERM_BP_FAT	GO:0009966~regulation of signal transduction	Regulation Of Signal Transduction	373	22.176	7.80717e-20	SERPINE2, ZFYVE9, IFT172, DIXDC1, CBLB, GHITM, RBPJ, NOC2L, PBLD2, FGFRL1, LGALS3, SYNGAP1, ZMIZ1, AKT2, FBXO4, LONP1, CPNE1, SOX9, RPL37, CHAC1, CCN1, PDK2, RPS12, EIF2A, ACVR1, DYNC2H1, EPHA4, DAPK1, IL1R1, UNC5B, GLCE, PAQR3, AFAP1, FRS2, PRKCA, HMGA1B, HCFC2, RUNX2, DKK2, RUNX1, DDIT3, SIK3, KCTD13, SIK2, PLPP3, EZR, ATF6, EPHA2, ATF4, AARS2, DHH, MAOA, NPRL2, NPRL3, PRDM15, TGFA, PIK3R2, GAT…	1509	3267	20369	1.54113	6.79926e-16	6.22302e-16	5.89647e-16
GOTERM_BP_FAT	GO:0051128~regulation of cellular component organization	Regulation Of Cellular Component Organization	325	19.3222	1.4291e-19	RPL4, SERPINE2, EHMT2, AVIL, PPAN, DIXDC1, CBLB, GHITM, GBA2, GOLGA2, LGALS3, LSM11, SYNGAP1, RPS6KA2, OGFOD1, DPYSL3, FBXO4, KAT7, DIP2A, DIP2B, SOX9, ARPIN, TSPYL2, EPHA4, CXADR, SERPINF1, GLCE, PAQR3, ISLR2, PRKCA, ANK1, EML2, EREG, TIAM2, PARD3, FEZ1, HECW2, MAP1A, LETMD1, EZR, ATF5, NGEF, EPHA2, NUMBL, MTMR3, SDC2, MYCBP2, AGAP1, TGFA, NEDD4L, PIK3R2, GATA3, IQGAP1, OMA1, KALRN, C9ORF72, DGU…	1509	2740	20369	1.60108	1.2446e-15	6.22302e-16	5.89647e-16
GOTERM_BP_FAT	GO:1902531~regulation of intracellular signal transduction	Regulation Of Intracellular Signal Transduction	258	15.3389	1.39226e-17	SERPINE2, DIXDC1, NOC2L, SYNGAP1, AKT2, FBXO4, CPNE1, RPL37, CCN1, PDK2, ACVR1, EPHA4, IL1R1, UNC5B, GLCE, PAQR3, FRS2, PRKCA, HMGA1B, HCFC2, DDIT3, SIK3, KCTD13, PLPP3, EZR, ATF6, EPHA2, ATF4, AARS2, NPRL2, NPRL3, PRDM15, TGFA, PIK3R2, GATA3, IQGAP1, C9ORF72, PIK3R5, INPP5F, VPS11, ZBTB7B, SLC19A1, PLK3, STARD13, WDR59, IQSEC2, GADD45A, FZD7, PYCR1, NR1D1, AGO3, CREBRF, SNAI2, ADA, ZFAS1, RPS23R…	1509	2088	20369	1.6679	1.21252e-13	4.04173e-14	3.82964e-14
GOTERM_BP_FAT	GO:0009893~positive regulation of metabolic process	Positive Regulation Of Metabolic Process	406	24.1379	9.04754e-16	MAML2, RBPJ, NOC2L, ZMIZ1, AKT2, ZXDC, HOXA2, DIP2A, DIP2B, MLYCD, PRKAB2, DAPK1, PRKCA, SOX12, HMGA1B, ISL2, HOXB9, RUFY4, DDIT3, LETMD1, ATF5, ATF6, IDO1, ATF4, NPRL2, NPRL3, PRDM15, NEDD4L, GATA3, IQGAP1, PRDM10, C9ORF72, SLC5A3, LARP1, TERT, VPS11, ALX1, ZBTB7B, ATG7, PPARGC1B, ZBTB7C, PLK3, JAG1, WDR59, FZD7, NR1D1, EIF2AK4, ELL2, MLLT11, TADA2B, AGO3, SLC6A9, AGO2, UNC119, MMS19, CPEB3, EZH…	1509	3827	20369	1.43202	7.73515e-12	1.96988e-12	1.86651e-12
GOTERM_BP_FAT	GO:0007399~nervous system development	Nervous System Development	274	16.2901	2.63236e-15	VEZT, SERPINE2, EHMT2, IFT172, AVIL, HDAC11, DIXDC1, WDR89, RBPJ, GBA2, GOLGA2, SYNGAP1, GNAT2, ZMIZ1, AKT2, DPYSL3, CPNE1, HOXA2, KAT8, ADNP2, DIP2A, DIP2B, KIF21B, SOX9, CHAC1, KIFAP3, SCN1A, DYNC2H1, EPHA4, UNC5B, ISLR2, ANK2, FRS2, PRKCA, HMGA1B, SOX12, RUNX2, RUNX1, ISL2, MTHFD1, PARD3, FEZ1, MAP1A, PLPP3, ATF5, ALG10B, NGEF, EPHA2, ATF4, NUMBL, NYAP1, DHH, SDC2, MYCBP2, CEP85L, NEDD4L, GATA…	1509	2341	20369	1.5799	2.32054e-11	4.58504e-12	4.34444e-12
GOTERM_BP_FAT	GO:0023051~regulation of signaling	Regulation Of Signaling	409	24.3163	4.54251e-15	SERPINE2, ZFYVE9, IFT172, GHITM, RBPJ, NOC2L, FGFRL1, SYNGAP1, ZMIZ1, AKT2, RPL37, DAPK1, UNC5B, GLCE, AFAP1, FRS2, PRKCA, HMGA1B, HCFC2, DKK2, DDIT3, MAP1A, ATF6, ATF4, DHH, NPRL2, NPRL3, PRDM15, GATA3, IQGAP1, ADAMTS12, C9ORF72, TERT, CHST11, VPS11, ZBTB7B, ATG7, SLC19A1, PLK3, STARD13, JAG1, WDR59, FZD7, INCA1, FZD9, LNPEP, NR1D1, EIF2AK4, AGO3, SLC6A9, MKS1, SNAI2, CPEB3, CPEB2, ADA, TGFB1I1,…	1509	3901	20369	1.41523	3.96426e-11	6.11705e-12	5.79606e-12
GOTERM_BP_FAT	GO:0010646~regulation of cell communication	Regulation Of Cell Communication	409	24.3163	4.91668e-15	SERPINE2, ZFYVE9, IFT172, GHITM, RBPJ, NOC2L, FGFRL1, SYNGAP1, ZMIZ1, AKT2, RPL37, CXADR, DAPK1, UNC5B, GLCE, AFAP1, FRS2, PRKCA, HMGA1B, HCFC2, DKK2, DDIT3, MAP1A, ATF6, ATF4, DHH, NPRL2, NPRL3, PRDM15, GATA3, IQGAP1, ADAMTS12, C9ORF72, TERT, CHST11, VPS11, ZBTB7B, ATG7, SLC19A1, PLK3, STARD13, JAG1, WDR59, FZD7, INCA1, FZD9, LNPEP, NR1D1, EIF2AK4, AGO3, SLC6A9, MKS1, SNAI2, CPEB3, CPEB2, ADA, T…	1509	3903	20369	1.41451	4.25433e-11	6.11705e-12	5.79606e-12
GOTERM_BP_FAT	GO:0010604~positive regulation of macromolecule metabolic process	Positive Regulation Of Macromolecule Metabolic Process	367	21.8193	1.59839e-13	HDAC10, MAML2, CBLB, RBPJ, IKZF2, NOC2L, GOLGA2, ZMIZ1, RASSF5, RPS6KA2, AKT2, ZXDC, FBXO4, HOXA2, KAT8, KAT7, DIP2A, DIP2B, SOX9, CCN1, EIF2A, ACVR1, EPHA4, IL1R1, ACTN1, PAQR3, ANK2, PRKCA, HMGA1B, SOX12, RUNX2, EREG, RUNX1, ISL2, HOXB9, DDIT3, KCTD13, TRIB3, ZFPM2, PLPP3, EZR, ATF5, ZFPM1, ATF6, IDO1, ATF4, MYCBP2, PRDM15, TGFA, NEDD4L, PIK3R2, GATA3, IQGAP1, PRDM10, PIK3R5, FXR2, LARP1, INPP5…	1509	3491	20369	1.41905	1.39233e-09	1.74005e-10	1.64874e-10
GOTERM_BP_FAT	GO:0009967~positive regulation of signal transduction	Positive Regulation Of Signal Transduction	208	12.3662	1.87123e-12	IFT172, DIXDC1, RBPJ, ZMIZ1, AKT2, CPNE1, RPL37, CCN1, RPS12, EIF2A, ACVR1, DYNC2H1, EPHA4, IL1R1, UNC5B, GLCE, PAQR3, FRS2, PRKCA, DKK2, DDIT3, SIK3, PLPP3, ATF6, DHH, MAOA, PRDM15, TGFA, GATA3, IQGAP1, PIK3R5, TERT, ZBTB7B, SLC19A1, JAG1, WDR59, CRADD, GADD45A, FZD7, INCA1, FZD9, AGO3, CREBRF, ADA, FAF1, TGFB1I1, RPS23RG1, PTPRJ, SH3RF1, EDA2R, CX3CL1, ING2, C1QBP, NCS1, ANKRD1, FGFBP3, NCOA2, …	1509	1740	20369	1.6136	1.6297e-08	1.81073e-09	1.71571e-09
GOTERM_BP_FAT	GO:0009968~negative regulation of signal transduction	Negative Regulation Of Signal Transduction	181	10.761	2.2846e-12	DGKD, SERPINE2, IFT172, WWC1, MPV17L, WWC2, INPPL1, CBLB, RORA, GHITM, TMEM131L, NOC2L, FGFRL1, PBLD2, LGALS3, SYNGAP1, DEPTOR, AKT2, SESN2, LONP1, CPNE1, BANF1, CAPN1, CHAC1, SOX9, TMEM14A, PIAS4, ACVR1, EPHA4, CISH, DAPK1, UNC5B, FST, PAQR3, MAGI2, WNT5A, PRKCA, ATAD3A, RUNX2, DKK2, DDIT3, KCTD13, STAMBP, EZR, ATF4, NDRG4, AARS2, NPRL2, NPRL3, PRDM15, PIK3R2, UBR2, GATA3, ADAMTS12, LTBP1, MTM1,…	1509	1455	20369	1.67918	1.98967e-08	1.98966e-09	1.88525e-09
GOTERM_BP_FAT	GO:0022008~neurogenesis	Neurogenesis	196	11.6528	2.55046e-12	EHMT2, IFT172, HDAC11, RBPJ, GBA2, GOLGA2, SYNGAP1, GNAT2, ZMIZ1, AKT2, DPYSL3, CPNE1, HOXA2, KAT8, DIP2A, SOX9, CHAC1, KIFAP3, DYNC2H1, EPHA4, UNC5B, FRS2, PRKCA, HMGA1B, SOX12, RUNX2, RUNX1, ISL2, PARD3, MAP1A, PLPP3, ATF5, ALG10B, EPHA2, ATF4, NUMBL, NYAP1, DHH, SDC2, MYCBP2, CEP85L, NEDD4L, GATA3, IQGAP1, KALRN, C9ORF72, FLRT3, FLRT1, BLOC1S3, MAP6, ARSG, PIP5K1C, ATG7, JAG1, XRCC5, SS18L1, F…	1509	1617	20369	1.63616	2.22124e-08	2.01927e-09	1.91331e-09
GOTERM_BP_FAT	GO:0009719~response to endogenous stimulus	Response To Endogenous Stimulus	179	10.6421	4.94777e-12	AHCYL1, ZFYVE9, RPS6-PS4, INPPL1, IRS2, MSI1, FGFRL1, NR3C2, ZFP36, ZMIZ1, AKT2, SESN2, LONP1, CAPN1, SOX9, PDK2, PDGFRB, ACVR1, EPHA4, ARSA, PDGFRA, ACSL1, SERPINF1, FST, MAGI2, WNT5A, LMTK2, FRS2, HMGA1B, TICAM1, FRS3, RUNX2, EREG, RUNX1, KIF16B, DDIT3, FEZ1, TRIB3, SIK2, FKBP4, EPHA2, NOTCH2, PFKFB1, DHH, NPR2, STK39, HTRA2, PIK3R2, GATA3, IQGAP1, PLD1, ADAMTS12, LTBP1, RAP1GAP, ZFP36L2, ACACA…	1509	1447	20369	1.6698	4.30906e-08	3.56327e-09	3.37629e-09
GOTERM_BP_FAT	GO:0031401~positive regulation of protein modification process	Positive Regulation Of Protein Modification Process	113	6.71819	5.31893e-12	CBLB, CDC14B, GOLGA2, CCND2, RASSF5, AKT2, SESN2, FBXO4, DIP2A, DIP2B, SOX9, CCN1, MAP3K5, PIAS4, PDGFRB, ACVR1, EPHA4, PDGFRA, WNT5A, PRKCA, TICAM1, EREG, TOM1L1, TRIB3, TNIK, WDFY2, NUPR1, PLPP3, CARD14, NOTCH2, NNMT, SLC1A1, MYCBP2, TGFA, CREBL2, IQGAP1, PIK3R5, BAG4, DVL2, DVL3, SMYD3, ATG7, EGR1, TGFB2, WDR59, LRRN3, BDNF, XRCC5, WFS1, CAV1, INHBA, EIF2AK4, BMP6, BMP4, MAVS, GDNF, CASS4, UNC…	1509	777	20369	1.96308	4.63229e-08	3.56327e-09	3.37629e-09
GOTERM_BP_FAT	GO:0051247~positive regulation of protein metabolic process	Positive Regulation Of Protein Metabolic Process	150	8.91795	1.04993e-11	CBLB, CDC14B, GOLGA2, CCND2, RASSF5, AKT2, SESN2, FBXO4, DIP2A, DIP2B, SOX9, CCN1, MAP3K5, EIF2A, PIAS4, PDGFRB, ACVR1, EPHA4, PDGFRA, PAQR3, WNT5A, PRKCA, TICAM1, EREG, TOM1L1, TRIB3, ADAM8, TNIK, WDFY2, NUPR1, PLPP3, EZR, CARD14, NOTCH2, NNMT, SLC1A1, MYCBP2, TGFA, NEDD4L, UBR3, CREBL2, IQGAP1, PLD1, PIK3R5, BAG4, FXR2, LARP1, VPS11, DVL2, DVL3, SMYD3, ATG7, EGR1, PLK3, TGFB2, WDR59, LRRN3, BDN…	1509	1156	20369	1.75152	9.14381e-08	6.5313e-09	6.18857e-09
GOTERM_BP_FAT	GO:0035556~intracellular signal transduction	Intracellular Signal Transduction	208	12.3662	1.14244e-11	CLPB, CBLB, RRP8, SYNGAP1, ZMIZ1, RPS6KA2, AKT2, KAT7, SOX9, CHAC1, PDK2, EIF2A, DAPK1, ANK2, PRKCA, HMGA1B, RUNX2, TIAM2, ADCY9, DDIT3, SIK3, TRIB3, SIK2, LETMD1, EZR, ATF6, EPHA2, ATF4, NYAP1, PIK3R2, GATA3, IQGAP1, OMA1, RPAP2, KALRN, PIK3R5, LARP1, INPP5F, STC2, PPARGC1B, CCR10, PLK3, CRADD, GADD45A, ERLIN1, RAB39B, NR1D1, EIF2AK4, MLLT11, RGL3, SCN2A, ADA, HERPUD2, MYOM1, RARG, SH3RF1, EDA2R…	1509	1774	20369	1.58267	9.94943e-08	6.63298e-09	6.28492e-09
GOTERM_BP_FAT	GO:0010648~negative regulation of cell communication	Negative Regulation Of Cell Communication	189	11.2366	4.26297e-11	DGKD, SERPINE2, IFT172, WWC1, MPV17L, WWC2, INPPL1, CBLB, RORA, GHITM, TMEM131L, NOC2L, FGFRL1, PBLD2, LGALS3, SYNGAP1, DEPTOR, AKT2, SESN2, LONP1, CPNE1, BANF1, PIM3, CAPN1, CHAC1, SOX9, TMEM14A, PIAS4, ACVR1, EPHA4, CISH, DAPK1, UNC5B, FST, PAQR3, MAGI2, WNT5A, PRKCA, ATAD3A, RUNX2, DKK2, DDIT3, KCTD13, STAMBP, EZR, ATF4, NDRG4, AARS2, NPRL2, NPRL3, PRDM15, PIK3R2, UBR2, GATA3, CABP1, ADAMTS12,…	1509	1592	20369	1.6025	3.71262e-07	2.32039e-08	2.19863e-08
GOTERM_BP_FAT	GO:0031399~regulation of protein modification process	Regulation Of Protein Modification Process	153	9.09631	6.1998e-11	EHMT2, CBLB, CDC14B, GOLGA2, CCND2, DEPTOR, RASSF5, AKT2, SESN2, FBXO4, LONP1, DIP2A, DIP2B, SOX9, CCN1, MAP3K5, TSPYL2, PIAS4, PDGFRB, ACVR1, EPHA4, PDGFRA, PAQR3, WNT5A, PRKCA, CDYL, TICAM1, GTPBP4, EREG, TOM1L1, PARD3, PLAA, TRIB3, TNIK, WDFY2, NUPR1, PLPP3, CARD14, ROPN1, NOTCH2, NNMT, SLC1A1, MYCBP2, TGFA, CREBL2, IQGAP1, C9ORF72, PIK3R5, BAG4, GRK2, INPP5F, DVL2, DVL3, SMYD3, ATG7, EGR1, TG…	1509	1215	20369	1.69979	5.3994e-07	3.17612e-08	3.00945e-08
GOTERM_BP_FAT	GO:0023057~negative regulation of signaling	Negative Regulation Of Signaling	188	11.1772	6.81591e-11	DGKD, SERPINE2, IFT172, WWC1, MPV17L, WWC2, INPPL1, CBLB, RORA, GHITM, TMEM131L, NOC2L, FGFRL1, PBLD2, LGALS3, SYNGAP1, DEPTOR, AKT2, SESN2, LONP1, CPNE1, BANF1, PIM3, CAPN1, CHAC1, SOX9, TMEM14A, PIAS4, ACVR1, EPHA4, CISH, DAPK1, UNC5B, FST, PAQR3, MAGI2, WNT5A, PRKCA, ATAD3A, RUNX2, DKK2, DDIT3, KCTD13, STAMBP, EZR, ATF4, NDRG4, AARS2, NPRL2, NPRL3, PRDM15, PIK3R2, UBR2, GATA3, ADAMTS12, KALRN,…	1509	1590	20369	1.59603	5.93598e-07	3.29777e-08	3.12472e-08
GOTERM_BP_FAT	GO:0009056~catabolic process	Catabolic Process	237	14.0904	8.53007e-11	MTRR, SERPINE2, HDAC10, POP1, PREP, CBLB, GBA2, ANPEP, LIPG, FBXO4, LONP1, MLYCD, CHAC1, VPS39, ARSA, IAH1, NHLRC3, ACSL1, MCCC1, HMGA1B, GTPBP2, ASRGL1, CYP27A1, RNF123, PLPP6, RUFY4, CLPP, DDIT3, HECW2, ACOT2, KCTD13, IDO1, MAOA, NEDD4L, OMA1, ADAMTS12, C9ORF72, UGT1A7C, PRDX3, INPP5F, DHX34, VPS11, DECR2, ATG7, PCK2, GSTM4, LRBA, ERLIN1, RAB39B, LNPEP, NR1D1, STAM, PAFAH2, ALDH6A1, NCEH1, AGO3…	1509	2138	20369	1.49631	7.42883e-07	3.87697e-08	3.67353e-08
GOTERM_BP_FAT	GO:0048699~generation of neurons	Generation Of Neurons	168	9.98811	8.98317e-11	PRDM8, SEMA5A, RAB3A, EHMT2, IFT172, RORA, RBPJ, GBA2, ACTG1, GOLGA2, SYNGAP1, NAGLU, GNAT2, ZMIZ1, DPYSL3, CPNE1, HOXA2, NRCAM, DIP2A, SOX9, KIFAP3, DYNC2H1, EPHA4, CDKL3, LMO4, UNC5B, WNT5A, LMTK2, PRKCA, FRS2, UBE4B, SOX12, RUNX2, RUNX1, ISL2, MAP1A, TNIK, ATF5, ALG10B, VCL, EPHA2, ATF4, NUMBL, AKNA, NYAP1, ARHGEF28, SDC2, NPR2, CEP85L, MYCBP2, NEDD4L, HTRA2, GATA3, IQGAP1, KALRN, C9ORF72, CAM…	1509	1380	20369	1.64328	7.82344e-07	3.87697e-08	3.67353e-08
GOTERM_BP_FAT	GO:0009891~positive regulation of biosynthetic process	Positive Regulation Of Biosynthetic Process	301	17.8954	9.34854e-11	MAML2, RBPJ, IKZF2, NOC2L, GOLGA2, ZMIZ1, RPS6KA2, AKT2, ZXDC, FBXO4, HOXA2, KAT8, KAT7, SOX9, CCN1, ACVR1, IL1R1, ACTN1, PAQR3, ANK2, HMGA1B, SOX12, RUNX2, EREG, RUNX1, ISL2, HOXB9, DDIT3, ZFPM2, EZR, ATF5, ZFPM1, ATF6, IDO1, ATF4, PRDM15, PIK3R2, GATA3, PRDM10, SLC5A3, FXR2, LARP1, TERT, DHX34, ALX1, ZBTB7B, PPARGC1B, ZBTB7C, STAT5A, EGR1, CARMIL2, JAG1, XRCC5, FZD7, SS18L1, NR1D1, EIF2AK4, SMA…	1509	2875	20369	1.41322	8.14163e-07	3.87697e-08	3.67353e-08
GOTERM_BP_FAT	GO:0042325~regulation of phosphorylation	Regulation Of Phosphorylation	131	7.78835	1.94189e-10	IRS2, CCND2, DEPTOR, AKT2, SESN2, LONP1, SOX9, CCN1, MAP3K5, TSPYL2, PDGFRB, ACVR1, EPHA4, PDGFRA, LMO4, PAQR3, WNT5A, PRKCA, GTPBP4, EREG, TOM1L1, PARD3, TRIB3, TNIK, WDFY2, PLPP3, CARD14, ROPN1, NOTCH2, NPRL2, SLC1A1, TGFA, CREBL2, IQGAP1, C9ORF72, PIK3R5, PRDX3, BAG4, GRK2, INPP5F, DHX34, DVL2, DVL3, SMYD3, PPARGC1B, TGFB2, WDR59, LRRN3, BDNF, XRCC5, GADD45A, FZD7, CAV1, INCA1, INHBA, EIF2AK4,…	1509	1005	20369	1.75949	1.69119e-06	7.68724e-08	7.28385e-08
GOTERM_BP_FAT	GO:0030182~neuron differentiation	Neuron Differentiation	158	9.39358	2.89727e-10	PRDM8, SEMA5A, RAB3A, EHMT2, IFT172, RORA, RBPJ, GBA2, ACTG1, GOLGA2, SYNGAP1, NAGLU, GNAT2, ZMIZ1, DPYSL3, CPNE1, HOXA2, NRCAM, DIP2A, SOX9, DYNC2H1, EPHA4, CDKL3, LMO4, UNC5B, WNT5A, LMTK2, PRKCA, UBE4B, SOX12, RUNX2, RUNX1, ISL2, MAP1A, TNIK, ATF5, ALG10B, VCL, EPHA2, ATF4, NUMBL, NYAP1, ARHGEF28, SDC2, NPR2, MYCBP2, NEDD4L, HTRA2, GATA3, IQGAP1, KALRN, C9ORF72, CAMSAP1, EFNB1, ATXN2, FLRT3, T…	1509	1294	20369	1.64817	2.52323e-06	1.09706e-07	1.03949e-07
GOTERM_BP_FAT	GO:1902533~positive regulation of intracellular signal transduction	Positive Regulation Of Intracellular Signal Transduction	152	9.03686	3.16964e-10	SEMA5A, STEAP3, WWC1, DIXDC1, IRS2, NR3C2, SESN2, CPNE1, RPL37, MAP3K5, PIAS4, PDGFRB, ACVR1, EPHA4, GUCY1A2, PDGFRA, IL1R1, UNC5B, GLCE, PAQR3, WNT5A, PRKCA, FRS2, TICAM1, DDIT3, SIK3, ADAM8, TNIK, NUPR1, PLPP3, ATF6, CARD14, NOTCH2, NDRG4, NPR2, STK39, TGFA, GATA3, IQGAP1, PIK3R5, BAG4, NACC2, DVL2, DVL3, IGFBP6, ZBTB7B, MARK4, SLC19A1, KLHDC10, OSBPL8, TGFB2, WDR59, BDNF, TGFB3, GADD45A, FZD7,…	1509	1232	20369	1.66538	2.76044e-06	1.1055e-07	1.04749e-07
GOTERM_BP_FAT	GO:0019220~regulation of phosphate metabolic process	Regulation Of Phosphate Metabolic Process	144	8.56124	3.24918e-10	IRS2, CCND2, DEPTOR, AKT2, SESN2, LONP1, SOX9, CCN1, PDK2, MAP3K5, TSPYL2, PDGFRB, ACVR1, EPHA4, PDGFRA, LMO4, PAQR3, WNT5A, PRKCA, GTPBP4, EREG, TOM1L1, BSCL2, PARD3, TRIB3, TNIK, SIK2, WDFY2, NUPR1, PLPP3, CARD14, ROPN1, NOTCH2, PFKFB1, MTMR3, NPRL2, SLC1A1, TGFA, CREBL2, IQGAP1, C9ORF72, PIK3R5, PRDX3, BAG4, GRK2, INPP5F, DHX34, DVL2, DVL3, SMYD3, PPARGC1B, TMEM132C, TGFB2, WDR59, LRRN3, BDNF,…	1509	1148	20369	1.69317	2.82971e-06	1.1055e-07	1.04749e-07
GOTERM_BP_FAT	GO:0019752~carboxylic acid metabolic process	Carboxylic Acid Metabolic Process	114	6.77765	3.44438e-10	PECR, MTRR, ALDH1L2, GBA2, FADS3, SESN2, LIPG, MLYCD, MMUT, PSPH, PRKAB2, ST6GAL1, ACSL1, GPT2, OXSM, MCCC1, THNSL2, ASRGL1, CYP27A1, ALDH3A2, CYP2U1, MTHFD1, MTHFD2, ACOT2, PLAA, IDO1, GNE, ATF4, SHMT2, AASDH, ACACA, TKFC, THEM4, HACL1, DECR2, PCK2, GSTM4, GOT1, PYCR1, ASNS, MCAT, CYP4F13, ALDH6A1, AMACR, ADI1, UST, KYAT3, ECHDC2, ECHDC3, KYAT1, ALDH18A1, NIT2, GSTM7, DAGLA, HIBADH, ADPGK, RDH9,…	1509	841	20369	1.82974	2.99971e-06	1.1055e-07	1.04749e-07
GOTERM_BP_FAT	GO:0042127~regulation of cell population proliferation	Regulation Of Cell Population Proliferation	212	12.604	3.6124e-10	SERPINE2, IFT172, CBLB, RBPJ, IFI30, FGFRL1, LGALS3, ZMIZ1, RASSF5, RPS6KA2, FBXO4, KAT7, SOX9, CCN1, KIFAP3, EPHA4, ST6GAL1, CXADR, SERPINF1, GLCE, P3H2, FRS2, PRKCA, HMGA1B, RUNX2, GTPBP4, EREG, RUNX1, ZFPM2, ATF5, IDO1, SHMT2, TGFA, GATA3, PRDX3, TERT, CHST11, ZBTB7B, ZBTB7C, STAT5A, EGR1, CARMIL2, JAG1, XRCC5, FZD7, INCA1, FZD9, NR1D1, SMARCA1, H19, AGO3, MKS1, SNAI2, ADA, RARG, ZFAS1, IL24, …	1509	1888	20369	1.5157	3.14603e-06	1.1055e-07	1.04749e-07
GOTERM_BP_FAT	GO:0043436~oxoacid metabolic process	Oxoacid Metabolic Process	116	6.89655	3.66135e-10	PECR, MTRR, ALDH1L2, GBA2, FADS3, SESN2, LIPG, MLYCD, MMUT, PSPH, PRKAB2, ST6GAL1, ACSL1, GPT2, OXSM, MCCC1, THNSL2, ASRGL1, CYP27A1, ALDH3A2, CYP2U1, MTHFD1, MTHFD2, ACOT2, PLAA, IDO1, GNE, ATF4, SHMT2, AASDH, ACACA, TKFC, THEM4, HACL1, DECR2, PCK2, GSTM4, GOT1, PYCR1, ASNS, MCAT, CYP4F13, ALDH6A1, AMACR, ADI1, UST, KYAT3, ECHDC2, ECHDC3, KYAT1, ALDH18A1, NIT2, GSTM7, FGFR1, DAGLA, HIBADH, ADPGK…	1509	862	20369	1.81648	3.18867e-06	1.1055e-07	1.04749e-07
GOTERM_BP_FAT	GO:0051174~regulation of phosphorus metabolic process	Regulation Of Phosphorus Metabolic Process	144	8.56124	3.6812e-10	IRS2, CCND2, DEPTOR, AKT2, SESN2, LONP1, SOX9, CCN1, PDK2, MAP3K5, TSPYL2, PDGFRB, ACVR1, EPHA4, PDGFRA, LMO4, PAQR3, WNT5A, PRKCA, GTPBP4, EREG, TOM1L1, BSCL2, PARD3, TRIB3, TNIK, SIK2, WDFY2, NUPR1, PLPP3, CARD14, ROPN1, NOTCH2, PFKFB1, MTMR3, NPRL2, SLC1A1, TGFA, CREBL2, IQGAP1, C9ORF72, PIK3R5, PRDX3, BAG4, GRK2, INPP5F, DHX34, DVL2, DVL3, SMYD3, PPARGC1B, TMEM132C, TGFB2, WDR59, LRRN3, BDNF,…	1509	1150	20369	1.69023	3.20596e-06	1.1055e-07	1.04749e-07
GOTERM_BP_FAT	GO:0051246~regulation of protein metabolic process	Regulation Of Protein Metabolic Process	225	13.3769	4.12924e-10	SERPINE2, EHMT2, CBLB, LDLRAD3, GOLGA2, RASSF5, RPS6KA2, OGFOD1, AKT2, LIPG, FBXO4, LONP1, DIP2A, DIP2B, SOX9, CHAC1, CCN1, EIF2A, TSPYL2, ACVR1, EPHA4, DAPK1, PAQR3, PRKCA, GTPBP4, EREG, PARD3, MAP1A, TRIB3, PLPP3, EZR, ROPN1, SHMT2, MYCBP2, TGFA, NEDD4L, IQGAP1, C9ORF72, PIK3R5, INPP5B, FXR2, LARP1, INPP5F, VPS11, ATG7, EGR1, PLK3, WDR59, LRRN3, XRCC5, GADD45A, INCA1, EIF2AK4, STFA2, AGO3, SLC6…	1509	2037	20369	1.49098	3.59615e-06	1.19872e-07	1.13582e-07
GOTERM_BP_FAT	GO:0042327~positive regulation of phosphorylation	Positive Regulation Of Phosphorylation	93	5.52913	5.26294e-10	BCAR3, DOCK7, IL24, LRRK1, PTPRJ, HTR2A, VLDLR, CX3CL1, CCND2, AKT2, SESN2, FLOT1, SOX9, CCN1, MAP3K5, PDGFRB, ACVR1, EPHA4, PDGFRA, GPR39, LMO4, AKTIP, WNT5A, PRKCA, NRG1, NGF, EREG, RGMA, TOM1L1, ZEB2, CEACAM1, PSRC1, HAX1, TRAF4, TLR6, TNIK, WDFY2, PLPP3, MET, CARD14, ARHGEF5, CD44, RAPGEF3, DDR2, HBEGF, PPP1R15A, NOTCH2, PELI2, SLC1A1, TGFA, AKAP6, CREBL2, IQGAP1, PTGS2, WDR24, THBS1, EGFR, P…	1509	640	20369	1.96148	4.58349e-06	1.43247e-07	1.3573e-07
GOTERM_BP_FAT	GO:0071495~cellular response to endogenous stimulus	Cellular Response To Endogenous Stimulus	135	8.02616	5.2634e-10	AHCYL1, ZFYVE9, IRS2, FGFRL1, NR3C2, ZFP36, ZMIZ1, AKT2, SOX9, PDK2, PDGFRB, ACVR1, EPHA4, PDGFRA, ACSL1, SERPINF1, FST, MAGI2, WNT5A, LMTK2, FRS2, HMGA1B, FRS3, RUNX2, RUNX1, KIF16B, FEZ1, TRIB3, SIK2, FKBP4, EPHA2, NOTCH2, HTRA2, PIK3R2, GATA3, IQGAP1, ADAMTS12, LTBP1, RAP1GAP, ZFP36L2, ACACA, SOCS2, FAM83G, BAG4, GRK2, CHST11, FLRT3, UBR5, FLRT1, EIF4EBP1, SMYD3, SOCS7, PPARGC1B, PCK2, STAT5A,…	1509	1062	20369	1.71589	4.58388e-06	1.43247e-07	1.3573e-07
GOTERM_BP_FAT	GO:0006082~organic acid metabolic process	Organic Acid Metabolic Process	117	6.956	5.51382e-10	PECR, MTRR, ALDH1L2, GBA2, FADS3, SESN2, LIPG, MLYCD, MMUT, PSPH, PRKAB2, ST6GAL1, ACSL1, GPT2, OXSM, MCCC1, THNSL2, ASRGL1, CYP27A1, ALDH3A2, CYP2U1, MTHFD1, MTHFD2, ACOT2, PLAA, IDO1, GNE, ATF4, SHMT2, AASDH, ACACA, TKFC, THEM4, HACL1, DECR2, PCK2, GSTM4, STAT5A, GOT1, PYCR1, ASNS, MCAT, CYP4F13, ALDH6A1, AMACR, ADI1, UST, KYAT3, ECHDC2, ECHDC3, KYAT1, ALDH18A1, NIT2, GSTM7, FGFR1, DAGLA, HIBAD…	1509	878	20369	1.79875	4.80198e-06	1.45515e-07	1.37879e-07
GOTERM_BP_FAT	GO:0010557~positive regulation of macromolecule biosynthetic process	Positive Regulation Of Macromolecule Biosynthetic Process	285	16.9441	7.11486e-10	MAML2, RBPJ, IKZF2, NOC2L, GOLGA2, ZMIZ1, RPS6KA2, AKT2, ZXDC, FBXO4, HOXA2, KAT8, KAT7, SOX9, CCN1, ACVR1, IL1R1, ACTN1, ANK2, HMGA1B, SOX12, RUNX2, EREG, RUNX1, ISL2, HOXB9, DDIT3, ZFPM2, EZR, ATF5, ZFPM1, ATF6, IDO1, ATF4, PRDM15, PIK3R2, GATA3, PRDM10, FXR2, LARP1, TERT, DHX34, ALX1, ZBTB7B, PPARGC1B, ZBTB7C, STAT5A, EGR1, CARMIL2, JAG1, XRCC5, FZD7, SS18L1, NR1D1, EIF2AK4, SMARCA1, ELL2, TAD…	1509	2740	20369	1.40402	6.19631e-06	1.82245e-07	1.72682e-07
GOTERM_BP_FAT	GO:0001932~regulation of protein phosphorylation	Regulation Of Protein Phosphorylation	123	7.31272	1.05516e-09	CCND2, DEPTOR, AKT2, SESN2, LONP1, SOX9, CCN1, MAP3K5, TSPYL2, PDGFRB, ACVR1, EPHA4, PDGFRA, PAQR3, WNT5A, PRKCA, GTPBP4, EREG, TOM1L1, PARD3, TRIB3, TNIK, WDFY2, PLPP3, CARD14, ROPN1, NOTCH2, SLC1A1, TGFA, CREBL2, IQGAP1, C9ORF72, PIK3R5, BAG4, GRK2, INPP5F, DVL2, DVL3, SMYD3, TGFB2, WDR59, LRRN3, BDNF, XRCC5, GADD45A, CAV1, INCA1, INHBA, EIF2AK4, BMP6, BMP4, MAVS, GDNF, TADA3, CASS4, ZFP592, UN…	1509	949	20369	1.74952	9.18933e-06	2.62554e-07	2.48776e-07
GOTERM_BP_FAT	GO:0048584~positive regulation of response to stimulus	Positive Regulation Of Response To Stimulus	262	15.5767	1.42273e-09	CLPB, HDAC10, IFT172, DIXDC1, CBLB, RBPJ, ZMIZ1, AKT2, CPNE1, RPL37, CCN1, RPS12, EIF2A, ACVR1, DYNC2H1, EPHA4, IL1R1, UNC5B, GLCE, PAQR3, FRS2, PRKCA, DKK2, EREG, DDIT3, SIK3, LETMD1, PLPP3, ATF6, IDO1, DHH, MAOA, PRDM15, TGFA, GATA3, IQGAP1, PIK3R5, TERT, ZBTB7B, RAB11FIP2, SLC19A1, STAT5A, CARMIL2, JAG1, WDR59, CRADD, XRCC5, GADD45A, FZD7, INCA1, FZD9, EIF2AK4, AGO3, CREBRF, SNAI2, ECHDC3, ADA…	1509	2490	20369	1.42031	1.23904e-05	3.44181e-07	3.2612e-07
GOTERM_BP_FAT	GO:0001934~positive regulation of protein phosphorylation	Positive Regulation Of Protein Phosphorylation	89	5.29132	1.46349e-09	BCAR3, DOCK7, IL24, LRRK1, PTPRJ, HTR2A, VLDLR, CX3CL1, CCND2, AKT2, SESN2, FLOT1, SOX9, CCN1, MAP3K5, PDGFRB, ACVR1, EPHA4, PDGFRA, GPR39, AKTIP, WNT5A, PRKCA, NRG1, NGF, EREG, RGMA, TOM1L1, ZEB2, CEACAM1, PSRC1, HAX1, TRAF4, TLR6, TNIK, WDFY2, PLPP3, MET, CARD14, ARHGEF5, CD44, RAPGEF3, DDR2, HBEGF, PPP1R15A, NOTCH2, PELI2, SLC1A1, TGFA, AKAP6, CREBL2, IQGAP1, PTGS2, WDR24, THBS1, EGFR, PIK3R5,…	1509	614	20369	1.9566	1.27455e-05	3.44474e-07	3.26398e-07
GOTERM_BP_FAT	GO:0023056~positive regulation of signaling	Positive Regulation Of Signaling	229	13.6147	1.63644e-09	SERPINE2, IFT172, DIXDC1, RBPJ, ZMIZ1, AKT2, CPNE1, RPL37, CCN1, RPS12, EIF2A, ACVR1, DYNC2H1, EPHA4, IL1R1, UNC5B, GLCE, PAQR3, FRS2, PRKCA, DKK2, RUNX1, DDIT3, SIK3, KCTD13, PLPP3, ATF6, DHH, MAOA, PRDM15, TGFA, GATA3, IQGAP1, PIK3R5, INPP5F, TERT, ZBTB7B, ATG7, SLC19A1, PCK2, JAG1, WDR59, CRADD, IQSEC2, GADD45A, FZD7, INCA1, FZD9, EIF2AK4, AGO3, CREBRF, CPEB3, ADA, FAF1, TGFB1I1, RPS23RG1, PTP…	1509	2114	20369	1.46221	1.42517e-05	3.75047e-07	3.55367e-07
GOTERM_BP_FAT	GO:0019538~protein metabolic process	Protein Metabolic Process	363	21.5815	1.79882e-09	RPL4, RPL14-PS1, RPL3, SERPINE2, RPL32, EHMT2, IFT172, PREP, CBLB, RPL6, RPL7, GOLGA2, NFU1, KRTCAP2, RPS17, RPS18, ZMIZ1, RPS6KA2, OGFOD1, AKT2, ANPEP, FBXO4, LONP1, CPNE1, KAT7, SOX9, RPL37, USP17LC, EARS2, RPS12, EIF2A, DYNC2H1, EPHA4, ST6GAL1, NHLRC3, DAPK1, GLCE, PAQR3, P3H2, MOGS, PRKCA, GTPBP2, ASRGL1, RNF123, PLPP6, CLPP, DDIT3, HECW2, SIK3, TTLL13, KCTD13, SIK2, UQCRC2, RPL29, ALG10B, NU…	1509	3696	20369	1.32573	1.56658e-05	4.01691e-07	3.80612e-07
GOTERM_BP_FAT	GO:0048585~negative regulation of response to stimulus	Negative Regulation Of Response To Stimulus	208	12.3662	1.89627e-09	SERPINE2, IFT172, CBLB, GHITM, NOC2L, PBLD2, FGFRL1, LGALS3, SYNGAP1, AKT2, LONP1, CPNE1, SOX9, CHAC1, ACVR1, EPHA4, ST6GAL1, DAPK1, UNC5B, PAQR3, PRKCA, RUNX2, DKK2, DDIT3, KCTD13, EZR, ATF4, AARS2, NPRL2, NPRL3, PRDM15, PIK3R2, GATA3, ADAMTS12, C9ORF72, INPP5F, TERT, CHST11, VPS11, ZBTB7B, STAT5A, EGR1, PLK3, FZD9, PYCR1, NR1D1, CREBRF, SNAI2, ADA, INVS, OGG1, SNX13, PTPRJ, SH3RF1, CX3CL1, HERP…	1509	1880	20369	1.49343	1.65145e-05	4.12866e-07	3.91201e-07
GOTERM_BP_FAT	GO:0045937~positive regulation of phosphate metabolic process	Positive Regulation Of Phosphate Metabolic Process	98	5.8264	2.19675e-09	CCND2, AKT2, SESN2, SOX9, CCN1, MAP3K5, PDGFRB, ACVR1, EPHA4, PDGFRA, LMO4, WNT5A, PRKCA, EREG, TOM1L1, TNIK, WDFY2, PLPP3, CARD14, NOTCH2, PFKFB1, SLC1A1, TGFA, CREBL2, IQGAP1, PIK3R5, BAG4, DHX34, DVL2, DVL3, SMYD3, PPARGC1B, TGFB2, WDR59, LRRN3, BDNF, XRCC5, FZD7, CAV1, INHBA, EIF2AK4, BMP6, BMP4, MAVS, GDNF, CASS4, UNC119, TAB2, MAP3K13, FGFR1, BCAR3, LRRK1, DOCK7, IL24, PTPRJ, VLDLR, HTR2A, …	1509	707	20369	1.87106	1.91313e-05	4.55512e-07	4.31609e-07
GOTERM_BP_FAT	GO:0010562~positive regulation of phosphorus metabolic process	Positive Regulation Of Phosphorus Metabolic Process	98	5.8264	2.19675e-09	CCND2, AKT2, SESN2, SOX9, CCN1, MAP3K5, PDGFRB, ACVR1, EPHA4, PDGFRA, LMO4, WNT5A, PRKCA, EREG, TOM1L1, TNIK, WDFY2, PLPP3, CARD14, NOTCH2, PFKFB1, SLC1A1, TGFA, CREBL2, IQGAP1, PIK3R5, BAG4, DHX34, DVL2, DVL3, SMYD3, PPARGC1B, TGFB2, WDR59, LRRN3, BDNF, XRCC5, FZD7, CAV1, INHBA, EIF2AK4, BMP6, BMP4, MAVS, GDNF, CASS4, UNC119, TAB2, MAP3K13, FGFR1, BCAR3, LRRK1, DOCK7, IL24, PTPRJ, VLDLR, HTR2A, …	1509	707	20369	1.87106	1.91313e-05	4.55512e-07	4.31609e-07
GOTERM_BP_FAT	GO:0043067~regulation of programmed cell death	Regulation Of Programmed Cell Death	201	11.9501	2.41636e-09	CBLB, GHITM, NOC2L, LGALS3, SYNGAP1, RPS6KA2, AKT2, RASSF6, SOX9, CCN1, KIFAP3, USP17LC, ACVR1, EPHA4, ST6GAL1, DAPK1, UNC5B, ANK2, FRS2, PRKCA, DDIT3, ATF5, ATF6, IDO1, ATF4, TGFA, GATA3, OMA1, PRDX3, TERT, CHST11, ATG7, STAT5A, EGR1, PLK3, CDSN, CRADD, GADD45A, INCA1, FZD9, PYCR1, PAFAH2, MLLT11, SNAI2, ADA, RARG, FAF1, ZFAS1, OGG1, IL24, SLC7A11, SH3RF1, CX3CL1, HERPUD1, RNF157, BABAM2, ING2, …	1509	1805	20369	1.50314	2.10439e-05	4.89397e-07	4.63716e-07
GOTERM_BP_FAT	GO:0048812~neuron projection morphogenesis	Neuron Projection Morphogenesis	83	4.9346	2.5078e-09	SEMA5A, PRDM8, CNTNAP1, RAB3A, DOCK7, PTPRJ, VLDLR, ACTG1, GOLGA2, SYNGAP1, BCL7A, TCTN1, FLOT1, CPNE1, HOXA2, NRCAM, DIP2A, EMB, SPG11, NEO1, EPHA4, CDKL3, DST, LMO4, UNC5B, WNT5A, PRMT3, VPS13A, LMTK2, PRKCA, NGF, ENAH, ISL2, ZEB2, MAP1A, TNIK, VCL, NUMBL, NYAP1, LRP1, SEMA3C, LAMA1, ARHGEF28, SDC2, SRF, NPR2, MYCBP2, NTN4, IQGAP1, PRICKLE1, GATA3, KALRN, C9ORF72, EGFR, EFNB1, ATXN2, FLRT3, FLR…	1509	563	20369	1.98999	2.18402e-05	4.96374e-07	4.70327e-07
GOTERM_BP_FAT	GO:0010647~positive regulation of cell communication	Positive Regulation Of Cell Communication	228	13.5553	2.58306e-09	SERPINE2, IFT172, DIXDC1, RBPJ, ZMIZ1, AKT2, CPNE1, RPL37, CCN1, RPS12, EIF2A, ACVR1, DYNC2H1, EPHA4, IL1R1, UNC5B, GLCE, PAQR3, FRS2, PRKCA, DKK2, RUNX1, DDIT3, SIK3, KCTD13, PLPP3, ATF6, DHH, MAOA, PRDM15, TGFA, GATA3, IQGAP1, PIK3R5, TERT, ZBTB7B, ATG7, SLC19A1, PCK2, JAG1, WDR59, CRADD, IQSEC2, GADD45A, FZD7, INCA1, FZD9, EIF2AK4, AGO3, CREBRF, CPEB3, ADA, FAF1, TGFB1I1, RPS23RG1, PTPRJ, DOC2…	1509	2113	20369	1.45652	2.24956e-05	4.99908e-07	4.73675e-07
GOTERM_BP_FAT	GO:0007167~enzyme-linked receptor protein signaling pathway	Enzyme-Linked Receptor Protein Signaling Pathway	91	5.41023	2.69207e-09	BCAR3, ITGB5, ZFYVE9, IRS2, PTPRJ, PTPRK, FGFRL1, ZMIZ1, AKT2, SOX9, GIT1, PDK2, PDGFRB, ACVR1, EPHA4, PDGFRA, FGFBP1, FST, WNT5A, MAGI2, VPS13A, LMTK2, FRS2, NRG1, HMGA1B, GAB2, NGF, SLC39A14, FRS3, RUNX2, EREG, RGMA, TOM1L1, TGFBR3, KIF16B, COL4A5, PPARG, SIK2, SOS1, MET, SOS2, NGEF, EPHA2, DDR2, HBEGF, NOTCH2, FOXC1, LRP1, NPR2, TGFA, PIK3R2, IQGAP1, PRICKLE1, LTBP1, EGFR, SOCS2, FAM83G, EFNB1…	1509	641	20369	1.9163	2.3445e-05	5.09679e-07	4.82934e-07
GOTERM_BP_FAT	GO:0002181~cytoplasmic translation	Cytoplasmic Translation	35	2.08086	3.73635e-09	RPL4, RPL3, RPL32, RPS6-PS4, RPL10A, RPL6, RPL7, RPS4X, RPL7A, RPS17, RPS15A, RPS18, RPS3, EIF4EBP1, RPL37, RPL18, RPL17, EIF4B, RPS12, EIF2B3, RPL23A, EIF2S2, RPS26, RPS25, EIF3L, RPS29, RPL27A, EIF3I, RPL22L1, DHX29, EIF3F, EIF3C, RPL29, RPL37RT, RPS24	1509	151	20369	3.12876	3.25393e-05	6.92337e-07	6.56007e-07
GOTERM_BP_FAT	GO:0007417~central nervous system development	Central Nervous System Development	135	8.02616	4.0021e-09	PRDM8, SEMA5A, SERPINE2, IFT172, HDAC11, DIXDC1, IRS2, MSI1, RORA, MSI2, WDR89, RBPJ, GBA2, NAGLU, ZMIZ1, HOXA2, NRCAM, KIF21B, SOX9, DYNC2H1, PIAS4, EPHA4, LMO4, WNT5A, PRKCA, FRS2, SOX12, RUNX1, ALDH3A2, ISL2, FANCD2, FEZ1, PLPP3, ATF5, EPHA2, NUMBL, AKNA, ARHGEF28, SLC1A1, MYCBP2, HTRA2, FUT1, AK8, GLIS2, DHX30, ATXN2, GRK2, FXR2, STK36, TTC21B, PLXNA1, DVL3, ATG7, SOCS7, PLXNA4, ZBTB18, EIF2B…	1509	1096	20369	1.66266	3.48537e-05	7.26131e-07	6.88027e-07
GOTERM_BP_FAT	GO:0120039~plasma membrane bounded cell projection morphogenesis	Plasma Membrane Bounded Cell Projection Morphogenesis	83	4.9346	4.16467e-09	SEMA5A, PRDM8, CNTNAP1, RAB3A, DOCK7, PTPRJ, VLDLR, ACTG1, GOLGA2, SYNGAP1, BCL7A, TCTN1, FLOT1, CPNE1, HOXA2, NRCAM, DIP2A, EMB, SPG11, NEO1, EPHA4, CDKL3, DST, LMO4, UNC5B, WNT5A, PRMT3, VPS13A, LMTK2, PRKCA, NGF, ENAH, ISL2, ZEB2, MAP1A, TNIK, VCL, NUMBL, NYAP1, LRP1, SEMA3C, LAMA1, ARHGEF28, SDC2, SRF, NPR2, MYCBP2, NTN4, IQGAP1, PRICKLE1, GATA3, KALRN, C9ORF72, EGFR, EFNB1, ATXN2, FLRT3, FLR…	1509	569	20369	1.969	3.62695e-05	7.40207e-07	7.01365e-07
GOTERM_BP_FAT	GO:0046394~carboxylic acid biosynthetic process	Carboxylic Acid Biosynthetic Process	51	3.0321	4.41048e-09	PECR, MTRR, RDH9, ASNSD1, MTR, FADS3, DSE, LIPG, PHGDH, MLYCD, PSPH, PRKAB2, ACSL1, OXSM, CAD, PLA2G4A, ELOVL7, THNSL2, CYP27A1, ACOX2, MTHFD1, MTHFD2, BCAT1, IDO1, GNE, PRKAA2, ACSS2, SHMT2, PTGS2, HSD17B10, ACACA, SRR, MTHFD1L, DECR2, CBR4, GSTM4, GOT1, PNPLA8, PYCR1, ASNS, MCAT, ASS1, PER2, AMACR, DHRS9, PSAT1, ADI1, CTH, UST, ALDH18A1, GSTM7	1509	279	20369	2.46744	3.84101e-05	7.68217e-07	7.27905e-07
GOTERM_BP_FAT	GO:0042981~regulation of apoptotic process	Regulation Of Apoptotic Process	195	11.5933	5.08848e-09	CBLB, GHITM, NOC2L, LGALS3, SYNGAP1, RPS6KA2, AKT2, RASSF6, SOX9, CCN1, KIFAP3, USP17LC, ACVR1, EPHA4, ST6GAL1, DAPK1, UNC5B, ANK2, FRS2, PRKCA, DDIT3, ATF5, ATF6, IDO1, ATF4, TGFA, GATA3, OMA1, PRDX3, TERT, CHST11, ATG7, STAT5A, EGR1, PLK3, CRADD, GADD45A, INCA1, FZD9, PYCR1, PAFAH2, MLLT11, SNAI2, ADA, RARG, FAF1, ZFAS1, OGG1, IL24, SLC7A11, SH3RF1, CX3CL1, HERPUD1, RNF157, BABAM2, ING2, ADAMTS…	1509	1755	20369	1.49982	4.43146e-05	8.68933e-07	8.23336e-07
GOTERM_BP_FAT	GO:0016053~organic acid biosynthetic process	Organic Acid Biosynthetic Process	51	3.0321	7.20417e-09	PECR, MTRR, RDH9, ASNSD1, MTR, FADS3, DSE, LIPG, PHGDH, MLYCD, PSPH, PRKAB2, ACSL1, OXSM, CAD, PLA2G4A, ELOVL7, THNSL2, CYP27A1, ACOX2, MTHFD1, MTHFD2, BCAT1, IDO1, GNE, PRKAA2, ACSS2, SHMT2, PTGS2, HSD17B10, ACACA, SRR, MTHFD1L, DECR2, CBR4, GSTM4, GOT1, PNPLA8, PYCR1, ASNS, MCAT, ASS1, PER2, AMACR, DHRS9, PSAT1, ADI1, CTH, UST, ALDH18A1, GSTM7	1509	283	20369	2.43256	6.27392e-05	1.20656e-06	1.14325e-06
GOTERM_BP_FAT	GO:0045935~positive regulation of nucleobase-containing compound metabolic process	Positive Regulation Of Nucleobase-Containing Compound Metabolic Process	223	13.258	7.917e-09	HDAC10, MAML2, RBPJ, IKZF2, ZMIZ1, AKT2, ZXDC, FBXO4, HOXA2, KAT8, KAT7, SOX9, CCN1, ACVR1, ACTN1, HMGA1B, SOX12, RUNX2, EREG, RUNX1, ISL2, HOXB9, DDIT3, KCTD13, ZFPM2, ATF5, ZFPM1, ATF6, ATF4, PRDM15, PIK3R2, GATA3, PRDM10, FXR2, TERT, ALX1, ZBTB7B, PPARGC1B, ZBTB7C, STAT5A, EGR1, JAG1, XRCC5, FZD7, SS18L1, NR1D1, SMARCA1, ELL2, TADA2B, MLLT11, AGO3, AGO2, CREBRF, MMS19, CPEB3, EZH1, DCP1B, RARG…	1509	2084	20369	1.4444	6.89468e-05	1.30093e-06	1.23266e-06
GOTERM_BP_FAT	GO:0044087~regulation of cellular component biogenesis	Regulation Of Cellular Component Biogenesis	137	8.14507	8.73323e-09	RAB3A, ICE1, AVIL, EHMT2, RPS6-PS4, GBA2, ACTG1, DOCK11, LGALS3, DPYSL3, CAPN1, SOX9, CCN1, LMO4, WNT5A, SPICE1, PRKCA, TICAM1, EML2, FEZ1, CHMP4C, NUPR1, EZR, FKBP4, VCL, EPHA2, NUMBL, MTMR3, MYCBP2, NEDD4L, PIK3R2, IQGAP1, PLD1, C9ORF72, RAP1GAP, CAMSAP1, MTM1, EFNB1, BAG4, FLRT3, FLRT1, VPS11, EIF4EBP1, MARK4, ATG7, CARMIL1, CARMIL2, LRRN3, IQSEC2, BDNF, TGFB3, XRCC5, CAV1, RCC2, RAB3IP, OSBPL…	1509	1131	20369	1.63508	7.60548e-05	1.40848e-06	1.33457e-06
GOTERM_BP_FAT	GO:0044248~cellular catabolic process	Cellular Catabolic Process	52	3.09156	9.63665e-09	MTRR, HIBADH, CYP4F40, ALDH1L2, SGSH, CYP26B1, NAGLU, CPT2, HYAL1, ANPEP, SESN2, DBT, CAPN1, DLAT, CHAC1, MLYCD, HIBCH, GPT2, DCXR, MCCC1, SORD, THNSL2, ASRGL1, ALDH5A1, ACOX2, KIF16B, ACOT2, BCAT1, IDO1, IDUA, NEDD4L, HSD17B10, ZNRF3, HACL1, DECR2, PCK2, CPA4, GOT1, LNPEP, FAH, CYP4F13, ALDH4A1, ALDH6A1, NUDT8, NAGK, KYAT3, SARDH, ECHDC2, KYAT1, SCLY, LPIN1, LPIN2	1509	294	20369	2.38746	8.3922e-05	1.52592e-06	1.44585e-06
GOTERM_BP_FAT	GO:0048858~cell projection morphogenesis	Cell Projection Morphogenesis	83	4.9346	1.00906e-08	SEMA5A, PRDM8, CNTNAP1, RAB3A, DOCK7, PTPRJ, VLDLR, ACTG1, GOLGA2, SYNGAP1, BCL7A, TCTN1, FLOT1, CPNE1, HOXA2, NRCAM, DIP2A, EMB, SPG11, NEO1, EPHA4, CDKL3, DST, LMO4, UNC5B, WNT5A, PRMT3, VPS13A, LMTK2, PRKCA, NGF, ENAH, ISL2, ZEB2, MAP1A, TNIK, VCL, NUMBL, NYAP1, LRP1, SEMA3C, LAMA1, ARHGEF28, SDC2, SRF, NPR2, MYCBP2, NTN4, IQGAP1, PRICKLE1, GATA3, KALRN, C9ORF72, EGFR, EFNB1, ATXN2, FLRT3, FLR…	1509	580	20369	1.93166	8.78748e-05	1.56926e-06	1.48692e-06
GOTERM_BP_FAT	GO:0065009~regulation of molecular function	Regulation Of Molecular Function	195	11.5933	1.0601e-08	MTRR, AHCYL1, SERPINE2, CBLB, GOLGA2, AKT2, CPNE1, MMUT, CCN1, TSPYL2, EPHA4, DAPK1, PAQR3, ANK2, PRKCA, HCFC2, GTPBP4, EREG, DDIT3, TRIB3, PLPP3, ZFPM1, NGEF, EPHA2, NPRL2, NEDD4L, GATA3, IQGAP1, SLC5A3, KALRN, C9ORF72, PIK3R5, PRDX3, TERT, RAB11FIP2, PPARGC1B, ZBTB7C, WDR59, XRCC5, GADD45A, RCC2, INCA1, EIF2AK4, STFA2, SLC6A9, UNC119, GSTM7, DENND1B, ZFAS1, IL24, SNX13, PTPRJ, VLDLR, PRSS22, SH…	1509	1772	20369	1.48543	9.23197e-05	1.61972e-06	1.53473e-06
GOTERM_BP_FAT	GO:0051896~regulation of phosphatidylinositol 3-kinase/protein kinase B signal transduction	Regulation Of Phosphatidylinositol 3-Kinase/Protein Kinase B Signal Transduction	54	3.21046	1.16811e-08	SEMA5A, SERPINE2, IRS2, PTPRJ, CX3CL1, C1QBP, SESN2, CPNE1, PDGFRB, PDGFRA, UNC5B, MAGI2, MMP3, PRKCA, NRG1, HMGA1B, NGF, VAV2, CEACAM1, HAX1, DDIT3, ADAM8, STAMBP, RAPGEF3, DDR2, HBEGF, PHLPP1, NLRC3, GATA3, CBL, THBS1, EGFR, PIK3R5, MTM1, BAG4, INPP5F, THEM4, PTK2B, SH2B3, OSBPL8, PLK3, TGFB2, EGF, GDF15, MERTK, PTPN13, KLF4, VEGFA, CXCL12, CASS4, SPRY2, PTPN6, OTUD3, FGFR1	1509	313	20369	2.32879	0.000101725	1.75397e-06	1.66193e-06
GOTERM_BP_FAT	GO:0030334~regulation of cell migration	Regulation Of Cell Migration	130	7.72889	1.44205e-08	SEMA5A, ATP8A1, ITGA2B, IRS2, ACTG1, LGALS3, AKT2, DPYSL3, CAPN1, SOX9, CCN1, ARPIN, PDGFRB, ACVR1, EPHA4, PDGFRA, LMO4, IL1R1, SERPINF1, SPNS2, MAGI2, WNT5A, PRKCA, MITF, GTPBP4, PLAA, ADAM8, PLPP3, VCL, EPHA2, NDRG4, STK39, PIK3R2, GATA3, IQGAP1, PLD1, FUT1, FAM83H, CNN2, BAG4, TERT, PLXNA1, SRGAP1, PLXNA4, STAT5A, EGR1, CARMIL1, OSBPL8, TGFB2, STARD13, CARMIL2, JAG1, GADD45A, CAV1, RCC2, MCC, …	1509	1065	20369	1.64769	0.00012558	2.12861e-06	2.01691e-06
GOTERM_BP_FAT	GO:0042254~ribosome biogenesis	Ribosome Biogenesis	56	3.32937	1.52343e-08	RPS6-PS4, MPV17L, PPAN, NOC2L, TFB1M, IPO4, RRP8, RPL7, RPS4X, RPL7A, RPS17, NOB1, C1QBP, METTL15, UTP14A, EIF2A, RPS12, WDR36, DIS3, NSUN3, MRPS2, DDX54, GTPBP4, RPUSD4, RPUSD2, DDX27, HEATR1, NOP2, DDX21, SDAD1, RPF2, TMA16, NOL6, DHX30, RPS15A, EXOSC10, YBEY, UTP20, MDN1, NOP14, NPM1, XRCC5, EFL1, RPP40, WDR12, NPM3, MCAT, WDR55, RCL1, RPS25, GNL3L, MYBBP1A, ZFP593, ESF1, DHX29, RPS24	1509	333	20369	2.26999	0.000132666	2.21125e-06	2.09522e-06
GOTERM_BP_FAT	GO:0120036~plasma membrane bounded cell projection organization	Plasma Membrane Bounded Cell Projection Organization	153	9.09631	1.57158e-08	PRDM8, SEMA5A, CEP126, RAB3A, AVIL, IFT172, INPPL1, CDC14B, ACTG1, GOLGA2, SYNGAP1, TBC1D31, CCDC96, CPNE1, HOXA2, NRCAM, DIP2A, KIFAP3, DYNC2H1, PDGFRB, EPHA4, CDKL3, LMO4, UNC5B, WNT5A, LMTK2, DNAAF5, PRKCA, UBE4B, TMEM80, ISL2, MAP1A, TNIK, BBOF1, EZR, VCL, ROPN1, NUMBL, NYAP1, ARHGEF28, SDC2, NPR2, MYCBP2, NEDD4L, GATA3, IQGAP1, KALRN, C9ORF72, CAMSAP1, EFNB1, ATXN2, BAG4, FLRT3, STK36, TTC21…	1509	1315	20369	1.57053	0.000136859	2.24375e-06	2.12601e-06
GOTERM_BP_FAT	GO:0031344~regulation of cell projection organization	Regulation Of Cell Projection Organization	105	6.24257	1.6839e-08	RPL4, SEMA5A, SERPINE2, AVIL, DIXDC1, INPPL1, GOLGA2, DOCK11, SYNGAP1, DPYSL3, NRCAM, DIP2B, ARPIN, EPHA4, CDKL3, SERPINF1, GLCE, PAQR3, MAGI2, WNT5A, ISLR2, TANC2, TIAM2, FEZ1, HECW2, TNIK, EZR, FKBP4, NGEF, EPHA2, NUMBL, NDRG4, SDC2, MYCBP2, NEDD4L, GATA3, IQGAP1, PLD1, KALRN, RAP1GAP, DGUOK, INPP5F, DVL2, MAP6, DVL3, KIF3C, MARK4, RAP1GAP2, CARMIL1, CARMIL2, BDNF, TGFB3, FBXO38, SS18L1, CAV1, …	1509	807	20369	1.75629	0.00014664	2.33652e-06	2.21391e-06
GOTERM_BP_FAT	GO:0006793~phosphorus metabolic process	Phosphorus Metabolic Process	178	10.5826	1.70301e-08	DGKE, DGKD, INPPL1, RORA, NADSYN1, ALDH1L2, LCLAT1, PLB1, CDC14B, GNPTAB, AKT2, RPS6KA2, NUDT18, PIM3, NEK2, DIP2A, MLYCD, SLC25A42, MMUT, MAP3K9, SOX9, MAP3K5, NUDT12, EIF2A, PDGFRB, EPHA4, PDGFRA, MORC3, ACSL1, DAPK1, OXSM, PAQR3, WNT5A, TTC7B, LMTK2, PRKCA, ATP1B1, THNSL2, PLPP6, ADCY9, MTHFD1, SHPK, GPD2, SIK3, ACOT2, TBPL1, TNIK, SIK2, LETMD1, PLPP3, EPHA2, IDO1, GNE, PFKFB1, MTMR3, TNKS, NP…	1509	1591	20369	1.51019	0.000148304	2.33652e-06	2.21391e-06
GOTERM_BP_FAT	GO:0035239~tube morphogenesis	Tube Morphogenesis	104	6.18312	1.71704e-08	SEMA5A, IFT172, ITGA2B, RORA, RBPJ, ACTG1, NAGLU, ZMIZ1, ANPEP, NRCAM, THSD7A, SOX9, CCN1, PDGFRB, ACVR1, EPHA4, PDGFRA, LMO4, UNC5B, WNT5A, PRKCA, EREG, MTHFD1, ADAM8, ZFPM2, EPHA2, NOTCH2, NPR2, NPRL3, SLC1A1, NPR3, TGFA, GATA3, DVL2, ALX1, TGFB2, STARD13, TFAP2C, JAG1, PTCH1, CAV1, SMARCA1, ESR1, BMP4, CXCL12, GDNF, MKS1, FGFR1, KDM5B, RARG, TNFAIP2, PTPRJ, SHB, CX3CL1, SUFU, TCTN1, IFT57, HTA…	1509	797	20369	1.76139	0.000149526	2.33652e-06	2.21391e-06
GOTERM_BP_FAT	GO:0051641~cellular localization	Cellular Localization	290	17.2414	1.98648e-08	AHCYL1, ZFYVE9, IFT172, GOLGA2, SYNGAP1, GNAT2, AKT2, KIF21B, SOX9, KIFAP3, VPS39, SCN1A, DYNC2H1, TANGO6, COG5, PAQR3, ANK2, HMGA1B, ANK1, SYTL2, ZFYVE16, RUFY4, PARD3, DDIT3, MAP1A, EZR, ROPN1, EPHA2, TMEM87B, LMAN2L, MTTP, AGAP1, NEDD4L, PIK3R2, KALRN, C9ORF72, TERT, SCFD2, BLOC1S3, VPS11, MAP6, RAB11FIP2, ATG7, B4GALNT2, CARMIL2, WDR59, XRCC5, RCC2, SYNRG, LRBA, RAB3IP, RAB39B, STAM, SLC6A9, …	1509	2891	20369	1.35404	0.000172988	2.66158e-06	2.52191e-06
GOTERM_BP_FAT	GO:0031175~neuron projection development	Neuron Projection Development	107	6.36147	2.10509e-08	PRDM8, SEMA5A, RAB3A, ACTG1, GOLGA2, SYNGAP1, CPNE1, HOXA2, NRCAM, DIP2A, EPHA4, CDKL3, LMO4, UNC5B, WNT5A, LMTK2, PRKCA, UBE4B, ISL2, MAP1A, TNIK, VCL, NUMBL, NYAP1, ARHGEF28, SDC2, NPR2, MYCBP2, NEDD4L, GATA3, IQGAP1, KALRN, C9ORF72, CAMSAP1, EFNB1, ATXN2, FLRT3, FLRT1, BLOC1S3, MAP6, PLXNA1, PIP5K1C, NPTX1, ATG7, PLXNA4, TGFB2, BDNF, PTCH1, SS18L1, EIF2AK4, AFDN, CXCL12, GDNF, DLG4, MKS1, SPIR…	1509	831	20369	1.73805	0.000183316	2.77777e-06	2.63201e-06
GOTERM_BP_FAT	GO:0072359~circulatory system development	Circulatory System Development	132	7.8478	2.25637e-08	SEMA5A, IFT172, ITGA2B, RORA, RBPJ, FGFRL1, ACTG1, NAGLU, ZMIZ1, RPS6KA2, ANPEP, NRCAM, THSD7A, SOX9, CCN1, DYNC2H1, PDGFRB, ACVR1, PDGFRA, CXADR, LMO4, UNC5B, WNT5A, PRKCA, ANK2, FRS2, UBE4B, HMGA1B, EREG, ADAM19, MTHFD1, DDIT3, HHIPL1, ANKS6, ADAM8, PLPP3, ZFPM2, ZFPM1, EPHA2, NOTCH2, NDRG4, NPR2, NPRL3, SLC1A1, NPR3, TGFA, GATA3, LTBP1, GRK2, TERT, FLRT3, ADGRG6, DVL2, DVL3, ATG7, PLXNA4, EGR1…	1509	1095	20369	1.6272	0.000196488	2.93294e-06	2.77904e-06
GOTERM_BP_FAT	GO:0006796~phosphate-containing compound metabolic process	Phosphate-Containing Compound Metabolic Process	177	10.5232	2.30183e-08	DGKE, DGKD, INPPL1, RORA, NADSYN1, ALDH1L2, LCLAT1, PLB1, CDC14B, GNPTAB, AKT2, RPS6KA2, NUDT18, PIM3, NEK2, DIP2A, MLYCD, SLC25A42, MMUT, MAP3K9, SOX9, MAP3K5, NUDT12, EIF2A, PDGFRB, EPHA4, PDGFRA, MORC3, ACSL1, DAPK1, OXSM, PAQR3, WNT5A, TTC7B, LMTK2, PRKCA, ATP1B1, THNSL2, PLPP6, ADCY9, MTHFD1, SHPK, GPD2, SIK3, ACOT2, TBPL1, TNIK, SIK2, LETMD1, PLPP3, EPHA2, IDO1, GNE, PFKFB1, MTMR3, TNKS, NP…	1509	1588	20369	1.50454	0.000200447	2.94804e-06	2.79334e-06
GOTERM_BP_FAT	GO:0071363~cellular response to growth factor stimulus	Cellular Response To Growth Factor Stimulus	82	4.87515	3.19629e-08	KDM5B, ITGB5, ZFYVE9, PTPRK, FGFRL1, ZFP36, EEF2K, ZMIZ1, HYAL1, ANKRD1, SOX9, GIT1, PDGFRB, ACVR1, EPHA4, PDGFRA, FGFBP1, FST, WNT5A, CAD, MAGI2, LMTK2, FRS2, NGF, FRS3, RUNX2, RGMA, RUNX1, TGFBR3, KIF16B, FEZ1, PPARG, SOS1, MET, CD44, EPHA2, DDR2, NOTCH2, FOXC1, HTRA2, IQGAP1, GATA3, ADAMTS12, CBL, LTBP1, THBS1, RAP1GAP, ZFP36L2, EGFR, FAM83G, BAG4, GRK2, CHST11, FLRT3, MICALL1, FLRT1, RPS3, HA…	1509	585	20369	1.89208	0.000278326	4.03427e-06	3.82257e-06
GOTERM_BP_FAT	GO:0048729~tissue morphogenesis	Tissue Morphogenesis	92	5.46968	3.29427e-08	SEMA5A, KDM5B, RARG, ITGB5, ITGB4, TGFB1I1, IFT172, RBPJ, ACTG1, NAGLU, SUFU, TCTN1, ANKRD1, SOX9, CCN1, IFT57, KDM6B, ACVR1, EPHA4, LMO4, NCOA3, FST, MMP2, WNT5A, FRS2, UBE4B, NRG1, RGMA, RUNX1, TGFBR3, ENAH, ZEB2, CEACAM1, MTHFD1, PARD3, EXOC4, ADAM8, SOS1, ZFPM2, MET, ZFPM1, VCL, CD44, EPHA2, HBEGF, NOTCH2, FOXC1, SEMA3C, LAMA1, SRF, CCDC103, GCNT1, TULP3, PRICKLE1, GATA3, DLL1, EGFR, MTHFD1L,…	1509	685	20369	1.81292	0.000286857	4.09855e-06	3.88348e-06
GOTERM_BP_FAT	GO:0010975~regulation of neuron projection development	Regulation Of Neuron Projection Development	82	4.87515	3.41862e-08	SEMA5A, RPL4, SERPINE2, AVIL, DIXDC1, INPPL1, VLDLR, CX3CL1, PTPRG, GOLGA2, SYNGAP1, EEF2K, NCS1, DPYSL3, ENC1, ANKRD1, NRCAM, DIP2B, NEO1, EPHA4, CDKL3, CAMK1D, SERPINF1, WNT5A, PAQR3, MAGI2, ISLR2, NRG1, NGF, TANC2, RGMA, GAK, TIAM2, ZEB2, FEZ1, HECW2, TNIK, FKBP4, MET, NGEF, DDR2, NUMBL, NDRG4, LRP1, SDC2, SRF, MYCBP2, NEDD4L, IQGAP1, GATA3, KALRN, DGUOK, INPP5F, TRIM46, PTK2B, MAP6, MFN2, LRI…	1509	586	20369	1.88885	0.000297683	4.19335e-06	3.9733e-06
GOTERM_BP_FAT	GO:0070848~response to growth factor	Response To Growth Factor	85	5.05351	4.0651e-08	KDM5B, ITGB5, ZFYVE9, PTPRK, FGFRL1, ZFP36, EEF2K, ZMIZ1, HYAL1, ANKRD1, SOX9, GIT1, PDGFRB, ACVR1, EPHA4, PDGFRA, FGFBP1, ANXA3, FST, WNT5A, CAD, MAGI2, LMTK2, FRS2, NGF, FRS3, RUNX2, RGMA, RUNX1, TGFBR3, KIF16B, DDIT3, FEZ1, PPARG, SOS1, MET, CD44, EPHA2, DDR2, NOTCH2, FOXC1, NPR2, HTRA2, IQGAP1, GATA3, ADAMTS12, CBL, LTBP1, THBS1, RAP1GAP, ZFP36L2, EGFR, FAM83G, BAG4, GRK2, CHST11, FLRT3, MICA…	1509	618	20369	1.85657	0.000353967	4.91708e-06	4.65906e-06
GOTERM_BP_FAT	GO:0022613~ribonucleoprotein complex biogenesis	Ribonucleoprotein Complex Biogenesis	69	4.10226	4.57609e-08	RPS6-PS4, MPV17L, PPAN, NOC2L, TFB1M, IPO4, RRP8, RPL7, RPS4X, RPL7A, RPS17, NOB1, C1QBP, METTL15, UTP14A, EIF2A, RPS12, WDR36, PRMT7, DIS3, NSUN3, MRPS2, DDX54, GTPBP4, RPUSD4, RPUSD2, GEMIN5, DDX27, HEATR1, NOP2, DDX21, SDAD1, RPF2, PRPF8, TMA16, NOL6, DHX30, RPS15A, EXOSC10, YBEY, UTP20, MDN1, EIF4B, NOP14, NPM1, XRCC5, EFL1, RPP40, EIF2S2, WDR12, NPM3, MCAT, WDR55, RCL1, RPS25, XAB2, GNL3L, M…	1509	464	20369	2.0073	0.000398452	5.45933e-06	5.17286e-06
GOTERM_BP_FAT	GO:0008104~protein localization	Protein Localization	221	13.1391	4.98893e-08	AHCYL1, GOLGA2, SYNGAP1, GNAT2, AKT2, SOX9, KIFAP3, VPS39, DYNC2H1, TANGO6, COG5, PAQR3, ANK2, HMGA1B, ANK1, SYTL2, ZFYVE16, PARD3, DDIT3, MAP1A, EZR, ROPN1, EPHA2, LMAN2L, MTTP, AGAP1, PIK3R2, KALRN, TERT, SCFD2, BLOC1S3, VPS11, RAB11FIP2, ATG7, B4GALNT2, CARMIL2, WDR59, XRCC5, RCC2, SYNRG, LRBA, RAB3IP, RAB39B, STAM, UNC119, MON1A, DCP1B, INVS, DENND1B, LRSAM1, SNX13, MIA2, DOC2B, PTPRK, VLDLR,…	1509	2107	20369	1.41582	0.000434392	5.87144e-06	5.56334e-06
GOTERM_BP_FAT	GO:0070727~cellular macromolecule localization	Cellular Macromolecule Localization	221	13.1391	6.51373e-08	AHCYL1, GOLGA2, SYNGAP1, GNAT2, AKT2, SOX9, KIFAP3, VPS39, DYNC2H1, TANGO6, COG5, PAQR3, ANK2, HMGA1B, ANK1, SYTL2, ZFYVE16, PARD3, DDIT3, MAP1A, EZR, ROPN1, EPHA2, LMAN2L, MTTP, AGAP1, PIK3R2, KALRN, TERT, SCFD2, BLOC1S3, VPS11, RAB11FIP2, ATG7, B4GALNT2, CARMIL2, WDR59, XRCC5, RCC2, SYNRG, LRBA, RAB3IP, RAB39B, STAM, UNC119, MON1A, DCP1B, INVS, DENND1B, LRSAM1, SNX13, MIA2, DOC2B, PTPRK, VLDLR,…	1509	2115	20369	1.41047	0.00056712	7.56374e-06	7.16684e-06
GOTERM_BP_FAT	GO:0002009~morphogenesis of an epithelium	Morphogenesis Of An Epithelium	78	4.63734	6.85859e-08	SEMA5A, KDM5B, RARG, ITGB5, TGFB1I1, IFT172, RBPJ, ACTG1, NAGLU, SUFU, TCTN1, SOX9, CCN1, IFT57, ACVR1, EPHA4, LMO4, NCOA3, FST, MMP2, WNT5A, FRS2, RGMA, RUNX1, ENAH, ZEB2, CEACAM1, MTHFD1, PARD3, SOS1, MET, VCL, CD44, EPHA2, HBEGF, NOTCH2, SEMA3C, LAMA1, SRF, CCDC103, TULP3, PRICKLE1, GATA3, DLL1, EGFR, MTHFD1L, FLRT3, DVL2, PLXNA1, ALX1, STAT5A, STARD13, TFAP2C, TGFB2, CARMIL2, MAP3K1, JAG1, EG…	1509	556	20369	1.89365	0.000597136	7.8594e-06	7.44698e-06
GOTERM_BP_FAT	GO:0008285~negative regulation of cell population proliferation	Negative Regulation Of Cell Population Proliferation	99	5.88585	7.13394e-08	SERPINE2, IFT172, WWC1, WWC2, INPPL1, CBLB, TMEM131L, IFI30, RBPJ, FGFRL1, LGALS3, RASSF5, RPS6KA2, FBXO4, SOX9, KIFAP3, MORC3, CXADR, SERPINF1, MAGI2, WNT5A, P3H2, PRKCA, HMGA1B, GTPBP4, EREG, RUNX1, NUPR1, ATF5, IDO1, NDRG4, NPR3, GATA3, RAP1GAP, TERT, NACC2, ZBTB7B, ZBTB7C, TGFB2, BDNF, TGFB3, PTCH1, CAV1, INCA1, TRPV2, INHBA, MCC, ESR1, BMP4, H19, CXCL12, BCL6, SNAI2, RARG, ZFAS1, IL24, CHD5,…	1509	768	20369	1.74002	0.000621102	8.06876e-06	7.64536e-06
GOTERM_BP_FAT	GO:0009725~response to hormone	Response To Hormone	121	7.19382	7.39241e-08	AHCYL1, RPS6-PS4, INPPL1, IRS2, MSI1, NR3C2, ZFP36, ZMIZ1, AKT2, SESN2, LONP1, CAPN1, PDK2, PDGFRB, EPHA4, ARSA, PDGFRA, ACSL1, SERPINF1, HMGA1B, EREG, TRIB3, SIK2, FKBP4, EPHA2, PFKFB1, DHH, NPR2, STK39, PIK3R2, GATA3, IQGAP1, PLD1, ZFP36L2, ACACA, SOCS2, STC2, UBR5, EIF4EBP1, SMYD3, ZBTB7B, SOCS7, PPARGC1B, PCK2, STAT5A, EGR1, EIF2B3, TGFB2, GOT1, TGFB3, CAV1, ASNS, LNPEP, NR1D1, INHBA, ESR1, B…	1509	999	20369	1.63493	0.000643598	8.25391e-06	7.82079e-06
GOTERM_BP_FAT	GO:2000145~regulation of cell motility	Regulation Of Cell Motility	133	7.90725	7.86078e-08	SEMA5A, ATP8A1, ITGA2B, IRS2, ACTG1, LGALS3, AKT2, DPYSL3, CAPN1, SOX9, CCN1, ARPIN, PDGFRB, ACVR1, EPHA4, PDGFRA, LMO4, IL1R1, SERPINF1, SPNS2, MAGI2, WNT5A, PRKCA, MITF, GTPBP4, PLAA, ADAM8, PLPP3, VCL, EPHA2, NDRG4, STK39, PIK3R2, GATA3, IQGAP1, PLD1, FUT1, FAM83H, CNN2, BAG4, INPP5F, TERT, PLXNA1, SRGAP1, PLXNA4, STAT5A, EGR1, CARMIL1, OSBPL8, TGFB2, STARD13, CARMIL2, JAG1, GADD45A, CAV1, RCC…	1509	1129	20369	1.59015	0.000684361	8.66576e-06	8.21103e-06
GOTERM_BP_FAT	GO:0120035~regulation of plasma membrane bounded cell projection organization	Regulation Of Plasma Membrane Bounded Cell Projection Organization	101	6.00476	8.28576e-08	RPL4, SEMA5A, SERPINE2, AVIL, DIXDC1, INPPL1, GOLGA2, DOCK11, SYNGAP1, DPYSL3, NRCAM, DIP2B, ARPIN, EPHA4, CDKL3, SERPINF1, PAQR3, MAGI2, WNT5A, ISLR2, TANC2, TIAM2, FEZ1, HECW2, TNIK, EZR, FKBP4, NGEF, EPHA2, NUMBL, NDRG4, SDC2, MYCBP2, NEDD4L, GATA3, IQGAP1, PLD1, KALRN, RAP1GAP, DGUOK, INPP5F, MAP6, KIF3C, MARK4, RAP1GAP2, CARMIL1, CARMIL2, BDNF, TGFB3, FBXO38, SS18L1, CAV1, RCC2, RAB3IP, TRPV…	1509	791	20369	1.72356	0.000721347	8.9478e-06	8.47827e-06
GOTERM_BP_FAT	GO:0030030~cell projection organization	Cell Projection Organization	155	9.21522	8.3221e-08	PRDM8, SEMA5A, CEP126, RAB3A, AVIL, IFT172, INPPL1, CDC14B, ACTG1, GOLGA2, SYNGAP1, TBC1D31, CCDC96, CPNE1, HOXA2, NRCAM, DIP2A, KIFAP3, DYNC2H1, PDGFRB, EPHA4, CDKL3, LMO4, UNC5B, WNT5A, LMTK2, DNAAF5, PRKCA, UBE4B, TMEM80, ISL2, MAP1A, TNIK, BBOF1, EZR, VCL, ROPN1, NUMBL, NYAP1, ARHGEF28, SDC2, NPR2, MYCBP2, NEDD4L, GATA3, IQGAP1, KALRN, C9ORF72, CAMSAP1, EFNB1, ATXN2, BAG4, FLRT3, STK36, TTC21…	1509	1371	20369	1.52607	0.000724509	8.9478e-06	8.47827e-06
GOTERM_BP_FAT	GO:0006520~amino acid metabolic process	Amino Acid Metabolic Process	48	2.85375	9.11634e-08	MTRR, AARS2, HIBADH, SHMT2, AASDH, ASNSD1, MTR, HSD17B10, PFAS, FARS2, SRR, DGLUCY, DBT, PHGDH, MMUT, PSPH, HIBCH, EARS2, GOT1, GPT2, CAD, MCCC1, PYCR1, DARS2, ASNS, FAH, THNSL2, ASRGL1, ASS1, ALDH4A1, ALDH6A1, ALDH5A1, MTHFD1, PSAT1, ADI1, CTH, KYAT3, SARDH, KYAT1, SCLY, ALDH18A1, BCAT1, CARS2, NIT2, GART, FARSB, ATF4, IDO1	1509	279	20369	2.3223	0.000793627	9.68222e-06	9.17415e-06
GOTERM_BP_FAT	GO:0048666~neuron development	Neuron Development	123	7.31272	9.40787e-08	PRDM8, SEMA5A, RAB3A, GBA2, ACTG1, GOLGA2, SYNGAP1, NAGLU, GNAT2, ZMIZ1, DPYSL3, CPNE1, HOXA2, NRCAM, DIP2A, EPHA4, CDKL3, LMO4, UNC5B, WNT5A, LMTK2, PRKCA, UBE4B, RUNX1, ISL2, MAP1A, TNIK, ATF5, ALG10B, VCL, NUMBL, NYAP1, ARHGEF28, SDC2, NPR2, MYCBP2, NEDD4L, HTRA2, GATA3, IQGAP1, KALRN, C9ORF72, CAMSAP1, EFNB1, ATXN2, FLRT3, FLRT1, BLOC1S3, MAP6, PLXNA1, PIP5K1C, NPTX1, ATG7, PLXNA4, ZBTB18, TG…	1509	1025	20369	1.6198	0.000818996	9.87146e-06	9.35346e-06
GOTERM_BP_FAT	GO:1901605~alpha-amino acid metabolic process	Alpha-Amino Acid Metabolic Process	39	2.31867	9.57465e-08	MTRR, HIBADH, SHMT2, ASNSD1, MTR, HSD17B10, PFAS, SRR, DGLUCY, PHGDH, MMUT, PSPH, HIBCH, GOT1, GPT2, CAD, MCCC1, PYCR1, ASNS, FAH, THNSL2, ASRGL1, ASS1, ALDH4A1, ALDH6A1, ALDH5A1, MTHFD1, PSAT1, ADI1, CTH, KYAT3, SARDH, KYAT1, SCLY, ALDH18A1, NIT2, GART, ATF4, IDO1	1509	203	20369	2.59328	0.000833509	9.92686e-06	9.40595e-06
GOTERM_BP_FAT	GO:0007169~cell surface receptor protein tyrosine kinase signaling pathway	Cell Surface Receptor Protein Tyrosine Kinase Signaling Pathway	64	3.80499	1.02006e-07	BCAR3, IRS2, PTPRJ, FGFRL1, AKT2, SOX9, GIT1, PDK2, PDGFRB, EPHA4, PDGFRA, FGFBP1, WNT5A, VPS13A, LMTK2, FRS2, NRG1, HMGA1B, GAB2, NGF, SLC39A14, FRS3, EREG, TOM1L1, KIF16B, COL4A5, SIK2, SOS1, MET, SOS2, NGEF, EPHA2, DDR2, HBEGF, FOXC1, NPR2, TGFA, PIK3R2, IQGAP1, PRICKLE1, EGFR, SOCS2, EFNB1, ERBB3, FLRT3, FLRT1, EIF4EBP1, PTK2B, SOCS7, CLASP2, STAT5A, BDNF, SORT1, EGF, GDF15, MERTK, VEGFA, SUL…	1509	426	20369	2.02792	0.000887979	1.04514e-05	9.90301e-06
GOTERM_BP_FAT	GO:0051094~positive regulation of developmental process	Positive Regulation Of Developmental Process	174	10.3448	1.08953e-07	RPL4, SEMA5A, SH3GL3, SERPINE2, DIXDC1, RBPJ, IPO7, ACTG1, GOLGA2, RIMS2, LGALS3, ZFP36, CCND2, ZMIZ1, CPNE1, KAT8, KAT7, SOX9, CCN1, MAP3K5, ACVR1, EPHA4, CDKL3, PDGFRA, SERPINF1, FST, WNT5A, ISLR2, PRKCA, FRS2, SOX12, RUNX2, RUNX1, TIAM2, PLAA, ADAM8, TNIK, WDFY2, EZR, ZFPM2, ATF4, NOTCH2, NUMBL, NEDD4L, CREBL2, GATA3, IQGAP1, FUT1, KALRN, MTM1, SOCS2, FXR2, TERT, FLRT3, FLRT1, DVL2, MAP6, DVL3…	1509	1589	20369	1.47811	0.000948422	1.10334e-05	1.04544e-05
GOTERM_BP_FAT	GO:0030155~regulation of cell adhesion	Regulation Of Cell Adhesion	106	6.30202	1.18886e-07	SEMA5A, SERPINE2, CBLB, TMEM131L, RBPJ, ACTG1, LGALS3, ZMIZ1, CAPN1, SOX9, CCN1, KIFAP3, EPHA4, ST6GAL1, MAGI2, WNT5A, PRKCA, SOX12, GTPBP4, RUNX1, ADAM19, ADAM8, PLPP3, VCL, EPHA2, IDO1, AKNA, PIK3R2, GATA3, IQGAP1, FUT1, FBLN2, RAP1GAP, EFNB1, BAG4, ZBTB7B, B4GALNT2, STAT5A, CARMIL1, TGFB2, CARMIL2, JAG1, CDSN, PHF10, FBXO38, FZD7, CAV1, RCC2, BMP6, LRFN3, BMP4, AFDN, CXCL12, BCL6, CASS4, SNAI2…	1509	849	20369	1.68531	0.00103484	1.19009e-05	1.12764e-05
GOTERM_BP_FAT	GO:0033043~regulation of organelle organization	Regulation Of Organelle Organization	143	8.50178	1.21279e-07	SEMA5A, RAB3A, PRDM9, AVIL, EHMT2, MPV17L, DIXDC1, INPPL1, GHITM, GBA2, ACTG1, RIMS2, RPS6KA2, FBXO4, TOM1, NEK2, CAPN1, TMEM14A, ARPIN, WASHC2, PDGFRB, FBXW5, WNT5A, SPICE1, ANK1, EML2, EREG, TOM1L1, FEZ1, HECW2, MAP1A, CHMP4C, TBC1D25, BBOF1, NUPR1, EZR, FKBP4, ANAPC1, NGEF, CUL9, MTMR3, TNKS, NPR2, MYCBP2, TGFA, PIK3R2, OMA1, C9ORF72, CAMSAP1, MTM1, EFNB1, BAG4, VPS11, MAP6, MARK4, CARMIL1, TG…	1509	1247	20369	1.54793	0.00105566	1.20025e-05	1.13726e-05
GOTERM_BP_FAT	GO:0043412~macromolecule modification	Macromolecule Modification	217	12.9013	1.37433e-07	HDAC10, EHMT2, CBLB, GOLGA2, KRTCAP2, ZMIZ1, RPS6KA2, OGFOD1, AKT2, FBXO4, KAT7, SOX9, DUS4L, USP17LC, EIF2A, EPHA4, ST6GAL1, NHLRC3, DAPK1, PAQR3, P3H2, MOGS, PRKCA, RNF123, PLPP6, HECW2, SIK3, TTLL13, KCTD13, SIK2, ALG10B, MTMR3, SHMT2, MYCBP2, MTTP, NEDD4L, COPS7A, PRDX3, DGUOK, VPS11, ATG7, B4GALNT2, STAT5A, PMM1, EIF2AK4, STFA2, NCEH1, CDC16, PPT2, DZIP3, INVS, DET1, LRSAM1, AATK, PTPRJ, PTP…	1509	2088	20369	1.40285	0.00119619	1.34484e-05	1.27427e-05
GOTERM_BP_FAT	GO:1902532~negative regulation of intracellular signal transduction	Negative Regulation Of Intracellular Signal Transduction	96	5.70749	1.54189e-07	DGKD, DYRK2, SERPINE2, WWC1, WWC2, RORA, PTPRJ, NOC2L, YBX3, HERPUD1, CYP26B1, SYNGAP1, DEPTOR, AKT2, C1QBP, SMPD1, SESN2, CPNE1, BANF1, CAPN1, GIT1, CGNL1, DUSP4, EPHA4, PAQR3, MAGI2, MMP3, ZDHHC12, TMC8, PRKCA, DUSP9, ATAD3A, DUSP7, TGFBR3, CEACAM1, RRM2B, RASA3, NPC1, DDIT3, RASA2, CRY2, KCTD13, PPARG, STAMBP, EZR, MET, CD44, LYPLAL1, ATF4, PHLPP1, AARS2, PRKAA2, LRP1, NPRL2, NPRL3, PRDM15, PI…	1509	749	20369	1.73009	0.00134193	1.48429e-05	1.40641e-05
GOTERM_BP_FAT	GO:0022603~regulation of anatomical structure morphogenesis	Regulation Of Anatomical Structure Morphogenesis	117	6.956	1.55093e-07	RPL4, SEMA5A, DIXDC1, RBPJ, GOLGA2, RIMS2, LGALS3, SYNGAP1, DIP2B, SOX9, ARPIN, EPHA4, CDKL3, PDGFRA, SERPINF1, WNT5A, ISLR2, PRKCA, FRS2, TANC2, RUNX2, RUNX1, TIAM2, HECW2, PLAA, TNIK, EZR, NGEF, EPHA2, NUMBL, SDC2, NEDD4L, GATA3, OMA1, ADAMTS12, FUT1, KALRN, CAMSAP1, FBLN5, FAM171A1, TERT, DVL2, MAP6, DVL3, TGFB2, STARD13, JAG1, BDNF, GADD45A, SS18L1, TRPV2, PARVB, ESR1, ARHGAP33, BMP4, AFDN, C…	1509	970	20369	1.62815	0.0013498	1.48429e-05	1.40641e-05
GOTERM_BP_FAT	GO:0007409~axonogenesis	Axonogenesis	61	3.62663	1.92289e-07	SEMA5A, PRDM8, CNTNAP1, RAB3A, DOCK7, PTPRJ, ACTG1, GOLGA2, SYNGAP1, TCTN1, FLOT1, HOXA2, NRCAM, EMB, SPG11, NEO1, EPHA4, DST, LMO4, UNC5B, WNT5A, LMTK2, PRKCA, NGF, ENAH, ISL2, ZEB2, MAP1A, VCL, NUMBL, LRP1, SEMA3C, LAMA1, ARHGEF28, SRF, NPR2, MYCBP2, NTN4, PRICKLE1, GATA3, KALRN, C9ORF72, EFNB1, FLRT3, TRIM46, NCAM1, PIP5K1C, NPTX1, ATG7, PLXNA4, TGFB2, BDNF, SEMA4B, PTCH1, WNT7B, SEMA4F, VEGFA…	1509	405	20369	2.03308	0.00167324	1.82026e-05	1.72474e-05
GOTERM_BP_FAT	GO:0048646~anatomical structure formation involved in morphogenesis	Anatomical Structure Formation Involved In Morphogenesis	128	7.60999	2.15821e-07	SEMA5A, IFT172, ITGA2B, RORA, RBPJ, ACTG1, ANPEP, NRCAM, THSD7A, SOX9, CCN1, PDGFRB, ACVR1, PDGFRA, LMO4, UNC5B, ACTN1, WNT5A, PRKCA, ANK2, FRS2, EREG, MTHFD1, KIF16B, TBPL1, ADAM8, TCTA, ZFPM2, ZFPM1, EPHA2, NOTCH2, NPR2, NOP2, SLC1A1, NPR3, TGFA, GATA3, ATXN2, TTC21B, ADGRG6, DVL2, PLXNA1, ALX1, SOCS7, PPARGC1B, TGFB2, TFAP2C, PTCH1, CAV1, INHBA, SMARCA1, BMP4, CXCL12, BCL6, GDNF, MKS1, SNAI2, …	1509	1095	20369	1.57789	0.00187782	2.02106e-05	1.915e-05
GOTERM_BP_FAT	GO:0050790~regulation of catalytic activity	Regulation Of Catalytic Activity	124	7.37218	2.494e-07	MTRR, SERPINE2, CBLB, IRS2, CDC14B, DOCK11, ZFP36, CCND2, DEPTOR, AKT2, SESN2, BANF1, CAPN1, MMUT, CCN1, MAP3K5, TSPYL2, PDGFRB, EPHA4, LMO4, RALGAPA1, PAQR3, WNT5A, PRKCA, GTPBP4, EREG, TOM1L1, BSCL2, OXA1L, PLAA, TRIB3, NGEF, EPHA2, NOTCH2, NPRL2, SLC1A1, IQGAP1, RASGRP2, SLC5A3, KALRN, C9ORF72, RAP1GAP, PIK3R5, PRDX3, BAG4, TERT, DVL2, DVL3, SMYD3, RAB11FIP2, PPARGC1B, TMEM132C, TGFB2, WDR59, …	1509	1054	20369	1.58804	0.00216966	2.31066e-05	2.18941e-05
GOTERM_BP_FAT	GO:0035295~tube development	Tube Development	128	7.60999	2.75947e-07	SEMA5A, RAB3A, SERPINE2, IFT172, ITGA2B, RORA, RBPJ, ACTG1, NAGLU, ZMIZ1, ANPEP, NRCAM, THSD7A, SOX9, CCN1, SCAPER, PDGFRB, ACVR1, EPHA4, PDGFRA, LMO4, UNC5B, WNT5A, PRKCA, HMGA1B, EREG, MTHFD1, ADAM8, ZFPM2, EPHA2, NOTCH2, NPR2, NPRL3, SLC1A1, NPR3, TGFA, GATA3, DVL2, ALX1, PLXNA4, ZFP358, TGFB2, STARD13, TFAP2C, JAG1, BDNF, TGFB3, PTCH1, CAV1, HPS1, SMARCA1, ESR1, BMP4, CXCL12, GDNF, MKS1, ADA,…	1509	1100	20369	1.57072	0.00240034	2.52971e-05	2.39696e-05
GOTERM_BP_FAT	GO:0040012~regulation of locomotion	Regulation Of Locomotion	135	8.02616	2.97615e-07	SEMA5A, ATP8A1, ITGA2B, IRS2, ACTG1, LGALS3, AKT2, DPYSL3, CAPN1, SOX9, CCN1, ARPIN, PDGFRB, ACVR1, EPHA4, PDGFRA, ST6GAL1, LMO4, IL1R1, SERPINF1, SPNS2, MAGI2, WNT5A, PRKCA, MITF, GTPBP4, PLAA, ADAM8, PLPP3, VCL, EPHA2, NDRG4, MYCBP2, STK39, PIK3R2, GATA3, IQGAP1, PLD1, FUT1, FAM83H, CNN2, BAG4, INPP5F, TERT, PLXNA1, SRGAP1, PLXNA4, STAT5A, EGR1, CARMIL1, OSBPL8, TGFB2, STARD13, CARMIL2, JAG1, G…	1509	1178	20369	1.54692	0.00258857	2.69993e-05	2.55825e-05
GOTERM_BP_FAT	GO:0051129~negative regulation of cellular component organization	Negative Regulation Of Cellular Component Organization	98	5.8264	3.03216e-07	SEMA5A, ANKRD13B, SH3GL3, AVIL, EHMT2, RPS6-PS4, MPV17L, INPPL1, GHITM, LGALS3, SYNGAP1, RPS6KA2, DPYSL3, CAPN1, DIP2B, SOX9, TMEM14A, ARPIN, EPHA4, CDKL3, LMO4, GLCE, PAQR3, WNT5A, EML2, TOM1L1, FEZ1, MAP1A, BBOF1, NUPR1, FKBP4, NGEF, TNKS, OMA1, RAP1GAP, CAMSAP1, MTM1, CNN2, DGUOK, ATXN2, INPP5F, EIF4EBP1, ATG7, RAP1GAP2, CARMIL1, CARMIL2, XRCC5, CAV1, RCC2, RAB3IP, FZD9, ESR1, BMP6, SSH1, BMP4…	1509	781	20369	1.69377	0.00263722	2.72238e-05	2.57952e-05
GOTERM_BP_FAT	GO:0043549~regulation of kinase activity	Regulation Of Kinase Activity	71	4.22117	3.29099e-07	IRS2, PTPRJ, VLDLR, SHB, CCND2, DEPTOR, SMPD1, SESN2, CCN1, MAP3K5, PDGFRB, TSPYL2, EPHA4, GPR39, LMO4, WNT5A, PAQR3, PRKCA, NRG1, GTPBP4, EREG, DUSP7, TOM1L1, ZEB2, CEACAM1, PSRC1, GPRC5A, TRAF4, TRIB3, PPARG, TLR6, ARHGEF5, DDR2, MCPH1, NOTCH2, NPRL2, SLC1A1, IQGAP1, WDR24, THBS1, EGFR, PIK3R5, PRDX3, RPS3, DVL2, PTK2B, SMYD3, CDKN2B, TGFB2, NPM1, MAP3K1, WDR59, GADD45A, XRCC5, EGF, CAV1, SPRY4…	1509	508	20369	1.88658	0.00286202	2.90636e-05	2.75385e-05
GOTERM_BP_FAT	GO:0051130~positive regulation of cellular component organization	Positive Regulation Of Cellular Component Organization	148	8.79905	3.30382e-07	RPL4, SEMA5A, DGKD, PRDM9, ATP8A1, ICE1, SERPINE2, AVIL, DIXDC1, GOLGA2, DOCK11, LGALS3, DPYSL3, FBXO4, TOM1, NEK2, SOX9, PDGFRB, EPHA4, CDKL3, SERPINF1, MAGI2, WNT5A, ISLR2, PRKCA, ANK1, EREG, TIAM2, PARD3, FEZ1, TNIK, EPHA2, NUMBL, NDRG4, TNKS, NPR2, TGFA, NEDD4L, IQGAP1, KALRN, RAP1GAP, BAG4, FLRT3, FLRT1, DVL2, MAP6, DVL3, KIF3C, MARK4, CARMIL1, TGFB2, CARMIL2, LRRN3, IQSEC2, BDNF, TGFB3, XRC…	1509	1324	20369	1.50888	0.00287316	2.90636e-05	2.75385e-05

## Sheet: S5. ADC106 David Down
Supplemental Table S5. Gene ontology analysis of enoxacin downregulated genes in ADC106 cells. DAVID gene ontology of downregulated genes in cells treated with enx compared to DMSO with FDR<0.05 and log2 fold change <-0.5 (969 genes).
Category	Term	Clean Term	Count	%	PValue	Genes	List Total	Pop Hits	Pop Total	Fold Enrichment	Bonferroni	Benjamini	FDR
GOTERM_BP_FAT	GO:0030198~extracellular matrix organization	Extracellular Matrix Organization	39	4.14453	1.45963e-10	ZFP469, COL15A1, COL16A1, ECM2, COL13A1, PAPLN, LTBP4, DPT, DMP1, FBLN1, LOXL2, ADAMTSL1, ADAMTS5, ADAMTS2, EFEMP2, ADAMTSL2, SH3PXD2B, MMP28, ADAMTS17, HAS3, SERPINH1, ADAMTS7, TGFB2, LAMB2, FOXF1, MMP2, NPNT, MMP9, GREM1, COL1A1, COL3A1, MMP14, COL5A3, MMP17, COL6A1, VWA1, TGFBI, DDR2, MEGF9	817	291	20369	3.34133	9.83206e-07	4.02933e-07	3.91807e-07
GOTERM_BP_FAT	GO:0045229~external encapsulating structure organization	External Encapsulating Structure Organization	39	4.14453	1.62309e-10	ZFP469, COL15A1, COL16A1, ECM2, COL13A1, PAPLN, LTBP4, DPT, DMP1, FBLN1, LOXL2, ADAMTSL1, ADAMTS5, ADAMTS2, EFEMP2, ADAMTSL2, SH3PXD2B, MMP28, ADAMTS17, HAS3, SERPINH1, ADAMTS7, TGFB2, LAMB2, FOXF1, MMP2, NPNT, MMP9, GREM1, COL1A1, COL3A1, MMP14, COL5A3, MMP17, COL6A1, VWA1, TGFBI, DDR2, MEGF9	817	292	20369	3.32989	1.09331e-06	4.02933e-07	3.91807e-07
GOTERM_BP_FAT	GO:0043062~extracellular structure organization	Extracellular Structure Organization	39	4.14453	1.79454e-10	ZFP469, COL15A1, COL16A1, ECM2, COL13A1, PAPLN, LTBP4, DPT, DMP1, FBLN1, LOXL2, ADAMTSL1, ADAMTS5, ADAMTS2, EFEMP2, ADAMTSL2, SH3PXD2B, MMP28, ADAMTS17, HAS3, SERPINH1, ADAMTS7, TGFB2, LAMB2, FOXF1, MMP2, NPNT, MMP9, GREM1, COL1A1, COL3A1, MMP14, COL5A3, MMP17, COL6A1, VWA1, TGFBI, DDR2, MEGF9	817	293	20369	3.31852	1.2088e-06	4.02933e-07	3.91807e-07
GOTERM_BP_FAT	GO:0051960~regulation of nervous system development	Regulation Of Nervous System Development	56	5.95112	5.01318e-09	PTPRS, NCMAP, GLI3, CX3CL1, CDH2, ADGRE5, MYB, ENPP2, PLXNC1, EPHB2, EPHB1, SEMA6C, HES6, TRPC6, SERPINF1, SOX11, NGF, TNFRSF1B, CIT, TBC1D24, ULK2, HAP1, ADNP, ARHGEF2, OBSL1, FXN, SEMA7A, SMARCD3, HDAC1, AMIGO1, LEF1, AMIGO2, SRRT, PTN, WDR62, THBS2, NTN1, DLL1, LRP8, TYMP, GBX2, E2F1, DISC1, PLXNA3, FZD3, LGI4, VEGFC, L1CAM, HEYL, CD24A, CDK5, CAPRIN2, ADGRL1, PLXNB1, AGRN, EZH2	817	588	20369	2.37442	3.37682e-05	8.4422e-06	8.20909e-06
GOTERM_BP_FAT	GO:0051240~positive regulation of multicellular organismal process	Positive Regulation Of Multicellular Organismal Process	130	13.8151	7.57896e-09	SLC27A1, TFRC, IFI213, ARID4B, PLAT, NCMAP, AQP1, LOXL2, RGS4, EDNRA, ZC3H12A, MYB, LIPG, ENPP2, CCN4, CCN3, PLXNC1, EPHB2, EPHB1, SOX5, ARRDC4, PDGFRB, RSAD2, SERPINF1, CTNNBIP1, SOX11, NPNT, OLFM1, TBC1D24, APLNR, PKP1, ADNP, OBSL1, PDE9A, GPLD1, FBN2, GRIA1, SEMA7A, NOTCH4, IL4RA, LY96, LTBP3, WDR62, ACACB, IQGAP3, ACAT2, MNDAL, SPTA1, C3, HRH1, ST3GAL4, NCKAP1L, WNT4, NLRP4F, FZD3, TGFB2, AFA…	817	1955	20369	1.65785	5.10506e-05	9.15398e-06	8.90122e-06
GOTERM_BP_FAT	GO:0019219~regulation of nucleobase-containing compound metabolic process	Regulation Of Nucleobase-Containing Compound Metabolic Process	237	25.186	8.15379e-09	ZFP963, ANKLE1, TFRC, ZFP967, ZFP966, ZFP606, 9030624G23RIK, RPS6KA4, CREB3L3, CREB3L4, ZC3H12A, MYB, TRIM24, HOXA6, SOX7, SOX5, HES6, ZFP973, ENDOG, ZFP979, METTL1, MED8, SOX11, EWSR1, TXNIP, A630089N07RIK, DXO, DNA2, ZFP971, PLPP3, ZFP970, HOXB6, ZFP985, RTEL1, ZBTB8A, MEAF6, CTBP1, TSHZ1, ZFP866, XPA, MNDAL, ZNHIT1, MRNIP, ZFP182, HOXC5, ZFP981, SNX5, AFAP1L2, EGR3, ZFP873, FOXF1, FZD7, FZD6, …	817	4218	20369	1.40084	5.49224e-05	9.15398e-06	8.90122e-06
GOTERM_BP_FAT	GO:2000026~regulation of multicellular organismal development	Regulation Of Multicellular Organismal Development	115	12.221	9.94743e-09	DMP1, SLC4A2, NCMAP, AQP1, LOXL2, RGS4, RPS6KA6, CDH2, ZC3H12A, MYB, ENPP2, CCN4, PLXNC1, EPHB2, EPHB1, SOX5, HES6, SEMA6C, SERPINF1, CTNNBIP1, SOX11, MYCL, MAF, FANCD2, RBP1, TBC1D24, APLNR, PKP1, ULK2, ADNP, OBSL1, FBN2, SEMA7A, MEAF6, NOTCH4, IL4RA, LTBP3, WDR62, ACACB, C3, NCKAP1L, WNT4, PLXNA3, NLRP4F, FZD3, TGFB2, EGR3, BRPF3, FANCA, IRGM1, ISG15, L1CAM, MAFB, CDK5, CAPRIN2, PLXNB1, FGFR2, …	817	1669	20369	1.71787	6.70036e-05	9.57227e-06	9.30795e-06
GOTERM_BP_FAT	GO:0010556~regulation of macromolecule biosynthetic process	Regulation Of Macromolecule Biosynthetic Process	295	31.3496	2.2495e-08	ZFP963, TFRC, ZFP967, ZFP966, LDLRAD3, ZFP606, 9030624G23RIK, RPS6KA4, CREB3L3, CREB3L4, H2AC10, ZC3H12A, MYB, HABP4, TRIM24, CCN4, CCN3, HOMER3, EPHB2, HOXA6, SOX7, SOX5, ARRDC4, HES6, WDHD1, ZFP973, PAQR4, ZFP979, RSAD2, METTL1, IFRD2, SERPINF1, MED8, SOX11, SIGIRR, MARF1, EWSR1, TXNIP, A630089N07RIK, DXO, ZFP971, PLPP3, ZFP970, HOXB6, ZFP985, ZBTB8A, MEAF6, CTBP1, TSHZ1, ZFP866, XPA, TEX19.1, …	817	5578	20369	1.31853	0.000151515	1.89408e-05	1.84177e-05
GOTERM_BP_FAT	GO:0010468~regulation of gene expression	Regulation Of Gene Expression	286	30.3932	1.14469e-07	ZFP963, TFRC, ZFP967, ZFP966, LDLRAD3, ZFP606, 9030624G23RIK, RPS6KA4, CREB3L3, CREB3L4, H2AC10, ZC3H12A, MYB, HABP4, TRIM24, CCN4, CCN3, HOMER3, EPHB2, HOXA6, SOX7, SOX5, ARRDC4, HES6, WDHD1, ZFP973, ZFP979, RSAD2, METTL1, IFRD2, SERPINF1, MED8, SOX11, SIGIRR, MARF1, EWSR1, TXNIP, A630089N07RIK, DXO, ZFP971, PLPP3, ZFP970, HOXB6, ZFP985, ZBTB8A, MEAF6, CTBP1, TSHZ1, ZFP866, XPA, TEX19.1, PPL, IQ…	817	5460	20369	1.30593	0.000770767	8.56738e-05	8.33081e-05
GOTERM_BP_FAT	GO:0006355~regulation of DNA-templated transcription	Regulation Of Dna-Templated Transcription	203	21.5728	2.13303e-07	ZFP963, TFRC, ZFP967, ZFP966, ZFP606, 9030624G23RIK, RPS6KA4, CREB3L3, CREB3L4, ZC3H12A, MYB, TRIM24, HOXA6, SOX7, SOX5, HES6, ZFP973, ZFP979, MED8, SOX11, EWSR1, TXNIP, A630089N07RIK, ZFP971, PLPP3, ZFP970, HOXB6, ZFP985, ZBTB8A, MEAF6, CTBP1, TSHZ1, ZFP866, XPA, MNDAL, ZNHIT1, ZFP182, HOXC5, ZFP981, SNX5, AFAP1L2, EGR3, ZFP873, FOXF1, FZD7, FZD6, PLK1, NR2F2, COL1A1, HOXD9, HOXD8, EZH2, CDKN1C,…	817	3622	20369	1.39732	0.00143578	0.000128737	0.000125182
GOTERM_BP_FAT	GO:0051094~positive regulation of developmental process	Positive Regulation Of Developmental Process	106	11.2646	2.1488e-07	TFRC, CRTC1, ARID4B, SLC4A2, AQP1, LOXL2, EDNRA, EFEMP2, ZC3H12A, MYB, ENPP2, PIEZO1, CCN4, CCN3, PLXNC1, EPHB2, EPHB1, MAP3K5, SOX5, SERPINF1, IGFBP3, CTNNBIP1, SOX11, NPNT, OLFM1, TMEM79, TBC1D24, APLNR, PKP1, ADNP, OBSL1, FBN2, SEMA7A, NOTCH4, IL4RA, LTBP3, WDR62, ACACB, IQGAP3, C3, ZNHIT1, NCKAP1L, WNT4, NLRP4F, FZD3, TGFB2, EGR3, IRGM1, ISG15, L1CAM, CYP51, COL1A1, CAPRIN2, PLXNB1, OGT, FGFR…	817	1589	20369	1.66314	0.00144638	0.000128737	0.000125182
GOTERM_BP_FAT	GO:0050767~regulation of neurogenesis	Regulation Of Neurogenesis	45	4.78215	2.44441e-07	SEMA7A, PTPRS, SMARCD3, HDAC1, AMIGO1, LEF1, SRRT, PTN, WDR62, DLL1, LRP8, NTN1, CX3CL1, GLI3, MYB, ENPP2, E2F1, PLXNC1, EPHB2, DISC1, PLXNA3, SEMA6C, HES6, FZD3, TRPC6, SERPINF1, VEGFC, SOX11, NGF, L1CAM, TNFRSF1B, CIT, CD24A, HEYL, CDK5, CAPRIN2, TBC1D24, ULK2, PLXNB1, HAP1, ADNP, ARHGEF2, FXN, OBSL1, EZH2	817	476	20369	2.35697	0.0016452	0.000128737	0.000125182
GOTERM_BP_FAT	GO:2001141~regulation of RNA biosynthetic process	Regulation Of Rna Biosynthetic Process	203	21.5728	2.48454e-07	ZFP963, TFRC, ZFP967, ZFP966, ZFP606, 9030624G23RIK, RPS6KA4, CREB3L3, CREB3L4, ZC3H12A, MYB, TRIM24, HOXA6, SOX7, SOX5, HES6, ZFP973, ZFP979, MED8, SOX11, EWSR1, TXNIP, A630089N07RIK, ZFP971, PLPP3, ZFP970, HOXB6, ZFP985, ZBTB8A, MEAF6, CTBP1, TSHZ1, ZFP866, XPA, MNDAL, ZNHIT1, ZFP182, HOXC5, ZFP981, SNX5, AFAP1L2, EGR3, ZFP873, FOXF1, FZD7, FZD6, PLK1, NR2F2, COL1A1, HOXD9, HOXD8, EZH2, CDKN1C,…	817	3631	20369	1.39385	0.00167218	0.000128737	0.000125182
GOTERM_BP_FAT	GO:0001501~skeletal system development	Skeletal System Development	50	5.3135	3.03387e-07	CDKN1C, ECM1, DNM3OS, GLI3, PHEX, EDNRA, HYAL2, SH3PXD2B, CCN4, ACP2, CCN3, HOXA6, SOX5, ADAMTS7, PDGFRB, MMP2, SOX11, MMP9, PEX7, MMP14, EVC, COL6A1, GAS1, GPLD1, HOXB6, DDR2, FBN2, LAMA5, DLX3, COL13A1, B3GLCT, LTBP3, HSD17B7, RECQL4, RAI1, HOXC5, SERPINH1, TBX1, TGFB2, ZFP950, TBX3, DLK1, COL1A1, 2610005L07RIK, COL3A1, PLXNB1, TGFBI, HOXD9, HOXD8, FGFR2	817	562	20369	2.2181	0.00204153	0.00014015	0.00013628
GOTERM_BP_FAT	GO:0051252~regulation of RNA metabolic process	Regulation Of Rna Metabolic Process	215	22.848	3.12092e-07	ZFP963, TFRC, ZFP967, ZFP966, ZFP606, 9030624G23RIK, RPS6KA4, CREB3L3, CREB3L4, ZC3H12A, MYB, TRIM24, HOXA6, SOX7, SOX5, HES6, ZFP973, ZFP979, METTL1, MED8, SOX11, EWSR1, TXNIP, A630089N07RIK, DXO, ZFP971, PLPP3, ZFP970, HOXB6, ZFP985, ZBTB8A, MEAF6, CTBP1, TSHZ1, ZFP866, XPA, MNDAL, ZNHIT1, ZFP182, HOXC5, ZFP981, SNX5, AFAP1L2, EGR3, ZFP873, FOXF1, FZD7, FZD6, PLK1, NR2F2, COL1A1, HOXD9, HOXD8, …	817	3909	20369	1.37126	0.00210004	0.00014015	0.00013628
GOTERM_BP_FAT	GO:0051128~regulation of cellular component organization	Regulation Of Cellular Component Organization	161	17.1095	3.69145e-07	N6AMT1, COL16A1, TFRC, CRTC1, IFI213, CCNF, HJURP, SLC4A2, ZDHHC2, AQP1, RGS4, EFEMP2, CDH2, TBC1D30, TRAPPC12, ENPP2, PIEZO1, CCN4, CCN3, KNTC1, PLXNC1, EPHB2, SYNPO, EPHB1, PDGFRB, WDHD1, SEMA6C, CEP135, ENDOG, IGFBP5, SERPINF1, IGFBP3, GLCE, CTNNBIP1, MAGI2, CEP131, PRPF4B, KNL1, SRCIN1, ST7L, OLFM1, ACAP3, MAP1A, TBC1D24, APLNR, ULK2, ANAPC5, ADNP, NPTXR, OBSL1, H2-D1, HDGFL3, PFN2, ZFP469, G…	817	2740	20369	1.46495	0.00248348	0.000149877	0.000145738
GOTERM_BP_FAT	GO:0006357~regulation of transcription by RNA polymerase II	Regulation Of Transcription By Rna Polymerase Ii	158	16.7906	3.78252e-07	ZFP446, ZFP963, ZFP566, CRTC1, IFI213, ZFP966, ARID4B, YEATS4, ZFP606, LOXL2, RPS6KA4, CREB3L3, CREB3L4, ZC3H12A, MYB, HOXA6, SOX7, SOX5, HES6, ZFP973, ZFP697, ZFP979, CTNNBIP1, MED8, SOX11, NPNT, MYCL, MAF, ZFP41, FKBP8, TXNIP, PKP1, ADNP, ZFP971, ZFP970, SQSTM1, HOXB6, ZFP469, ZFP985, ZBTB8A, DLX3, CTBP1, TSHZ1, NOTCH4, ZFP866, GLIS3, XPA, AEBP1, MNDAL, RAI1, ZNHIT1, ZFP182, ZKSCAN7, NACC2, HOX…	817	2677	20369	1.47149	0.00254466	0.000149877	0.000145738
GOTERM_BP_FAT	GO:0045597~positive regulation of cell differentiation	Positive Regulation Of Cell Differentiation	75	7.97024	1.01654e-06	BTG1, GLI3, CX3CL1, LOXL2, CD1D1, EFEMP2, MYB, ZC3H12A, SH3PXD2B, ENPP2, CCN4, PRKG2, PIEZO1, CCN3, PLXNC1, EPHB2, MAP3K5, SOX5, TRPC6, IGFBP3, SERPINF1, CTNNBIP1, SOX11, TENT5A, NGF, TNFRSF1B, NPNT, SIRT1, OLFM1, IMPACT, MMP14, TBC1D24, PKP1, HAP1, ADNP, ARHGEF2, OBSL1, FXN, DDR2, FBN2, SEMA7A, SMARCD3, HDAC1, AMIGO1, NOTCH4, LEF1, SRRT, IL4RA, PTN, LTBP3, WDR62, NTN1, LRP8, ZNHIT1, E2F1, NCKAP1…	817	1037	20369	1.80314	0.00682405	0.000380413	0.000369909
GOTERM_BP_FAT	GO:0022008~neurogenesis	Neurogenesis	104	11.0521	1.56746e-06	NCMAP, SAMD14, EDNRA, CDH2, TUBB3, GNAT1, EPHB2, EPHB1, SOX5, SEMA6C, UNC5B, SOX11, TUG1, ACAP3, OMP, GPRIN1, MAP1A, TBC1D24, FKBP8, ULK2, ADNP, PLPP3, NPTXR, HDGFL3, GPM6A, SEMA7A, DLX3, TOMT, WDR62, C3, BTBD2, NCKAP1L, WNT4, PLXNA3, ABCA2, NTNG2, FZD3, TGFB2, DTNB, ATP8B1, DCLK2, NR2F2, L1CAM, DCLK1, NR4A2, EFNA2, CDK5, TBCE, LHX6, PLXNB1, HOXD9, FGFR2, GSDME, DDR1, CDKN1C, GABRB1, GLI3, CX3CL1…	817	1617	20369	1.60351	0.0105029	0.000555705	0.00054036
GOTERM_BP_FAT	GO:0009966~regulation of signal transduction	Regulation Of Signal Transduction	182	19.3411	1.74794e-06	OTUD5, JRK, TFRC, 2810408A11RIK, IFI213, NRK, RTKN2, ARID4B, RGS4, EDNRA, RPS6KA6, RGS3, CDH2, ZC3H12A, TRIM24, CCN4, HOMER3, CCN3, PIM2, EPHB2, EPHB1, SOX7, MAP3K5, PDGFRB, ENDOG, RSAD2, IGFBP5, UNC5B, IGFBP3, GLCE, CTNNBIP1, MAGI2, ALG13, SOX11, PRPF4B, KNL1, NPNT, SIGIRR, PIGBOS1, FANCD2, TBC1D24, FKBP8, APLNR, ADNP, AIPL1, KCTD12, PLPP3, SQSTM1, FBN2, GRIA1, SEMA7A, NOTCH4, HTRA3, LY96, FBLN1…	817	3267	20369	1.3889	0.0117051	0.000588707	0.000572452
GOTERM_BP_FAT	GO:0001568~blood vessel development	Blood Vessel Development	50	5.3135	2.93914e-06	RTL1, ECM1, CLEC14A, GLI3, CX3CL1, LOXL2, AQP1, EDNRA, EFEMP2, CDH2, ZC3H12A, RSPO3, FLVCR2, CCN3, EPHB2, EPHB1, PDGFRB, UNC5B, MMP2, ABCC9, SIRT1, GREM1, MMP14, APLNR, CDH13, PLPP3, GPLD1, BECN1, DLX3, NOTCH4, LEF1, PRCP, DLL1, ARHGAP22, GBX2, TBX1, CCDC134, TGFB2, ZFP950, EGR3, FOXF1, VEGFC, NR2F2, HSPA12B, TBX3, WARS2, COL1A1, COL3A1, TGFBI, FGFR2	817	608	20369	2.05028	0.0196034	0.000906076	0.000881057
GOTERM_BP_FAT	GO:0048514~blood vessel morphogenesis	Blood Vessel Morphogenesis	43	4.56961	2.95927e-06	BECN1, RTL1, ECM1, NOTCH4, LEF1, PRCP, CLEC14A, DLL1, CX3CL1, LOXL2, ARHGAP22, EFEMP2, EDNRA, GBX2, CDH2, ZC3H12A, RSPO3, FLVCR2, CCN3, EPHB2, EPHB1, TBX1, PDGFRB, CCDC134, TGFB2, EGR3, ZFP950, UNC5B, FOXF1, MMP2, VEGFC, NR2F2, HSPA12B, SIRT1, WARS2, GREM1, COL3A1, MMP14, APLNR, CDH13, TGFBI, GPLD1, FGFR2	817	488	20369	2.19683	0.0197363	0.000906076	0.000881057
GOTERM_BP_FAT	GO:0051962~positive regulation of nervous system development	Positive Regulation Of Nervous System Development	37	3.93199	3.11814e-06	SEMA7A, SMARCD3, HDAC1, AMIGO1, AMIGO2, SRRT, PTN, WDR62, THBS2, LRP8, NTN1, CX3CL1, GLI3, ADGRE5, MYB, ENPP2, E2F1, PLXNC1, EPHB2, DISC1, EPHB1, FZD3, SERPINF1, VEGFC, SOX11, NGF, L1CAM, TNFRSF1B, CAPRIN2, TBC1D24, ADGRL1, PLXNB1, HAP1, ADNP, AGRN, FXN, OBSL1	817	390	20369	2.36529	0.0207848	0.000911957	0.000886775
GOTERM_BP_FAT	GO:0019220~regulation of phosphate metabolic process	Regulation Of Phosphate Metabolic Process	79	8.39532	3.24925e-06	CDKN1C, CD40, SLC27A1, TFRC, MCM7, CX3CL1, SPN, EDNRA, UCHL1, HYAL2, ZC3H12A, ME1, ENPP2, EPHB2, MAP3K5, PDGFRB, MAP4K2, TRPC6, IGFBP3, GFRA1, NGF, NPNT, SIRT1, SRCIN1, CBFA2T3, MMP9, GFRA2, LIME1, GREM1, IMPACT, FKBP8, APLNR, ADNP, ARHGEF2, PLPP3, SQSTM1, GPLD1, DDR2, PFN2, SEMA7A, PCX, CAB39, WNK4, MLLT1, FBLN1, IL6RA, ADCY8, LRP8, IQGAP3, C3, MRNIP, GPNMB, AMDHD2, NCKAP1L, CLSPN, GBP4, STOX1, …	817	1148	20369	1.71567	0.0216492	0.000911957	0.000886775
GOTERM_BP_FAT	GO:0051174~regulation of phosphorus metabolic process	Regulation Of Phosphorus Metabolic Process	79	8.39532	3.56322e-06	CDKN1C, CD40, SLC27A1, TFRC, MCM7, CX3CL1, SPN, EDNRA, UCHL1, HYAL2, ZC3H12A, ME1, ENPP2, EPHB2, MAP3K5, PDGFRB, MAP4K2, TRPC6, IGFBP3, GFRA1, NGF, NPNT, SIRT1, SRCIN1, CBFA2T3, MMP9, GFRA2, LIME1, GREM1, IMPACT, FKBP8, APLNR, ADNP, ARHGEF2, PLPP3, SQSTM1, GPLD1, DDR2, PFN2, SEMA7A, PCX, CAB39, WNK4, MLLT1, FBLN1, IL6RA, ADCY8, LRP8, IQGAP3, C3, MRNIP, GPNMB, AMDHD2, NCKAP1L, CLSPN, GBP4, STOX1, …	817	1150	20369	1.71268	0.0237161	0.00093979	0.00091384
GOTERM_BP_FAT	GO:0001944~vasculature development	Vasculature Development	52	5.52604	3.62746e-06	RTL1, ECM1, CLEC14A, GLI3, CX3CL1, LOXL2, AQP1, EDNRA, EFEMP2, CDH2, SGCB, ZC3H12A, RSPO3, FLVCR2, CCN3, EPHB2, EPHB1, PDGFRB, UNC5B, MMP2, ABCC9, SIRT1, GREM1, MMP14, APLNR, CDH13, PLPP3, GPLD1, BECN1, DLX3, NOTCH4, LEF1, PRCP, DLL1, ARHGAP22, C3, GBX2, TBX1, CCDC134, TGFB2, ZFP950, EGR3, FOXF1, VEGFC, NR2F2, HSPA12B, TBX3, WARS2, COL1A1, COL3A1, TGFBI, FGFR2	817	648	20369	2.00067	0.0241385	0.00093979	0.00091384
GOTERM_BP_FAT	GO:0007399~nervous system development	Nervous System Development	137	14.559	4.44379e-06	ZDHHC2, NCMAP, AQP1, RGS4, SAMD14, EDNRA, CDH2, TUBB3, ZC3H12A, GNAT1, PLXNC1, EPHB2, EPHB1, SOX5, HES6, SEMA6C, UNC5B, MAGI2, SOX11, TUG1, ACAP3, OMP, FANCD2, GPRIN1, MAP1A, TBC1D24, FKBP8, ULK2, ADNP, PLPP3, NPTXR, HDGFL3, GRIA1, GPM6A, SEMA7A, DLX3, TOMT, B3GLCT, WDR62, C3, BTBD2, NCKAP1L, WNT4, PLXNA3, CCDC134, ABCA2, NTNG2, FZD3, TGFB2, STIL, EGR3, DTNB, ATP8B1, FZD6, DCLK2, NR2F2, L1CAM, DC…	817	2341	20369	1.45904	0.0294899	0.00104147	0.00101272
GOTERM_BP_FAT	GO:0045937~positive regulation of phosphate metabolic process	Positive Regulation Of Phosphate Metabolic Process	55	5.84485	4.48378e-06	CD40, TFRC, CX3CL1, SPN, EDNRA, UCHL1, ENPP2, MAP3K5, PDGFRB, MAP4K2, TRPC6, GFRA1, NGF, NPNT, SIRT1, SRCIN1, MMP9, GREM1, APLNR, ADNP, ARHGEF2, PLPP3, SQSTM1, GPLD1, DDR2, PFN2, SEMA7A, PCX, CAB39, WNK4, IL6RA, ADCY8, LRP8, IQGAP3, C3, MRNIP, GPNMB, NCKAP1L, CLSPN, STOX1, IP6K2, TBX1, TGFB2, STIL, FZD7, PLK1, VEGFC, IRGM1, MAPK15, CD24A, CDK5, ERCC6, AGRN, OGT, EZH2	817	707	20369	1.93951	0.0297512	0.00104147	0.00101272
GOTERM_BP_FAT	GO:0010562~positive regulation of phosphorus metabolic process	Positive Regulation Of Phosphorus Metabolic Process	55	5.84485	4.48378e-06	CD40, TFRC, CX3CL1, SPN, EDNRA, UCHL1, ENPP2, MAP3K5, PDGFRB, MAP4K2, TRPC6, GFRA1, NGF, NPNT, SIRT1, SRCIN1, MMP9, GREM1, APLNR, ADNP, ARHGEF2, PLPP3, SQSTM1, GPLD1, DDR2, PFN2, SEMA7A, PCX, CAB39, WNK4, IL6RA, ADCY8, LRP8, IQGAP3, C3, MRNIP, GPNMB, NCKAP1L, CLSPN, STOX1, IP6K2, TBX1, TGFB2, STIL, FZD7, PLK1, VEGFC, IRGM1, MAPK15, CD24A, CDK5, ERCC6, AGRN, OGT, EZH2	817	707	20369	1.93951	0.0297512	0.00104147	0.00101272
GOTERM_BP_FAT	GO:0048699~generation of neurons	Generation Of Neurons	90	9.56429	5.31483e-06	DDR1, CDKN1C, GABRB1, GLI3, SAMD14, EDNRA, UCHL1, TUBB3, GNAT1, EPHB2, NEFH, EPHB1, SOX5, SEMA6C, CRPPA, UNC5B, MMP2, EN1, SOX11, GFRA1, NGF, TUG1, CIT, PEX7, ACAP3, RP1, IMPACT, GPRIN1, CDH11, MAP1A, FKBP8, TBC1D24, ULK2, GAS1, EVL, HAP1, ADNP, ARHGEF2, NPTXR, HDGFL3, LAMA5, BECN1, GPM6A, SEMA7A, DLX3, TOMT, HDAC1, ATL1, AMIGO1, LEF1, PTN, NTN1, DLL1, LRP8, C3, GBX2, GPC2, NCKAP1L, DISC1, ATP9A,…	817	1380	20369	1.62596	0.0351675	0.00109929	0.00106894
GOTERM_BP_FAT	GO:0010564~regulation of cell cycle process	Regulation Of Cell Cycle Process	59	6.26993	5.38205e-06	CDKN1C, UBXN2B, CCNF, CHTF18, EME2, KNTC1, PDGFRB, KLF11, PARP3, RMI2, CEP131, KIF23, PRPF4B, KNL1, SIRT1, KNSTRN, MLF1, CIT, FANCD2, GAS1, ANAPC5, GNB1L, KIF20A, DNA2, OBSL1, DDR2, BECN1, SMARCD3, CDCA2, DCTN1, CEP295NL, LEF1, WDR62, PKMYT1, RECQL4, ZNHIT1, MRNIP, GPNMB, E2F1, CLSPN, STOX1, WNT4, TBX1, STIL, CDKN2C, RRM2, PLK1, MIIP, ATP2B4, MAPK15, NDC80, CDK5, GIPC1, CDK10, NCAPD2, ERCC6, FGFR…	817	784	20369	1.87622	0.0356043	0.00109929	0.00106894
GOTERM_BP_FAT	GO:0022402~cell cycle process	Cell Cycle Process	66	7.01382	5.44737e-06	ANKLE1, MCM7, UBXN2B, DSCC1, CCNF, HJURP, CHTF18, KIF15, EDNRA, EME2, WDR90, MYB, TRAPPC12, RTTN, KNTC1, PIM2, CNTD1, CEP135, KIF23, HAUS6, KNL1, MASTL, KNSTRN, CIT, KIF4, SGO1, MARF1, ESPL1, FANCD2, KIF20A, ARHGEF2, DNA2, BECN1, RTEL1, CDCA2, DCTN1, AKAP8, TEX19.1, WDR62, IQGAP3, RECQL4, MRNIP, CLSPN, FILIP1L, WNT4, GINS1, STIL, FANCM, PLK1, SEPTIN5, FANCA, MND1, MLH1, NDC80, KIF18B, TBCE, CENPL…	817	915	20369	1.79833	0.0360285	0.00109929	0.00106894
GOTERM_BP_FAT	GO:0006950~response to stress	Response To Stress	204	21.6791	5.50444e-06	ANKLE1, TFRC, IFIT1, IFIT3, AQP1, RPS6KA4, EDNRA, ENDOV, RPS6KA6, 1810014B01RIK, CREB3L3, CREB3L4, ZC3H12A, MYB, HERC6, XNDC1, GBP6, WDHD1, ENDOG, RSAD2, GBP9, METTL1, KNL1, SIGIRR, MARF1, NEIL3, EID3, PSME4, TXNIP, ULK2, DNA2, PLPP3, RTEL1, XPA, WNK4, PPL, MNDAL, C3, NUAK1, MRNIP, MCTS1, AFAP1L2, FOXF1, FZD7, FZD6, PLK1, IRGM1, IFI47, CP, VASN, COL1A1, LACC1, FASN, EZH2, ATR, GSDME, DDR1, ECM1, …	817	3816	20369	1.33281	0.036399	0.00109929	0.00106894
GOTERM_BP_FAT	GO:0042327~positive regulation of phosphorylation	Positive Regulation Of Phosphorylation	51	5.41977	5.54869e-06	CD40, TFRC, CX3CL1, SPN, EDNRA, ENPP2, MAP3K5, PDGFRB, MAP4K2, TRPC6, GFRA1, NGF, SIRT1, SRCIN1, MMP9, GREM1, APLNR, ADNP, ARHGEF2, PLPP3, SQSTM1, DDR2, PFN2, SEMA7A, CAB39, WNK4, IL6RA, ADCY8, LRP8, IQGAP3, C3, MRNIP, GPNMB, NCKAP1L, CLSPN, STOX1, IP6K2, TBX1, TGFB2, STIL, FZD7, PLK1, VEGFC, IRGM1, MAPK15, CD24A, CDK5, ERCC6, AGRN, OGT, EZH2	817	640	20369	1.98673	0.0366862	0.00109929	0.00106894
GOTERM_BP_FAT	GO:0009887~animal organ morphogenesis	Animal Organ Morphogenesis	78	8.28905	6.02042e-06	DDR1, SLC4A2, GLI3, PHEX, AQP1, ADAMTS5, EDNRA, EFEMP2, CDH2, HYAL2, SH3PXD2B, GNAT1, EPHB2, EPHB1, SOX5, PDGFRB, IGFBP5, MMP2, CTNNBIP1, SOX11, ABCC9, NPNT, GREM1, ALDH1A3, PEX7, OLFM1, RP1, MMP14, FANCD2, TNNT2, COL6A1, APLNR, GAS1, HOXB6, FBN2, LAMA5, SMARCD3, DLX3, COL13A1, HDAC1, TSHZ1, LEF1, WNK4, PTN, LTBP3, NTN1, DLL1, TYMP, TTN, RECQL4, GBX2, SERPINH1, GCNT4, WNT4, TBX1, NEK8, IRX1, NTNG…	817	1147	20369	1.69543	0.0397424	0.00115867	0.00112668
GOTERM_BP_FAT	GO:0001525~angiogenesis	Angiogenesis	35	3.71945	7.20734e-06	BECN1, RTL1, ECM1, NOTCH4, LEF1, PRCP, CLEC14A, DLL1, CX3CL1, LOXL2, ARHGAP22, EDNRA, GBX2, ZC3H12A, RSPO3, FLVCR2, CCN3, EPHB2, EPHB1, TBX1, PDGFRB, CCDC134, EGR3, UNC5B, MMP2, VEGFC, HSPA12B, SIRT1, GREM1, MMP14, APLNR, CDH13, TGFBI, GPLD1, FGFR2	817	372	20369	2.3457	0.0473892	0.00134857	0.00131134
GOTERM_BP_FAT	GO:0030155~regulation of cell adhesion	Regulation Of Cell Adhesion	62	6.58874	7.54802e-06	DDR1, COL16A1, ECM2, TFRC, DMP1, SLC4A2, ZDHHC2, GLI3, CX3CL1, SPN, CD1D1, EFEMP2, C1QTNF1, ZC3H12A, ENPP2, PIEZO1, PLXNC1, EPHB2, CYTIP, JAK3, MMP2, MAGI2, NPNT, SRCIN1, GREM1, MMP14, MMRN1, CDH13, PKP1, PLPP3, LAMA5, SMARCD3, NOTCH4, LEF1, IL4RA, ILDR2, FBLN1, IL6RA, PTN, SPG7, FUT2, DLL1, SPTA1, NUAK1, GPNMB, ST3GAL4, NCKAP1L, DISC1, PAG1, WNT4, TGFB2, CD209C, EGR3, LAMB2, FOXF1, FZD7, VEGFC, …	817	849	20369	1.82067	0.0495728	0.00137415	0.0013362
GOTERM_BP_FAT	GO:0010646~regulation of cell communication	Regulation Of Cell Communication	207	21.9979	7.93597e-06	JRK, TFRC, 2810408A11RIK, ZDHHC2, EDNRA, RPS6KA6, ZC3H12A, MYB, TRIM24, CCN4, CCN3, HOMER3, EPHB2, SYNPO, SOX7, EPHB1, ENDOG, RSAD2, UNC5B, GLCE, SOX11, KNL1, SIGIRR, MAP1A, KCTD12, PLPP3, GPLD1, PFN2, IQGAP3, MNDAL, C3, ZNHIT1, NCKAP1L, SNX5, NTNG2, TRAP1, AFAP1L2, FZD7, FZD6, IRGM1, ABCA7, L1CAM, VASN, COL1A1, GRIN3B, GIPC1, CDK10, RGL2, EZH2, ATR, GSDME, DDR1, CDKN1C, ECM1, CD40, PTPRS, GLI3, …	817	3903	20369	1.32227	0.0520532	0.00140675	0.00136791
GOTERM_BP_FAT	GO:0001934~positive regulation of protein phosphorylation	Positive Regulation Of Protein Phosphorylation	49	5.20723	8.407e-06	CD40, TFRC, CX3CL1, SPN, EDNRA, ENPP2, MAP3K5, PDGFRB, MAP4K2, TRPC6, GFRA1, NGF, SIRT1, SRCIN1, MMP9, GREM1, APLNR, ADNP, ARHGEF2, PLPP3, SQSTM1, DDR2, PFN2, SEMA7A, CAB39, WNK4, IL6RA, ADCY8, LRP8, IQGAP3, C3, MRNIP, GPNMB, CLSPN, STOX1, IP6K2, TBX1, TGFB2, STIL, PLK1, VEGFC, IRGM1, MAPK15, CD24A, CDK5, ERCC6, AGRN, OGT, EZH2	817	614	20369	1.98964	0.0550562	0.00145204	0.00141195
GOTERM_BP_FAT	GO:0009888~tissue development	Tissue Development	122	12.9649	1.01106e-05	RTL1, OTUD5, ARID4B, DMP1, DNM3OS, AQP1, LOXL2, RGS4, EDNRA, EFEMP2, CDH2, TUBB3, CCN3, SOX7, SOX5, PDGFRB, SEMA6C, DGAT2, IGFBP5, IFRD2, CTNNBIP1, MAGI2, SOX11, NPNT, OLFM1, MAF, NUP210L, TMEM79, FKBP8, APLNR, TXNIP, PKP1, ALPK3, XIST, GPLD1, SEMA7A, DLX3, ARHGEF26, TOMT, NOTCH4, WNK4, LTBP3, TEX19.1, PPL, IQGAP3, C3, SERPINH1, LTA4H, WNT4, NTNG2, FZD3, TGFB2, STIL, FOXF1, FZD7, FZD6, GREB1, DHC…	817	2061	20369	1.47581	0.0658379	0.00170263	0.00165561
GOTERM_BP_FAT	GO:0023051~regulation of signaling	Regulation Of Signaling	206	21.8916	1.11037e-05	JRK, TFRC, 2810408A11RIK, ZDHHC2, EDNRA, RPS6KA6, ZC3H12A, MYB, TRIM24, CCN4, CCN3, HOMER3, EPHB2, SYNPO, SOX7, EPHB1, ENDOG, RSAD2, UNC5B, GLCE, SOX11, KNL1, SIGIRR, MAP1A, KCTD12, PLPP3, GPLD1, PFN2, IQGAP3, MNDAL, C3, ZNHIT1, NCKAP1L, SNX5, NTNG2, TRAP1, AFAP1L2, FZD7, FZD6, IRGM1, ABCA7, L1CAM, VASN, COL1A1, GRIN3B, GIPC1, CDK10, RGL2, EZH2, ATR, GSDME, DDR1, CDKN1C, ECM1, CD40, PTPRS, GLI3, …	817	3901	20369	1.31655	0.0720666	0.0017835	0.00173425
GOTERM_BP_FAT	GO:0045595~regulation of cell differentiation	Regulation Of Cell Differentiation	113	12.0085	1.11204e-05	ANKLE1, SLC4A2, LOXL2, RGS4, EFEMP2, ZC3H12A, MYB, ENPP2, PIEZO1, CCN4, CCN3, PLXNC1, EPHB2, EPHB1, MAP3K5, SOX5, HES6, SEMA6C, IGFBP5, SERPINF1, IGFBP3, CTNNBIP1, SOX11, NPNT, MYCL, OLFM1, MAF, FANCD2, RBP1, TBC1D24, PKP1, ULK2, ADNP, OBSL1, FBN2, SEMA7A, MEAF6, NOTCH4, IL4RA, LTBP3, WDR62, ZNHIT1, NCKAP1L, WNT4, PLXNA3, FZD3, TGFB2, EGR3, BRPF3, FZD7, FANCA, IRGM1, ISG15, L1CAM, VASN, CYP51, CO…	817	1876	20369	1.50173	0.0721706	0.0017835	0.00173425
GOTERM_BP_FAT	GO:0007049~cell cycle	Cell Cycle	72	7.65143	1.20691e-05	ANKLE1, MCM7, UBXN2B, DSCC1, CCNF, HJURP, CHTF18, CLGN, KIF15, EDNRA, TUBB3, EME2, WDR90, MYB, TRAPPC12, RTTN, KNTC1, PIM2, UTP14B, WDHD1, CNTD1, CEP135, KIF23, HAUS6, KNL1, MASTL, KNSTRN, CIT, KIF4, SGO1, MARF1, ESPL1, FANCD2, MNS1, KIF20A, ARHGEF2, DNA2, BECN1, RTEL1, CDCA2, DCTN1, AKAP8, TEX19.1, WDR62, PKMYT1, IQGAP3, RECQL4, MRNIP, CLSPN, FILIP1L, WNT4, GINS1, STIL, FANCM, PLK1, SEPTIN5, FAN…	817	1053	20369	1.70471	0.0780812	0.00189064	0.00183844
GOTERM_BP_FAT	GO:0042325~regulation of phosphorylation	Regulation Of Phosphorylation	69	7.33262	1.68966e-05	CDKN1C, CD40, TFRC, MCM7, CX3CL1, SPN, EDNRA, UCHL1, HYAL2, ZC3H12A, ENPP2, EPHB2, MAP3K5, PDGFRB, MAP4K2, TRPC6, IGFBP3, GFRA1, NGF, SIRT1, SRCIN1, MMP9, GFRA2, LIME1, GREM1, IMPACT, FKBP8, APLNR, ADNP, ARHGEF2, PLPP3, SQSTM1, DDR2, PFN2, SEMA7A, CAB39, WNK4, MLLT1, FBLN1, IL6RA, ADCY8, LRP8, IQGAP3, C3, MRNIP, GPNMB, NCKAP1L, CLSPN, GBP4, STOX1, IP6K2, TBX1, TGFB2, STIL, CDKN2C, FZD7, PLK1, VEG…	817	1005	20369	1.71171	0.107578	0.00254093	0.00247076
GOTERM_BP_FAT	GO:0050769~positive regulation of neurogenesis	Positive Regulation Of Neurogenesis	31	3.29437	1.71229e-05	SEMA7A, SMARCD3, HDAC1, AMIGO1, SRRT, PTN, WDR62, LRP8, NTN1, CX3CL1, GLI3, MYB, ENPP2, E2F1, PLXNC1, EPHB2, DISC1, FZD3, SERPINF1, VEGFC, SOX11, NGF, L1CAM, TNFRSF1B, CAPRIN2, TBC1D24, PLXNB1, HAP1, ADNP, FXN, OBSL1	817	322	20369	2.40023	0.108938	0.00254093	0.00247076
GOTERM_BP_FAT	GO:0001932~regulation of protein phosphorylation	Regulation Of Protein Phosphorylation	66	7.01382	1.73519e-05	CDKN1C, CD40, TFRC, CX3CL1, SPN, EDNRA, UCHL1, HYAL2, ZC3H12A, ENPP2, EPHB2, MAP3K5, PDGFRB, MAP4K2, TRPC6, IGFBP3, GFRA1, NGF, SIRT1, SRCIN1, MMP9, GFRA2, LIME1, GREM1, IMPACT, FKBP8, APLNR, ADNP, ARHGEF2, PLPP3, SQSTM1, DDR2, PFN2, SEMA7A, CAB39, WNK4, MLLT1, FBLN1, IL6RA, ADCY8, LRP8, IQGAP3, C3, MRNIP, GPNMB, CLSPN, GBP4, STOX1, IP6K2, TBX1, TGFB2, STIL, CDKN2C, PLK1, VEGFC, IRGM1, NR2F2, L1C…	817	949	20369	1.73391	0.110311	0.00254093	0.00247076
GOTERM_BP_FAT	GO:0010604~positive regulation of macromolecule metabolic process	Positive Regulation Of Macromolecule Metabolic Process	186	19.7662	2.15024e-05	N6AMT1, TFRC, CRTC1, IFI213, DSCC1, ARID4B, YEATS4, RPS6KA4, EDNRA, CREB3L3, CREB3L4, ZC3H12A, MYB, TRIM24, ENPP2, HABP4, PIM2, EPHB2, SOX7, MAP3K5, SOX5, ARRDC4, KCNH2, PDGFRB, HES6, ENDOG, RSAD2, IGFBP3, MED8, SOX11, NPNT, TUG1, SRCIN1, OLFM1, MAF, APLNR, PKP1, DXO, ADNP, DNA2, PLPP3, SQSTM1, GPLD1, PFN2, GRIA1, RTEL1, SEMA7A, DLX3, KHDRBS3, MEAF6, NOTCH4, GLIS3, XPA, IL4RA, WNK4, LY96, FBLN1, …	817	3491	20369	1.32834	0.134841	0.00308171	0.00299662
GOTERM_BP_FAT	GO:0009967~positive regulation of signal transduction	Positive Regulation Of Signal Transduction	105	11.1583	2.24489e-05	OTUD5, JRK, TFRC, NRK, RTKN2, RGS4, EDNRA, CDH2, ZC3H12A, CCN4, CCN3, PIM2, EPHB2, MAP3K5, PDGFRB, RSAD2, IGFBP5, UNC5B, IGFBP3, GLCE, SOX11, PRPF4B, KNL1, NPNT, TBC1D24, FKBP8, ADNP, PLPP3, GRIA1, SEMA7A, LY96, IQGAP3, C3, ZNHIT1, NACC2, NCKAP1L, IGFBP6, SNX5, WNT4, CCDC134, TGFB2, AFAP1L2, FZD7, IRGM1, ABCA7, L1CAM, NDC80, COL1A1, GIPC1, CAPRIN2, CDK10, PLXNB1, RGL2, OGT, FGFR2, ATR, GSDME, EZH…	817	1740	20369	1.50448	0.140339	0.00312869	0.0030423
GOTERM_BP_FAT	GO:0042127~regulation of cell population proliferation	Regulation Of Cell Population Proliferation	112	11.9022	2.27592e-05	TFRC, NRK, RTKN2, SLC4A2, IFIT3, AQP1, EDNRA, EFEMP2, CDH2, MYB, TRIM24, ENPP2, CCN4, CCN3, PIM2, EPHB2, EPHB1, SOX7, MAP3K5, PDGFRB, IGFBP5, SERPINF1, IGFBP3, GLCE, CTNNBIP1, MAGI2, CEP131, SOX11, APLNR, TXNIP, PDE9A, GPLD1, IL4RA, DPT, FBLN1, LTBP3, WDR62, FUT2, IQGAP3, SPTA1, ZNHIT1, NACC2, NCKAP1L, FZD3, TGFB2, EGR3, FOXF1, FANCL, FZD7, TNFRSF9, FANCA, IRGM1, HTR1B, DHCR24, NR2F2, SQLE, H19, …	817	1888	20369	1.47898	0.142134	0.00312869	0.0030423
GOTERM_BP_FAT	GO:0030182~neuron differentiation	Neuron Differentiation	83	8.8204	2.4055e-05	DDR1, CDKN1C, GABRB1, GLI3, SAMD14, EDNRA, UCHL1, TUBB3, GNAT1, EPHB2, NEFH, EPHB1, SOX5, SEMA6C, CRPPA, UNC5B, MMP2, EN1, SOX11, GFRA1, NGF, TUG1, CIT, RP1, IMPACT, GPRIN1, CDH11, MAP1A, FKBP8, TBC1D24, ULK2, GAS1, EVL, HAP1, ADNP, NPTXR, HDGFL3, LAMA5, BECN1, GPM6A, SEMA7A, DLX3, TOMT, HDAC1, ATL1, AMIGO1, PTN, NTN1, DLL1, LRP8, C3, GBX2, GPC2, NCKAP1L, DISC1, ATP9A, WNT4, PLXNA3, TBX1, IRX1, N…	817	1294	20369	1.59916	0.14959	0.00324069	0.00315121
GOTERM_BP_FAT	GO:0031344~regulation of cell projection organization	Regulation Of Cell Projection Organization	58	6.16366	2.50029e-05	DDR1, PTPRS, CRTC1, CX3CL1, AQP1, TCHP, CDH2, TBC1D30, ENPP2, PLXNC1, EPHB2, SEMA6C, TRPC6, CEP135, SERPINF1, GLCE, MAGI2, NGF, SIRT1, SRCIN1, CIT, ACAP3, RP1, TBC1D24, ULK2, EVL, HAP1, ADNP, MNS1, OBSL1, FXN, H2-D1, DDR2, PFN2, GPM6A, SEMA7A, AMIGO1, PTN, NTN1, LRP8, GPC2, EPS8L1, DISC1, PLXNA3, NTNG2, ATP8B1, L1CAM, MAPK15, GRIN1, CD24A, MPHOSPH9, CDK5, CAPRIN2, CDK10, PLXNB1, CNTROB, AGRN, EZH2	817	807	20369	1.79185	0.155002	0.00330234	0.00321115
GOTERM_BP_FAT	GO:0030199~collagen fibril organization	Collagen Fibril Organization	12	1.27524	2.66735e-05	GREM1, COL1A1, ZFP469, TGFB2, ADAMTS2, COL3A1, COL6A1, SERPINH1, DPT, LOXL2, DDR2, ADAMTS7	817	61	20369	4.90455	0.164459	0.00345525	0.00335984
GOTERM_BP_FAT	GO:0120035~regulation of plasma membrane bounded cell projection organization	Regulation Of Plasma Membrane Bounded Cell Projection Organization	57	6.05739	2.737e-05	DDR1, PTPRS, CRTC1, CX3CL1, AQP1, TCHP, CDH2, TBC1D30, ENPP2, PLXNC1, EPHB2, SEMA6C, TRPC6, CEP135, SERPINF1, MAGI2, NGF, SIRT1, SRCIN1, CIT, ACAP3, RP1, TBC1D24, ULK2, EVL, HAP1, ADNP, MNS1, OBSL1, FXN, H2-D1, DDR2, PFN2, GPM6A, SEMA7A, AMIGO1, PTN, NTN1, LRP8, GPC2, EPS8L1, DISC1, PLXNA3, NTNG2, ATP8B1, L1CAM, MAPK15, GRIN1, CD24A, MPHOSPH9, CDK5, CAPRIN2, CDK10, PLXNB1, CNTROB, AGRN, EZH2	817	791	20369	1.79658	0.168369	0.00347857	0.00338252
GOTERM_BP_FAT	GO:0035295~tube development	Tube Development	73	7.7577	2.79888e-05	DDR1, RTL1, ECM1, CLEC14A, SLC4A2, GLI3, CX3CL1, PHEX, LOXL2, AQP1, ADAMTS2, EDNRA, EFEMP2, CDH2, MYB, ZC3H12A, ADAMTSL2, RSPO3, FLVCR2, CCN3, EPHB2, EPHB1, PDGFRB, IGFBP5, UNC5B, MMP2, CTNNBIP1, EN1, SOX11, NPNT, SIRT1, GREM1, MMP14, COL6A1, FKBP8, APLNR, CDH13, GAS1, GPLD1, LAMA5, BECN1, NOTCH4, LEF1, WNK4, PRCP, LTBP3, NTN1, DLL1, ARHGAP22, C3, GBX2, LTA4H, FILIP1L, WNT4, TBX1, CCDC134, IRX1, …	817	1100	20369	1.65454	0.171829	0.00349135	0.00339494
GOTERM_BP_FAT	GO:0060322~head development	Head Development	61	6.48247	2.86501e-05	PTPRS, GLI3, AQP1, EDNRA, CDH2, HYDIN, FLVCR2, EPHB2, EPHB1, MMP2, EN1, SOX11, KNL1, NGF, ALDH1A3, MMP14, FANCD2, GAS1, HAP1, GRIA1, SEMA7A, HDAC1, AMIGO1, LEF1, AMIGO2, B3GLCT, WDR62, HSD17B7, DLL1, LRP8, TTN, GBX2, E2F1, DISC1, WNT4, PLXNA3, TBX1, CCDC134, FZD3, TGFB2, STIL, ZFP950, PCDH9, BNIP3, FZD6, ATP2B4, DCLK2, NR2F2, L1CAM, TBX3, DCLK1, GRIN1, COL1A1, NR4A2, COL3A1, MAFB, EFNA2, CDK5, LH…	817	869	20369	1.75008	0.17551	0.00350885	0.00341196
GOTERM_BP_FAT	GO:0048666~neuron development	Neuron Development	69	7.33262	3.06704e-05	DDR1, CDKN1C, GABRB1, GLI3, SAMD14, EDNRA, UCHL1, TUBB3, GNAT1, EPHB2, NEFH, EPHB1, SEMA6C, CRPPA, UNC5B, MMP2, EN1, GFRA1, NGF, TUG1, CIT, RP1, IMPACT, GPRIN1, CDH11, MAP1A, TBC1D24, ULK2, GAS1, EVL, HAP1, NPTXR, HDGFL3, LAMA5, BECN1, GPM6A, SEMA7A, TOMT, ATL1, AMIGO1, PTN, NTN1, LRP8, C3, GBX2, NCKAP1L, DISC1, ATP9A, PLXNA3, NTNG2, FZD3, TGFB2, LAMB2, ATP8B1, LGI4, DCLK2, L1CAM, DCLK1, NR4A2, C…	817	1025	20369	1.67831	0.186654	0.00368921	0.00358734
GOTERM_BP_FAT	GO:0030334~regulation of cell migration	Regulation Of Cell Migration	71	7.54516	3.23717e-05	ECM1, CD40, ARID4B, CX3CL1, AQP1, SPN, EDNRA, HYAL2, MMP28, ZC3H12A, ENPP2, CCN4, CCN3, PLXNC1, EPHB2, PDGFRB, SEMA6C, IGFBP5, IGFBP3, SERPINF1, MMP2, MAGI2, SIRT1, SRCIN1, MMP9, DCN, GREM1, MMP14, MMRN1, CDH11, TBC1D24, CDH13, EVL, ARHGEF2, PLPP3, GPLD1, DDR2, PFN2, FBN2, LAMA5, SEMA7A, SP100, HDAC1, LEF1, PRCP, FBLN1, PTN, WDR62, NTN1, GPNMB, ST3GAL4, NCKAP1L, MPZL1, WNT4, PLXNA3, NTNG2, TGFB2,…	817	1065	20369	1.6621	0.195922	0.00382554	0.00371991
GOTERM_BP_FAT	GO:0035239~tube morphogenesis	Tube Morphogenesis	57	6.05739	3.38318e-05	DDR1, RTL1, ECM1, CLEC14A, GLI3, CX3CL1, LOXL2, EDNRA, EFEMP2, CDH2, ZC3H12A, RSPO3, FLVCR2, CCN3, EPHB2, EPHB1, PDGFRB, UNC5B, MMP2, CTNNBIP1, SOX11, NPNT, SIRT1, GREM1, MMP14, APLNR, CDH13, GPLD1, LAMA5, BECN1, NOTCH4, LEF1, WNK4, PRCP, NTN1, DLL1, ARHGAP22, GBX2, WNT4, TBX1, CCDC134, IRX1, FZD3, TGFB2, STIL, ZFP950, EGR3, FOXF1, FZD6, VEGFC, NR2F2, HSPA12B, TBX3, WARS2, COL3A1, TGFBI, FGFR2	817	797	20369	1.78305	0.203792	0.00392916	0.00382066
GOTERM_BP_FAT	GO:0006468~protein phosphorylation	Protein Phosphorylation	41	4.35707	3.81306e-05	DDR1, SEMA7A, CAB39, WNK4, IQGAP3, SPN, RPS6KA4, NUAK1, EDNRA, FASTK, SNHG20, TRIM24, PRKG2, CLSPN, PIM2, EPHB2, MAP3K6, JAK3, EPHB1, IP6K3, MAP3K5, PDGFRB, MAP4K2, IGFBP3, PLK1, DCLK2, NGF, MAPK15, MAPK12, DCLK1, CD24A, CDK5, CAMK4, COL6A1, CDK10, ULK2, PKN1, SQSTM1, FGFR2, ATR, DDR2	817	507	20369	2.01615	0.226518	0.00435335	0.00423314
GOTERM_BP_FAT	GO:0051241~negative regulation of multicellular organismal process	Negative Regulation Of Multicellular Organismal Process	82	8.71413	4.13374e-05	OTUD5, ECM1, PTPRS, HMGB3, ARID4B, SLC4A2, GLI3, CX3CL1, LOXL2, SPN, RGS4, ADAMTS5, RPS6KA6, C1QTNF1, STAB1, ZC3H12A, CCN4, HOMER3, CCN3, EPHB2, JAK3, ADAMTS7, SEMA6C, PARP3, TRIM62, TRPC6, IGFBP5, SERPINF1, MMP2, SOX11, TNFRSF1B, IL17RD, SIRT1, DCN, CIT, GREM1, SIGIRR, ULK2, EVL, ARHGEF2, FXN, PFN2, HDAC1, LEF1, IL4RA, AKAP8, WNK4, ILDR2, OAS1A, FBLN1, PTN, LTBP3, THBS2, NOL3, NTN1, DLL1, RAI1, …	817	1294	20369	1.57989	0.243047	0.00464081	0.00451267
GOTERM_BP_FAT	GO:0007409~axonogenesis	Axonogenesis	35	3.71945	4.25645e-05	LAMA5, SEMA7A, ATL1, AMIGO1, NTN1, GLI3, UCHL1, EDNRA, GBX2, TUBB3, EPHB2, NEFH, EPHB1, PLXNA3, SEMA6C, NTNG2, FZD3, TGFB2, CRPPA, LAMB2, UNC5B, NGF, L1CAM, DCLK1, NR4A2, EFNA2, CDK5, CDH11, MAP1A, TBCE, ULK2, GAS1, EVL, FGFR2, MEGF9	817	405	20369	2.15457	0.249279	0.00470024	0.00457045
GOTERM_BP_FAT	GO:0031399~regulation of protein modification process	Regulation Of Protein Modification Process	78	8.28905	4.4041e-05	CDKN1C, CD40, TFRC, CX3CL1, SPN, EDNRA, UCHL1, HYAL2, ZC3H12A, ENPP2, EPHB2, MAP3K5, PDGFRB, ARRDC4, MAP4K2, TRPC6, IGFBP3, GFRA1, NGF, MASTL, SIRT1, SRCIN1, MMP9, GFRA2, LIME1, GREM1, IMPACT, FKBP8, TBC1D24, APLNR, ADNP, ARHGEF2, PLPP3, SQSTM1, DDR2, PFN2, SEMA7A, CAB39, WNK4, GPS2, MLLT1, FBLN1, IL6RA, ADCY8, LRP8, IQGAP3, C3, MRNIP, GPNMB, CLSPN, GBP4, STOX1, IP6K2, TBX1, CCDC134, FANCI, ABCA2…	817	1215	20369	1.60054	0.256708	0.00478484	0.00465272
GOTERM_BP_FAT	GO:0031401~positive regulation of protein modification process	Positive Regulation Of Protein Modification Process	55	5.84485	6.18082e-05	CD40, TFRC, CX3CL1, SPN, EDNRA, ZC3H12A, ENPP2, MAP3K5, PDGFRB, ARRDC4, MAP4K2, TRPC6, GFRA1, NGF, MASTL, SIRT1, SRCIN1, MMP9, GREM1, APLNR, ADNP, ARHGEF2, PLPP3, SQSTM1, DDR2, PFN2, SEMA7A, CAB39, WNK4, IL6RA, ADCY8, LRP8, IQGAP3, C3, MRNIP, GPNMB, CLSPN, STOX1, IP6K2, TBX1, FANCI, TGFB2, STIL, FANCM, PLK1, ASPSCR1, VEGFC, IRGM1, MAPK15, CD24A, CDK5, ERCC6, AGRN, OGT, EZH2	817	777	20369	1.76477	0.340552	0.00660857	0.00642609
GOTERM_BP_FAT	GO:0009893~positive regulation of metabolic process	Positive Regulation Of Metabolic Process	198	21.0414	6.29439e-05	TFRC, RPS6KA4, EDNRA, CREB3L3, CREB3L4, ZC3H12A, MYB, HABP4, TRIM24, EPHB2, SOX7, SOX5, ARRDC4, HES6, ENDOG, RSAD2, MED8, SOX11, DXO, DNA2, PLPP3, GPLD1, PFN2, RTEL1, MEAF6, XPA, WNK4, IQGAP3, MNDAL, C3, ZNHIT1, MRNIP, NCKAP1L, SNX5, ABCA2, AFAP1L2, EGR3, FOXF1, FZD7, PLK1, IRGM1, NR2F2, COL1A1, LACC1, GIPC1, HOXD9, SFXN5, HOXD8, EZH2, ATR, CDKN1C, CD40, PTPRN, GLI3, CX3CL1, UCHL1, C1QTNF1, NKRF,…	817	3827	20369	1.2899	0.345578	0.00662484	0.00644191
GOTERM_BP_FAT	GO:0044087~regulation of cellular component biogenesis	Regulation Of Cellular Component Biogenesis	73	7.7577	6.7706e-05	COL16A1, PTPRS, TFRC, IFI213, HJURP, CX3CL1, AQP1, TCHP, ADGRE5, TBC1D30, SH3PXD2B, ENPP2, TRAPPC12, PIEZO1, EPHB2, SYNPO, EPHB1, CEP135, PAQR4, CTNNBIP1, SRCIN1, GREM1, RP1, MMP14, APLNR, EVL, HAP1, ADNP, MNS1, ARHGEF2, NPTXR, PFN2, BECN1, GPM6A, RTEL1, DCTN1, CEP295NL, FLII, AMIGO1, AMIGO2, THBS2, NOL3, NTN1, MNDAL, SPTA1, HAS3, EPS8L1, NCKAP1L, WNT4, IFI208, NTNG2, ABCA2, IFI206, STIL, ATP8B1,…	817	1131	20369	1.60919	0.366239	0.00701642	0.00682268
GOTERM_BP_FAT	GO:0061564~axon development	Axon Development	38	4.03826	6.89716e-05	DDR1, LAMA5, SEMA7A, ATL1, AMIGO1, NTN1, GLI3, UCHL1, EDNRA, GBX2, TUBB3, EPHB2, NEFH, EPHB1, PLXNA3, SEMA6C, NTNG2, FZD3, TGFB2, CRPPA, LAMB2, UNC5B, MMP2, NGF, L1CAM, DCLK1, NR4A2, EFNA2, CDK5, CDH11, MAP1A, TBCE, TBC1D24, ULK2, GAS1, EVL, FGFR2, MEGF9	817	467	20369	2.02868	0.371619	0.00703928	0.00684491
GOTERM_BP_FAT	GO:0048646~anatomical structure formation involved in morphogenesis	Anatomical Structure Formation Involved In Morphogenesis	71	7.54516	7.19494e-05	RTL1, ECM1, CLEC14A, SLC4A2, NCMAP, ACRBP, GLI3, CX3CL1, LOXL2, ADAMTS5, EDNRA, CSRP2, ZC3H12A, RSPO3, FLVCR2, CCN3, EPHB2, SOX7, EPHB1, PDGFRB, UNC5B, MMP2, SOX11, SIRT1, MMP9, GREM1, ALDH1A3, OLFM1, MMP14, TNNT2, COL6A1, APLNR, CDH13, GPLD1, FBN2, BECN1, SMARCD3, HDAC1, FLII, NOTCH4, LEF1, PRCP, DLL1, LRP8, TTN, ARHGAP22, GBX2, WNT4, PLXNA3, TBX1, CCDC134, IRX1, ABCA2, FZD3, TGFB2, STIL, EGR3, …	817	1095	20369	1.61656	0.384099	0.0072336	0.00703386
GOTERM_BP_FAT	GO:0048705~skeletal system morphogenesis	Skeletal System Morphogenesis	26	2.76302	7.77568e-05	FBN2, LAMA5, COL13A1, LTBP3, GLI3, RECQL4, HYAL2, SH3PXD2B, SERPINH1, SOX5, TBX1, PDGFRB, TGFB2, ZFP950, MMP2, SOX11, COL1A1, PEX7, 2610005L07RIK, COL3A1, MMP14, GAS1, HOXD9, HOXD8, FGFR2, HOXB6	817	267	20369	2.42778	0.407728	0.00770249	0.00748981
GOTERM_BP_FAT	GO:0060284~regulation of cell development	Regulation Of Cell Development	66	7.01382	8.43637e-05	PTPRS, HMGB3, SLC4A2, GLI3, CX3CL1, CD1D1, MYB, ZC3H12A, ENPP2, PLXNC1, EPHB2, JAK3, SEMA6C, HES6, TRPC6, SERPINF1, CTNNBIP1, SOX11, NGF, TNFRSF1B, CIT, MMP14, FANCD2, RBP1, TBC1D24, ULK2, HAP1, ADNP, ARHGEF2, OBSL1, FXN, SEMA7A, SMARCD3, MEAF6, HDAC1, AMIGO1, LEF1, SRRT, IL4RA, PTN, WDR62, NTN1, DLL1, LRP8, E2F1, S1PR3, NCKAP1L, DISC1, PLXNA3, FZD3, EGR3, BRPF3, FANCA, VEGFC, IRGM1, ISG15, L1CAM…	817	1000	20369	1.64548	0.433511	0.00810784	0.00788396
GOTERM_BP_FAT	GO:0003002~regionalization	Regionalization	36	3.82572	8.542e-05	LAMA5, SMARCD3, TSHZ1, LEF1, DLL1, GLI3, TTN, C3, EDNRA, GBX2, HOXC5, RTTN, HOXA6, TBX1, OFD1, IRX1, NEK8, HES6, STIL, FOXF1, CTNNBIP1, EN1, PPP2R3A, NR2F2, TBX3, GREM1, HEYL, MAFB, FKBP8, APLNR, GAS1, MNS1, HOXD9, HOXD8, FGFR2, HOXB6	817	437	20369	2.05385	0.437528	0.00810784	0.00788396
GOTERM_BP_FAT	GO:0048812~neuron projection morphogenesis	Neuron Projection Morphogenesis	43	4.56961	8.73555e-05	DDR1, LAMA5, GPM6A, SEMA7A, ATL1, AMIGO1, PTN, LRP8, NTN1, GLI3, UCHL1, EDNRA, GBX2, TUBB3, NCKAP1L, EPHB2, NEFH, EPHB1, ATP9A, PLXNA3, SEMA6C, NTNG2, FZD3, TGFB2, CRPPA, LAMB2, UNC5B, NGF, L1CAM, DCLK1, NR4A2, IMPACT, EFNA2, CDK5, CDH11, MAP1A, TBCE, ULK2, GAS1, EVL, PLXNB1, FGFR2, MEGF9	817	563	20369	1.90418	0.444814	0.00810784	0.00788396
GOTERM_BP_FAT	GO:0035456~response to interferon-beta	Response To Interferon-Beta	13	1.38151	8.77819e-05	IFI208, GBP6, TGTP2, IFI206, IFI213, IRGM1, OAS1A, IFI47, IFIT1, IFIT3, IIGP1, MNDAL, XAF1	817	81	20369	4.00134	0.446406	0.00810784	0.00788396
GOTERM_BP_FAT	GO:0008285~negative regulation of cell population proliferation	Negative Regulation Of Cell Population Proliferation	54	5.73858	8.7867e-05	DDR1, CDKN1C, BTG1, NRK, SLC4A2, GLI3, IFIT3, SPN, EFEMP2, TRIM24, CCN3, PIM2, SOX7, EPHB1, KLF11, PTGIR, IGFBP5, IGFBP3, SERPINF1, CTNNBIP1, MAGI2, SOX11, CBFA2T3, MMP9, GREM1, CDH13, GAS1, PDE9A, GPLD1, BECN1, DPT, FBLN1, PTN, DLL1, GPNMB, NACC2, E2F1, BCHE, TGFB2, CDKN2C, TNFRSF9, VEGFC, IRGM1, DHCR24, NR2F2, TBX3, DLK1, CD24A, H19, IFIT3B, PLXNB1, PKN1, FGFR2, GSDME	817	768	20369	1.75299	0.446724	0.00810784	0.00788396
GOTERM_BP_FAT	GO:2000145~regulation of cell motility	Regulation Of Cell Motility	72	7.65143	0.000108092	ECM1, CD40, ARID4B, CX3CL1, AQP1, SPN, EDNRA, HYAL2, MMP28, ZC3H12A, ENPP2, CCN4, CCN3, PLXNC1, EPHB2, PDGFRB, SEMA6C, IGFBP5, IGFBP3, SERPINF1, MMP2, MAGI2, SIRT1, SRCIN1, MMP9, DCN, GREM1, MMP14, MMRN1, CDH11, TBC1D24, CDH13, EVL, ARHGEF2, PLPP3, GPLD1, DDR2, PFN2, FBN2, LAMA5, SEMA7A, SP100, HDAC1, LEF1, PRCP, FBLN1, PTN, WDR62, NTN1, GPNMB, ST3GAL4, NCKAP1L, MPZL1, WNT4, PLXNA3, NTNG2, TGFB2,…	817	1129	20369	1.58996	0.517196	0.00983927	0.00956758
GOTERM_BP_FAT	GO:0120039~plasma membrane bounded cell projection morphogenesis	Plasma Membrane Bounded Cell Projection Morphogenesis	43	4.56961	0.000111848	DDR1, LAMA5, GPM6A, SEMA7A, ATL1, AMIGO1, PTN, LRP8, NTN1, GLI3, UCHL1, EDNRA, GBX2, TUBB3, NCKAP1L, EPHB2, NEFH, EPHB1, ATP9A, PLXNA3, SEMA6C, NTNG2, FZD3, TGFB2, CRPPA, LAMB2, UNC5B, NGF, L1CAM, DCLK1, NR4A2, IMPACT, EFNA2, CDK5, CDH11, MAP1A, TBCE, ULK2, GAS1, EVL, PLXNB1, FGFR2, MEGF9	817	569	20369	1.8841	0.52926	0.0100454	0.00976805
GOTERM_BP_FAT	GO:0035458~cellular response to interferon-beta	Cellular Response To Interferon-Beta	12	1.27524	0.000113526	IFI208, GBP6, TGTP2, IFI206, IFI213, IRGM1, OAS1A, IFI47, IFIT1, IFIT3, IIGP1, MNDAL	817	71	20369	4.21377	0.53455	0.0100619	0.00978411
GOTERM_BP_FAT	GO:0043392~negative regulation of DNA binding	Negative Regulation Of Dna Binding	10	1.0627	0.000123646	IFI208, IFI206, SP100, IFI213, LEF1, CTNNBIP1, E2F1, HABP4, SOX11, MNDAL	817	49	20369	5.08805	0.565227	0.0108166	0.0105179
GOTERM_BP_FAT	GO:0042542~response to hydrogen peroxide	Response To Hydrogen Peroxide	16	1.70032	0.000132405	PDGFRB, BECN1, NQO1, TRPC6, MMP2, BNIP3, ABCC9, SIRT1, AQP1, COL1A1, EDNRA, MYB, TXNIP, FXN, EZH2, MAP3K5	817	124	20369	3.21696	0.590139	0.0114343	0.0111186
GOTERM_BP_FAT	GO:0048584~positive regulation of response to stimulus	Positive Regulation Of Response To Stimulus	136	14.4527	0.000134731	OTUD5, JRK, TFRC, IFI213, NRK, RTKN2, YEATS4, PLAT, RGS4, FADS2, EDNRA, CDH2, ZC3H12A, CCN4, CCN3, PIM2, EPHB2, MAP3K5, PDGFRB, RSAD2, IGFBP5, UNC5B, IGFBP3, GLCE, SOX11, PRPF4B, KNL1, NPNT, PSPC1, TBC1D24, FKBP8, ADNP, PLPP3, H2-D1, GPLD1, GRIA1, SEMA7A, MEAF6, IL4RA, LY96, IQGAP3, MNDAL, C3, ZNHIT1, MRNIP, NACC2, ST3GAL4, NCKAP1L, IGFBP6, SNX5, WNT4, CCDC134, BTNL9, TGFB2, AFAP1L2, HELQ, FZD7, …	817	2490	20369	1.36172	0.596513	0.011488	0.0111708
GOTERM_BP_FAT	GO:0051726~regulation of cell cycle	Regulation Of Cell Cycle	71	7.54516	0.00013773	CDKN1C, UBXN2B, CCNF, YEATS4, CHTF18, EME2, KNTC1, PIM2, PDGFRB, KLF11, CNTD1, PARP3, RMI2, CEP131, KIF23, PRPF4B, KNL1, MASTL, SIRT1, KNSTRN, MLF1, CIT, FANCD2, GAS1, ANAPC5, GNB1L, KIF20A, DNA2, OBSL1, DDR2, BECN1, SMARCD3, CDCA2, MEAF6, DCTN1, CEP295NL, CTBP1, LEF1, WDR62, PKMYT1, RECQL4, ZNHIT1, MRNIP, GPNMB, E2F1, CLSPN, STOX1, WNT4, TBX1, FZD3, TGFB2, AFAP1L2, STIL, CDKN2C, RRM2, PLK1, MIIP…	817	1118	20369	1.5833	0.604582	0.0115817	0.0112619
GOTERM_BP_FAT	GO:0040012~regulation of locomotion	Regulation Of Locomotion	74	7.86397	0.000139269	ECM1, CD40, ARID4B, CX3CL1, AQP1, SPN, EDNRA, HYAL2, MMP28, ZC3H12A, ENPP2, CCN4, CCN3, PLXNC1, EPHB2, PDGFRB, SEMA6C, IGFBP5, IGFBP3, SERPINF1, MMP2, MAGI2, SIRT1, SRCIN1, MMP9, DCN, GREM1, MMP14, MMRN1, CDH11, TBC1D24, CDH13, EVL, ARHGEF2, PLPP3, GPLD1, DDR2, PFN2, FBN2, GRIA1, LAMA5, SEMA7A, SP100, HDAC1, LEF1, PRCP, FBLN1, PTN, WDR62, NTN1, GPNMB, ST3GAL4, NCKAP1L, MPZL1, WNT4, PLXNA3, NTNG2,…	817	1178	20369	1.56615	0.608661	0.0115817	0.0112619
GOTERM_BP_FAT	GO:0048468~cell development	Cell Development	149	15.8342	0.000155775	OTUD5, TFRC, IFI213, RTKN2, ARID4B, SLC4A2, ACRBP, NCMAP, SAMD14, EDNRA, EFEMP2, CDH2, TUBB3, MYB, CCN4, GNAT1, EPHB2, EPHB1, HERC6, PDGFRB, SEMA6C, RSAD2, PAQR5, UNC5B, MAGI2, CEP131, SOX11, TUG1, MARF1, MAF, NUP210L, GPRIN1, MAP1A, PSME4, TMEM79, TBC1D24, ULK2, ALPK3, XIST, NPTXR, HDGFL3, GPM6A, SEMA7A, ARHGEF26, PDE1B, TOMT, FLII, NOTCH4, IL4RA, MNDAL, SPTA1, C3, SERPINH1, NCKAP1L, WNT4, PLXNA…	817	2786	20369	1.33338	0.649846	0.0127964	0.012443
GOTERM_BP_FAT	GO:0048858~cell projection morphogenesis	Cell Projection Morphogenesis	43	4.56961	0.000167345	DDR1, LAMA5, GPM6A, SEMA7A, ATL1, AMIGO1, PTN, LRP8, NTN1, GLI3, UCHL1, EDNRA, GBX2, TUBB3, NCKAP1L, EPHB2, NEFH, EPHB1, ATP9A, PLXNA3, SEMA6C, NTNG2, FZD3, TGFB2, CRPPA, LAMB2, UNC5B, NGF, L1CAM, DCLK1, NR4A2, IMPACT, EFNA2, CDK5, CDH11, MAP1A, TBCE, ULK2, GAS1, EVL, PLXNB1, FGFR2, MEGF9	817	580	20369	1.84837	0.676103	0.0135812	0.0132061
GOTERM_BP_FAT	GO:0051347~positive regulation of transferase activity	Positive Regulation Of Transferase Activity	30	3.1881	0.000175581	CD40, CAB39, DSCC1, WNK4, CHTF18, ADCY8, LRP8, MRNIP, CLSPN, STOX1, IP6K2, MAP3K5, RFC5, PDGFRB, ARRDC4, MAP4K2, STIL, TGFB2, PLK1, VEGFC, IRGM1, MASTL, SRCIN1, SIRT1, GREM1, CD24A, CDK5, AGRN, DDR2, EZH2	817	348	20369	2.14926	0.693585	0.0140799	0.0136911
GOTERM_BP_FAT	GO:0006281~DNA repair	Dna Repair	39	4.14453	0.000193539	RNASEH2C, RTEL1, ANKLE1, MCM7, MCM8, MCM9, XPA, CGAS, RECQL4, ENDOV, MRNIP, EME2, CLSPN, FANCI, XNDC1, RFC5, POLQ, WDHD1, PARP3, RMI2, HELQ, FANCM, FANCL, PLK1, FANCA, CHD1L, MLH1, SIRT1, EMSY, MMS22L, NEIL3, MARF1, EID3, FANCD2, POLE2, PSME4, DNA2, ERCC6, ATR	817	510	20369	1.90652	0.728503	0.0153374	0.0149139
GOTERM_BP_FAT	GO:0051246~regulation of protein metabolic process	Regulation Of Protein Metabolic Process	114	12.1148	0.000209075	TFRC, PLAT, LDLRAD3, CASC3, ZDHHC2, EDNRA, ZC3H12A, LIPG, ENPP2, HABP4, EPHB2, MAP3K5, ARRDC4, PDGFRB, DGAT2, IGFBP5, IFRD2, IGFBP3, SRCIN1, OLFM1, MAP1A, TBC1D24, FKBP8, APLNR, PKP1, FETUB, ADNP, PLPP3, SQSTM1, GPLD1, PFN2, SEMA7A, NOTCH4, WNK4, FBLN1, IQGAP3, RCC1L, C3, MRNIP, CLSPN, IP6K2, MCTS1, CCDC134, FANCI, ABCA2, TRAP1, TGFB2, TIA1, STIL, FANCM, PLK1, ASPSCR1, IRGM1, ABCA7, ISG15, NR2F2,…	817	2037	20369	1.39528	0.755485	0.0163759	0.0159237
GOTERM_BP_FAT	GO:0009892~negative regulation of metabolic process	Negative Regulation Of Metabolic Process	167	17.7471	0.000244265	N6AMT1, OTUD5, SLC27A1, ANKLE1, IFI213, ARID4B, PLAT, CASC3, LOXL2, ZC3H12A, H2AC10, MYB, TRIM24, HABP4, HOMER3, EPHB2, SOX7, SOX5, WDHD1, HES6, ZFP973, DGAT2, IGFBP5, METTL1, SERPINF1, IFRD2, IGFBP3, CTNNBIP1, SOX11, SRCIN1, SIGIRR, OLFM1, MAF, PSPC1, MAP1A, TBC1D24, FKBP8, APLNR, TXNIP, PKP1, FETUB, DXO, ADNP, XIST, PLPP3, SQSTM1, GPLD1, ZFP469, RTEL1, ZBTB8A, CTBP1, NOTCH4, GLIS3, WNK4, FBLN1,…	817	3215	20369	1.29504	0.807098	0.0189123	0.0183901
GOTERM_BP_FAT	GO:0001558~regulation of cell growth	Regulation Of Cell Growth	36	3.82572	0.000250432	DDR1, N6AMT1, SEMA7A, PTPRS, MEAF6, RRAD, NTN1, MNDAL, TCHP, RGS4, HYAL2, CCN4, CCN3, TAF9B, DISC1, IP6K2, PLXNA3, SEMA6C, TGFB2, CDKN2C, IGFBP5, IGFBP3, NGF, L1CAM, SIRT1, CIT, GREM1, ST7L, OLFM1, MMP14, CDK5, CAPRIN2, ULK2, GAS1, ADNP, FXN	817	462	20369	1.94271	0.814948	0.0190819	0.018555
GOTERM_BP_FAT	GO:0016310~phosphorylation	Phosphorylation	41	4.35707	0.000252822	DDR1, SEMA7A, CAB39, WNK4, IQGAP3, SPN, RPS6KA4, NUAK1, EDNRA, FASTK, SNHG20, TRIM24, PRKG2, CLSPN, PIM2, EPHB2, MAP3K6, JAK3, EPHB1, IP6K3, MAP3K5, PDGFRB, MAP4K2, IGFBP3, PLK1, DCLK2, NGF, MAPK15, MAPK12, DCLK1, CD24A, CDK5, CAMK4, COL6A1, CDK10, ULK2, PKN1, SQSTM1, FGFR2, ATR, DDR2	817	554	20369	1.84511	0.817904	0.0190819	0.018555
GOTERM_BP_FAT	GO:0000280~nuclear division	Nuclear Division	29	3.08183	0.000254955	BECN1, ANKLE1, AKAP8, TEX19.1, CHTF18, KIF15, EME2, KNTC1, WNT4, CNTD1, FANCM, PLK1, FANCA, KIF23, MND1, KNL1, MLH1, MASTL, KNSTRN, NDC80, CIT, KIF4, SGO1, MARF1, KIF18B, ESPL1, FANCD2, NCAPD2, FGFR2	817	339	20369	2.13278	0.820502	0.0190819	0.018555
GOTERM_BP_FAT	GO:0006974~DNA damage response	Dna Damage Response	54	5.73858	0.000276423	ANKLE1, MCM7, MCM8, MCM9, CGAS, ENDOV, RPS6KA6, EME2, ZC3H12A, XNDC1, RFC5, WDHD1, PARP3, RMI2, ENDOG, SHISA5, KNL1, CHD1L, MASTL, TNFRSF1B, SIRT1, EMSY, MMS22L, NEIL3, MARF1, EID3, FANCD2, PSME4, GNB1L, DNA2, RNASEH2C, SP100, RTEL1, XPA, RECQL4, NUAK1, BCLAF1, MRNIP, E2F1, CLSPN, MCTS1, FANCI, POLQ, HELQ, FANCM, FANCL, PLK1, FANCA, MLH1, MAPK15, CDK5, POLE2, ERCC6, ATR	817	805	20369	1.67242	0.844676	0.0204614	0.0198964
GOTERM_BP_FAT	GO:0045926~negative regulation of growth	Negative Regulation Of Growth	24	2.55048	0.000287036	SEMA6C, TGFB2, CDKN2C, PTPRS, IGFBP5, RRAD, NTN1, CIT, MNDAL, TCHP, ST7L, GREM1, RGS4, H19, RAI1, CDK5, HYAL2, CAPRIN2, ULK2, GAS1, CCN3, FXN, IP6K2, PLXNA3	817	257	20369	2.32823	0.855395	0.0208125	0.0202378
GOTERM_BP_FAT	GO:0035556~intracellular signal transduction	Intracellular Signal Transduction	101	10.7333	0.000287346	TFRC, 2810408A11RIK, IFI213, AQP1, RPS6KA4, SAMD14, EDNRA, RPS6KA6, EME2, KNTC1, MAP3K6, STK32C, MAP3K5, PDGFRB, IGFBP5, IGFBP3, MAGI2, SHISA5, KNL1, FANCD2, ADNP, DNA2, PDE9A, GRIA1, SHC2, SHC3, PDE1B, XPA, WNK4, IQGAP3, MNDAL, RHOT2, MRNIP, NCKAP1L, CLSPN, PAG1, STIL, PLK1, IRGM1, DCLK2, DHCR24, NR2F2, ARHGAP27, L1CAM, CP, DCLK1, NDC80, NR4A2, LACC1, RGL2, FGFR2, ATR, DOCK6, CD40, CGAS, PPP3CC,…	817	1774	20369	1.41943	0.855697	0.0208125	0.0202378
GOTERM_BP_FAT	GO:0050770~regulation of axonogenesis	Regulation Of Axonogenesis	19	2.01913	0.00029727	SEMA6C, SEMA7A, PTPRS, AMIGO1, NGF, L1CAM, NTN1, CIT, GRIN1, CDH2, CDK5, ULK2, PLXNB1, ADNP, PLXNC1, EPHB2, DISC1, FXN, PLXNA3	817	178	20369	2.66122	0.865031	0.0213023	0.020714
GOTERM_BP_FAT	GO:0045786~negative regulation of cell cycle	Negative Regulation Of Cell Cycle	31	3.29437	0.000311257	CDKN1C, CCNF, PKMYT1, CHTF18, RECQL4, ZNHIT1, MRNIP, GPNMB, EME2, E2F1, KNTC1, CLSPN, FZD3, STIL, CDKN2C, PLK1, MIIP, NR2F2, KNL1, SIRT1, MAPK12, NDC80, CDK5, FANCD2, GAS1, GNB1L, DNA2, ERCC6, FGFR2, ATR, EZH2	817	378	20369	2.04464	0.87717	0.0220698	0.0214604
GOTERM_BP_FAT	GO:0022603~regulation of anatomical structure morphogenesis	Regulation Of Anatomical Structure Morphogenesis	62	6.58874	0.000332586	ECM1, CD40, BTG1, PTPRS, TFRC, CX3CL1, AQP1, EDNRA, CDH2, STAB1, ZC3H12A, ENPP2, PLXNC1, EPHB2, SEMA6C, TRPC6, SERPINF1, NGF, SIRT1, SRCIN1, MMP9, DCN, CIT, GREM1, TBC1D24, APLNR, ULK2, ADNP, OBSL1, FXN, SEMA7A, SP100, AMIGO1, NOTCH4, PTN, THBS2, NTN1, DLL1, LRP8, SPTA1, C3, DISC1, STOX1, WNT4, PLXNA3, TBX1, NTNG2, TGFB2, BNIP3, ATP2B4, VEGFC, IRGM1, L1CAM, WARS2, DHODH, GRIN1, FMNL1, CDK5, CAPRI…	817	970	20369	1.59356	0.893613	0.0233365	0.0226921
GOTERM_BP_FAT	GO:0072359~circulatory system development	Circulatory System Development	68	7.22635	0.000353477	RTL1, ECM1, CLEC14A, GLI3, CX3CL1, LOXL2, AQP1, ADAMTS5, EDNRA, EFEMP2, CDH2, SGCB, ZC3H12A, SH3PXD2B, RSPO3, FLVCR2, CCN3, EPHB2, BORCS8, EPHB1, PDGFRB, UNC5B, MMP2, SOX11, ABCC9, TNFRSF1B, SIRT1, MMP9, GREM1, OLFM1, MMP14, TNNT2, COL6A1, APLNR, CDH13, ALPK3, PLPP3, GPLD1, BECN1, SMARCD3, DLX3, NOTCH4, LEF1, PRCP, DLL1, TTN, ARHGAP22, C3, GBX2, PDLIM7, TBX1, CCDC134, NEK8, TGFB2, STIL, ZFP950, E…	817	1095	20369	1.54825	0.907583	0.024406	0.0237321

## Sheet: S6. SVR David Down
Supplemental Table S6. Gene ontology analysis of enoxacin downregulated genes in SVR cells. DAVID gene ontology of downregulated genes in cells treated with enx compared to DMSO with FDR<0.05 and log2 fold change <-0.5 (1991 genes).
Category	Term	Clean Term	Count	%	PValue	Genes	List Total	Pop Hits	Pop Total	Fold Enrichment	Bonferroni	Benjamini	FDR
GOTERM_BP_FAT	GO:0098542~defense response to other organism	Defense Response To Other Organism	228	11.7951	2.97913e-36	IFITM3, GM13278, GM13275, GM13276, PRF1, UBE2L6, IFI35, IFIT1, IFIT3, GM12185, AQP1, IFIT2, TBK1, DHX58, TRIM25, TRIM26, SKP2, PGLYRP1, B2M, TRIM21, HERC6, FBXO9, GBP6, GBP5, GBP8, DAXX, GBP7, RSAD2, GBP9, SP110, SLC11A1, ACOD1, RNASE1, GM13283, ARMC5, IGTP, TRIM14, ALPK1, CFH, DHX9, ENDOD1, ZBTB1, MNDAL, C2, PLAC8, C3, RNF213, PRDX1, CD14, N4BP3, N4BP1, HEXIM1, TREX1, IRGM2, IRGM1, EIF2AK2, IFI4…	1637	1198	20369	2.36809	2.54359e-32	2.54359e-32	2.40535e-32
GOTERM_BP_FAT	GO:0009615~response to virus	Response To Virus	119	6.15623	1.08552e-35	IFITM3, GM13278, GM13275, GM13276, IFI213, PRF1, IFIT1, IFIT3, IFIT2, PYCARD, TBK1, ZC3H12A, STMN1, DHX58, TRIM25, TRIM26, LGALS9, SKP2, TRIM21, ZBP1, GBP5, GBP7, TGTP1, RSAD2, ACOD1, IFIT1BL1, IFIT1BL2, GM13283, ARMC5, IGTP, IFNAR1, TRIM34A, TRIM12C, DDX60, MNDAL, FV1, TREX1, IRGM2, IFI44, IRGM1, EIF2AK2, ISG15, NMI, GM12250, ISG20, BST2, MOV10, CXCL10, IL6, TNFSF4, BCL3, LCN2, IFI27L2A, MYD88, …	1637	414	20369	3.57658	9.26817e-32	4.63408e-32	4.38224e-32
GOTERM_BP_FAT	GO:0006950~response to stress	Response To Stress	503	26.0217	1.47578e-34	ANKLE1, TFRC, ALKBH7, BACH1, ELK3, CRHBP, TBK1, 1810014B01RIK, SCN11A, ZC3H12A, CREB3L2, MIR22HG, CYP1B1, PGLYRP1, IER5, IER3, GBP6, GBP5, WDHD1, GBP8, DAXX, MEF2C, GBP7, GBP9, ATG10, RNASE1, WDR76, EID3, ARMC5, IGTP, TXNIP, ATF3, RNF121, LXN, CFH, XPA, PDGFB, ENDOD1, C2, PLAC8, C3, PRDX4, HSPH1, RNF213, PRDX1, SFN, HAO1, PPARGC1A, ABCA1, MCTS1, HEXIM1, JUN, MCAM, EIF2AK2, CDC7, NFATC4, FOSL2, DH…	1637	3816	20369	1.64014	1.26002e-30	3.20248e-31	3.02844e-31
GOTERM_BP_FAT	GO:0006952~defense response	Defense Response	277	14.3301	1.50034e-34	IFITM3, GM13278, GM13275, GM13276, TFRC, PRF1, UBE2L6, IFI35, IFIT1, IFIT3, GM12185, AQP1, IFIT2, RPS6KA4, CRHBP, TBK1, SCN11A, ZC3H12A, DHX58, TRIM25, TRIM26, SKP2, PGLYRP1, B2M, TRIM21, HERC6, FBXO9, GBP6, GBP5, GBP8, DAXX, GBP7, RSAD2, GBP9, SP110, SLC11A1, ACOD1, RNASE1, GM13283, ARMC5, IGTP, TRIM14, ALPK1, KCTD16, LXN, CFH, DHX9, ENDOD1, ZBTB1, MNDAL, C2, PLAC8, C3, RNF213, PRDX1, TSPAN2, CD…	1637	1644	20369	2.09652	1.28099e-30	3.20248e-31	3.02844e-31
GOTERM_BP_FAT	GO:0045087~innate immune response	Innate Immune Response	178	9.20848	2.18707e-33	IFITM3, GM13275, GM13276, CSF1, RNF19B, UBE2L6, PRDM1, IFI35, IFIT1, GIMAP6, IFIT3, GM12185, IFIT2, PYCARD, TBK1, DHX58, PIM1, TRIM25, TRIM26, SKP2, PGLYRP1, TRIM21, B2M, HERC6, FBXO9, ZBP1, GBP6, GBP5, GBP8, DAXX, TGTP2, GBP7, TGTP1, SLC15A2, RSAD2, GBP9, SP110, SLC11A1, ARID5A, ACOD1, MPEG1, GM13283, F830016B08RIK, CLEC4D, PSPC1, IGTP, TRIM14, ALPK1, S100A9, S100A8, IFNAR1, TRIM34A, LY6E, TRIM1…	1637	851	20369	2.60262	1.86732e-29	3.73464e-30	3.53168e-30
GOTERM_BP_FAT	GO:0009607~response to biotic stimulus	Response To Biotic Stimulus	293	15.1578	9.36632e-33	IFITM3, CDA, GM13278, GM13275, GM13276, PRF1, UBE2L6, IFI35, IFIT1, IFIT3, GM12185, AQP1, IFIT2, TBK1, EDNRB, ZC3H12A, STMN1, DHX58, TRIM25, TRIM26, LGALS9, SKP2, PGLYRP1, B2M, TRIM21, IER3, HERC6, FBXO9, GBP6, GBP5, GBP8, DAXX, MEF2C, GBP7, RSAD2, GBP9, SP110, SLC11A1, ATG10, ACOD1, RNASE1, GM13283, ARMC5, IGTP, TXNIP, TRIM14, ALPK1, TRIB1, CFH, DHX9, ENDOD1, ZBTB1, MGST1, MNDAL, C2, PLAC8, C3, …	1637	1826	20369	1.99659	7.99696e-29	1.33283e-29	1.26039e-29
GOTERM_BP_FAT	GO:0043207~response to external biotic stimulus	Response To External Biotic Stimulus	288	14.8991	1.25551e-32	IFITM3, CDA, GM13278, GM13275, GM13276, PRF1, UBE2L6, IFI35, IFIT1, IFIT3, GM12185, AQP1, IFIT2, TBK1, EDNRB, ZC3H12A, STMN1, DHX58, TRIM25, TRIM26, LGALS9, SKP2, PGLYRP1, B2M, TRIM21, IER3, HERC6, FBXO9, GBP6, GBP5, GBP8, DAXX, MEF2C, GBP7, RSAD2, GBP9, SP110, SLC11A1, ACOD1, RNASE1, GM13283, ARMC5, IGTP, TRIM14, ALPK1, TRIB1, CFH, DHX9, ENDOD1, ZBTB1, MGST1, MNDAL, C2, PLAC8, C3, RNF213, PRDX1,…	1637	1784	20369	2.00872	1.07196e-28	1.53136e-29	1.44814e-29
GOTERM_BP_FAT	GO:0051707~response to other organism	Response To Other Organism	287	14.8474	2.06285e-32	IFITM3, GM13278, GM13275, GM13276, PRF1, UBE2L6, IFI35, IFIT1, IFIT3, GM12185, AQP1, IFIT2, TBK1, EDNRB, ZC3H12A, STMN1, DHX58, TRIM25, TRIM26, LGALS9, SKP2, PGLYRP1, B2M, TRIM21, IER3, HERC6, FBXO9, GBP6, GBP5, GBP8, DAXX, MEF2C, GBP7, RSAD2, GBP9, SP110, SLC11A1, ACOD1, RNASE1, GM13283, ARMC5, IGTP, TRIM14, ALPK1, TRIB1, CFH, DHX9, ENDOD1, ZBTB1, MGST1, MNDAL, C2, PLAC8, C3, RNF213, PRDX1, CD14…	1637	1780	20369	2.00624	1.76127e-28	2.10992e-29	1.99525e-29
GOTERM_BP_FAT	GO:0051607~defense response to virus	Defense Response To Virus	97	5.01811	2.22409e-32	IFITM3, GM13278, GM13275, GM13276, IFI213, PRF1, IFIT1, IFIT3, IFIT2, PYCARD, TBK1, DHX58, TRIM25, TRIM26, SKP2, TRIM21, ZBP1, GBP5, GBP7, RSAD2, ACOD1, IFIT1BL1, IFIT1BL2, GM13283, ARMC5, IFNAR1, TRIM34A, TRIM12C, DDX60, MNDAL, FV1, TREX1, EIF2AK2, ISG15, GM12250, ISG20, BST2, MOV10, CXCL10, IL6, MYD88, TRIM12A, RTP4, CD40, TRIM30B, TRIM30A, TRIM30D, CGAS, ADAR, IFIH1, TRIM5, OASL1, NCK1, OASL2,…	1637	310	20369	3.89342	1.89892e-28	2.10992e-29	1.99525e-29
GOTERM_BP_FAT	GO:0044419~biological process involved in interspecies interaction between organisms	Biological Process Involved In Interspecies Interaction Between Organisms	297	15.3647	2.28134e-30	IFITM3, GM13278, GM13275, GM13276, PRF1, UBE2L6, IFI35, IFIT1, IFIT3, GM12185, AQP1, IFIT2, TBK1, EDNRB, ZC3H12A, STMN1, DHX58, TRIM25, TRIM26, LGALS9, SKP2, PGLYRP1, B2M, TRIM21, IER3, HERC6, FBXO9, GBP6, GBP5, GBP8, DAXX, MEF2C, GBP7, RSAD2, GBP9, SP110, SLC11A1, ACOD1, RNASE1, GM13283, ARMC5, IGTP, TRIM14, ALPK1, TRIB1, CFH, DHX9, HPN, ENDOD1, ZBTB1, MGST1, MNDAL, C2, PLAC8, C3, RNF213, PRDX1,…	1637	1920	20369	1.92476	1.94781e-26	1.94781e-27	1.84195e-27
GOTERM_BP_FAT	GO:0140546~defense response to symbiont	Defense Response To Symbiont	185	9.57062	4.39905e-30	IFITM3, GM13275, GM13276, NCF1, CSF1, RNF19B, UBE2L6, PRDM1, IFI35, IFIT1, GIMAP6, IFIT3, GM12185, IFIT2, PYCARD, TBK1, DHX58, PIM1, TRIM25, TRIM26, SKP2, PGLYRP1, HMGN2, TRIM21, B2M, HERC6, FBXO9, ZBP1, GBP6, GBP5, GBP8, DAXX, TGTP2, GBP7, TGTP1, SLC15A2, RSAD2, GBP9, SP110, SLC11A1, ARID5A, ACOD1, MPEG1, GM13283, F830016B08RIK, CLEC4D, PSPC1, IGTP, TRIM14, ALPK1, S100A9, S100A8, IFNAR1, TRIM34A…	1637	958	20369	2.40285	3.75591e-26	3.41446e-27	3.2289e-27
GOTERM_BP_FAT	GO:0035456~response to interferon-beta	Response To Interferon-Beta	47	2.43145	1.36517e-29	IFITM3, IFI213, IFI211, OAS1A, OAS1B, IFIT1, IFIT3, GM12185, OAS1G, MNDAL, GM4841, GBP2, IKBKE, 9930111J21RIK2, 9930111J21RIK1, GBP3, IFI208, GBP6, IFI209, TGTP2, GBP2B, IFI206, IFI207, GBP7, TGTP1, IFI204, IFI205, STAT1, TREX1, IFI203, IRGM2, IRGM1, ACOD1, IFI47, IIGP1, GM12250, BST2, F830016B08RIK, STING1, IRF1, IGTP, XAF1, CALM1, CALM2, SHFL, TLR3, IFNAR1	1637	81	20369	7.21994	1.16558e-25	9.71319e-27	9.18532e-27
GOTERM_BP_FAT	GO:0009605~response to external stimulus	Response To External Stimulus	339	17.5375	5.89562e-29	IFITM3, CDA, GM13278, GM13275, GM13276, PRF1, UBE2L6, IFI35, F11R, IFIT1, IFIT3, GM12185, AQP1, IFIT2, TBK1, EDNRB, SCN11A, ZC3H12A, STMN1, DHX58, PIEZO2, HABP4, TRIM25, TRIM26, LGALS9, SKP2, PGLYRP1, B2M, TRIM21, IER3, HERC6, FBXO9, GBP6, GBP5, GBP8, DAXX, MEF2C, GBP7, RSAD2, GBP9, SP110, SLC11A1, ACOD1, RNASE1, GM13283, ARMC5, IGTP, TXNIP, TRIM14, ALPK1, TRIB1, LXN, CFH, DHX9, HPN, PDGFB, ENDOD…	1637	2353	20369	1.79266	5.03368e-25	3.87206e-26	3.66164e-26
GOTERM_BP_FAT	GO:0031347~regulation of defense response	Regulation Of Defense Response	173	8.94982	1.38492e-27	NCF1, IFI213, IFI211, TNC, GIMAP5, IFI35, ETS1, PYCARD, CDH5, LGALS2, EDNRB, TBK1, ZC3H12A, DHX58, ADORA1, PIM1, TRIM25, MAP3K8, SLC39A8, LGALS9, PGLYRP1, TRIM21, IER3, ZBP1, GBP5, MEF2C, GBP7, SLC15A2, RSAD2, TRAFD1, TAP1, ACOD1, FCGR3, RNF125, PSPC1, IGTP, ALPK1, S100A9, S100A8, TRIM12C, CD274, CFH, DHX9, TXK, CHRNA7, LPL, DDX60, AGER, PPL, MNDAL, C3, SOCS3, SBNO2, PDCD10, RNF170, SFN, CD14, SL…	1637	905	20369	2.37858	1.18244e-23	8.44601e-25	7.98701e-25
GOTERM_BP_FAT	GO:0002218~activation of innate immune response	Activation Of Innate Immune Response	69	3.56958	1.93787e-27	TRIM30B, TRIM30A, TRIM30D, IFI213, IFI211, CGAS, HMGB1, PYCARD, IFIH1, TBK1, TRIM5, NFKBIZ, DHX58, TRIM25, LBP, IKBKE, HAVCR2, ZBP1, GBP5, GBP7, TIRAP, RNF144A, SFPQ, PSPC1, OAS3, IRF1, IGTP, IRF7, TLR7, ALPK1, TLR4, TLR3, TLR13, TRIM12C, CD274, NLRP1A, OAS1A, OAS1B, NOD1, NOD2, OAS1G, MNDAL, RNF135, TIFA, RNF170, CD14, GBP2, GBP3, IFI208, HEXIM1, IFI209, GBP2B, IFI206, IFI207, KCNJ8, IFI204, IFI…	1637	190	20369	4.51873	1.65455e-23	1.10303e-24	1.04309e-24
GOTERM_BP_FAT	GO:0002831~regulation of response to biotic stimulus	Regulation Of Response To Biotic Stimulus	135	6.98396	3.23655e-27	NCF1, IFI213, IFI211, GIMAP5, PRDM1, IFI35, PYCARD, TBK1, ZC3H12A, DHX58, PIM1, TRIM25, LGALS9, TRIM21, ZBP1, GBP5, GBP7, SLC15A2, RSAD2, TRAFD1, TAP1, ACOD1, RNF125, PSPC1, IGTP, ALPK1, TRIB1, S100A9, S100A8, TRIM12C, CD274, CFH, DHX9, TXK, DDX60, PPL, MNDAL, RNF170, SFN, CD14, SLC15A4, N4BP1, CCDC134, HEXIM1, CD160, TREX1, IRGM2, IRGM1, EIF2AK2, ISG15, NMI, PARP14, GM12250, NFKBIA, OGT, MYD88, …	1637	618	20369	2.71811	2.76337e-23	1.7271e-24	1.63324e-24
GOTERM_BP_FAT	GO:0035458~cellular response to interferon-beta	Cellular Response To Interferon-Beta	42	2.17279	6.47915e-27	IFI213, IFI211, OAS1A, OAS1B, IFIT1, IFIT3, GM12185, OAS1G, MNDAL, GM4841, GBP2, 9930111J21RIK2, 9930111J21RIK1, GBP3, IFI208, GBP6, IFI209, TGTP2, GBP2B, IFI206, IFI207, GBP7, TGTP1, IFI204, IFI205, STAT1, TREX1, IFI203, IRGM2, IRGM1, ACOD1, IFI47, IIGP1, GM12250, F830016B08RIK, STING1, IRF1, IGTP, CALM1, CALM2, TLR3, IFNAR1	1637	71	20369	7.36058	5.5319e-23	3.25406e-24	3.07722e-24
GOTERM_BP_FAT	GO:0032101~regulation of response to external stimulus	Regulation Of Response To External Stimulus	206	10.657	3.02755e-26	IFI35, LGALS2, TBK1, EDNRB, ZC3H12A, DHX58, TRIM25, LGALS9, PGLYRP1, TRIM21, IER3, GBP5, GBP7, RSAD2, DAPK2, MTUS1, OMG, ACOD1, RNF125, CD109, IGTP, ALPK1, TRIB1, CFH, DHX9, TXK, PDGFB, PPL, MNDAL, C3, TSPAN8, PDCD10, SFN, NCKAP1L, CD14, N4BP1, HEXIM1, TREX1, IRGM2, IRGM1, EIF2AK2, IGF1, NMI, PARP14, BST1, TNFSF4, GPR183, CD28, CD200, GPR18, ROBO3, IFIH1, CASP12, C1QTNF1, TRIM5, MMP28, PBK, CCR7,…	1637	1205	20369	2.12717	2.58492e-22	1.43607e-23	1.35802e-23
GOTERM_BP_FAT	GO:0080134~regulation of response to stress	Regulation Of Response To Stress	240	12.4159	1.75392e-25	IFI35, CRHBP, LGALS2, PNP, TBK1, EDNRB, ZC3H12A, DHX58, TRIM25, LGALS9, SKP2, PGLYRP1, IER5, TRIM21, SOX4, IER3, GBP5, DAXX, MEF2C, GBP7, RSAD2, OMG, ACOD1, WDR76, RNF125, CD109, IGTP, ALPK1, CFH, MEAF6, DHX9, TXK, PDGFB, PPL, MNDAL, C3, ZNHIT1, TSPAN8, PDCD10, PRDX1, FIGNL1, SFN, CD14, N4BP1, HEXIM1, TREX1, IRGM2, IRGM1, EIF2AK2, IGF1, NMI, PARP14, DHFR, BST1, TNFSF4, CD28, CD200, SGF29, IFIH1, …	1637	1522	20369	1.96208	1.4975e-21	7.88158e-23	7.45325e-23
GOTERM_BP_FAT	GO:0045088~regulation of innate immune response	Regulation Of Innate Immune Response	117	6.05277	3.09716e-25	NCF1, IFI213, IFI211, GIMAP5, IFI35, PYCARD, TBK1, DHX58, PIM1, TRIM25, LGALS9, TRIM21, ZBP1, GBP5, GBP7, SLC15A2, RSAD2, TRAFD1, TAP1, ACOD1, RNF125, PSPC1, IGTP, ALPK1, S100A9, S100A8, TRIM12C, CD274, CFH, DHX9, TXK, DDX60, MNDAL, RNF170, SFN, CD14, SLC15A4, N4BP1, CCDC134, HEXIM1, CD160, TREX1, IRGM2, IRGM1, EIF2AK2, ISG15, NMI, PARP14, GM12250, NFKBIA, OGT, MYD88, TRIM12A, H2-T23, TRIM30B, TR…	1637	514	20369	2.83233	2.64435e-21	1.32218e-22	1.25032e-22
GOTERM_BP_FAT	GO:0031349~positive regulation of defense response	Positive Regulation Of Defense Response	112	5.7941	4.9066e-25	IFI213, IFI211, GIMAP5, IFI35, ETS1, PYCARD, LGALS2, TBK1, DHX58, TRIM25, MAP3K8, LGALS9, ZBP1, GBP5, MEF2C, GBP7, RSAD2, ACOD1, FCGR3, PSPC1, IGTP, ALPK1, S100A9, S100A8, TRIM12C, CD274, DHX9, TXK, LPL, DDX60, MNDAL, C3, RNF170, CD14, SLC15A4, CCDC134, HEXIM1, CD160, IRGM2, IRGM1, NMI, GM12250, NFKBIA, IL6, TNFSF4, CD28, MYD88, TRIM12A, H2-T23, TRIM30B, TRIM30A, TRIM30D, HMGB2, CGAS, CXCL1, HMGB…	1637	481	20369	2.8973	4.18925e-21	1.99488e-22	1.88647e-22
GOTERM_BP_FAT	GO:0045089~positive regulation of innate immune response	Positive Regulation Of Innate Immune Response	88	4.55251	1.27117e-23	H2-T23, TRIM30B, TRIM30A, TRIM30D, IFI213, HMGB2, IFI211, CGAS, GIMAP5, HMGB1, IFI35, PYCARD, IFIH1, TBK1, TRIM5, CASP4, NFKBIZ, DHX58, TRIM25, LBP, LGALS9, IKBKE, OASL1, HAVCR2, ZBP1, GBP5, GBP7, RSAD2, PARP9, TIRAP, RNF144A, SFPQ, PSPC1, OAS3, IRF1, IGTP, IRF7, TLR7, ALPK1, TLR4, TLR3, TLR13, TRIM56, TRIM12C, CD274, NLRP1A, DHX9, TXK, NLRC5, OAS1A, OAS1B, NOD1, NOD2, DDX60, OAS1G, MNDAL, RNF135…	1637	334	20369	3.27836	1.08533e-19	4.93331e-21	4.66521e-21
GOTERM_BP_FAT	GO:0032103~positive regulation of response to external stimulus	Positive Regulation Of Response To External Stimulus	129	6.67356	3.20381e-23	CSF1, IFI213, IFI211, PLAT, GIMAP5, IFI35, ETS1, PYCARD, LGALS2, TBK1, DHX58, TRIM25, MAP3K8, LGALS9, ZBP1, GBP5, GBP7, RSAD2, DAPK2, ACOD1, PGF, FCGR3, PSPC1, IGTP, ALPK1, S100A9, S100A8, TRIM12C, CD274, DHX9, TXK, PDGFB, LPL, DDX60, AGER, MNDAL, C3, RNF170, NCKAP1L, CD14, SLC15A4, CCDC134, HEXIM1, CD160, IRGM2, IRGM1, NMI, GM12250, NFKBIA, CXCL10, IL6, CNOT6, TNFSF4, CD28, MYD88, TRIM12A, H2-T2…	1637	632	20369	2.53977	2.73542e-19	1.18931e-20	1.12468e-20
GOTERM_BP_FAT	GO:0002682~regulation of immune system process	Regulation Of Immune System Process	263	13.6058	7.7855e-23	TFRC, SLC4A2, IFI35, PNP, TBK1, ZC3H12A, DHX58, TBC1D10C, TRIM25, LGALS9, PGLYRP1, B2M, TRIM21, EPHB4, SOX4, GBP5, ZFP973, MEF2C, GBP7, RSAD2, SLC11A1, DAPK2, SOX13, MTUS1, ACOD1, MTURN, RNF125, IGTP, ALPK1, TRIB1, H2-D1, CFTR, CFH, MEAF6, SDC4, DHX9, TXK, ZBTB1, PPL, MNDAL, C2, C3, HSPH1, ZNHIT1, APOD, SFN, NCKAP1L, CD14, ICOS, PATZ1, N4BP1, HEXIM1, JUN, TREX1, IRGM2, IRGM1, EIF2AK2, IGF1, NMI, …	1637	1805	20369	1.81301	6.64726e-19	2.76969e-20	2.61917e-20
GOTERM_BP_FAT	GO:0002833~positive regulation of response to biotic stimulus	Positive Regulation Of Response To Biotic Stimulus	91	4.70771	1.97668e-22	H2-T23, TRIM30B, TRIM30A, TRIM30D, IFI213, HMGB2, IFI211, CGAS, CXCL1, GIMAP5, HMGB1, IFI35, PYCARD, IFIH1, TBK1, TRIM5, CASP4, NFKBIZ, DHX58, TRIM25, EMILIN1, LBP, LGALS9, IKBKE, OASL1, HAVCR2, ZBP1, GBP5, GBP7, RSAD2, ACOD1, PARP9, TIRAP, RNF144A, SFPQ, PSPC1, OAS3, IRF1, IGTP, IRF7, TLR7, ALPK1, TLR4, TLR3, TLR13, TRIM56, TRIM12C, CD274, NLRP1A, DHX9, TXK, NLRC5, OAS1A, OAS1B, NOD1, NOD2, DDX6…	1637	367	20369	3.08529	1.68769e-18	6.75077e-20	6.3839e-20
GOTERM_BP_FAT	GO:0002376~immune system process	Immune System Process	356	18.417	1.371e-20	IFITM3, GM13275, GM13276, PRF1, UBE2L6, IFI35, F11R, IFIT1, IFIT3, GM12185, IFIT2, LGALS2, PNP, TBK1, EDNRB, SCN11A, FTH1, ZC3H12A, DHX58, TNFSF10, TBC1D10C, TRIM25, TRIM26, LGALS9, SKP2, PGLYRP1, B2M, TRIM21, SOX4, HERC6, FBXO9, GBP6, GBP5, GBP8, DAXX, MEF2C, GBP7, RSAD2, GBP9, SP110, SLC11A1, DAPK2, SOX13, ACOD1, JMJD6, GM13283, RNF125, ARMC5, PSME1, IGTP, PSME2, TRIM14, ALPK1, HOXB6, H2-D1, CF…	1637	2799	20369	1.58259	1.17056e-16	4.50216e-18	4.25749e-18
GOTERM_BP_FAT	GO:0002684~positive regulation of immune system process	Positive Regulation Of Immune System Process	185	9.57062	2.38436e-20	PLVAP, TFRC, CSF1, IFI213, H2-K1, IFI211, GIMAP5, PRDM1, IFI35, PYCARD, PNP, TBK1, ZC3H12A, DHX58, TRIM25, LGALS9, B2M, EPHB4, SOX4, IL13RA1, ZBP1, GBP5, MEF2C, GBP7, RSAD2, DAPK2, SLC11A1, CTNNBIP1, ARID5A, SOX13, ACOD1, PGF, FCGR3, CLEC4D, PSPC1, IGTP, ALPK1, TRIB1, CFTR, H2-D1, TRIM12C, CD274, CFH, CBFB, DHX9, TXK, ZBTB1, IL4RA, DDX60, AGER, ZFP36L1, C2, MNDAL, C3, RAP1A, HSPH1, RNF170, NCKAP1…	1637	1155	20369	1.99302	2.03577e-16	7.53988e-18	7.13012e-18
GOTERM_BP_FAT	GO:0050776~regulation of immune response	Regulation Of Immune Response	175	9.05329	5.33549e-20	TFRC, NCF1, IFI213, H2-K1, IFI211, GIMAP5, IFI35, PYCARD, PNP, TBK1, ZC3H12A, DHX58, PIM1, TRIM25, LGALS9, PGLYRP1, TRIM21, B2M, ZBP1, GBP5, MEF2C, GBP7, SLC15A2, RSAD2, SLC11A1, ARID5A, TRAFD1, TAP1, ACOD1, FCGR3, CLEC4D, RNF125, PSPC1, IGTP, ALPK1, S100A9, H2-D1, S100A8, TRIM12C, CD274, CFH, DHX9, TXK, ZBTB1, IL4RA, DDX60, AGER, PPL, C2, MNDAL, C3, RAP1A, RNF170, NCKAP1L, SFN, CD14, SLC15A4, N4…	1637	1075	20369	2.02559	4.55544e-16	1.62694e-17	1.53853e-17
GOTERM_BP_FAT	GO:0050778~positive regulation of immune response	Positive Regulation Of Immune Response	134	6.93223	3.24644e-19	TFRC, IFI213, H2-K1, IFI211, GIMAP5, IFI35, PYCARD, PNP, TBK1, ZC3H12A, DHX58, TRIM25, LGALS9, B2M, ZBP1, GBP5, MEF2C, GBP7, RSAD2, SLC11A1, ARID5A, ACOD1, FCGR3, PSPC1, IGTP, ALPK1, H2-D1, TRIM12C, CD274, CFH, DHX9, TXK, ZBTB1, IL4RA, DDX60, C2, MNDAL, C3, RAP1A, RNF170, NCKAP1L, CD14, SLC15A4, CCDC134, BTNL9, HEXIM1, CD160, TREX1, IRGM2, IRGM1, NMI, BMX, GM12250, FOSL2, NFKBIA, IL6, RGCC, TNFSF…	1637	742	20369	2.2471	2.77181e-15	9.55798e-17	9.03855e-17
GOTERM_BP_FAT	GO:0001817~regulation of cytokine production	Regulation Of Cytokine Production	148	7.65649	1.27164e-18	CSF2, IFI213, GIMAP5, F11R, PYCARD, PNP, TBK1, ZC3H12A, DHX58, CYP1B1, HOMER3, LGALS9, PGLYRP1, B2M, ARRDC4, GBP5, ZFP973, GBP7, RSAD2, SLC11A1, ARID5A, ACOD1, FCGR3, RNF125, IGTP, CHIL5, IFNAR1, CD274, DHX9, TXK, CHRNA7, ZBTB1, IL4RA, LPL, AGER, MNDAL, C3, S100A13, APOD, NCKAP1L, CD14, PATZ1, N4BP1, BTNL9, TIA1, CD160, TREX1, IRGM2, IRGM1, EIF2AK2, ISG15, PSG22, INHBB, IGF1, NMI, NFATC4, BST2, C…	1637	872	20369	2.11187	1.08572e-14	3.61908e-16	3.4224e-16
GOTERM_BP_FAT	GO:0002253~activation of immune response	Activation Of Immune Response	88	4.55251	1.56554e-17	TRIM30B, TRIM30A, TRIM30D, IFI213, IFI211, CGAS, HMGB1, PYCARD, IFIH1, TBK1, TRIM5, ZC3H12A, NFKBIZ, DHX58, PDE4B, TRIM25, LBP, IKBKE, HAVCR2, ZBP1, GBP5, MEF2C, GBP7, TIRAP, RNF144A, SFPQ, PSPC1, OAS3, IRF1, IGTP, IRF7, LCP2, TLR7, ALPK1, TLR4, TLR3, TLR13, TRIM12C, CD274, NLRP1A, CFH, TXK, OAS1A, OAS1B, NOD1, NOD2, OAS1G, C2, MNDAL, RNF135, C3, TIFA, RNF170, NCKAP1L, CD14, GBP2, GBP3, BTNL9, IF…	1637	409	20369	2.6772	1.33666e-13	4.31181e-15	4.07748e-15
GOTERM_BP_FAT	GO:0048584~positive regulation of response to stimulus	Positive Regulation Of Response To Stimulus	311	16.089	2.0907e-16	JRK, TFRC, IFI35, F11R, LGALS2, PNP, TBK1, EDNRB, ZC3H12A, DHX58, TNFSF10, CYP1B1, TRIM25, TRIM26, LGALS9, SKP2, IER5, B2M, SOX4, GBP5, DAXX, MEF2C, GBP7, RSAD2, SLC11A1, DAPK2, ARRDC3, ACOD1, MTURN, IGTP, ALPK1, H2-D1, ATF3, CFH, MEAF6, DHX9, TXK, PDGFB, ZBTB1, IQGAP3, MNDAL, C2, C3, ZNHIT1, PDCD10, S100A13, NCKAP1L, CD14, PEA15A, JAG2, HEXIM1, JUN, GADD45B, TREX1, IRGM2, IRGM1, EIF2AK2, IGF1, N…	1637	2490	20369	1.55411	1.89582e-12	5.57824e-14	5.27509e-14
GOTERM_BP_FAT	GO:0006955~immune response	Immune Response	257	13.2954	1.06214e-15	IFITM3, GM13275, GM13276, PRF1, UBE2L6, IFI35, IFIT1, IFIT3, GM12185, IFIT2, PNP, TBK1, SCN11A, FTH1, DHX58, TNFSF10, TRIM25, TRIM26, SKP2, PGLYRP1, B2M, TRIM21, HERC6, FBXO9, GBP6, GBP5, GBP8, DAXX, MEF2C, GBP7, RSAD2, GBP9, SP110, SLC11A1, ACOD1, GM13283, RNF125, IGTP, TRIM14, ALPK1, H2-D1, CFH, DHX9, TXK, ENDOD1, ZBTB1, C2, C3, PRDX1, CD14, N4BP3, N4BP1, TNFSFM13, HEXIM1, TREX1, IRGM2, IFI44, …	1637	1970	20369	1.62326	9.47908e-12	2.74805e-13	2.5987e-13
GOTERM_BP_FAT	GO:1901652~response to peptide	Response To Peptide	180	9.31195	1.87134e-15	IFITM3, GM13275, PLVAP, CSF3, OXTR, GM13276, CSF2, TFRC, CSF1, IFI213, IFI211, WBP1L, IFIT1, GIMAP6, IFIT3, GM12185, IFIT2, PYCARD, RPS6KA4, CRHBP, ZC3H12A, CCRL2, PIM1, CYP1B1, TRIM25, TRIM21, EPHB4, IL13RA1, GBP6, GBP5, GBP8, DAXX, TGTP2, GBP7, TGTP1, GBP9, SLC11A1, ACOD1, GM13283, F830016B08RIK, RNF125, IGTP, SRSF3, SRSF7, IFNAR1, CD274, CFH, PDE1B, DHX9, EBI3, IL4RA, PDGFB, CSF2RB, ZFP36L1, M…	1637	1233	20369	1.81648	1.61144e-11	4.69926e-13	4.44387e-13
GOTERM_BP_FAT	GO:0002753~cytoplasmic pattern recognition receptor signaling pathway	Cytoplasmic Pattern Recognition Receptor Signaling Pathway	33	1.70719	2.09261e-15	NLRP1A, OAS1A, CGAS, NOD1, OAS1B, NOD2, OAS1G, PYCARD, RNF135, IFIH1, TBK1, DHX58, TIFA, RNF170, TRIM25, HAVCR2, KCNJ8, IRGM2, IRGM1, GM15441, NFKBIA, STING1, TNIP2, OAS3, IRF1, IGTP, IRF7, TLR7, ALPK1, TLR4, TLR3, MYD88, TLR13	1637	79	20369	5.19766	1.80103e-11	5.10478e-13	4.82736e-13
GOTERM_BP_FAT	GO:0010556~regulation of macromolecule biosynthetic process	Regulation Of Macromolecule Biosynthetic Process	588	30.419	2.78508e-15	TFRC, HNRNPR, F11R, BACH1, ELK3, TBK1, ZFP160, SOX18, ZC3H12A, CREB3L2, CYP1B1, HOMER3, PGLYRP1, JUNB, IER5, GBP5, HES6, WDHD1, ACOT8, DAXX, MEF2C, GBP7, GM7072, SOX13, MED8, MED6, RFX8, RNF125, DEPDC1A, IGTP, TXNIP, HOXB3, A630089N07RIK, HOXB7, HOXB6, ATF3, ZBTB8A, MEAF6, HPN, XPA, PDGFB, IQGAP3, PLAC8, C3, HSPH1, KCNQ1OT1, S100A13, MOV10L1, NCKAP1L, SFN, PPARGC1A, MCTS1, HEXIM1, JUN, H3F3B, BTB…	1637	5578	20369	1.31166	2.36977e-11	6.60529e-13	6.24632e-13
GOTERM_BP_FAT	GO:0034097~response to cytokine	Response To Cytokine	177	9.15675	4.1366e-15	IFITM3, GM13275, PLVAP, CSF3, OXTR, GM13276, CSF2, TFRC, CSF1, IFI213, IFI211, WBP1L, IFIT1, GIMAP6, IFIT3, GM12185, IFIT2, PYCARD, RPS6KA4, CRHBP, ZC3H12A, CCRL2, PIM1, CYP1B1, TRIM25, TRIM21, EPHB4, IL13RA1, GBP6, GBP5, GBP8, DAXX, TGTP2, GBP7, TGTP1, GBP9, SLC11A1, ACOD1, GM13283, F830016B08RIK, RNF125, IGTP, SRSF3, SRSF7, IFNAR1, CD274, CFH, PDE1B, DHX9, EBI3, IL4RA, PDGFB, CSF2RB, ZFP36L1, M…	1637	1215	20369	1.81267	3.50726e-11	9.33633e-13	8.82895e-13
GOTERM_BP_FAT	GO:0010468~regulation of gene expression	Regulation Of Gene Expression	577	29.85	4.15531e-15	TFRC, HNRNPR, F11R, BACH1, ELK3, TBK1, ZFP160, SOX18, ZC3H12A, CREB3L2, CYP1B1, HOMER3, PGLYRP1, JUNB, IER5, GBP5, HES6, WDHD1, DAXX, MEF2C, GBP7, GM7072, SOX13, MED8, MED6, RFX8, RNF125, DEPDC1A, IGTP, TXNIP, HOXB3, A630089N07RIK, HOXB7, HOXB6, ATF3, ZBTB8A, MEAF6, HPN, XPA, PDGFB, IQGAP3, PLAC8, C3, HSPH1, KCNQ1OT1, S100A13, MOV10L1, NCKAP1L, SFN, PPARGC1A, MCTS1, HEXIM1, JUN, H3F3B, BTBD18, H3…	1637	5460	20369	1.31493	3.50726e-11	9.33633e-13	8.82895e-13
GOTERM_BP_FAT	GO:0050792~regulation of viral process	Regulation Of Viral Process	49	2.53492	1.06508e-14	TOP2A, IFITM3, TRIM30B, TRIM30A, TRIM30D, IFI213, ADAR, HMGB1, IFIH1, TRIM5, TRIM25, TRIM21, OASL1, OASL2, APOBEC3, GBP7, RSAD2, OAS2, OAS3, TRIM14, PPIH, TRIM12C, SP100, DHX9, OAS1A, CXCR4, OAS1B, FURIN, OAS1G, MNDAL, CCL5, N4BP1, IFI208, HEXIM1, IFI209, IFI206, IFI207, CD209C, STAT1, MX2, IFI203, LARP7, EIF2AK2, ISG15, BST2, ISG20, ZNFX1, SHFL, TRIM12A	1637	173	20369	3.52428	9.09992e-11	2.33171e-12	2.205e-12
GOTERM_BP_FAT	GO:0001819~positive regulation of cytokine production	Positive Regulation Of Cytokine Production	100	5.17331	1.21511e-14	CSF2, IFI213, GIMAP5, PYCARD, PNP, TBK1, DHX58, CYP1B1, LGALS9, B2M, ARRDC4, GBP5, RSAD2, SLC11A1, ARID5A, FCGR3, CHIL5, IFNAR1, CD274, DHX9, TXK, IL4RA, LPL, AGER, MNDAL, C3, S100A13, CD14, CD160, EIF2AK2, ISG15, PSG22, NFATC4, CCDC88B, IL6, RGCC, TNFSF4, BCL3, CD28, HPSE, CD200, MYD88, H2-T23, CD40, FLT3, FLT4, HILPDA, HMGB2, CGAS, HMGB1, CLEC9A, SPN, IFIH1, CD1D1, CASP4, PDE4B, CCR7, LBP, IKBK…	1637	548	20369	2.2706	1.03322e-10	2.59365e-12	2.4527e-12
GOTERM_BP_FAT	GO:0001562~response to protozoan	Response To Protozoan	25	1.29333	2.15176e-14	CD40, IL4RA, SPN, GBP2, GBP4, IER3, GBP3, GBP6, BATF2, TGTP2, GBP2B, GBP8, GBP7, TGTP1, GBP9, SLC11A1, IRGM2, IIGP1, GM12250, CCDC88B, IL6, GBP10, BCL3, IGTP, MYD88	1637	48	20369	6.48067	1.83894e-10	4.4809e-12	4.23739e-12
GOTERM_BP_FAT	GO:0048525~negative regulation of viral process	Negative Regulation Of Viral Process	34	1.75892	5.08109e-14	IFITM3, SP100, IFI213, OAS1A, OAS1B, ADAR, OAS1G, MNDAL, IFIH1, CCL5, TRIM21, OASL1, N4BP1, OASL2, IFI208, HEXIM1, IFI209, APOBEC3, IFI206, IFI207, RSAD2, STAT1, MX2, IFI203, LARP7, EIF2AK2, ISG15, ISG20, BST2, ZNFX1, OAS2, OAS3, TRIM14, SHFL	1637	92	20369	4.59846	4.34142e-10	1.03291e-11	9.76778e-12
GOTERM_BP_FAT	GO:1903900~regulation of viral life cycle	Regulation Of Viral Life Cycle	42	2.17279	9.75001e-14	TOP2A, IFITM3, TRIM12C, TRIM30B, TRIM30A, TRIM30D, IFI213, OAS1A, OAS1B, ADAR, FURIN, HMGB1, OAS1G, MNDAL, IFIH1, TRIM5, CCL5, TRIM25, TRIM21, OASL1, N4BP1, OASL2, IFI208, IFI209, APOBEC3, IFI206, IFI207, GBP7, CD209C, RSAD2, MX2, IFI203, EIF2AK2, ISG15, ISG20, BST2, ZNFX1, OAS2, OAS3, PPIH, SHFL, TRIM12A	1637	139	20369	3.75972	8.32264e-10	1.93594e-11	1.83073e-11
GOTERM_BP_FAT	GO:0002221~pattern recognition receptor signaling pathway	Pattern Recognition Receptor Signaling Pathway	41	2.12106	1.25954e-13	CD274, NLRP1A, OAS1A, CGAS, NOD1, OAS1B, NOD2, OAS1G, PYCARD, RNF135, IFIH1, TBK1, NFKBIZ, DHX58, TIFA, RNF170, TRIM25, LBP, CD14, HAVCR2, KCNJ8, IRGM2, IRGM1, NMI, GM15441, TIRAP, NFKBIA, RNF144A, STING1, TNIP1, TNIP2, OAS3, IRF1, IGTP, IRF7, TLR7, ALPK1, TLR4, TLR3, MYD88, TLR13	1637	134	20369	3.80715	1.07493e-09	2.44408e-11	2.31125e-11
GOTERM_BP_FAT	GO:0042832~defense response to protozoan	Defense Response To Protozoan	23	1.18986	1.4206e-13	GBP6, BATF2, TGTP2, GBP2B, GBP8, CD40, GBP7, TGTP1, GBP9, SLC11A1, IRGM2, IL4RA, IIGP1, GM12250, CCDC88B, IL6, GBP10, BCL3, IGTP, GBP2, GBP4, MYD88, GBP3	1637	43	20369	6.6555	1.21332e-09	2.69534e-11	2.54886e-11
GOTERM_BP_FAT	GO:0045071~negative regulation of viral genome replication	Negative Regulation Of Viral Genome Replication	28	1.44853	1.57339e-13	IFITM3, IFI213, OAS1A, OAS1B, ADAR, OAS1G, MNDAL, IFIH1, CCL5, OASL1, N4BP1, OASL2, IFI208, IFI209, APOBEC3, IFI206, IFI207, RSAD2, MX2, IFI203, EIF2AK2, ISG15, ISG20, BST2, ZNFX1, OAS2, OAS3, SHFL	1637	65	20369	5.36001	1.34319e-09	2.92036e-11	2.76165e-11
GOTERM_BP_FAT	GO:0032479~regulation of type I interferon production	Regulation Of Type I Interferon Production	42	2.17279	2.15274e-13	DHX9, FLT3, HMGB2, OAS1A, CGAS, OAS1B, HMGB1, OAS1G, RELB, PYCARD, RNF135, IFIH1, TBK1, DHX58, CD14, IKBKE, GBP4, HAVCR2, ARRDC4, GBP7, STAT1, TREX1, IRGM2, IRGM1, ACOD1, ISG15, NMI, TIRAP, RNF125, STING1, OAS2, OAS3, IRF1, IGTP, IRF7, TLR7, XAF1, TLR4, TLR3, MYD88, IFNAR1, TRIM56	1637	142	20369	3.68029	1.83799e-09	3.91067e-11	3.69814e-11
GOTERM_BP_FAT	GO:0009966~regulation of signal transduction	Regulation Of Signal Transduction	369	19.0895	6.82798e-13	JRK, TFRC, 2810408A11RIK, IFI35, F11R, CRHBP, TBK1, EDNRB, ZC3H12A, STMN1, DHX58, TNFSF10, TBC1D10C, CYP1B1, TRIM25, TRIM26, HOMER3, LGALS9, SKP2, SOX7, SOX4, IER3, FBXO9, GBP5, DAXX, MEF2C, GBP7, RSAD2, DAPK2, STARD8, ARRDC3, SOX13, ACOD1, MTURN, WDR76, MOSMO, RNF125, CD109, IGTP, KCTD12, ALPK1, TRIB1, ATF3, KCTD16, TXK, PDGFB, IQGAP3, MNDAL, C3, HSPH1, RNF213, ZNHIT1, PDCD10, PRDX1, FIGNL1, S10…	1637	3267	20369	1.40539	5.82964e-09	1.21453e-10	1.14852e-10
GOTERM_BP_FAT	GO:0002758~innate immune response-activating signaling pathway	Innate Immune Response-Activating Signaling Pathway	41	2.12106	1.6709e-12	CD274, NLRP1A, OAS1A, CGAS, NOD1, OAS1B, NOD2, OAS1G, PYCARD, RNF135, IFIH1, TBK1, NFKBIZ, DHX58, TIFA, RNF170, TRIM25, LBP, CD14, HAVCR2, KCNJ8, IRGM2, IRGM1, NMI, GM15441, TIRAP, NFKBIA, RNF144A, STING1, TNIP1, TNIP2, OAS3, IRF1, IGTP, IRF7, TLR7, ALPK1, TLR4, TLR3, MYD88, TLR13	1637	144	20369	3.54277	1.4266e-08	2.91146e-10	2.75323e-10
GOTERM_BP_FAT	GO:0071345~cellular response to cytokine stimulus	Cellular Response To Cytokine Stimulus	153	7.91516	3.45241e-12	IFITM3, GM13275, PLVAP, CSF3, GM13276, CSF2, TFRC, CSF1, IFI213, IFI211, WBP1L, IFIT1, IFIT3, GM12185, IFIT2, PYCARD, RPS6KA4, CRHBP, ZC3H12A, CCRL2, PIM1, CYP1B1, TRIM25, EPHB4, IL13RA1, GBP6, GBP5, GBP8, DAXX, TGTP2, GBP7, TGTP1, GBP9, ACOD1, GM13283, F830016B08RIK, RNF125, IGTP, SRSF3, SRSF7, IFNAR1, PDE1B, DHX9, EBI3, IL4RA, PDGFB, CSF2RB, ZFP36L1, MNDAL, SOCS3, SBNO2, PDCD10, ABCA1, TREX1, I…	1637	1079	20369	1.76438	2.94771e-08	5.89534e-10	5.57496e-10
GOTERM_BP_FAT	GO:0019219~regulation of nucleobase-containing compound metabolic process	Regulation Of Nucleobase-Containing Compound Metabolic Process	451	23.3316	4.21784e-12	CDA, ANKLE1, TFRC, HNRNPR, BACH1, ELK3, TBK1, ZFP160, SOX18, ZC3H12A, CREB3L2, CYP1B1, JUNB, IER5, IER3, HES6, DAXX, MEF2C, GM7072, SOX13, MED8, MED6, RFX8, DEPDC1A, TXNIP, HOXB3, A630089N07RIK, HOXB7, HOXB6, ATF3, RD3, ZBTB8A, MEAF6, XPA, PDGFB, PLAC8, HSD11B1, HSPH1, FIGNL1, SFN, PPARGC1A, HEXIM1, JUN, BTBD18, NR2F1, LARP7, UPF3B, EIF2AK2, CDC7, NR2F2, PBX1, FLI1, NFATC4, FOSL2, MOV10, EIF6, PK…	1637	4218	20369	1.33043	3.6012e-08	7.04502e-10	6.66215e-10
GOTERM_BP_FAT	GO:0010628~positive regulation of gene expression	Positive Regulation Of Gene Expression	182	9.41542	4.29071e-12	N6AMT1, SPON1, CSF2, TFRC, CSF1, IFI213, TNC, GIMAP5, PRDM1, ETS1, PYCARD, CDH5, PNP, TBK1, CREB3L2, ZC3H12A, DHX58, HABP4, CYP1B1, LGALS9, B2M, SOX4, IL13RA1, ARRDC4, GBP5, MEF2C, RSAD2, SLC11A1, ARID5A, VASH1, TUG1, OLFM1, FCGR3, MYCN, SRSF5, CHIL5, ATF3, IFNAR1, CD274, DHX9, TXK, CHRNA7, HPN, IL4RA, PDGFB, PIK3R3, LPL, NTS, AGER, IQGAP3, MNDAL, C3, ZNHIT1, PDCD10, S100A13, CD14, PPARGC1A, SMAD…	1637	1361	20369	1.66393	3.66338e-08	7.04502e-10	6.66215e-10
GOTERM_BP_FAT	GO:0010557~positive regulation of macromolecule biosynthetic process	Positive Regulation Of Macromolecule Biosynthetic Process	316	16.3476	4.80476e-12	SPON1, TFRC, BACH1, ELK3, RPS6KA4, PNP, TBK1, SOX18, CREB3L2, ZC3H12A, DHX58, HABP4, CYP1B1, TRIM25, LGALS9, IER5, JUNB, SOX7, B2M, SOX4, ARRDC4, GBP5, HES6, DAXX, MEF2C, RSAD2, SLC11A1, MED8, MED6, JMJD6, SUB1, HOXB3, TRIM14, HOXB7, ATF3, MEAF6, DHX9, EPAS1, TXK, HPN, XPA, PDGFB, PIK3R3, IQGAP3, MNDAL, PLAC8, HELZ2, C3, HSPH1, ZNHIT1, PDCD10, S100A13, CD14, PATZ1, PPARGC1A, JUN, ZFP758, BTBD18, …	1637	2740	20369	1.43502	4.10226e-08	7.7402e-10	7.31956e-10
GOTERM_BP_FAT	GO:0009893~positive regulation of metabolic process	Positive Regulation Of Metabolic Process	415	21.4692	6.60796e-12	TFRC, HNRNPR, BACH1, ELK3, TBK1, SOX18, ZC3H12A, CREB3L2, CYP1B1, JUNB, IER5, IER3, GBP5, HES6, STARD4, DAXX, MEF2C, ATG10, MED8, MED6, IGTP, HOXB3, HOXB7, ATF3, MEAF6, HPN, XPA, PDGFB, IQGAP3, ARPP19, OAZ1, OAZ2, PLAC8, C3, HSPH1, RDH10, S100A13, NCKAP1L, PPARGC1A, JUN, BTBD18, PLK2, NR2F1, LARP7, UPF3B, EIF2AK2, CDC7, NR2F2, PBX1, FLI1, NFATC4, FOSL2, MOV10, EIF6, GIPC1, TNFSF4, PRXL2C, NOX4, H…	1637	3827	20369	1.34931	5.64186e-08	1.04479e-09	9.88012e-10
GOTERM_BP_FAT	GO:0034341~response to type II interferon	Response To Type Ii Interferon	39	2.01759	1.63227e-11	IFITM3, SP100, ATL3, ATL1, H2-Q7, WAS, GIMAP6, CCL5, PIM1, CCL2, GBP2, TRIM21, GBP4, GBP3, GBP6, GBP5, GBP2B, DAXX, GBP8, GBP7, GSN, TGTP1, NOS2, GBP9, STAT1, SLC11A1, IRGM1, ACOD1, BST2, GBP11, GBP10, IRF1, IGTP, CALM1, RAB7B, TLR4, CALM2, SHFL, TLR3	1637	141	20369	3.44165	1.39363e-07	2.50836e-09	2.37205e-09
GOTERM_BP_FAT	GO:0009891~positive regulation of biosynthetic process	Positive Regulation Of Biosynthetic Process	326	16.865	1.64521e-11	SPON1, TFRC, BACH1, ELK3, RPS6KA4, PNP, TBK1, SOX18, CREB3L2, ZC3H12A, DHX58, HABP4, CYP1B1, TRIM25, LGALS9, IER5, JUNB, SOX7, B2M, SOX4, ARRDC4, GBP5, HES6, DAXX, MEF2C, STARD4, RSAD2, SLC11A1, MED8, MED6, JMJD6, SUB1, HOXB3, TRIM14, HOXB7, ATF3, MEAF6, DHX9, EPAS1, TXK, HPN, XPA, PDGFB, PIK3R3, ARPP19, IQGAP3, MNDAL, PLAC8, HELZ2, SEC14L2, C3, HSPH1, ZNHIT1, PDCD10, RDH10, S100A13, CD14, PATZ1,…	1637	2875	20369	1.41091	1.40469e-07	2.50836e-09	2.37205e-09
GOTERM_BP_FAT	GO:0035556~intracellular signal transduction	Intracellular Signal Transduction	221	11.433	1.75297e-11	OXTR, TFRC, 2810408A11RIK, LRR1, AQP1, RPS6KA4, RASSF1, PNP, TBK1, EDNRB, SCN11A, DHX58, TBC1D10C, CYP1B1, TRIM25, IER3, PDK1, TIPIN, DAXX, MEF2C, WSB1, GM14137, DAPK2, ATG10, DEPDC1A, SPATA13, IGTP, DNA2, ALPK1, TRIB1, ATF3, PDE1B, XPA, PDGFB, TWF2, PIK3R3, IQGAP3, MNDAL, RHOT2, PDCD10, PRDX1, PLEK2, SFN, NCKAP1L, PEA15A, JUN, TREX1, PLK2, IRGM2, IRGM1, EIF2AK2, NR2F2, IGF1, CDC6, NFATC4, CCDC88…	1637	1774	20369	1.5501	1.49669e-07	2.62577e-09	2.48307e-09
GOTERM_BP_FAT	GO:0010604~positive regulation of macromolecule metabolic process	Positive Regulation Of Macromolecule Metabolic Process	382	19.762	2.07898e-11	SPON1, TFRC, HNRNPR, BACH1, ELK3, RPS6KA4, RASSF1, PNP, TBK1, EDNRB, SOX18, CREB3L2, ZC3H12A, DHX58, HABP4, CYP1B1, TRIM25, LGALS9, SKP2, IER5, JUNB, SOX7, B2M, SOX4, IER3, ARRDC4, GBP5, HES6, DAXX, MEF2C, RSAD2, SLC11A1, ARRDC3, MED8, ATG10, MED6, JMJD6, SUB1, IGTP, HOXB3, TRIM14, GSAP, DXO, DNA2, TRIB1, HOXB7, ATF3, DCUN1D5, MEAF6, DHX9, EPAS1, TXK, HPN, XPA, PDGFB, PIK3R3, IQGAP3, OAZ1, OAZ2, …	1637	3491	20369	1.36155	1.77503e-07	3.0604e-09	2.89408e-09
GOTERM_BP_FAT	GO:0009617~response to bacterium	Response To Bacterium	144	7.44956	2.4214e-11	CSF3, NCF1, NCF2, H2-K1, IFIT1, GIMAP6, IFIT3, AQP1, PYCARD, EDNRB, TBK1, ZC3H12A, DHX58, MACROD2, LGALS9, PGLYRP1, B2M, HERC6, GBP6, GBP5, GBP8, MEF2C, GBP7, TGTP1, SLC15A2, GBP9, SP110, SLC11A1, ARID5A, ACOD1, RNASE1, MPEG1, CLEC4D, IGTP, CMPK2, LY6A, ALPK1, TRIB1, S100A8, IFNAR1, CD274, CFH, LYZ2, MGST1, LPL, C2, PLAC8, C3, SBNO2, RNF213, CD14, ABCA1, JUN, CD160, IRGM2, IFI44, IRGM1, EIF2AK2, …	1637	1021	20369	1.75492	2.06739e-07	3.50406e-09	3.31363e-09
GOTERM_BP_FAT	GO:0048514~blood vessel morphogenesis	Blood Vessel Morphogenesis	84	4.34558	4.47717e-11	ACVRL1, COL18A1, ROBO4, FLT1, FLT4, ADM, PRDM1, TSPAN12, SAT1, LOXL2, ELK3, CDH5, HHEX, SOX18, ZC3H12A, CYP1B1, JUNB, EPHB4, SOX4, EGFL7, HEG1, VASH1, TGFBR1, PGF, JMJD6, TGFBR2, RHOB, BCAM, MMP14, EMCN, COL4A2, COL4A1, PXDN, RHOJ, CDH13, ITGA7, COL8A1, HOXB3, ANGPTL4, CFH, EPAS1, NOTCH4, PDGFB, ECSCR, PIK3R3, CXCR4, RASIP1, APOLD1, ZFP36L1, GJC1, DLL4, RNF213, PDCD10, CXCR3, S1PR1, CCL2, HES1, E…	1637	488	20369	2.14181	3.82261e-07	6.37102e-09	6.02478e-09
GOTERM_BP_FAT	GO:0062207~regulation of pattern recognition receptor signaling pathway	Regulation Of Pattern Recognition Receptor Signaling Pathway	46	2.37972	5.03209e-11	TRIM30A, IFI213, CGAS, GPS2, IFI35, NOD2, HMGB1, DDX60, MNDAL, CASP4, DHX58, RNF170, LBP, CD14, GBP2, SLC15A4, OASL1, IFI208, CCDC134, GBP5, IFI209, IFI206, IFI207, SLC15A2, RSAD2, TREX1, IFI203, IRGM2, IRGM1, EIF2AK2, ACOD1, TIRAP, GM12250, SPSB3, RNF125, IRF1, IGTP, IRF7, SMPDL3B, RAB7B, TLR4, S100A9, OGT, MYD88, HSPA1B, S100A8	1637	193	20369	2.96566	4.29639e-07	7.04327e-09	6.66051e-09
GOTERM_BP_FAT	GO:0045069~regulation of viral genome replication	Regulation Of Viral Genome Replication	31	1.60372	9.38987e-11	TOP2A, IFITM3, IFI213, OAS1A, OAS1B, ADAR, OAS1G, MNDAL, IFIH1, CCL5, OASL1, N4BP1, OASL2, IFI208, IFI209, APOBEC3, IFI206, IFI207, GBP7, RSAD2, MX2, IFI203, EIF2AK2, ISG15, ISG20, BST2, ZNFX1, OAS2, OAS3, PPIH, SHFL	1637	99	20369	3.89626	8.01707e-07	1.29308e-08	1.2228e-08
GOTERM_BP_FAT	GO:0030522~intracellular receptor signaling pathway	Intracellular Receptor Signaling Pathway	45	2.32799	1.04315e-10	KMT2E, NLRP1A, FLT1, OAS1A, CGAS, NOD1, OAS1B, RORB, NOD2, OAS1G, PYCARD, RNF135, IFIH1, TBK1, DHX58, TIFA, PIM1, RNF170, TRIM25, HAVCR2, DAXX, KCNJ8, IRGM2, IRGM1, IGF1, NR2F2, GM15441, PML, DNAJA1, NFKBIA, NR4A2, NR4A1, STING1, TNIP2, OAS3, IRF1, IGTP, IRF7, TAF7, TLR7, ALPK1, TLR4, TLR3, MYD88, TLR13	1637	190	20369	2.947	8.90642e-07	1.41372e-08	1.33689e-08
GOTERM_BP_FAT	GO:0001525~angiogenesis	Angiogenesis	69	3.56958	1.08225e-10	ACVRL1, COL18A1, ROBO4, FLT1, FLT4, TSPAN12, SAT1, LOXL2, ELK3, CDH5, SOX18, ZC3H12A, CYP1B1, EPHB4, EGFL7, VASH1, TGFBR1, PGF, JMJD6, TGFBR2, RHOB, BCAM, MMP14, EMCN, COL4A2, COL4A1, PXDN, RHOJ, CDH13, COL8A1, HOXB3, ANGPTL4, CFH, EPAS1, NOTCH4, PDGFB, ECSCR, PIK3R3, CXCR4, RASIP1, APOLD1, DLL4, RNF213, PDCD10, CXCR3, S1PR1, CCL2, E2F7, CCDC134, NUS1, JUN, ANGPT2, ANGPT1, SLC31A1, MCAM, PSG22, H…	1637	372	20369	2.30795	9.24028e-07	1.44379e-08	1.36533e-08
GOTERM_BP_FAT	GO:0001775~cell activation	Cell Activation	124	6.4149	1.27636e-10	GM13275, GM13276, CSF2, DCLRE1C, PRF1, PLAT, GIMAP5, IFI35, PYCARD, C1GALT1C1, PNP, TBK1, SCN11A, TBC1D10C, B2M, SOX4, MEF2C, RSAD2, SLC11A1, SOX13, JMJD6, GM13283, FCGR3, CLEC4D, ARMC5, IGTP, IFNAR1, KMT2E, CFH, CBFB, TXK, CHRNA7, EBI3, PSG16, ZBTB1, IL4RA, CPLX2, AGER, ZFP36L1, ADGRG3, C3, SBNO2, PRDX1, PATZ1, JAG2, JUN, TREX1, IGF1, NMI, HSPA12A, PBX1, GADD45G, FOSL2, NR4A1, CXCL10, IL6, RGCC,…	1637	856	20369	1.80247	1.08976e-06	1.67655e-08	1.58544e-08
GOTERM_BP_FAT	GO:0001944~vasculature development	Vasculature Development	101	5.22504	1.47571e-10	ZFAND5, PRDM1, SAT1, AQP1, LOXL2, ELK3, CDH5, SOX18, SCN11A, ZC3H12A, CYP1B1, JUNB, EPHB4, SOX4, MEF2C, VASH1, PGF, JMJD6, BCAM, EMCN, COL4A2, COL4A1, COL8A1, HOXB3, CFH, EPAS1, NOTCH4, PDGFB, ECSCR, PIK3R3, ZFP36L1, GJC1, C3, SOCS3, RNF213, PDCD10, CCDC134, NUS1, JUN, TREX1, MCAM, PSG22, NR2F2, IGF1, HSPA12B, SMAD5, NFATC4, NR4A1, PTPRB, BMP2, TNFSF4, ID1, TGFBI, HPSE, ACVRL1, COL18A1, ROBO4, FL…	1637	648	20369	1.9394	1.25996e-06	1.90903e-08	1.80529e-08
GOTERM_BP_FAT	GO:0050727~regulation of inflammatory response	Regulation Of Inflammatory Response	74	3.82825	1.97984e-10	H2-T23, NCF1, TNC, IFI35, ETS1, SPN, PYCARD, CDH5, LGALS2, EDNRB, CASP12, CASP3, CASP4, NFKBIZ, ADORA1, PBK, MAP3K8, SLC39A8, CCR7, LBP, LGALS9, PGLYRP1, IER3, ZBP1, GBP5, ACOD1, IL16, FCGR3, VAMP7, ADORA2A, IGTP, SMPDL3B, TLR4, S100A9, S100A8, CEBPB, NLRP1A, DHX9, CHRNA7, LPL, GPS2, NOD2, USP18, AGER, UACA, C3, SOCS3, NT5E, SBNO2, PDCD10, CCL5, GBP2, GBP3, GBP2B, PLA2G2D, CTLA2A, TREX1, IRGM2, I…	1637	418	20369	2.20281	1.69038e-06	2.51988e-08	2.38293e-08
GOTERM_BP_FAT	GO:0045321~leukocyte activation	Leukocyte Activation	112	5.7941	2.00693e-10	GM13275, GM13276, CSF2, DCLRE1C, PRF1, GIMAP5, IFI35, PYCARD, PNP, TBK1, SCN11A, TBC1D10C, B2M, SOX4, MEF2C, RSAD2, SLC11A1, SOX13, JMJD6, GM13283, FCGR3, CLEC4D, ARMC5, IGTP, IFNAR1, KMT2E, CBFB, TXK, CHRNA7, EBI3, PSG16, ZBTB1, IL4RA, CPLX2, AGER, ZFP36L1, ADGRG3, C3, SBNO2, PRDX1, PATZ1, JAG2, JUN, TREX1, NMI, HSPA12A, PBX1, GADD45G, FOSL2, NR4A1, IL6, TMEM98, TNFSF4, GPR183, BCL3, CD28, NFKBI…	1637	751	20369	1.85566	1.71351e-06	2.51988e-08	2.38293e-08
GOTERM_BP_FAT	GO:0033554~cellular response to stress	Cellular Response To Stress	212	10.9674	2.59616e-10	ANKLE1, ALKBH7, BACH1, AQP1, CRHBP, RASSF1, PNP, SCN11A, CREB3L2, ZC3H12A, PCLAF, CYP1B1, TRIM25, FBXO5, IER5, IER3, PDK1, WDHD1, TIPIN, DAXX, MEF2C, ZFP976, NSMCE2, ATG10, RECQL, OMG, ESCO2, WDR76, NEIL3, EID3, DNA2, MGARP, ATF3, CFTR, RNF121, DCUN1D5, DHX9, EPAS1, XPA, ZBTB1, MGST1, MNDAL, PDCD10, PRDX1, APOD, SFN, PPARGC1A, MCTS1, JUN, TREX1, EIF2AK2, CDC7, NFATC4, DHFR, PARP10, MSRA, H2AC20, …	1637	1733	20369	1.52215	2.2166e-06	3.21247e-08	3.03789e-08
GOTERM_BP_FAT	GO:0002521~leukocyte differentiation	Leukocyte Differentiation	84	4.34558	2.84025e-10	CSF3, CSF2, DCLRE1C, NRROS, TFRC, CSF1, FLT3, IFI213, TCIRG1, SLC4A2, GIMAP5, HMGB1, SPN, HHEX, CD1D1, PNP, TBK1, NFKBIZ, CCR7, JAK3, JUNB, B2M, SOX4, CCDC39, BATF2, MEF2C, RSAD2, RIPK3, IL15, SOX13, FOS, CBFA2T3, JMJD6, TGFBR2, CLEC4D, ARMC5, IRF1, CD109, IGTP, FAM20C, TLR4, NFIX, CBFB, PDE1B, TXK, ZBTB1, IL4RA, GPS2, IL6RA, HDAC9, ZFP36L1, RELB, MNDAL, ADGRG3, DLL4, SBNO2, HLX, DHRS7B, TSPAN2, …	1637	506	20369	2.06562	2.425e-06	3.46429e-08	3.27602e-08
GOTERM_BP_FAT	GO:0051240~positive regulation of multicellular organismal process	Positive Regulation Of Multicellular Organismal Process	233	12.0538	3.22241e-10	OXTR, TFRC, AQP1, PNP, TBK1, EDNRB, ZC3H12A, DHX58, CYP1B1, LGALS9, B2M, EPHB4, SOX4, ARRDC4, GBP5, MEF2C, RSAD2, SLC11A1, SOX13, TRIB1, HOXB7, CFTR, DHX9, EPAS1, TXK, PDGFB, ZBTB1, TWF2, IQGAP3, MNDAL, PLAC8, C3, HSPH1, S100A13, NCKAP1L, CD14, ICOS, PPARGC1A, GPIHBP1, ABCA1, JUN, IRGM1, EIF2AK2, IGF1, GADD45G, NFATC4, CCDC88B, BST1, TNFSF4, GPR183, CD28, CD200, ACVRL1, CD40, ZFP488, HILPDA, ADM,…	1637	1955	20369	1.48296	2.75129e-06	3.87506e-08	3.66446e-08
GOTERM_BP_FAT	GO:0002832~negative regulation of response to biotic stimulus	Negative Regulation Of Response To Biotic Stimulus	40	2.06932	3.53516e-10	H2-T23, CD274, IFI213, NLRC5, OAS1A, OAS1B, ADAR, PRDM1, NT5C2, SAMHD1, USP18, OAS1G, MNDAL, DHX58, PIM1, SFN, SERPINB9B, LGALS9, TRIM21, HAVCR2, IFI208, IFI209, IFI206, IFI207, TREX1, STAT2, IFI203, IRGM2, IRGM1, TRAFD1, TAP1, ACOD1, ISG15, NMI, PARP14, OAS3, IGTP, SMPDL3B, TRIB1, CLEC2D	1637	162	20369	3.07232	3.01832e-06	4.19211e-08	3.96429e-08
GOTERM_BP_FAT	GO:0065009~regulation of molecular function	Regulation Of Molecular Function	215	11.1226	3.82362e-10	SPON1, TFRC, IFIT2, CRHBP, C1GALT1C1, ZC3H12A, STMN1, HABP4, CYP1B1, TRIM25, TRIM26, HOMER3, FBXO5, LGALS9, B2M, TRIM21, ARRDC4, HES6, DAXX, MEF2C, SLC11A1, ARRDC3, ACOD1, MTURN, MYL4, PPP1R3F, IGTP, TRIM14, TRIB1, CFTR, RD3, DHX9, HPN, PDGFB, MNDAL, PDCD10, DPH3, SFN, PPARGC1A, GPIHBP1, NUS1, JUN, GADD45B, TREX1, IRGM2, IRGM1, EIF2AK2, LARP7, NR2F2, IGF1, PBX1, GADD45G, STFA3, NFATC4, DHFR, PARP…	1637	1772	20369	1.50972	3.2646e-06	4.47207e-08	4.22903e-08
GOTERM_BP_FAT	GO:0051252~regulation of RNA metabolic process	Regulation Of Rna Metabolic Process	412	21.314	4.65737e-10	TFRC, HNRNPR, BACH1, ELK3, TBK1, ZFP160, SOX18, ZC3H12A, CREB3L2, CYP1B1, JUNB, IER5, HES6, DAXX, MEF2C, GM7072, SOX13, MED8, MED6, RFX8, DEPDC1A, TXNIP, HOXB3, A630089N07RIK, HOXB7, HOXB6, ATF3, ZBTB8A, MEAF6, XPA, PDGFB, PLAC8, HSPH1, SFN, PPARGC1A, HEXIM1, JUN, BTBD18, NR2F1, LARP7, UPF3B, EIF2AK2, NR2F2, PBX1, FLI1, NFATC4, FOSL2, MOV10, PKIA, TNFSF4, NOSTRIN, HOXD4, HOXD3, PKIG, ARF4, DUBR, …	1637	3909	20369	1.31145	3.97645e-06	5.3736e-08	5.08157e-08
GOTERM_BP_FAT	GO:1903131~mononuclear cell differentiation	Mononuclear Cell Differentiation	74	3.82825	6.54072e-10	CSF2, DCLRE1C, NRROS, CSF1, FLT3, IFI213, TCIRG1, GIMAP5, HMGB1, SPN, HHEX, CD1D1, PNP, TBK1, NFKBIZ, CCR7, JAK3, B2M, SOX4, CCDC39, BATF2, MEF2C, RSAD2, RIPK3, IL15, SOX13, FOS, JMJD6, TGFBR2, CLEC4D, ARMC5, IRF1, IGTP, TLR4, NFIX, CBFB, PDE1B, TXK, ZBTB1, IL4RA, GPS2, IL6RA, HDAC9, ZFP36L1, RELB, MNDAL, ADGRG3, DLL4, HLX, TSPAN2, PATZ1, JAG2, IFI208, IFI209, IFI206, JUN, PLA2G2D, IFI207, TMEM17…	1637	429	20369	2.14632	5.58445e-06	7.44596e-08	7.0413e-08
GOTERM_BP_FAT	GO:0043068~positive regulation of programmed cell death	Positive Regulation Of Programmed Cell Death	103	5.3285	7.28885e-10	NCF2, PRF1, IFIT2, PYCARD, LGALS2, FAM162A, ZC3H12A, TNFSF10, CYP1B1, SOX4, PHLDA3, ZBP1, DAXX, MEF2C, SP110, DAPK2, OLFM1, BRMS1, MYCN, TXNIP, S100A9, RNF122, ATF3, S100A8, CD274, ECSCR, AGER, LDHA, BCL2L11, PDCD10, BMF, SKIL, PPARGC1A, PEA15A, IP6K2, TIA1, JUN, GADD45B, CD160, EIF2AK2, INHBB, GADD45G, NFATC4, NR4A1, IL6, BMP2, RGCC, CDK5, LCN2, ID3, NOX4, RNF183, NFKBID, MAP3K11, TOP2A, COL18A1…	1637	685	20369	1.87097	6.2232e-06	8.18845e-08	7.74344e-08
GOTERM_BP_FAT	GO:0032648~regulation of interferon-beta production	Regulation Of Interferon-Beta Production	25	1.29333	7.99748e-10	DHX9, HMGB2, OAS1A, OAS1B, HMGB1, OAS1G, RELB, PYCARD, RNF135, IFIH1, TBK1, ARRDC4, ISG15, NMI, TIRAP, STING1, OAS2, OAS3, IRF1, IRF7, TLR7, TLR4, TLR3, IFNAR1, TRIM56	1637	72	20369	4.32045	6.82823e-06	8.86786e-08	8.38593e-08
GOTERM_BP_FAT	GO:0034340~response to type I interferon	Response To Type I Interferon	24	1.24159	9.27424e-10	IFITM3, SP100, GM13275, GM13276, STAT1, MX2, STAT2, TREX1, OAS1A, ISG15, OAS1B, GM13283, OAS1G, IFIH1, OAS2, OAS3, IRF7, IKBKE, SHFL, OASL1, MYD88, IFNAR1, TRIM56, OASL2	1637	67	20369	4.45715	7.91831e-06	1.01517e-07	9.60002e-08
GOTERM_BP_FAT	GO:0001818~negative regulation of cytokine production	Negative Regulation Of Cytokine Production	61	3.15572	1.02773e-09	ABCD2, TRIM30A, FLT1, FLT3, ARRB1, GIMAP5, HMGB1, LRRC32, PYCARD, CASP3, ZC3H12A, DHX58, TSPO, HOMER3, CCR7, LBP, LGALS9, PGLYRP1, JAK3, HAVCR2, GBP7, SLC11A1, ACOD1, RNF125, OAS3, IGTP, TLR4, CD274, CHRNA7, OAS1A, OAS1B, FURIN, NOD2, AGER, HDAC9, OAS1G, RELB, SERPINB1A, SERPINB1B, SERPINB1C, GPNMB, APOD, NCKAP1L, GBP4, N4BP1, TIA1, ANGPT1, IRGM2, IRGM1, INHBB, IGF1, NMI, PML, BST2, IL6, RGCC, TN…	1637	326	20369	2.32827	8.77476e-06	1.11073e-07	1.05037e-07
GOTERM_BP_FAT	GO:0030097~hemopoiesis	Hemopoiesis	121	6.2597	1.08311e-09	CSF3, SAMD9L, NRROS, CSF2, DCLRE1C, TFRC, CSF1, IFI213, WBP1L, SLC4A2, GIMAP5, PNP, TBK1, SLC25A40, JUNB, B2M, SOX4, HERC6, ARL11, MEF2C, RSAD2, LMO2, SOX13, ESCO2, JMJD6, CLEC4D, ARMC5, CD109, IGTP, SBDS, HOXB3, HOXB7, KMT2E, CBFB, PDE1B, EPAS1, TXK, ZBTB1, IL4RA, ZFP36L1, MNDAL, ADGRG3, SBNO2, DHRS7B, TSPAN2, NCKAP1L, PATZ1, JAG2, CCDC134, JUN, TREX1, SMAD5, PBX1, FLI1, GADD45G, FOSL2, IL6, BMP…	1637	857	20369	1.75681	9.24755e-06	1.15595e-07	1.09313e-07
GOTERM_BP_FAT	GO:0032728~positive regulation of interferon-beta production	Positive Regulation Of Interferon-Beta Production	21	1.08639	1.14753e-09	ARRDC4, DHX9, HMGB2, OAS1A, ISG15, OAS1B, HMGB1, OAS1G, IFIH1, RNF135, TBK1, STING1, OAS2, OAS3, IRF1, IRF7, TLR7, TLR4, TLR3, IFNAR1, TRIM56	1637	52	20369	5.02501	9.79756e-06	1.20958e-07	1.14385e-07
GOTERM_BP_FAT	GO:0051090~regulation of DNA-binding transcription factor activity	Regulation Of Dna-Binding Transcription Factor Activity	66	3.41438	1.20853e-09	CD40, TRIM30B, TRIM30A, TFRC, TRIM30D, KDM8, ARRB1, PYCARD, TRIM5, ZC3H12A, PIM1, CYP1B1, TRIM25, TRIM26, HMGN3, IKBKE, TRIM21, HAVCR2, HES6, RIPK3, BUD31, ZFP932, CTNNBIP1, ACOD1, TRAF2, COMMD1, MTURN, TIRAP, BRMS1, ADGRF1, TRIM14, TRIB1, RAB7B, TLR4, TLR3, TRIM12C, SP100, NFIX, DHX9, NLRC5, NOD1, NOD2, NTS, AGER, ADGRG3, HES1, PPARGC1A, EIF2AK2, POU4F1, PBX1, PARP10, NFKBIA, IL6, BMP2, RGCC, ST…	1637	368	20369	2.2316	1.03184e-05	1.25835e-07	1.18996e-07
GOTERM_BP_FAT	GO:0071346~cellular response to type II interferon	Cellular Response To Type Ii Interferon	31	1.60372	1.25934e-09	ATL3, ATL1, H2-Q7, WAS, CCL5, PIM1, CCL2, GBP2, GBP4, GBP3, GBP6, GBP5, GBP2B, DAXX, GBP8, GBP7, GSN, NOS2, GBP9, STAT1, IRGM1, ACOD1, GBP11, GBP10, IRF1, IGTP, CALM1, RAB7B, TLR4, CALM2, TLR3	1637	109	20369	3.5388	1.07522e-05	1.29546e-07	1.22505e-07
GOTERM_BP_FAT	GO:0010605~negative regulation of macromolecule metabolic process	Negative Regulation Of Macromolecule Metabolic Process	325	16.8132	1.33865e-09	SPON1, ANKLE1, HNRNPR, BACH1, ELK3, TBK1, EDNRB, SOX18, MAGOH, ZC3H12A, DHX58, HABP4, HOMER3, FBXO5, LGALS9, PGLYRP1, SOX7, TRIM21, SOX4, HES6, WDHD1, TIPIN, ZFP973, ACOT8, DAXX, MEF2C, GBP7, SLC11A1, SOX13, ACOD1, RNF125, DEPDC1A, SUB1, CD109, IGTP, TXNIP, HOXB3, DXO, TRIB1, ATF3, ZBTB8A, DHX9, EPAS1, PDGFB, ZBTB1, IQGAP3, MNDAL, HELZ2, ZNHIT1, PDCD10, KCNQ1OT1, MOV10L1, APOD, SFN, NCKAP1L, H3C2…	1637	2973	20369	1.36022	1.14293e-05	1.36064e-07	1.2867e-07
GOTERM_BP_FAT	GO:0032481~positive regulation of type I interferon production	Positive Regulation Of Type I Interferon Production	28	1.44853	1.36251e-09	DHX9, FLT3, HMGB2, OAS1A, CGAS, OAS1B, HMGB1, OAS1G, RNF135, IFIH1, TBK1, DHX58, CD14, IKBKE, ARRDC4, STAT1, ISG15, STING1, OAS2, OAS3, IRF1, IRF7, TLR7, TLR4, TLR3, MYD88, IFNAR1, TRIM56	1637	91	20369	3.82858	1.16331e-05	1.3686e-07	1.29423e-07
GOTERM_BP_FAT	GO:0043065~positive regulation of apoptotic process	Positive Regulation Of Apoptotic Process	100	5.17331	1.45654e-09	NCF2, IFIT2, PYCARD, LGALS2, FAM162A, ZC3H12A, TNFSF10, CYP1B1, SOX4, PHLDA3, ZBP1, DAXX, MEF2C, SP110, DAPK2, OLFM1, BRMS1, TXNIP, S100A9, RNF122, ATF3, S100A8, CD274, ECSCR, AGER, LDHA, BCL2L11, PDCD10, BMF, SKIL, PPARGC1A, PEA15A, IP6K2, TIA1, JUN, GADD45B, CD160, EIF2AK2, INHBB, GADD45G, NFATC4, NR4A1, IL6, BMP2, RGCC, CDK5, LCN2, ID3, NOX4, RNF183, NFKBID, MAP3K11, TOP2A, COL18A1, TNFAIP8, C…	1637	666	20369	1.8683	1.24358e-05	1.44604e-07	1.36745e-07
GOTERM_BP_FAT	GO:0042127~regulation of cell population proliferation	Regulation Of Cell Population Proliferation	223	11.5365	1.85899e-09	IFITM3, SPARC, TFRC, SLC4A2, IFI35, IFIT3, AQP1, PNP, EDNRB, SOX18, FTH1, CYP1B1, FBXO5, LGALS9, SKP2, IER5, JUNB, SOX7, B2M, SOX4, TIPIN, MEF2C, CD109, TXNIP, TRIB1, ATF3, SDC4, DHX9, HPN, PDGFB, IQGAP3, PLAC8, PRDX4, ZNHIT1, PDCD10, S100A13, APOD, SFN, NCKAP1L, PPARGC1A, JAG2, JUN, IRGM1, EIF2AK2, CDC7, NR2F2, IGF1, NMI, CDC6, PBX1, FOSL2, PARP10, CCDC88B, CCDC88A, BST1, TNFSF4, GPR183, ID1, CD…	1637	1888	20369	1.46968	1.58719e-05	1.81857e-07	1.71974e-07
GOTERM_BP_FAT	GO:0006915~apoptotic process	Apoptotic Process	146	7.55303	1.87438e-09	ITPRIP, ARL6IP1, IFI213, IFIT2, PYCARD, PNP, FAM162A, ZC3H12A, TNFSF10, PIM1, CYP1B1, PGLYRP1, IER3, PHLDA3, PDK1, ZBP1, DAXX, MEF2C, SEMA6A, UNC5A, SP110, DAPK2, APLP1, SHISA5, BRMS1, FKBP8, S100A9, S100A8, BRSK2, XPA, ECSCR, ZFP36L1, MNDAL, RHOT2, BCL2L11, PDCD10, KCNQ1OT1, BMF, SFN, SKIL, PPARGC1A, PEA15A, JAG2, TIA1, JUN, UBE2B, GADD45B, INHBB, NSG1, IGF1, BMX, GADD45G, FOSL2, NFATC4, NR4A2, …	1637	1106	20369	1.64255	1.60033e-05	1.81857e-07	1.71974e-07
GOTERM_BP_FAT	GO:0050729~positive regulation of inflammatory response	Positive Regulation Of Inflammatory Response	38	1.96586	2.2615e-09	H2-T23, CEBPB, NLRP1A, DHX9, LPL, IFI35, ETS1, PYCARD, C3, LGALS2, CASP12, CASP3, CCL5, CASP4, NFKBIZ, CCR7, MAP3K8, LBP, GBP2, GBP3, ZBP1, GBP5, GBP2B, IL16, NMI, GM12250, NFKBIA, IL6, FCGR3, VAMP7, FABP4, TNIP1, TAFA3, TNFSF4, CD28, TLR4, S100A9, S100A8	1637	158	20369	2.99259	1.93085e-05	2.15692e-07	2.0397e-07
GOTERM_BP_FAT	GO:0001568~blood vessel development	Blood Vessel Development	93	4.81117	2.27363e-09	ACVRL1, COL18A1, ROBO4, FLT1, FLT4, ADM, PRDM1, TSPAN12, SAT1, LOXL2, ELK3, AQP1, CDH5, HHEX, SOX18, SCN11A, ZC3H12A, CYP1B1, JUNB, EPHB4, SOX4, ADAMTS6, EGFL7, MEF2C, HEG1, ABCC9, VASH1, TGFBR1, PGF, JMJD6, TGFBR2, RHOB, BCAM, MMP14, EMCN, COL4A2, COL4A1, PXDN, RHOJ, CDH13, ITGA7, COL8A1, HOXB3, ANGPTL4, CFH, EPAS1, NOTCH4, PDGFB, ECSCR, PIK3R3, CXCR4, RASIP1, APOLD1, ZFP36L1, GJC1, DLL4, SOCS3,…	1637	608	20369	1.90327	1.94121e-05	2.15692e-07	2.0397e-07
GOTERM_BP_FAT	GO:0008219~cell death	Cell Death	151	7.81169	2.65428e-09	ITPRIP, ARL6IP1, IFI213, PRF1, ALKBH7, IFIT2, PYCARD, PNP, FAM162A, ZC3H12A, TNFSF10, PIM1, CYP1B1, PGLYRP1, IER3, PHLDA3, PDK1, ZBP1, DAXX, MEF2C, SEMA6A, UNC5A, SP110, DAPK2, APLP1, SHISA5, BRMS1, TMEM79, FKBP8, S100A9, S100A8, BRSK2, XPA, ECSCR, ZFP36L1, MNDAL, RHOT2, BCL2L11, PDCD10, KCNQ1OT1, BMF, SFN, SKIL, PPARGC1A, PEA15A, JAG2, TIA1, JUN, UBE2B, GADD45B, INHBB, NSG1, IGF1, BMX, GADD45G, …	1637	1161	20369	1.61833	2.2662e-05	2.49036e-07	2.35502e-07
GOTERM_BP_FAT	GO:1902531~regulation of intracellular signal transduction	Regulation Of Intracellular Signal Transduction	241	12.4677	3.04172e-09	TFRC, IFI35, F11R, TBK1, EDNRB, ZC3H12A, STMN1, DHX58, TNFSF10, TBC1D10C, TRIM25, TRIM26, HOMER3, LGALS9, SKP2, SOX4, FBXO9, GBP5, MEF2C, GBP7, RSAD2, DAPK2, STARD8, ARRDC3, MTURN, WDR76, RNF125, IGTP, ALPK1, ATF3, PDGFB, IQGAP3, MNDAL, C3, HSPH1, ZNHIT1, PDCD10, PRDX1, FIGNL1, S100A13, NCKAP1L, ABCA1, HEXIM1, JUN, GADD45B, TREX1, IRGM2, IRGM1, EIF2AK2, IGF1, NMI, GADD45G, CCDC88A, BST1, PKIA, GP…	1637	2088	20369	1.43618	2.59699e-05	2.82285e-07	2.66944e-07
GOTERM_BP_FAT	GO:0045824~negative regulation of innate immune response	Negative Regulation Of Innate Immune Response	33	1.70719	3.22968e-09	H2-T23, IFI213, NLRC5, OAS1A, OAS1B, ADAR, SAMHD1, USP18, OAS1G, MNDAL, DHX58, PIM1, SFN, SERPINB9B, LGALS9, TRIM21, HAVCR2, IFI208, IFI209, IFI206, IFI207, TREX1, STAT2, IFI203, TRAFD1, TAP1, ACOD1, ISG15, NMI, PARP14, OAS3, SMPDL3B, CLEC2D	1637	126	20369	3.25885	2.75746e-05	2.96505e-07	2.80392e-07
GOTERM_BP_FAT	GO:0012501~programmed cell death	Programmed Cell Death	150	7.75996	3.57762e-09	ITPRIP, ARL6IP1, IFI213, PRF1, ALKBH7, IFIT2, PYCARD, PNP, FAM162A, ZC3H12A, TNFSF10, PIM1, CYP1B1, PGLYRP1, IER3, PHLDA3, PDK1, ZBP1, DAXX, MEF2C, SEMA6A, UNC5A, SP110, DAPK2, APLP1, SHISA5, BRMS1, TMEM79, FKBP8, S100A9, S100A8, BRSK2, XPA, ECSCR, ZFP36L1, MNDAL, RHOT2, BCL2L11, PDCD10, KCNQ1OT1, BMF, SFN, SKIL, PPARGC1A, PEA15A, JAG2, TIA1, JUN, UBE2B, GADD45B, INHBB, NSG1, IGF1, BMX, GADD45G, …	1637	1156	20369	1.61456	3.05452e-05	3.24954e-07	3.07294e-07
GOTERM_BP_FAT	GO:0002683~negative regulation of immune system process	Negative Regulation Of Immune System Process	91	4.70771	3.73263e-09	H2-T23, TRIM30A, FLT3, IFI213, CGAS, HMGB3, ADAR, SLC4A2, GIMAP5, HMGB1, PRDM1, LRRC32, SPN, CASP3, MMP28, ZC3H12A, DHX58, ADORA1, PIM1, TBC1D10C, EMILIN1, LGALS9, PGLYRP1, JAK3, TRIM21, HAVCR2, NCK1, PARP3, TRAFD1, TAP1, ACOD1, RNF125, ADORA2A, OAS3, IRF1, IGTP, TRIB1, SMPDL3B, RAB7B, CD274, CEBPB, SDC4, CBFB, SLFN1, NLRC5, IL4RA, ILDR2, OAS1A, GPS2, OAS1B, NOD2, SAMHD1, USP18, OAS1G, MNDAL, GPN…	1637	596	20369	1.89984	3.18686e-05	3.35465e-07	3.17234e-07
GOTERM_BP_FAT	GO:0009892~negative regulation of metabolic process	Negative Regulation Of Metabolic Process	344	17.7962	4.2078e-09	CDA, SPON1, ANKLE1, HNRNPR, BACH1, ELK3, TBK1, EDNRB, SOX18, MAGOH, ZC3H12A, DHX58, HABP4, HOMER3, FBXO5, LGALS9, PGLYRP1, SOX7, TRIM21, SOX4, IER3, HES6, WDHD1, TIPIN, ZFP973, ACOT8, DAXX, MEF2C, GBP7, SLC11A1, ARRDC3, SOX13, ACOD1, RNF125, DEPDC1A, SUB1, CD109, IGTP, TXNIP, HOXB3, DXO, TRIB1, ATF3, RD3, ZBTB8A, DHX9, EPAS1, HPN, PDGFB, ZBTB1, IQGAP3, OAZ1, MNDAL, HELZ2, ZNHIT1, PDCD10, KCNQ1OT1…	1637	3215	20369	1.33137	3.59256e-05	3.74231e-07	3.53894e-07
GOTERM_BP_FAT	GO:0023051~regulation of signaling	Regulation Of Signaling	405	20.9519	4.89858e-09	JRK, TFRC, 2810408A11RIK, F11R, CRHBP, TBK1, ZC3H12A, STMN1, CYP1B1, HOMER3, IER3, GBP5, DAXX, MEF2C, GBP7, STARD8, DAPK2, SOX13, WDR76, MOSMO, RNF125, IGTP, ATF3, PDGFB, IQGAP3, C3, HSPH1, RNF213, PRDX1, FIGNL1, S100A13, NCKAP1L, ABCA1, JAG2, HEXIM1, JUN, PLK2, EIF2AK2, NFATC4, GIPC1, PKIA, GPR183, TNFSF4, PRXL2C, NOX4, CDK10, SPEF1, KDM8, ADM, LRRC32, LITAF, C1QTNF1, TRIM5, PBK, NEFL, TSPO, ZFP…	1637	3901	20369	1.29181	4.18232e-05	4.31176e-07	4.07743e-07
GOTERM_BP_FAT	GO:0010646~regulation of cell communication	Regulation Of Cell Communication	405	20.9519	4.98199e-09	JRK, TFRC, 2810408A11RIK, F11R, CRHBP, TBK1, ZC3H12A, STMN1, CYP1B1, HOMER3, IER3, GBP5, DAXX, MEF2C, GBP7, STARD8, DAPK2, SOX13, WDR76, MOSMO, RNF125, IGTP, ATF3, PDGFB, IQGAP3, C3, HSPH1, RNF213, PRDX1, FIGNL1, S100A13, NCKAP1L, ABCA1, JAG2, HEXIM1, JUN, PLK2, EIF2AK2, NFATC4, GIPC1, PKIA, GPR183, TNFSF4, PRXL2C, NOX4, CDK10, SPEF1, KDM8, ADM, LRRC32, LITAF, C1QTNF1, TRIM5, PBK, NEFL, TSPO, ZFP…	1637	3903	20369	1.29115	4.25354e-05	4.34044e-07	4.10455e-07
GOTERM_BP_FAT	GO:0039531~regulation of cytoplasmic pattern recognition receptor signaling pathway	Regulation Of Cytoplasmic Pattern Recognition Receptor Signaling Pathway	34	1.75892	7.76187e-09	TRIM30A, IFI213, CGAS, HMGB1, DDX60, MNDAL, CASP4, DHX58, RNF170, GBP2, SLC15A4, OASL1, IFI208, GBP5, IFI209, IFI206, IFI207, SLC15A2, RSAD2, TREX1, IFI203, IRGM2, IRGM1, EIF2AK2, TIRAP, GM12250, SPSB3, RNF125, IGTP, RAB7B, TLR4, OGT, MYD88, HSPA1B	1637	137	20369	3.08801	6.62686e-05	6.69402e-07	6.33024e-07

## Sheet: S7. ADC106 miRNA target genes
Supplemental Table S7. Predicted miRNA regulated genes in top downregulated pathways for miRNAs with increased abundance in ADC106 cells treated with 100µM ENX.
miRNA	Term	Overlap	P.value	Adjusted.P.value	Odds.Ratio	Combined.Score	Genes	GO_Term
let-7a-3p	hsa-let-7a-3p	1/123	0.194344	0.400335	4.78375	7.83639	GREM1	Angiogenesis
let-7a-5p	hsa-let-7a-5p	1/639	0.679375	0.717202	0.890974	0.344434	EGR3	Angiogenesis
let-7b-5p	mmu-let-7b-5p	1/333	0.444651	0.525598	1.73928	1.40963	PDGFRB	Angiogenesis
let-7b-5p	hsa-let-7b-5p	1/1214	0.888488	0.888488	0.454682	0.0537588	CCDC134	Angiogenesis
miR-100-5p	hsa-miR-100-5p	1/250	0.356371	0.458051	2.32884	2.40286	BECN1	Angiogenesis
miR-10a-5p	hsa-miR-10a-5p	1/463	0.55978	0.608568	1.2416	0.720389	MMP14	Angiogenesis
miR-10b-5p	hsa-miR-10b-5p	1/322	0.433666	0.516477	1.79989	1.50377	APLNR	Angiogenesis
miR-146b-5p	mmu-miR-146b-5p	45672	0.0259397	0.275814	41.9139	153.069	SIRT1	Angiogenesis
miR-155-5p	hsa-miR-155-5p	2/903	0.47318	0.547043	1.28235	0.959552	CDH13;SIRT1	Angiogenesis
miR-16-5p	hsa-miR-16-5p	2/1555	0.767788	0.784187	0.718531	0.189865	APLNR;TGFBI	Angiogenesis
miR-17-5p	hsa-miR-17-5p	1/1181	0.881417	0.883281	0.46822	0.0591008	MMP2	Angiogenesis
miR-195a-5p	mmu-miR-195a-5p	13181	0.00180557	0.131901	35.5276	224.424	MMP2;SIRT1	Angiogenesis
miR-19b-3p	mmu-miR-19b-3p	1/310	0.421442	0.509601	1.87093	1.61662	FLVCR2	Angiogenesis
miR-21-5p	hsa-miR-21-5p	2/611	0.290079	0.41835	1.92626	2.38394	MMP2;TGFBI	Angiogenesis
miR-21a-5p	mmu-miR-21a-5p	12785	0.0595113	0.350235	17.2414	48.648	TGFBI	Angiogenesis
miR-22-3p	hsa-miR-22-3p	2/163	0.0329495	0.28914	7.45492	25.442	MMP14;SIRT1	Angiogenesis
miR-22-3p	mmu-miR-22-3p	45681	0.0411885	0.298818	25.5013	81.3388	SIRT1	Angiogenesis
miR-224-5p	hsa-miR-224-5p	2/132	0.0223145	0.248235	9.24709	35.1622	PDGFRB;EDNRA	Angiogenesis
miR-26b-5p	mmu-miR-26b-5p	45677	0.0344401	0.28914	30.8762	104.007	LEF1	Angiogenesis
miR-26b-5p	hsa-miR-26b-5p	3/1872	0.648676	0.690949	0.907705	0.392875	EGR3;TGFBI;LOXL2	Angiogenesis
miR-30c-5p	hsa-miR-30c-5p	2/520	0.23068	0.400466	2.2753	3.33724	BECN1;PRCP	Angiogenesis
miR-503-3p	hsa-miR-503-3p	18264	0.0839496	0.367304	11.9544	29.6174	EGR3	Angiogenesis
miR-9-5p	hsa-miR-9-5p	6/351	2.95622e-05	0.00700625	11.7661	122.709	PDGFRB;BECN1;MMP2;ZC3H12A;TGFBI;SIRT1	Angiogenesis
miR-9-5p	mmu-miR-9-5p	1/510	0.595399	0.639953	1.12423	0.582942	SIRT1	Angiogenesis
let-7a-3p	hsa-let-7a-3p	1/123	0.265693	0.468196	3.31683	4.39617	GREM1	Blood_vessel_dev_
let-7a-5p	hsa-let-7a-5p	1/639	0.803206	0.837885	0.617747	0.135376	EGR3	Blood_vessel_dev_
let-7b-5p	mmu-let-7b-5p	1/333	0.568525	0.666393	1.20593	0.680998	PDGFRB	Blood_vessel_dev_
let-7b-5p	hsa-let-7b-5p	3/1214	0.59207	0.679113	0.987701	0.517684	CCDC134;COL3A1;WARS2	Blood_vessel_dev_
miR-100-5p	hsa-miR-100-5p	1/250	0.467256	0.587915	1.6147	1.22859	BECN1	Blood_vessel_dev_
miR-10a-5p	hsa-miR-10a-5p	1/463	0.690426	0.743637	0.860853	0.3189	MMP14	Blood_vessel_dev_
miR-10b-5p	hsa-miR-10b-5p	1/322	0.556276	0.653058	1.24795	0.73191	APLNR	Blood_vessel_dev_
miR-146b-5p	mmu-miR-146b-5p	45672	0.0368633	0.303413	29.0612	95.9177	SIRT1	Blood_vessel_dev_
miR-155-5p	hsa-miR-155-5p	3/903	0.394293	0.535981	1.35106	1.25738	CDH2;CDH13;SIRT1	Blood_vessel_dev_
miR-16-5p	hsa-miR-16-5p	3/1555	0.757067	0.799779	0.756663	0.210582	APLNR;TGFBI;PLPP3	Blood_vessel_dev_
miR-17-5p	mmu-miR-17-5p	3/402	0.0791071	0.343571	3.12766	7.93472	CDH2;PLPP3;TBX3	Blood_vessel_dev_
miR-17-5p	hsa-miR-17-5p	1/1181	0.952502	0.953776	0.324628	0.0157972	MMP2	Blood_vessel_dev_
miR-195-5p	hsa-miR-195-5p	1/639	0.803206	0.837885	0.617747	0.135376	PLPP3	Blood_vessel_dev_
miR-195a-5p	mmu-miR-195a-5p	13181	0.00365493	0.114358	24.4069	136.963	MMP2;SIRT1	Blood_vessel_dev_
miR-19b-3p	mmu-miR-19b-3p	2/310	0.181503	0.430909	2.6572	4.53447	FLVCR2;PLPP3	Blood_vessel_dev_
miR-20a-5p	mmu-miR-20a-5p	16438	0.106639	0.389623	9.23284	20.6659	TBX3	Blood_vessel_dev_
miR-21-5p	hsa-miR-21-5p	3/611	0.196029	0.438375	2.03058	3.30883	TGFB2;MMP2;TGFBI	Blood_vessel_dev_
miR-21a-5p	mmu-miR-21a-5p	12785	0.0839496	0.345485	11.9544	29.6174	TGFBI	Blood_vessel_dev_
miR-22-3p	hsa-miR-22-3p	3/163	0.00786954	0.155113	7.89495	38.2491	MMP14;SIRT1;TBX3	Blood_vessel_dev_
miR-22-3p	mmu-miR-22-3p	45681	0.0583386	0.323682	17.6815	50.2417	SIRT1	Blood_vessel_dev_
miR-224-5p	mmu-miR-224-5p	45672	0.0368633	0.303413	29.0612	95.9177	WARS2	Blood_vessel_dev_
miR-224-5p	hsa-miR-224-5p	2/132	0.0431023	0.306727	6.35256	19.9736	PDGFRB;EDNRA	Blood_vessel_dev_
miR-26b-5p	mmu-miR-26b-5p	45677	0.0488526	0.313686	21.4082	64.6301	LEF1	Blood_vessel_dev_
miR-26b-5p	hsa-miR-26b-5p	3/1872	0.859108	0.873096	0.617499	0.093774	EGR3;TGFBI;LOXL2	Blood_vessel_dev_
miR-30c-5p	hsa-miR-30c-5p	2/520	0.374692	0.528661	1.56306	1.53438	BECN1;PRCP	Blood_vessel_dev_
miR-344d-3p	mmu-miR-344d-3p	1/146	0.307044	0.487238	2.78747	3.29135	DLX3	Blood_vessel_dev_
miR-503-3p	hsa-miR-503-3p	18264	0.117777	0.393815	8.28863	17.7291	EGR3	Blood_vessel_dev_
miR-7-5p	hsa-miR-7-5p	1/577	0.769046	0.810148	0.686437	0.180262	PLPP3	Blood_vessel_dev_
miR-9-5p	hsa-miR-9-5p	6/351	0.000231988	0.0347518	7.74901	64.8501	PDGFRB;BECN1;MMP2;ZC3H12A;TGFBI;SIRT1	Blood_vessel_dev_
miR-9-5p	mmu-miR-9-5p	1/510	0.725592	0.768697	0.77948	0.250031	SIRT1	Blood_vessel_dev_
miR-98-5p	hsa-miR-98-5p	2/785	0.589387	0.678112	1.01995	0.539222	PLPP3;WARS2	Blood_vessel_dev_
let-7a-3p	hsa-let-7a-3p	2/123	0.179497	0.445418	2.65457	4.55948	POLA2;HMGB2	E2F_targets
let-7a-5p	hsa-let-7a-5p	12/639	0.000671402	0.0307785	3.26003	23.8182	CCNB2;PRIM2;RRM2;ESPL1;RFC2;MYC;RAD21;SRSF2;NAP1L1;SMC1A;CDC25B;EZH2	E2F_targets
let-7b-5p	hsa-let-7b-5p	22/1214	5.80587e-06	0.00126094	3.34777	40.3629	HELLS;PRIM2;RRM2;MCM7;RFC2;PLK1;CDCA8;NAP1L1;CTCF;SMC1A;AURKA;CCNB2;MMS22L;ESPL1;MYC;ANP32E;CKS2;MCM4;BIRC5;NCAPD2;LBR;EZH2	E2F_targets
let-7b-5p	mmu-let-7b-5p	1/333	0.878197	0.891503	0.474713	0.0616579	DONSON	E2F_targets
let-7f-5p	hsa-let-7f-5p	8/397	0.0035183	0.0888245	3.42513	19.3512	CCNB2;PRIM2;RRM2;ESPL1;RFC2;MYC;NAP1L1;SMC1A	E2F_targets
let-7g-5p	hsa-let-7g-5p	7/341	0.00565405	0.108266	3.47069	17.9622	PRIM2;RRM2;ESPL1;RFC2;MYC;NAP1L1;SMC1A	E2F_targets
miR-100-5p	hsa-miR-100-5p	4/250	0.0719199	0.313211	2.63777	6.94315	DNMT1;RRM2;PLK1;USP1	E2F_targets
miR-10a-5p	hsa-miR-10a-5p	7/463	0.0263817	0.193094	2.52626	9.18316	NUP205;ESPL1;TRA2B;SRSF1;ANP32E;BIRC5;NAP1L1	E2F_targets
miR-10a-5p	mmu-miR-10a-5p	1/219	0.748573	0.780847	0.727175	0.21058	MCM5	E2F_targets
miR-10b-5p	hsa-miR-10b-5p	6/322	0.015805	0.146449	3.12079	12.9432	TCF19;TRA2B;SRSF1;ANP32E;NAP1L1;BRCA1	E2F_targets
miR-10b-5p	mmu-miR-10b-5p	1/218	0.746974	0.780113	0.730563	0.213123	MCM5	E2F_targets
miR-126-5p	hsa-miR-126-5p	2/119	0.170581	0.438237	2.74588	4.85622	TFRC;MYC	E2F_targets
miR-146a-5p	hsa-miR-146a-5p	5/201	0.00865733	0.113391	4.18346	19.8687	BRCA1;KIF22;BRCA2;LBR;CDKN3	E2F_targets
miR-146b-5p	hsa-miR-146b-5p	1/121	0.532761	0.647641	1.32762	0.83598	LBR	E2F_targets
miR-155-5p	hsa-miR-155-5p	18/903	1.29172e-05	0.00203868	3.60969	40.6342	DNMT1;RRM2;CSE1L;PLK1;SRSF1;KIF22;DEK;MLH1;AURKA;MMS22L;DIAPH3;MSH2;NASP;MYC;SRSF2;LUC7L3;NCAPD2;TRIP13	E2F_targets
miR-16-5p	hsa-miR-16-5p	18/1555	0.00801816	0.11264	2.00709	9.68631	TFRC;PLK1;SRSF1;CDCA8;BRCA1;MKI67;UNG;CDC20;MSH2;RACGAP1;CCNE1;MYC;CHEK1;CDK1;LUC7L3;BIRC5;KIF2C;NCAPD2	E2F_targets
miR-16-5p	mmu-miR-16-5p	15342	0.231715	0.495927	3.90126	5.70461	CCNE1	E2F_targets
miR-17-5p	hsa-miR-17-5p	18/1181	0.000393364	0.0216704	2.70663	21.2221	JPT1;DNMT1;RRM2;HMGB2;HMGB3;NAP1L1;MKI67;BRCA2;CIT;MELK;RACGAP1;MYC;RAD21;TRA2B;BRMS1L;SRSF2;NCAPD2;RBBP7	E2F_targets
miR-17-5p	mmu-miR-17-5p	3/402	0.461117	0.610385	1.2003	0.929152	MCM7;BRMS1L;LUC7L3	E2F_targets
miR-195-5p	hsa-miR-195-5p	7/639	0.105964	0.352182	1.80622	4.05436	RACGAP1;CCNE1;CHEK1;SRSF1;CDK1;LUC7L3;BIRC5	E2F_targets
miR-195a-5p	mmu-miR-195a-5p	13150	0.202205	0.466545	4.57143	7.3073	CCNE1	E2F_targets
miR-19b-3p	hsa-miR-19b-3p	8/713	0.0786748	0.317985	1.85925	4.72701	GINS1;DNMT1;DUT;RACGAP1;CHEK1;MYBL2;LBR;CIT	E2F_targets
miR-20a-5p	hsa-miR-20a-5p	16/1071	0.00104617	0.0427855	2.61855	17.9701	DNMT1;RFC3;RRM2;HMGB2;HMGB3;NAP1L1;CIT;NUDT21;MELK;RACGAP1;MYC;BRMS1L;SRSF2;KIF2C;NCAPD2;RBBP7	E2F_targets
miR-21-5p	hsa-miR-21-5p	6/611	0.183898	0.452679	1.60594	2.71946	TOP2A;MSH2;MYC;HMGB3;BRCA1;SMC1A	E2F_targets
miR-22-3p	hsa-miR-22-3p	3/163	0.0824467	0.32322	3.02997	7.5616	TFRC;PLK1;BUB1B	E2F_targets
miR-222-3p	hsa-miR-222-3p	10/394	0.000186469	0.0134885	4.41372	37.9017	PAN2;PRDX4;MCM7;MYC;ZW10;STMN1;SRSF2;NCAPD2;SMC6;POLE	E2F_targets
miR-26b-5p	hsa-miR-26b-5p	21/1872	0.0059563	0.108965	1.96621	10.0735	GINS1;SLBP;DUT;PCNA;LIG1;CDCA3;DSCC1;DONSON;NAP1L1;BRCA1;SMC4;CDC25B;LMNB1;RACGAP1;CCNE1;CKS2;TK1;ASF1B;EZH2;SPC25;MAD2L1	E2F_targets
miR-30c-5p	hsa-miR-30c-5p	8/520	0.0165035	0.148959	2.58587	10.6129	DNMT1;RRM2;MYC;TRA2B;HUS1;BIRC5;MYBL2;NAP1L1	E2F_targets
miR-374c-3p	hsa-miR-374c-3p	13210	0.00146372	0.050996	14.7854	96.5009	PCNA;HMGB2;DLGAP5	E2F_targets
miR-7-5p	hsa-miR-7-5p	9/577	0.0103413	0.120096	2.63725	12.0565	TOP2A;GINS1;HELLS;TFRC;CCNE1;MYC;SRSF1;CKS2;CDC25B	E2F_targets
miR-9-5p	hsa-miR-9-5p	3/351	0.376214	0.562544	1.3798	1.34889	TFRC;STMN1;SRSF1	E2F_targets
miR-9-5p	mmu-miR-9-5p	1/510	0.960796	0.960796	0.306832	0.0122711	STMN1	E2F_targets
miR-98-5p	hsa-miR-98-5p	10/785	0.0254475	0.190458	2.14306	7.86746	PRIM2;RRM2;ESPL1;RFC2;MYC;SUV39H1;NAP1L1;HMMR;SMC1A;EZH2	E2F_targets
let-7a-3p	hsa-let-7a-3p	1/123	0.214017	0.371838	4.27934	6.59746	GREM1	Extracellular_matrix_organization
let-7b-5p	hsa-let-7b-5p	1/1214	0.913237	0.917013	0.406734	0.0369151	COL3A1	Extracellular_matrix_organization
miR-10a-5p	mmu-miR-10a-5p	1/219	0.349371	0.445907	2.38327	2.5063	ECM2	Extracellular_matrix_organization
miR-10a-5p	hsa-miR-10a-5p	1/463	0.59922	0.64074	1.11067	0.568806	MMP14	Extracellular_matrix_organization
miR-10b-5p	mmu-miR-10b-5p	1/218	0.348085	0.445104	2.39437	2.5268	ECM2	Extracellular_matrix_organization
miR-16-5p	hsa-miR-16-5p	1/1555	0.957562	0.957562	0.311708	0.0135172	TGFBI	Extracellular_matrix_organization
miR-17-5p	mmu-miR-17-5p	1/402	0.547354	0.592749	1.28363	0.773594	MEGF9	Extracellular_matrix_organization
miR-17-5p	hsa-miR-17-5p	2/1181	0.679218	0.706262	0.861105	0.333087	MMP2;NPNT	Extracellular_matrix_organization
miR-1839-5p	mmu-miR-1839-5p	45669	0.0231568	0.302374	47.7273	179.715	ECM2	Extracellular_matrix_organization
miR-195a-5p	mmu-miR-195a-5p	13150	0.0679137	0.363486	14.9819	40.2942	MMP2	Extracellular_matrix_organization
miR-19b-3p	mmu-miR-19b-3p	1/310	0.45655	0.52453	1.67365	1.31224	NPNT	Extracellular_matrix_organization
miR-20a-5p	hsa-miR-20a-5p	1/1071	0.883345	0.88858	0.464609	0.0576297	NPNT	Extracellular_matrix_organization
miR-21-5p	hsa-miR-21-5p	6/611	0.00109634	0.0930515	5.81698	39.6473	TGFB2;MMP2;TGFBI;MMP9;DDR2;MEGF9	Extracellular_matrix_organization
miR-21a-5p	mmu-miR-21a-5p	12816	0.00211672	0.111611	32.6421	201.006	TGFBI;MMP9	Extracellular_matrix_organization
miR-22-3p	hsa-miR-22-3p	1/163	0.273456	0.39785	3.21621	4.17018	MMP14	Extracellular_matrix_organization
miR-222-3p	hsa-miR-222-3p	2/394	0.178931	0.363486	2.69843	4.64333	SERPINH1;MEGF9	Extracellular_matrix_organization
miR-26b-5p	hsa-miR-26b-5p	4/1872	0.502297	0.564668	1.10694	0.762201	COL15A1;SERPINH1;TGFBI;LOXL2	Extracellular_matrix_organization
miR-30c-5p	hsa-miR-30c-5p	1/520	0.642422	0.677493	0.985803	0.436227	DDR2	Extracellular_matrix_organization
miR-7-5p	hsa-miR-7-5p	1/577	0.681075	0.70711	0.885645	0.340161	ADAMTS17	Extracellular_matrix_organization
miR-9-5p	hsa-miR-9-5p	4/351	0.00472588	0.197784	6.45994	34.5911	MMP2;SERPINH1;TGFBI;MMP9	Extracellular_matrix_organization
miR-9-5p	mmu-miR-9-5p	1/510	0.635186	0.673358	1.00569	0.456418	MEGF9	Extracellular_matrix_organization
miR-98-5p	hsa-miR-98-5p	2/785	0.45609	0.52453	1.32394	1.03938	ADAMTS5;ECM2	Extracellular_matrix_organization
let-7a-3p	hsa-let-7a-3p	1/123	0.270221	0.441395	3.25033	4.25311	GREM1	Pos_reg_of_phosphorylation
let-7a-5p	hsa-let-7a-5p	1/639	0.809509	0.814856	0.605361	0.127929	EZH2	Pos_reg_of_phosphorylation
let-7b-5p	mmu-let-7b-5p	3/333	0.0530231	0.334377	3.71572	10.9132	PDGFRB;ERCC6;SRCIN1	Pos_reg_of_phosphorylation
let-7b-5p	hsa-let-7b-5p	4/1214	0.374817	0.489923	1.31802	1.2934	SPN;PLK1;ADNP;EZH2	Pos_reg_of_phosphorylation
miR-100-5p	hsa-miR-100-5p	2/250	0.133457	0.424941	3.24243	6.53017	PLK1;PFN2	Pos_reg_of_phosphorylation
miR-10a-5p	mmu-miR-10a-5p	1/219	0.430067	0.512928	1.81018	1.52746	ERCC6	Pos_reg_of_phosphorylation
miR-10b-5p	mmu-miR-10b-5p	1/218	0.428594	0.512928	1.81862	1.54082	ERCC6	Pos_reg_of_phosphorylation
miR-10b-5p	hsa-miR-10b-5p	1/322	0.563438	0.608682	1.22293	0.701592	APLNR	Pos_reg_of_phosphorylation
miR-126-5p	hsa-miR-126-5p	3/119	0.00347396	0.190065	10.6859	60.5084	SEMA7A;TFRC;ERCC6	Pos_reg_of_phosphorylation
miR-146a-5p	hsa-miR-146a-5p	1/201	0.402971	0.502593	1.9749	1.79497	SQSTM1	Pos_reg_of_phosphorylation
miR-146b-5p	mmu-miR-146b-5p	45672	0.0375874	0.322446	28.4786	93.4406	SIRT1	Pos_reg_of_phosphorylation
miR-146b-5p	hsa-miR-146b-5p	1/121	0.266461	0.441395	3.30483	4.37073	SQSTM1	Pos_reg_of_phosphorylation
miR-155-5p	hsa-miR-155-5p	5/903	0.0791789	0.382257	2.30597	5.84804	CAB39;CDK5;PLK1;AGRN;SIRT1	Pos_reg_of_phosphorylation
miR-16-5p	hsa-miR-16-5p	9/1555	0.0157673	0.269592	2.55078	10.5853	MAP4K2;TFRC;PLK1;APLNR;CLSPN;PLPP3;AGRN;SQSTM1;OGT	Pos_reg_of_phosphorylation
miR-16-5p	mmu-miR-16-5p	15342	0.101786	0.401179	9.71122	22.189	CD40	Pos_reg_of_phosphorylation
miR-17-5p	mmu-miR-17-5p	6/402	0.000532804	0.190065	6.5835	49.6222	MAP4K2;PLPP3;SRCIN1;SQSTM1;MAP3K5;PFN2	Pos_reg_of_phosphorylation
miR-17-5p	hsa-miR-17-5p	3/1181	0.586553	0.627606	0.995915	0.531312	SEMA7A;STIL;SQSTM1	Pos_reg_of_phosphorylation
miR-195-5p	hsa-miR-195-5p	5/639	0.0229842	0.289889	3.31145	12.4939	MAP4K2;CAB39;CLSPN;PLPP3;OGT	Pos_reg_of_phosphorylation
miR-195a-5p	mmu-miR-195a-5p	13150	0.0878926	0.382257	11.3794	27.6707	SIRT1	Pos_reg_of_phosphorylation
miR-19b-3p	mmu-miR-19b-3p	2/310	0.187094	0.424941	2.60284	4.36272	ERCC6;PLPP3	Pos_reg_of_phosphorylation
miR-19b-3p	hsa-miR-19b-3p	3/713	0.273241	0.441395	1.69357	2.19724	CAB39;LRP8;PFN2	Pos_reg_of_phosphorylation
miR-20a-5p	mmu-miR-20a-5p	16438	0.108654	0.410607	9.04773	20.0822	SQSTM1	Pos_reg_of_phosphorylation
miR-20a-5p	hsa-miR-20a-5p	4/1071	0.290949	0.443455	1.50607	1.85941	SEMA7A;STIL;SQSTM1;MAP3K5	Pos_reg_of_phosphorylation
miR-21-5p	hsa-miR-21-5p	4/611	0.0699051	0.369109	2.71191	7.21535	TGFB2;ADNP;MMP9;DDR2	Pos_reg_of_phosphorylation
miR-21a-5p	mmu-miR-21a-5p	12785	0.0855567	0.382257	11.7147	28.8015	MMP9	Pos_reg_of_phosphorylation
miR-22-3p	hsa-miR-22-3p	3/163	0.0083121	0.23297	7.73008	37.0274	TFRC;PLK1;SIRT1	Pos_reg_of_phosphorylation
miR-22-3p	mmu-miR-22-3p	45681	0.0594714	0.344866	17.327	48.9012	SIRT1	Pos_reg_of_phosphorylation
miR-224-5p	hsa-miR-224-5p	3/132	0.00464441	0.190065	9.60271	51.5866	PDGFRB;CD40;EDNRA	Pos_reg_of_phosphorylation
miR-26b-5p	hsa-miR-26b-5p	6/1872	0.342169	0.476863	1.2921	1.38572	C3;STIL;GPNMB;ADNP;PFN2;EZH2	Pos_reg_of_phosphorylation
miR-30c-5p	hsa-miR-30c-5p	1/520	0.739524	0.749929	0.748748	0.225934	DDR2	Pos_reg_of_phosphorylation
miR-7-5p	hsa-miR-7-5p	5/577	0.0154901	0.269592	3.68216	15.3456	TFRC;GFRA1;PLPP3;SQSTM1;PFN2	Pos_reg_of_phosphorylation
miR-9-5p	hsa-miR-9-5p	4/351	0.0121895	0.267374	4.80765	21.1882	PDGFRB;TFRC;SIRT1;MMP9	Pos_reg_of_phosphorylation
miR-9-5p	mmu-miR-9-5p	2/510	0.374847	0.489923	1.56203	1.53272	SIRT1;SRCIN1	Pos_reg_of_phosphorylation
miR-98-5p	hsa-miR-98-5p	4/785	0.139283	0.424941	2.08876	4.11746	C3;PLPP3;IP6K2;EZH2	Pos_reg_of_phosphorylation
let-7a-3p	hsa-let-7a-3p	1/123	0.31823	0.52172	2.66273	3.04877	GREM1	Reg_of_cell_adhesion
let-7a-5p	hsa-let-7a-5p	2/639	0.59356	0.675393	1.00999	0.526831	EGR3;DISC1	Reg_of_cell_adhesion
let-7b-5p	mmu-let-7b-5p	1/333	0.64746	0.711483	0.968102	0.420832	SRCIN1	Reg_of_cell_adhesion
let-7b-5p	hsa-let-7b-5p	2/1214	0.897224	0.904059	0.515017	0.0558532	SPN;DISC1	Reg_of_cell_adhesion
let-7f-5p	hsa-let-7f-5p	1/397	0.712057	0.756153	0.808992	0.274731	DISC1	Reg_of_cell_adhesion
let-7g-5p	hsa-let-7g-5p	2/341	0.285431	0.52172	1.92714	2.41616	DDR1;DISC1	Reg_of_cell_adhesion
miR-10a-5p	mmu-miR-10a-5p	1/219	0.49525	0.608225	1.48293	1.04204	ECM2	Reg_of_cell_adhesion
miR-10a-5p	hsa-miR-10a-5p	1/463	0.766463	0.802879	0.691079	0.183805	MMP14	Reg_of_cell_adhesion
miR-10b-5p	mmu-miR-10b-5p	1/218	0.493663	0.607081	1.48984	1.05168	ECM2	Reg_of_cell_adhesion
miR-10b-5p	hsa-miR-10b-5p	1/322	0.635005	0.700851	1.00184	0.454958	PIEZO1	Reg_of_cell_adhesion
miR-126-5p	hsa-miR-126-5p	1/119	0.309658	0.52172	2.75354	3.22794	TFRC	Reg_of_cell_adhesion
miR-146a-5p	hsa-miR-146a-5p	2/201	0.128721	0.474	3.30636	6.77841	CYTIP;L1CAM	Reg_of_cell_adhesion
miR-146b-5p	hsa-miR-146b-5p	1/121	0.313957	0.52172	2.70738	3.13649	CYTIP	Reg_of_cell_adhesion
miR-155-5p	hsa-miR-155-5p	2/903	0.776309	0.811356	0.704292	0.17833	CDH13;PTN	Reg_of_cell_adhesion
miR-16-5p	hsa-miR-16-5p	6/1555	0.351108	0.522429	1.27195	1.3313	TFRC;SLC4A2;PLPP3;L1CAM;PAG1;WNT4	Reg_of_cell_adhesion
miR-17-5p	mmu-miR-17-5p	3/402	0.128686	0.474	2.49	5.10544	ILDR2;PLPP3;SRCIN1	Reg_of_cell_adhesion
miR-17-5p	hsa-miR-17-5p	2/1181	0.888041	0.897736	0.530365	0.0629738	MMP2;NPNT	Reg_of_cell_adhesion
miR-1839-5p	mmu-miR-1839-5p	45669	0.0365819	0.42042	29.6975	98.2452	ECM2	Reg_of_cell_adhesion
miR-195-5p	hsa-miR-195-5p	2/639	0.59356	0.675393	1.00999	0.526831	PLPP3;PAG1	Reg_of_cell_adhesion
miR-195a-5p	mmu-miR-195a-5p	13150	0.10584	0.462593	9.32225	20.9361	MMP2	Reg_of_cell_adhesion
miR-19b-3p	mmu-miR-19b-3p	2/310	0.249745	0.52172	2.12446	2.94729	NPNT;PLPP3	Reg_of_cell_adhesion
miR-19b-3p	hsa-miR-19b-3p	1/713	0.895037	0.903178	0.442669	0.0490875	PLXNC1	Reg_of_cell_adhesion
miR-20a-5p	hsa-miR-20a-5p	1/1071	0.967209	0.967209	0.289076	0.00963794	NPNT	Reg_of_cell_adhesion
miR-21-5p	hsa-miR-21-5p	3/611	0.294158	0.52172	1.61658	1.97811	TGFB2;MMP2;PAG1	Reg_of_cell_adhesion
miR-22-3p	hsa-miR-22-3p	2/163	0.0909555	0.462593	4.09462	9.81637	MMP14;TFRC	Reg_of_cell_adhesion
miR-222-3p	hsa-miR-222-3p	1/394	0.709308	0.754098	0.815292	0.280024	PLXNC1	Reg_of_cell_adhesion
miR-26b-5p	mmu-miR-26b-5p	45677	0.0602351	0.432386	17.1864	48.2851	LEF1	Reg_of_cell_adhesion
miR-26b-5p	hsa-miR-26b-5p	6/1872	0.528961	0.627972	1.03767	0.660828	C1QTNF1;EGR3;GPNMB;PLXNC1;CYTIP;L1CAM	Reg_of_cell_adhesion
miR-344d-3p	mmu-miR-344d-3p	1/146	0.365524	0.52275	2.23776	2.25214	PLXNC1	Reg_of_cell_adhesion
miR-503-3p	hsa-miR-503-3p	18295	0.0105266	0.42042	13.8125	62.9001	EGR3;L1CAM	Reg_of_cell_adhesion
miR-7-5p	hsa-miR-7-5p	2/577	0.537603	0.63434	1.12249	0.696658	TFRC;PLPP3	Reg_of_cell_adhesion
miR-9-5p	hsa-miR-9-5p	3/351	0.0952889	0.462593	2.86236	6.72896	TFRC;MMP2;ZC3H12A	Reg_of_cell_adhesion
miR-9-5p	mmu-miR-9-5p	1/510	0.798906	0.825655	0.625753	0.140489	SRCIN1	Reg_of_cell_adhesion
miR-98-5p	hsa-miR-98-5p	3/785	0.441426	0.567618	1.24557	1.01856	ECM2;PLPP3;DISC1	Reg_of_cell_adhesion
let-7a-3p	hsa-let-7a-3p	1/123	0.305456	0.46519	2.80088	3.3217	UBXN2B	Reg_of_cell_cycle
let-7a-5p	hsa-let-7a-5p	5/639	0.0398997	0.378436	2.81969	9.08332	RRM2;UBXN2B;E2F1;DNA2;EZH2	Reg_of_cell_cycle
let-7b-5p	hsa-let-7b-5p	8/1214	0.0254567	0.378436	2.43683	8.94508	RRM2;UBXN2B;FANCD2;CCNF;PLK1;NCAPD2;DNA2;EZH2	Reg_of_cell_cycle
let-7b-5p	mmu-let-7b-5p	2/333	0.257665	0.455613	2.07876	2.819	PDGFRB;ERCC6	Reg_of_cell_cycle
let-7f-5p	hsa-let-7f-5p	4/397	0.0295832	0.378436	3.61749	12.7355	RRM2;UBXN2B;DNA2;ATR	Reg_of_cell_cycle
let-7g-5p	hsa-let-7g-5p	3/341	0.0795315	0.409099	3.10698	7.86565	RRM2;UBXN2B;DNA2	Reg_of_cell_cycle
miR-100-5p	hsa-miR-100-5p	4/250	0.0063339	0.307368	5.82262	29.4731	BECN1;RRM2;UBXN2B;PLK1	Reg_of_cell_cycle
miR-10a-5p	mmu-miR-10a-5p	2/219	0.136435	0.442777	3.18926	6.35272	RMI2;ERCC6	Reg_of_cell_cycle
miR-10a-5p	hsa-miR-10a-5p	1/463	0.74941	0.763984	0.726937	0.209699	E2F1	Reg_of_cell_cycle
miR-10b-5p	mmu-miR-10b-5p	2/218	0.135434	0.442777	3.20419	6.40604	RMI2;ERCC6	Reg_of_cell_cycle
miR-126-5p	hsa-miR-126-5p	1/119	0.297149	0.46519	2.89641	3.51485	ERCC6	Reg_of_cell_cycle
miR-146b-5p	mmu-miR-146b-5p	45672	0.0433625	0.378436	24.5406	77.0125	SIRT1	Reg_of_cell_cycle
miR-155-5p	hsa-miR-155-5p	6/903	0.0494194	0.378436	2.40348	7.22827	RRM2;UBXN2B;CDK5;PLK1;NCAPD2;SIRT1	Reg_of_cell_cycle
miR-16-5p	hsa-miR-16-5p	6/1555	0.308871	0.468957	1.34417	1.57917	UBXN2B;PLK1;KIF23;NCAPD2;CLSPN;WNT4	Reg_of_cell_cycle
miR-17-5p	hsa-miR-17-5p	7/1181	0.0579615	0.388926	2.1519	6.12855	STIL;RRM2;E2F1;KIF23;NCAPD2;PKMYT1;CIT	Reg_of_cell_cycle
miR-195-5p	hsa-miR-195-5p	2/639	0.566467	0.6255	1.06332	0.604323	KIF23;CLSPN	Reg_of_cell_cycle
miR-195a-5p	mmu-miR-195a-5p	13150	0.10098	0.441019	9.80591	22.4833	SIRT1	Reg_of_cell_cycle
miR-19b-3p	mmu-miR-19b-3p	1/310	0.602678	0.656748	1.09541	0.554686	ERCC6	Reg_of_cell_cycle
miR-19b-3p	hsa-miR-19b-3p	1/713	0.882922	0.882922	0.465638	0.0579805	CIT	Reg_of_cell_cycle
miR-20a-5p	hsa-miR-20a-5p	7/1071	0.0374355	0.378436	2.38828	7.84584	STIL;RRM2;E2F1;KIF23;NCAPD2;PKMYT1;CIT	Reg_of_cell_cycle
miR-21-5p	hsa-miR-21-5p	4/611	0.105791	0.442777	2.31649	5.20351	E2F1;ATP2B4;KNL1;DDR2	Reg_of_cell_cycle
miR-22-3p	mmu-miR-22-3p	45681	0.0684871	0.398907	14.931	40.0318	SIRT1	Reg_of_cell_cycle
miR-22-3p	hsa-miR-22-3p	2/163	0.0835853	0.409099	4.31078	10.6989	PLK1;SIRT1	Reg_of_cell_cycle
miR-222-3p	hsa-miR-222-3p	3/394	0.110396	0.442777	2.67857	5.90271	CDKN1C;NCAPD2;KNSTRN	Reg_of_cell_cycle
miR-224-5p	hsa-miR-224-5p	1/132	0.323795	0.474963	2.60726	2.94007	PDGFRB	Reg_of_cell_cycle
miR-26b-5p	mmu-miR-26b-5p	45677	0.0574017	0.388926	18.078	51.6613	LEF1	Reg_of_cell_cycle
miR-26b-5p	hsa-miR-26b-5p	4/1872	0.814975	0.822407	0.70364	0.143963	STIL;ZNHIT1;GPNMB;EZH2	Reg_of_cell_cycle
miR-30c-5p	hsa-miR-30c-5p	4/520	0.0671823	0.398907	2.73784	7.39312	BECN1;RRM2;CCNF;DDR2	Reg_of_cell_cycle
miR-7-5p	hsa-miR-7-5p	1/577	0.822667	0.826818	0.579652	0.11315	UBXN2B	Reg_of_cell_cycle
miR-9-5p	hsa-miR-9-5p	3/351	0.0850236	0.409099	3.01616	7.43432	PDGFRB;BECN1;SIRT1	Reg_of_cell_cycle
miR-9-5p	mmu-miR-9-5p	2/510	0.446094	0.542503	1.34224	1.08349	CCNF;SIRT1	Reg_of_cell_cycle
miR-98-5p	hsa-miR-98-5p	6/785	0.027718	0.378436	2.7847	9.98503	RRM2;UBXN2B;CCNF;E2F1;DNA2;EZH2	Reg_of_cell_cycle
let-7a-3p	hsa-let-7a-3p	3/123	0.0340795	0.465483	4.41183	14.9078	GREM1;BTG1;BRPF3	Reg_of_multicellular_organism_dev_
let-7a-5p	hsa-let-7a-5p	5/639	0.306566	0.623326	1.3802	1.63184	EGR3;E2F1;DISC1;FXN;EZH2	Reg_of_multicellular_organism_dev_
let-7b-5p	hsa-let-7b-5p	8/1214	0.398202	0.645615	1.15801	1.06629	SP100;FANCD2;BRPF3;ADNP;DISC1;FXN;EZH2;WARS2	Reg_of_multicellular_organism_dev_
let-7b-5p	mmu-let-7b-5p	1/333	0.855782	0.877455	0.516619	0.0804579	TBC1D24	Reg_of_multicellular_organism_dev_
let-7f-5p	hsa-let-7f-5p	3/397	0.400333	0.645615	1.32508	1.21305	CAPRIN2;DISC1;FXN	Reg_of_multicellular_organism_dev_
let-7g-5p	hsa-let-7g-5p	2/341	0.586303	0.720837	1.02049	0.544861	DISC1;FXN	Reg_of_multicellular_organism_dev_
miR-100-5p	hsa-miR-100-5p	1/250	0.765599	0.804254	0.691749	0.184764	FXN	Reg_of_multicellular_organism_dev_
miR-10a-5p	hsa-miR-10a-5p	3/463	0.499462	0.686525	1.13111	0.785246	MMP14;MEAF6;E2F1	Reg_of_multicellular_organism_dev_
miR-10a-5p	mmu-miR-10a-5p	1/219	0.719122	0.778356	0.791365	0.260932	TBC1D24	Reg_of_multicellular_organism_dev_
miR-10b-5p	mmu-miR-10b-5p	1/218	0.717479	0.77714	0.795052	0.263966	TBC1D24	Reg_of_multicellular_organism_dev_
miR-10b-5p	hsa-miR-10b-5p	1/322	0.846175	0.868794	0.534623	0.0892974	APLNR	Reg_of_multicellular_organism_dev_
miR-126-5p	hsa-miR-126-5p	1/119	0.497551	0.685678	1.46945	1.02576	SEMA7A	Reg_of_multicellular_organism_dev_
miR-146a-5p	hsa-miR-146a-5p	2/201	0.32176	0.623326	1.75088	1.9854	ISG15;L1CAM	Reg_of_multicellular_organism_dev_
miR-146b-5p	mmu-miR-146b-5p	45672	0.082891	0.501952	12.4505	31.0046	SIRT1	Reg_of_multicellular_organism_dev_
miR-155-5p	mmu-miR-155-5p	29281	0.0110377	0.380206	6.89054	31.0518	MAF;MAFB;MYB	Reg_of_multicellular_organism_dev_
miR-155-5p	hsa-miR-155-5p	9/903	0.0760612	0.501952	1.80363	4.64654	MAFB;CDH2;CDK5;BRPF3;MYB;AMIGO2;PTN;AGRN;SIRT1	Reg_of_multicellular_organism_dev_
miR-16-5p	mmu-miR-16-5p	15342	0.215294	0.596957	4.24561	6.52021	CD40	Reg_of_multicellular_organism_dev_
miR-16-5p	hsa-miR-16-5p	10/1555	0.404404	0.645615	1.13053	1.02351	HEYL;ADGRE5;MYB;APLNR;ADGRL1;SLC4A2;L1CAM;AGRN;SOX5;WNT4	Reg_of_multicellular_organism_dev_
miR-17-5p	mmu-miR-17-5p	2/402	0.675696	0.758097	0.862168	0.33798	CDH2;TBX3	Reg_of_multicellular_organism_dev_
miR-17-5p	hsa-miR-17-5p	6/1181	0.679854	0.758097	0.876518	0.338229	SEMA7A;CAPRIN2;FANCA;E2F1;HMGB3;CIT	Reg_of_multicellular_organism_dev_
miR-195-5p	hsa-miR-195-5p	2/639	0.886132	0.899238	0.534808	0.0646528	HEYL;MYB	Reg_of_multicellular_organism_dev_
miR-1957a	mmu-miR-1957a	45663	0.0340118	0.465483	34.8772	117.921	TBC1D24	Reg_of_multicellular_organism_dev_
miR-195a-5p	mmu-miR-195a-5p	13150	0.187614	0.573331	4.97494	8.32491	SIRT1	Reg_of_multicellular_organism_dev_
miR-19b-3p	hsa-miR-19b-3p	6/713	0.227553	0.602303	1.49317	2.21044	BTG1;CAPRIN2;PLXNC1;TNFRSF1B;LRP8;CIT	Reg_of_multicellular_organism_dev_
miR-20a-5p	mmu-miR-20a-5p	16438	0.228781	0.602303	3.95554	5.83439	TBX3	Reg_of_multicellular_organism_dev_
miR-20a-5p	hsa-miR-20a-5p	6/1071	0.584897	0.720837	0.972735	0.521697	SEMA7A;PTPRS;CAPRIN2;E2F1;HMGB3;CIT	Reg_of_multicellular_organism_dev_
miR-21-5p	hsa-miR-21-5p	8/611	0.0247956	0.465483	2.39079	8.83896	TGFB2;E2F1;ATP2B4;HMGB3;ADNP;MMP9;SOX5;DDR2	Reg_of_multicellular_organism_dev_
miR-21a-5p	mmu-miR-21a-5p	12816	0.0172333	0.445095	10.6474	43.238	MMP9;SOX5	Reg_of_multicellular_organism_dev_
miR-22-3p	hsa-miR-22-3p	4/163	0.0146148	0.405426	4.47074	18.8921	MMP14;BTG1;SIRT1;TBX3	Reg_of_multicellular_organism_dev_
miR-22-3p	mmu-miR-22-3p	45681	0.129317	0.524979	7.57513	15.4948	SIRT1	Reg_of_multicellular_organism_dev_
miR-222-3p	hsa-miR-222-3p	3/394	0.395681	0.645615	1.33545	1.23816	CDKN1C;SRRT;PLXNC1	Reg_of_multicellular_organism_dev_
miR-224-5p	mmu-miR-224-5p	45672	0.082891	0.501952	12.4505	31.0046	WARS2	Reg_of_multicellular_organism_dev_
miR-224-5p	hsa-miR-224-5p	1/132	0.534061	0.703008	1.32275	0.829691	CD40	Reg_of_multicellular_organism_dev_
miR-26b-5p	mmu-miR-26b-5p	45677	0.108978	0.514779	9.17174	20.3301	LEF1	Reg_of_multicellular_organism_dev_
miR-26b-5p	hsa-miR-26b-5p	13/1872	0.278623	0.604766	1.23584	1.57928	EGR3;BTG1;MEAF6;L1CAM;LOXL2;C3;RPS6KA6;ADGRE5;ULK2;PLXNC1;ADNP;SOX5;EZH2	Reg_of_multicellular_organism_dev_
miR-30c-5p	hsa-miR-30c-5p	1/520	0.952084	0.953003	0.327316	0.0160719	DDR2	Reg_of_multicellular_organism_dev_
miR-344d-3p	mmu-miR-344d-3p	2/146	0.205078	0.586046	2.42638	3.84427	SOX11;PLXNC1	Reg_of_multicellular_organism_dev_
miR-503-3p	hsa-miR-503-3p	18323	0.00298173	0.194202	11.3058	65.7464	EGR3;L1CAM;PLXNA3	Reg_of_multicellular_organism_dev_
miR-7-5p	hsa-miR-7-5p	1/577	0.965825	0.965825	0.294058	0.0102251	HAP1	Reg_of_multicellular_organism_dev_
miR-9-5p	hsa-miR-9-5p	4/351	0.144064	0.551314	2.02903	3.93124	FBN2;ZC3H12A;SIRT1;MMP9	Reg_of_multicellular_organism_dev_
miR-9-5p	mmu-miR-9-5p	2/510	0.795284	0.825597	0.67511	0.154638	TBC1D24;SIRT1	Reg_of_multicellular_organism_dev_
miR-98-5p	hsa-miR-98-5p	7/785	0.166269	0.573331	1.5918	2.85591	C3;FZD3;E2F1;DISC1;FXN;EZH2;WARS2	Reg_of_multicellular_organism_dev_
let-7a-5p	hsa-let-7a-5p	4/639	0.0548727	0.30274	2.96831	8.61624	E2F1;DISC1;FXN;EZH2	Reg_of_neurogenesis
let-7b-5p	hsa-let-7b-5p	4/1214	0.29081	0.426905	1.51139	1.86669	ADNP;DISC1;FXN;EZH2	Reg_of_neurogenesis
let-7b-5p	mmu-let-7b-5p	1/333	0.530645	0.581694	1.3433	0.851202	TBC1D24	Reg_of_neurogenesis
let-7f-5p	hsa-let-7f-5p	3/397	0.0597215	0.308763	3.54623	9.9935	CAPRIN2;DISC1;FXN	Reg_of_neurogenesis
let-7g-5p	hsa-let-7g-5p	2/341	0.178658	0.38487	2.69136	4.63529	DISC1;FXN	Reg_of_neurogenesis
miR-100-5p	hsa-miR-100-5p	1/250	0.432589	0.497013	1.79865	1.50721	FXN	Reg_of_neurogenesis
miR-10a-5p	mmu-miR-10a-5p	1/219	0.391048	0.470344	2.05765	1.93198	TBC1D24	Reg_of_neurogenesis
miR-10a-5p	hsa-miR-10a-5p	1/463	0.651867	0.669652	0.958924	0.410338	E2F1	Reg_of_neurogenesis
miR-10b-5p	mmu-miR-10b-5p	1/218	0.389659	0.469979	2.06724	1.94834	TBC1D24	Reg_of_neurogenesis
miR-126-5p	hsa-miR-126-5p	1/119	0.235739	0.4083	3.82069	5.52101	SEMA7A	Reg_of_neurogenesis
miR-146a-5p	hsa-miR-146a-5p	1/201	0.365578	0.459969	2.24489	2.25898	L1CAM	Reg_of_neurogenesis
miR-155-5p	mmu-miR-155-5p	29221	0.165197	0.381275	5.71807	10.296	MYB	Reg_of_neurogenesis
miR-155-5p	hsa-miR-155-5p	3/903	0.332065	0.443017	1.5123	1.6672	CDK5;MYB;PTN	Reg_of_neurogenesis
miR-16-5p	hsa-miR-16-5p	3/1555	0.69044	0.70261	0.846972	0.313741	HEYL;MYB;L1CAM	Reg_of_neurogenesis
miR-17-5p	hsa-miR-17-5p	4/1181	0.274004	0.42067	1.5565	2.01506	SEMA7A;CAPRIN2;E2F1;CIT	Reg_of_neurogenesis
miR-195-5p	hsa-miR-195-5p	2/639	0.423707	0.489241	1.41054	1.21124	HEYL;MYB	Reg_of_neurogenesis
miR-1957a	mmu-miR-1957a	45663	0.0134258	0.270679	90.6818	390.891	TBC1D24	Reg_of_neurogenesis
miR-19b-3p	hsa-miR-19b-3p	5/713	0.0213958	0.270679	3.39813	13.0643	CAPRIN2;PLXNC1;TNFRSF1B;LRP8;CIT	Reg_of_neurogenesis
miR-20a-5p	hsa-miR-20a-5p	5/1071	0.0912784	0.355669	2.21494	5.30221	SEMA7A;PTPRS;CAPRIN2;E2F1;CIT	Reg_of_neurogenesis
miR-21-5p	hsa-miR-21-5p	2/611	0.401569	0.475643	1.47753	1.34806	E2F1;ADNP	Reg_of_neurogenesis
miR-222-3p	hsa-miR-222-3p	2/394	0.222097	0.401537	2.32119	3.49256	SRRT;PLXNC1	Reg_of_neurogenesis
miR-26b-5p	mmu-miR-26b-5p	45677	0.0440713	0.270679	23.8469	74.4487	LEF1	Reg_of_neurogenesis
miR-26b-5p	hsa-miR-26b-5p	5/1872	0.414457	0.481771	1.21103	1.06666	ULK2;PLXNC1;ADNP;L1CAM;EZH2	Reg_of_neurogenesis
miR-344d-3p	mmu-miR-344d-3p	2/146	0.0427109	0.270679	6.3989	20.1777	SOX11;PLXNC1	Reg_of_neurogenesis
miR-503-3p	hsa-miR-503-3p	18295	0.00566179	0.256255	19.2897	99.8053	L1CAM;PLXNA3	Reg_of_neurogenesis
miR-7-5p	hsa-miR-7-5p	1/577	0.732548	0.741106	0.764639	0.237976	HAP1	Reg_of_neurogenesis
miR-9-5p	mmu-miR-9-5p	1/510	0.687665	0.700609	0.86828	0.325131	TBC1D24	Reg_of_neurogenesis
miR-98-5p	hsa-miR-98-5p	5/785	0.0307741	0.270679	3.07292	10.6971	FZD3;E2F1;DISC1;FXN;EZH2	Reg_of_neurogenesis
let-7a-3p	hsa-let-7a-3p	1/123	0.386334	0.554781	2.0806	1.97876	GREM1	Reg_of_phosphate_metab_
let-7a-5p	hsa-let-7a-5p	2/639	0.723197	0.749287	0.786316	0.254824	FKBP8;EZH2	Reg_of_phosphate_metab_
let-7b-5p	mmu-let-7b-5p	3/333	0.144766	0.454515	2.34342	4.52898	PDGFRB;ERCC6;SRCIN1	Reg_of_phosphate_metab_
let-7b-5p	hsa-let-7b-5p	6/1214	0.346879	0.540412	1.27322	1.34806	SPN;MCM7;PLK1;MLLT1;ADNP;EZH2	Reg_of_phosphate_metab_
miR-100-5p	hsa-miR-100-5p	2/250	0.259589	0.518394	2.06043	2.77881	PLK1;PFN2	Reg_of_phosphate_metab_
miR-10a-5p	mmu-miR-10a-5p	1/219	0.581689	0.657381	1.15873	0.627822	ERCC6	Reg_of_phosphate_metab_
miR-10b-5p	mmu-miR-10b-5p	1/218	0.580011	0.656656	1.16413	0.634108	ERCC6	Reg_of_phosphate_metab_
miR-10b-5p	hsa-miR-10b-5p	1/322	0.723287	0.749287	0.78281	0.253591	APLNR	Reg_of_phosphate_metab_
miR-126-5p	hsa-miR-126-5p	3/119	0.0116987	0.25449	6.73945	29.9789	SEMA7A;TFRC;ERCC6	Reg_of_phosphate_metab_
miR-146a-5p	hsa-miR-146a-5p	2/201	0.188501	0.483336	2.57417	4.29539	L1CAM;SQSTM1	Reg_of_phosphate_metab_
miR-146b-5p	mmu-miR-146b-5p	45672	0.0576588	0.362214	18.2298	52.0136	SIRT1	Reg_of_phosphate_metab_
miR-146b-5p	hsa-miR-146b-5p	1/121	0.381427	0.553375	2.11549	2.03898	SQSTM1	Reg_of_phosphate_metab_
miR-155-5p	hsa-miR-155-5p	5/903	0.285083	0.518394	1.43133	1.79629	CAB39;CDK5;PLK1;AGRN;SIRT1	Reg_of_phosphate_metab_
miR-16-5p	hsa-miR-16-5p	12/1555	0.0185516	0.28687	2.13323	8.50564	MAP4K2;TFRC;PLK1;APLNR;MLLT1;CLSPN;PLPP3;L1CAM;AGRN;CBFA2T3;SQSTM1;OGT	Reg_of_phosphate_metab_
miR-16-5p	mmu-miR-16-5p	15342	0.153292	0.456747	6.21638	11.6583	CD40	Reg_of_phosphate_metab_
miR-17-5p	mmu-miR-17-5p	7/402	0.00105185	0.190535	4.80598	32.9556	MAP4K2;MCM7;PLPP3;SRCIN1;SQSTM1;MAP3K5;PFN2	Reg_of_phosphate_metab_
miR-17-5p	hsa-miR-17-5p	6/1181	0.323483	0.540412	1.31129	1.47994	SEMA7A;STIL;IGFBP3;MLLT1;NPNT;SQSTM1	Reg_of_phosphate_metab_
miR-195-5p	hsa-miR-195-5p	6/639	0.0405844	0.349864	2.50445	8.02518	MAP4K2;CAB39;CLSPN;PLPP3;CBFA2T3;OGT	Reg_of_phosphate_metab_
miR-195a-5p	mmu-miR-195a-5p	13150	0.132905	0.447011	7.28425	14.7005	SIRT1	Reg_of_phosphate_metab_
miR-19b-3p	mmu-miR-19b-3p	4/310	0.0343757	0.321588	3.41874	11.5225	IGFBP3;ERCC6;NPNT;PLPP3	Reg_of_phosphate_metab_
miR-19b-3p	hsa-miR-19b-3p	5/713	0.151086	0.456747	1.83358	3.4653	ABCA2;SLC27A1;CAB39;LRP8;PFN2	Reg_of_phosphate_metab_
miR-20a-5p	mmu-miR-20a-5p	16438	0.163307	0.470621	5.79167	10.4952	SQSTM1	Reg_of_phosphate_metab_
miR-20a-5p	hsa-miR-20a-5p	6/1071	0.247999	0.518394	1.45522	2.02906	SEMA7A;STIL;MLLT1;NPNT;SQSTM1;MAP3K5	Reg_of_phosphate_metab_
miR-21-5p	hsa-miR-21-5p	4/611	0.22189	0.50919	1.697	2.55496	TGFB2;ADNP;MMP9;DDR2	Reg_of_phosphate_metab_
miR-21a-5p	mmu-miR-21a-5p	12785	0.12946	0.446074	7.49887	15.3306	MMP9	Reg_of_phosphate_metab_
miR-22-3p	hsa-miR-22-3p	3/163	0.0267744	0.315534	4.87525	17.6499	TFRC;PLK1;SIRT1	Reg_of_phosphate_metab_
miR-22-3p	mmu-miR-22-3p	45681	0.0906654	0.415599	11.0914	26.6258	SIRT1	Reg_of_phosphate_metab_
miR-222-3p	hsa-miR-222-3p	2/394	0.463005	0.585335	1.294	0.996399	CDKN1C;MCM7	Reg_of_phosphate_metab_
miR-224-5p	hsa-miR-224-5p	3/132	0.0154352	0.260958	6.0563	25.2615	PDGFRB;CD40;EDNRA	Reg_of_phosphate_metab_
miR-26b-5p	hsa-miR-26b-5p	9/1872	0.319115	0.539591	1.24624	1.42346	C3;STIL;GPNMB;AMDHD2;ADNP;PKN1;L1CAM;PFN2;EZH2	Reg_of_phosphate_metab_
miR-30c-5p	hsa-miR-30c-5p	1/520	0.875728	0.877112	0.479275	0.0635994	DDR2	Reg_of_phosphate_metab_
miR-344d-3p	mmu-miR-344d-3p	1/146	0.440074	0.575865	1.74854	1.43523	IGFBP3	Reg_of_phosphate_metab_
miR-503-3p	hsa-miR-503-3p	18264	0.17974	0.483336	5.19937	8.92339	L1CAM	Reg_of_phosphate_metab_
miR-7-5p	hsa-miR-7-5p	5/577	0.0780272	0.395548	2.2856	5.82988	TFRC;GFRA1;PLPP3;SQSTM1;PFN2	Reg_of_phosphate_metab_
miR-9-5p	hsa-miR-9-5p	5/351	0.0126553	0.25449	3.82265	16.7037	PDGFRB;TFRC;ZC3H12A;SIRT1;MMP9	Reg_of_phosphate_metab_
miR-9-5p	mmu-miR-9-5p	2/510	0.601957	0.667083	0.992586	0.503806	SIRT1;SRCIN1	Reg_of_phosphate_metab_
miR-98-5p	hsa-miR-98-5p	4/785	0.375781	0.552323	1.30704	1.27927	C3;PLPP3;IP6K2;EZH2	Reg_of_phosphate_metab_
let-7a-5p	hsa-let-7a-5p	1/639	0.803206	0.826125	0.617747	0.135376	HOXA6	Skeletal_system_dev_
let-7b-5p	mmu-let-7b-5p	1/333	0.568525	0.684128	1.20593	0.680998	PDGFRB	Skeletal_system_dev_
let-7b-5p	hsa-let-7b-5p	2/1214	0.815575	0.835595	0.644183	0.131325	RAI1;COL3A1	Skeletal_system_dev_
miR-10a-5p	hsa-miR-10a-5p	1/463	0.690426	0.745924	0.860853	0.3189	MMP14	Skeletal_system_dev_
miR-126-5p	hsa-miR-126-5p	1/119	0.258259	0.514036	3.42996	4.64345	HOXB6	Skeletal_system_dev_
miR-155-5p	hsa-miR-155-5p	1/903	0.90103	0.90523	0.43097	0.0449143	HSD17B7	Skeletal_system_dev_
miR-16-5p	hsa-miR-16-5p	4/1555	0.551689	0.672027	1.03154	0.613528	ACP2;TGFBI;PHEX;SOX5	Skeletal_system_dev_
miR-17-5p	mmu-miR-17-5p	1/402	0.638139	0.718812	0.994911	0.446914	TBX3	Skeletal_system_dev_
miR-17-5p	hsa-miR-17-5p	1/1181	0.952502	0.953705	0.324628	0.0157972	MMP2	Skeletal_system_dev_
miR-195a-5p	mmu-miR-195a-5p	13150	0.0862437	0.438406	11.6122	28.4567	MMP2	Skeletal_system_dev_
miR-20a-5p	mmu-miR-20a-5p	16438	0.106639	0.464642	9.23284	20.6659	TBX3	Skeletal_system_dev_
miR-21-5p	hsa-miR-21-5p	6/611	0.00402463	0.176588	4.36026	24.0482	TGFB2;MMP2;TGFBI;MMP9;SOX5;DDR2	Skeletal_system_dev_
miR-21a-5p	mmu-miR-21a-5p	12844	9.09461e-05	0.0240401	39.73	369.698	TGFBI;MMP9;SOX5	Skeletal_system_dev_
miR-22-3p	hsa-miR-22-3p	2/163	0.0627089	0.406472	5.12138	14.1824	MMP14;TBX3	Skeletal_system_dev_
miR-222-3p	hsa-miR-222-3p	2/394	0.258639	0.514036	2.07887	2.8113	CDKN1C;SERPINH1	Skeletal_system_dev_
miR-224-5p	hsa-miR-224-5p	2/132	0.0431023	0.365941	6.35256	19.9736	PDGFRB;EDNRA	Skeletal_system_dev_
miR-26b-5p	hsa-miR-26b-5p	3/1872	0.859108	0.873426	0.617499	0.093774	SERPINH1;TGFBI;SOX5	Skeletal_system_dev_
miR-30c-5p	hsa-miR-30c-5p	1/520	0.732553	0.768527	0.764067	0.237793	DDR2	Skeletal_system_dev_
miR-344d-3p	mmu-miR-344d-3p	2/146	0.0516255	0.369657	5.7309	16.9849	DLX3;SOX11	Skeletal_system_dev_
miR-9-5p	hsa-miR-9-5p	6/351	0.000231988	0.029125	7.74901	64.8501	PDGFRB;FBN2;MMP2;SERPINH1;TGFBI;MMP9	Skeletal_system_dev_

## Sheet: S8. SVR miRNA Target genes
Supplemental Table S8. Predicted miRNA regulated genes in top downregulated pathways for miRNAs with increased abundance in SVR cells treated with 100µM ENX.
miRNA	Term	Overlap	P.value	Adjusted.P.value	Odds.Ratio	Combined.Score	Genes	GO_Term
miR-155-5p	hsa-miR-155-5p	11/903	0.000247511	0.0509461	4.04803	33.6151	FMNL3;JUN;FLT1;COL4A2;PDCD10;MCAM;S1PR1;CDH13;CCL2;CTNNB1;SMAD5	Angiogenesis
miR-9-5p	mmu-miR-9-5p	8/510	0.000361422	0.0540563	5.07583	40.2283	FLT1;COL4A2;COL4A1;EPAS1;PXDN;CXCR4;CTNNB1;TGFBR2	Angiogenesis
miR-126-3p	hsa-miR-126-3p	3/58	0.00105862	0.084247	16.4264	112.534	EGFL7;CXCR4;TEK	Angiogenesis
miR-9-5p	hsa-miR-9-5p	6/351	0.00132449	0.084247	5.40676	35.8292	ZC3H12A;PXDN;CXCR4;TGFBI;E2F7;TGFBR2	Angiogenesis
miR-26b-5p	hsa-miR-26b-5p	15/1872	0.00153828	0.0904652	2.70358	17.5114	NUS1;JUN;SLC31A1;PDGFB;CXCR4;TSPAN12;RASIP1;LOXL2;CDH5;COL4A2;PDCD10;CCL2;TGFBI;HPSE;E2F7	Angiogenesis
miR-27b-3p	hsa-miR-27b-3p	6/421	0.00329185	0.144219	4.47871	25.6017	CDH5;NUS1;CYP1B1;HOXB3;TGFBR1;E2F7	Angiogenesis
miR-200b-3p	mmu-miR-200b-3p	2/30	0.00479404	0.162925	21.2186	113.315	JUN;FLT1	Angiogenesis
miR-98-5p	hsa-miR-98-5p	8/785	0.00549186	0.164108	3.23295	16.8258	FMNL3;SLC31A1;PXDN;PDGFB;COL8A1;CCL2;ACKR3;TGFBR1	Angiogenesis
miR-21a-5p	mmu-miR-21a-5p	2/35	0.006485	0.177977	17.9991	90.6842	PDCD10;TGFBI	Angiogenesis
miR-128-3p	hsa-miR-128-3p	6/527	0.00960649	0.223898	3.54812	16.4821	CDH5;NUS1;HOXB3;TGFBR1;E2F7;LOXL2	Angiogenesis
miR-224-5p	hsa-miR-224-5p	3/132	0.0107238	0.223898	6.97745	31.6447	HOXB3;CXCR4;APLN	Angiogenesis
miR-100-5p	hsa-miR-100-5p	4/250	0.010924	0.223898	4.92433	22.2422	FLT1;COL4A1;ACKR3;SAT1	Angiogenesis
miR-21-5p	hsa-miR-21-5p	6/611	0.0187231	0.273608	3.04227	12.1021	COL4A1;SLC31A1;TGFBI;APOLD1;TGFBR2;RHOB	Angiogenesis
miR-10a-5p	hsa-miR-10a-5p	5/463	0.0217857	0.275116	3.32168	12.7104	MMP14;RNF213;COL4A2;HOXB3;E2F7	Angiogenesis
let-7c-5p	hsa-let-7c-5p	5/516	0.0326921	0.303014	2.96906	10.156	FMNL3;PDGFB;COL8A1;TGFBR1;RHOB	Angiogenesis
let-7f-5p	hsa-let-7f-5p	4/397	0.0482758	0.333076	3.05939	9.27246	FMNL3;PDGFB;COL8A1;TGFBR1	Angiogenesis
miR-26b-5p	mmu-miR-26b-5p	1/20	0.0668151	0.386146	15.4118	41.7016	NUS1	Angiogenesis
miR-23b-3p	mmu-miR-23b-3p	1/26	0.0859875	0.405323	11.7094	28.7297	SMAD5	Angiogenesis
miR-27b-3p	mmu-miR-27b-3p	1/30	0.0985529	0.428566	10.0923	23.3855	SMAD5	Angiogenesis
miR-23b-5p	hsa-miR-23b-5p	2/155	0.100091	0.432213	3.85875	8.88156	HPSE;TGFBR2	Angiogenesis
miR-206-3p	mmu-miR-206-3p	1/34	0.110948	0.451176	8.8672	19.4963	PDCD10	Angiogenesis
miR-200b-3p	hsa-miR-200b-3p	2/186	0.135028	0.478178	3.2036	6.41449	JUN;FLT1	Angiogenesis
miR-146a-5p	hsa-miR-146a-5p	2/201	0.152798	0.478737	2.95987	5.56053	CFH;CXCR4	Angiogenesis
miR-155-5p	mmu-miR-155-5p	1/80	0.241964	0.497519	3.69546	5.24372	S1PR1	Angiogenesis
let-7e-5p	hsa-let-7e-5p	3/612	0.353933	0.540975	1.44216	1.49789	FMNL3;PDGFB;COL8A1	Angiogenesis
let-7a-5p	hsa-let-7a-5p	3/639	0.379462	0.550007	1.379	1.33625	FMNL3;PDGFB;COL8A1	Angiogenesis
miR-22-3p	hsa-miR-22-3p	1/163	0.431992	0.574903	1.79457	1.50627	MMP14	Angiogenesis
miR-10b-5p	hsa-miR-10b-5p	1/322	0.674327	0.724799	0.898387	0.354001	HOXB3	Angiogenesis
miR-27b-3p	hsa-miR-27b-3p	10/421	0.00107028	0.0984458	3.47842	23.7918	SEMA6A;ARL6IP1;BNIP3;MKNK2;CYP1B1;ADAR;TGFBR1;IER3;PDK1;ZFP36L1	Apoptotic_process
miR-21-5p	hsa-miR-21-5p	12/611	0.00177465	0.135852	2.87868	18.234	TOP2A;DAXX;MEF2C;CEBPB;MKNK2;E2F2;BNIP2;FAS;MYD88;TLR3;TGFBR2;RHOB	Apoptotic_process
miR-98-5p	hsa-miR-98-5p	14/785	0.00184551	0.135852	2.6251	16.525	DIDO1;EGLN3;IGF1;TGFBR1;ZFP36L1;IL6;CASP3;MKNK2;TNFSF10;E2F2;FAS;PPARGC1A;S100A8;IER3	Apoptotic_process
miR-206-3p	mmu-miR-206-3p	3/34	0.00193194	0.135852	13.4151	83.8339	PDCD10;ID1;PIM1	Apoptotic_process
let-7c-5p	hsa-let-7c-5p	9/516	0.0136001	0.291918	2.50685	10.7736	MEF2C;IL6;CEBPB;ARL6IP1;CASP3;ID1;RNF7;TGFBR1;RHOB	Apoptotic_process
miR-9-5p	hsa-miR-9-5p	7/351	0.0147215	0.301624	2.85616	12.0485	IL6;TNFAIP8;BCL2L11;BIK;ZC3H12A;ITGB3BP;TGFBR2	Apoptotic_process
miR-155-5p	hsa-miR-155-5p	13/903	0.0150614	0.304298	2.08272	8.73831	JUN;CEBPB;MLH1;IL6;CDK5;PDCD10;CASP3;E2F2;CTNNB1;AGRN;IKBKE;MYD88;PDK1	Apoptotic_process
miR-224-5p	hsa-miR-224-5p	4/132	0.0160375	0.3143	4.34111	17.9411	DIDO1;CASP7;CASP3;ITGB3BP	Apoptotic_process
miR-200b-3p	hsa-miR-200b-3p	4/186	0.047614	0.42619	3.04473	9.27007	KLF11;JUN;BCL2L11;MKNK2	Apoptotic_process
miR-128-3p	hsa-miR-128-3p	7/527	0.091828	0.481863	1.87241	4.47102	CASP3;MKNK2;BAX;IGF1;TGFBR1;PDK1;ZFP36L1	Apoptotic_process
miR-98-5p	mmu-miR-98-5p	1/15	0.104112	0.489953	9.7734	22.1102	IL6	Apoptotic_process
miR-23b-5p	hsa-miR-23b-5p	3/155	0.104643	0.489953	2.71927	6.13792	E2F2;NFKBID;TGFBR2	Apoptotic_process
miR-155-5p	mmu-miR-155-5p	2/80	0.115884	0.494682	3.52137	7.58913	CEBPB;IKBKE	Apoptotic_process
let-7a-5p	mmu-let-7a-5p	1/18	0.123605	0.500807	8.04746	16.8246	IL6	Apoptotic_process
miR-26b-5p	hsa-miR-26b-5p	18/1872	0.138061	0.524074	1.36529	2.70336	MEF2C;BRSK2;TIA1;JUN;IGF1;POU4F1;PIDD1;CASP7;PDCD10;CASP3;BCL3;ID1;C1D;TNFSF10;PIM1;CD28;SKIL;PDK1	Apoptotic_process
miR-16-1-3p	hsa-miR-16-1-3p	2/100	0.1657	0.552668	2.79989	5.03301	BCL2L11;E2F2	Apoptotic_process
miR-23b-3p	mmu-miR-23b-3p	1/26	0.17355	0.556712	5.47007	9.57969	FAS	Apoptotic_process
miR-146a-5p	hsa-miR-146a-5p	3/201	0.181821	0.568417	2.08264	3.55035	IL6;CASP7;FAS	Apoptotic_process
miR-27b-3p	mmu-miR-27b-3p	1/30	0.197451	0.575129	4.71463	7.64836	MEF2C	Apoptotic_process
miR-200b-3p	mmu-miR-200b-3p	1/30	0.197451	0.575129	4.71463	7.64836	JUN	Apoptotic_process
miR-146a-5p	mmu-miR-146a-5p	1/33	0.214926	0.58982	4.27198	6.56801	IL6	Apoptotic_process
miR-21a-5p	mmu-miR-21a-5p	1/35	0.226365	0.597624	4.02028	5.97255	PDCD10	Apoptotic_process
let-7a-5p	hsa-let-7a-5p	6/639	0.324225	0.655705	1.30135	1.46574	IL6;BCL2L11;CASP3;FKBP8;E2F2;ZFP36L1	Apoptotic_process
miR-128-3p	mmu-miR-128-3p	1/55	0.332035	0.655705	2.52874	2.78797	IRF1	Apoptotic_process
miR-22-3p	hsa-miR-22-3p	2/163	0.33424	0.657805	1.69884	1.86176	CYCS;E2F2	Apoptotic_process
miR-23b-3p	hsa-miR-23b-3p	3/322	0.418404	0.672274	1.28472	1.11938	TNFAIP8;ARL6IP1;HMGB2	Apoptotic_process
miR-10a-5p	hsa-miR-10a-5p	4/463	0.438503	0.675189	1.19028	0.981251	BCL2L11;TUBA1A;MKNK2;BIRC5	Apoptotic_process
let-7f-5p	hsa-let-7f-5p	3/397	0.556434	0.699277	1.03617	0.607411	IL6;ARL6IP1;TGFBR1	Apoptotic_process
miR-10b-5p	hsa-miR-10b-5p	2/322	0.684202	0.764615	0.84783	0.321753	BCL2L11;MKNK2	Apoptotic_process
miR-9-5p	mmu-miR-9-5p	3/510	0.723209	0.786932	0.800554	0.259425	BCL2L11;CTNNB1;TGFBR2	Apoptotic_process
miR-10a-5p	mmu-miR-10a-5p	1/219	0.800791	0.830515	0.621196	0.138002	BCL2L11	Apoptotic_process
miR-100-5p	hsa-miR-100-5p	1/250	0.841694	0.862258	0.543	0.0935797	ID1	Apoptotic_process
let-7e-5p	hsa-let-7e-5p	2/612	0.940612	0.942179	0.43816	0.0268263	SPN;IGF1	Apoptotic_process
miR-126-3p	hsa-miR-126-3p	4/58	0.000103347	0.0183939	18.3907	168.78	EGFL7;CXCR4;ADM;TEK	Blood_vessel_morph_
miR-98-5p	hsa-miR-98-5p	12/785	0.00010362	0.0183939	4.12743	37.8682	FMNL3;SLC31A1;HEG1;PXDN;PDGFB;COL8A1;CCL2;ACKR3;SOX4;TGFBR1;ZFP36L1;WARS2	Blood_vessel_morph_
miR-9-5p	hsa-miR-9-5p	8/351	0.000113557	0.0183939	6.00675	54.5605	ZC3H12A;PXDN;CXCR4;HES1;PRDM1;TGFBI;E2F7;TGFBR2	Blood_vessel_morph_
miR-9-5p	mmu-miR-9-5p	9/510	0.000286793	0.0331118	4.6503	37.9313	FLT1;COL4A2;COL4A1;EPAS1;PXDN;CXCR4;CTNNB1;HES1;TGFBR2	Blood_vessel_morph_
miR-128-3p	hsa-miR-128-3p	9/527	0.000364503	0.0331118	4.49375	35.5769	CDH5;NUS1;HOXB3;BAX;NR2F2;TGFBR1;E2F7;LOXL2;ZFP36L1	Blood_vessel_morph_
miR-155-5p	hsa-miR-155-5p	12/903	0.000376979	0.0331118	3.55874	28.0547	FMNL3;JUN;FLT1;COL4A2;PDCD10;MCAM;S1PR1;CDH13;CCL2;CTNNB1;JUNB;SMAD5	Blood_vessel_morph_
miR-27b-3p	hsa-miR-27b-3p	8/421	0.000389129	0.0331118	4.97082	39.0289	CDH5;NUS1;CYP1B1;HOXB3;NR2F2;TGFBR1;E2F7;ZFP36L1	Blood_vessel_morph_
miR-26b-5p	hsa-miR-26b-5p	16/1872	0.0045131	0.12232	2.28955	12.3654	NUS1;JUN;SLC31A1;PDGFB;CXCR4;ADM;TSPAN12;RASIP1;LOXL2;CDH5;COL4A2;PDCD10;CCL2;TGFBI;HPSE;E2F7	Blood_vessel_morph_
miR-23b-3p	mmu-miR-23b-3p	2/26	0.00530598	0.126705	20.2154	105.907	HES1;SMAD5	Blood_vessel_morph_
miR-27b-3p	mmu-miR-27b-3p	2/30	0.00702513	0.135444	17.324	85.8971	SMAD5;WARS2	Blood_vessel_morph_
miR-200b-3p	mmu-miR-200b-3p	2/30	0.00702513	0.135444	17.324	85.8971	JUN;FLT1	Blood_vessel_morph_
miR-21a-5p	mmu-miR-21a-5p	2/35	0.00947968	0.157559	14.6955	68.4605	PDCD10;TGFBI	Blood_vessel_morph_
miR-224-5p	hsa-miR-224-5p	3/132	0.018163	0.228989	5.68102	22.7716	HOXB3;CXCR4;APLN	Blood_vessel_morph_
miR-100-5p	hsa-miR-100-5p	4/250	0.0211122	0.244226	3.99797	15.4238	FLT1;COL4A1;ACKR3;SAT1	Blood_vessel_morph_
let-7f-5p	hsa-let-7f-5p	5/397	0.0258849	0.254623	3.15229	11.5188	FMNL3;PDGFB;COL8A1;PRDM1;TGFBR1	Blood_vessel_morph_
miR-23b-5p	hsa-miR-23b-5p	3/155	0.0275612	0.260481	4.81579	17.2952	GJC1;HPSE;TGFBR2	Blood_vessel_morph_
miR-21-5p	hsa-miR-21-5p	6/611	0.043554	0.295768	2.45531	7.69433	COL4A1;SLC31A1;TGFBI;APOLD1;TGFBR2;RHOB	Blood_vessel_morph_
miR-10a-5p	hsa-miR-10a-5p	5/463	0.0453806	0.295768	2.68891	8.3159	MMP14;RNF213;COL4A2;HOXB3;E2F7	Blood_vessel_morph_
miR-224-5p	mmu-miR-224-5p	1/15	0.0612016	0.331982	17.1274	47.8467	WARS2	Blood_vessel_morph_
let-7c-5p	hsa-let-7c-5p	5/516	0.066065	0.343633	2.40345	6.53046	FMNL3;PDGFB;COL8A1;TGFBR1;RHOB	Blood_vessel_morph_
miR-26b-5p	mmu-miR-26b-5p	1/20	0.0807679	0.358253	12.617	31.7466	NUS1	Blood_vessel_morph_
miR-146a-5p	mmu-miR-146a-5p	1/33	0.129775	0.447861	7.48645	15.287	HES1	Blood_vessel_morph_
let-7a-5p	hsa-let-7a-5p	5/639	0.131084	0.449762	1.92489	3.91121	FMNL3;PDGFB;COL8A1;PRDM1;ZFP36L1	Blood_vessel_morph_
miR-206-3p	mmu-miR-206-3p	1/34	0.133436	0.449762	7.25922	14.6211	PDCD10	Blood_vessel_morph_
miR-200b-3p	hsa-miR-200b-3p	2/186	0.183923	0.487085	2.61559	4.42881	JUN;FLT1	Blood_vessel_morph_
miR-146a-5p	hsa-miR-146a-5p	2/201	0.206758	0.492161	2.4166	3.80905	CFH;CXCR4	Blood_vessel_morph_
miR-128-3p	mmu-miR-128-3p	1/55	0.206895	0.492161	4.4315	6.98203	WARS2	Blood_vessel_morph_
miR-155-5p	mmu-miR-155-5p	1/80	0.286359	0.514151	3.02532	3.78319	S1PR1	Blood_vessel_morph_
let-7e-5p	hsa-let-7e-5p	3/612	0.476644	0.614832	1.17418	0.870049	FMNL3;PDGFB;COL8A1	Blood_vessel_morph_
miR-22-3p	hsa-miR-22-3p	1/163	0.497842	0.623812	1.46914	1.02468	MMP14	Blood_vessel_morph_
miR-10b-5p	hsa-miR-10b-5p	1/322	0.744941	0.781135	0.735465	0.216558	HOXB3	Blood_vessel_morph_
miR-27b-3p	hsa-miR-27b-3p	10/421	0.00138119	0.124928	3.35421	22.0869	SEMA6A;ARL6IP1;BNIP3;MKNK2;CYP1B1;ADAR;TGFBR1;IER3;PDK1;ZFP36L1	Cell_death
miR-206-3p	mmu-miR-206-3p	3/34	0.00212644	0.161275	12.9586	79.7382	PDCD10;ID1;PIM1	Cell_death
miR-21-5p	hsa-miR-21-5p	12/611	0.00235514	0.161275	2.77441	16.7884	TOP2A;DAXX;MEF2C;CEBPB;MKNK2;E2F2;BNIP2;FAS;MYD88;TLR3;TGFBR2;RHOB	Cell_death
miR-98-5p	hsa-miR-98-5p	14/785	0.00252784	0.161275	2.52863	15.1222	DIDO1;EGLN3;IGF1;TGFBR1;ZFP36L1;IL6;CASP3;MKNK2;TNFSF10;E2F2;FAS;PPARGC1A;S100A8;IER3	Cell_death
let-7c-5p	hsa-let-7c-5p	9/516	0.0166175	0.349548	2.41795	9.90706	MEF2C;IL6;CEBPB;ARL6IP1;CASP3;ID1;RNF7;TGFBR1;RHOB	Cell_death
miR-9-5p	hsa-miR-9-5p	7/351	0.017406	0.353791	2.75628	11.1655	IL6;TNFAIP8;BCL2L11;BIK;ZC3H12A;ITGB3BP;TGFBR2	Cell_death
miR-224-5p	hsa-miR-224-5p	4/132	0.0179224	0.36024	4.19239	16.8606	DIDO1;CASP7;CASP3;ITGB3BP	Cell_death
miR-155-5p	hsa-miR-155-5p	13/903	0.0194071	0.375215	2.00673	7.91077	JUN;CEBPB;MLH1;IL6;CDK5;PDCD10;CASP3;E2F2;CTNNB1;AGRN;IKBKE;MYD88;PDK1	Cell_death
miR-200b-3p	hsa-miR-200b-3p	4/186	0.0526819	0.467653	2.94042	8.65508	KLF11;JUN;BCL2L11;MKNK2	Cell_death
miR-128-3p	hsa-miR-128-3p	7/527	0.104893	0.521443	1.80693	4.07429	CASP3;MKNK2;BAX;IGF1;TGFBR1;PDK1;ZFP36L1	Cell_death
miR-98-5p	mmu-miR-98-5p	1/15	0.107492	0.521443	9.44524	21.0661	IL6	Cell_death
miR-23b-5p	hsa-miR-23b-5p	3/155	0.112761	0.521443	2.62673	5.7328	E2F2;NFKBID;TGFBR2	Cell_death
miR-26b-5p	hsa-miR-26b-5p	19/1872	0.113068	0.521443	1.39791	3.04712	MEF2C;BRSK2;TIA1;JUN;IGF1;POU4F1;PIDD1;CASP7;PDCD10;CASP3;BCL3;ID1;CASP4;C1D;TNFSF10;PIM1;CD28;SKIL;PDK1	Cell_death
miR-155-5p	mmu-miR-155-5p	2/80	0.122453	0.521606	3.40234	7.14502	CEBPB;IKBKE	Cell_death
let-7a-5p	mmu-let-7a-5p	1/18	0.127571	0.522116	7.77725	16.014	IL6	Cell_death
miR-16-1-3p	hsa-miR-16-1-3p	2/100	0.174572	0.581368	2.70525	4.72178	BCL2L11;E2F2	Cell_death
miR-23b-3p	mmu-miR-23b-3p	1/26	0.178947	0.581368	5.2864	9.09612	FAS	Cell_death
miR-146a-5p	hsa-miR-146a-5p	3/201	0.194476	0.598748	2.01177	3.29417	IL6;CASP7;FAS	Cell_death
miR-27b-3p	mmu-miR-27b-3p	1/30	0.203497	0.598748	4.55632	7.25414	MEF2C	Cell_death
miR-200b-3p	mmu-miR-200b-3p	1/30	0.203497	0.598748	4.55632	7.25414	JUN	Cell_death
miR-146a-5p	mmu-miR-146a-5p	1/33	0.22143	0.613764	4.12854	6.2244	IL6	Cell_death
miR-21a-5p	mmu-miR-21a-5p	1/35	0.233161	0.625799	3.88529	5.65709	PDCD10	Cell_death
miR-128-3p	mmu-miR-128-3p	1/55	0.341236	0.678348	2.44383	2.62755	IRF1	Cell_death
miR-22-3p	hsa-miR-22-3p	2/163	0.349062	0.681005	1.64142	1.7276	CYCS;E2F2	Cell_death
let-7a-5p	hsa-let-7a-5p	6/639	0.352608	0.681005	1.25615	1.30941	IL6;BCL2L11;CASP3;FKBP8;E2F2;ZFP36L1	Cell_death
miR-23b-3p	hsa-miR-23b-3p	3/322	0.439714	0.691642	1.241	1.01964	TNFAIP8;ARL6IP1;HMGB2	Cell_death
miR-10a-5p	hsa-miR-10a-5p	4/463	0.46407	0.691642	1.1495	0.882492	BCL2L11;TUBA1A;MKNK2;BIRC5	Cell_death
miR-10a-5p	mmu-miR-10a-5p	2/219	0.494073	0.702059	1.21436	0.856214	BCL2L11;PRF1	Cell_death
let-7f-5p	hsa-let-7f-5p	3/397	0.579297	0.721046	1.00091	0.546436	IL6;ARL6IP1;TGFBR1	Cell_death
miR-10b-5p	hsa-miR-10b-5p	2/322	0.701901	0.781378	0.819169	0.289956	BCL2L11;MKNK2	Cell_death
miR-9-5p	mmu-miR-9-5p	3/510	0.744022	0.805651	0.773309	0.228656	BCL2L11;CTNNB1;TGFBR2	Cell_death
miR-10b-5p	mmu-miR-10b-5p	1/218	0.810089	0.839855	0.603134	0.127026	PRF1	Cell_death
miR-100-5p	hsa-miR-100-5p	1/250	0.851414	0.871651	0.524766	0.0844121	ID1	Cell_death
let-7e-5p	hsa-let-7e-5p	2/612	0.947776	0.94935	0.423347	0.0227071	SPN;IGF1	Cell_death
miR-26b-5p	hsa-miR-26b-5p	12/1872	0.00015442	0.0165037	4.32521	37.9573	GINS1;WDHD1;PCNA;ORC6;LIG1;CCNE1;DSCC1;GMNN;PCLAF;DONSON;RECQL;TK1	Dna_replication
miR-16-1-3p	hsa-miR-16-1-3p	2/100	0.0162624	0.204476	10.9559	45.1261	PCNA;CCNE1	Dna_replication
miR-10b-5p	hsa-miR-10b-5p	3/322	0.0246505	0.232051	5.13114	19.0004	CHAF1B;ORC1;CDC6	Dna_replication
miR-335-5p	mmu-miR-335-5p	1/13	0.0250628	0.23292	43.7478	161.271	SAMHD1	Dna_replication
miR-10a-5p	hsa-miR-10a-5p	3/463	0.0610087	0.318067	3.53279	9.88029	CHAF1B;ORC1;CDC6	Dna_replication
miR-155-5p	hsa-miR-155-5p	4/903	0.0977642	0.361855	2.42326	5.63457	GEN1;MMS22L;CHAF1B;SAMHD1	Dna_replication
miR-126-3p	hsa-miR-126-3p	1/58	0.107181	0.361855	9.18929	20.5218	CCNE2	Dna_replication
let-7f-5p	hsa-let-7f-5p	2/397	0.181033	0.36509	2.67752	4.5761	PRIM2;DNA2	Dna_replication
miR-23b-5p	hsa-miR-23b-5p	1/155	0.26193	0.392207	3.38465	4.53435	CHAF1B	Dna_replication
let-7c-5p	hsa-let-7c-5p	2/516	0.266523	0.394252	2.04512	2.70424	PRIM2;DNA2	Dna_replication
miR-22-3p	hsa-miR-22-3p	1/163	0.273456	0.394275	3.21621	4.17018	GINS2	Dna_replication
miR-200b-3p	hsa-miR-200b-3p	1/186	0.305626	0.412812	2.81309	3.33461	CCNE2	Dna_replication
miR-146a-5p	hsa-miR-146a-5p	1/201	0.325854	0.427309	2.60013	2.91554	FANCM	Dna_replication
let-7e-5p	hsa-let-7e-5p	2/612	0.336114	0.431608	1.71475	1.8696	PRIM2;DNA2	Dna_replication
miR-10b-5p	mmu-miR-10b-5p	1/218	0.348085	0.438311	2.39437	2.5268	RMI2	Dna_replication
miR-10a-5p	mmu-miR-10a-5p	1/219	0.349371	0.438637	2.38327	2.5063	RMI2	Dna_replication
let-7a-5p	hsa-let-7a-5p	2/639	0.355441	0.441072	1.63978	1.69618	PRIM2;DNA2	Dna_replication
miR-98-5p	hsa-miR-98-5p	2/785	0.45609	0.501735	1.32394	1.03938	PRIM2;DNA2	Dna_replication
miR-23b-3p	hsa-miR-23b-3p	1/322	0.46933	0.507946	1.6101	1.21796	DONSON	Dna_replication
miR-27b-3p	hsa-miR-27b-3p	1/421	0.564173	0.578379	1.22437	0.700825	MMS22L	Dna_replication
miR-128-3p	hsa-miR-128-3p	1/527	0.647404	0.652749	0.972333	0.422755	MMS22L	Dna_replication
miR-26b-5p	hsa-miR-26b-5p	20/1872	0.00126193	0.0539308	2.34784	15.6721	GINS1;SLBP;DUT;PCNA;LIG1;CDCA3;DSCC1;DONSON;BRCA1;LMNB1;ORC6;RACGAP1;CCNE1;RPA3;TK1;DCTPP1;ASF1B;EZH2;MAD2L1;SPC25	E2F_targets
let-7e-5p	hsa-let-7e-5p	9/612	0.00433929	0.108416	3.06351	16.6656	PRIM2;RRM2;CDCA3;RACGAP1;SRSF2;RPA1;MKI67;SMC1A;EZH2	E2F_targets
miR-155-5p	hsa-miR-155-5p	11/903	0.00677933	0.138812	2.54746	12.7217	POLE4;MMS22L;WEE1;RRM2;SRSF1;SRSF2;LUC7L3;NCAPD2;KIF22;DEK;MLH1	E2F_targets
miR-10b-3p	hsa-miR-10b-3p	3/85	0.00965429	0.15552	7.24939	33.6397	MELK;SRSF2;LMNB1	E2F_targets
miR-16-1-3p	hsa-miR-16-1-3p	3/100	0.0149559	0.179696	6.12371	25.7358	PCNA;CCNE1;ANP32E	E2F_targets
miR-128-3p	hsa-miR-128-3p	7/527	0.0191951	0.179696	2.71713	10.7411	MMS22L;WEE1;SRSF1;ANP32E;NCAPD2;DCK;LMNB1	E2F_targets
miR-10b-5p	hsa-miR-10b-5p	5/322	0.0255493	0.2024	3.15136	11.5565	TCF19;TRA2B;SRSF1;ANP32E;BRCA1	E2F_targets
miR-23b-3p	hsa-miR-23b-3p	5/322	0.0255493	0.2024	3.15136	11.5565	CDC20;WEE1;HMGB2;DONSON;LMNB1	E2F_targets
miR-98-5p	hsa-miR-98-5p	8/785	0.0496452	0.261626	2.07221	6.22254	PRIM2;RRM2;SUV39H1;AK2;HMMR;SMC1A;CDC25A;EZH2	E2F_targets
let-7c-5p	mmu-let-7c-5p	1/16	0.0793208	0.308932	12.9948	32.9321	EZH2	E2F_targets
miR-146a-5p	hsa-miR-146a-5p	3/201	0.0854695	0.317626	2.9847	7.34115	BRCA1;KIF22;CDKN3	E2F_targets
miR-10a-5p	hsa-miR-10a-5p	5/463	0.0910483	0.326407	2.16547	5.18926	WEE1;TRA2B;SRSF1;ANP32E;BIRC5	E2F_targets
miR-23b-3p	mmu-miR-23b-3p	1/26	0.125698	0.380138	7.79294	16.1616	LMNB1	E2F_targets
let-7c-5p	hsa-let-7c-5p	5/516	0.127726	0.381299	1.93558	3.98317	PRIM2;RRM2;SMC1A;CDC25A;EZH2	E2F_targets
miR-27b-3p	hsa-miR-27b-3p	4/421	0.172254	0.427737	1.88746	3.31964	MMS22L;WEE1;SRSF1;HMGB3	E2F_targets
miR-22-3p	hsa-miR-22-3p	2/163	0.205052	0.458236	2.4274	3.8462	TFRC;BUB1B	E2F_targets
miR-21-5p	hsa-miR-21-5p	5/611	0.207187	0.458236	1.62415	2.55663	TOP2A;HMGB3;BRCA1;SMC1A;CDC25A	E2F_targets
let-7a-5p	hsa-let-7a-5p	5/639	0.233261	0.470285	1.55017	2.25642	PRIM2;RRM2;SRSF2;SMC1A;EZH2	E2F_targets
miR-200b-3p	hsa-miR-200b-3p	2/186	0.248632	0.480117	2.1215	2.95267	EZH2;LMNB1	E2F_targets
miR-126-3p	hsa-miR-126-3p	1/58	0.259108	0.484782	3.41245	4.60856	EZH2	E2F_targets
miR-9-5p	hsa-miR-9-5p	3/351	0.270814	0.488127	1.68526	2.20149	TFRC;STMN1;SRSF1	E2F_targets
let-7f-5p	hsa-let-7f-5p	3/397	0.335509	0.516332	1.485	1.62178	PRIM2;RRM2;SMC1A	E2F_targets
miR-100-5p	hsa-miR-100-5p	2/250	0.369635	0.53693	1.56891	1.56144	RRM2;USP1	E2F_targets
miR-23b-5p	hsa-miR-23b-5p	1/155	0.552203	0.62976	1.25688	0.746381	TIMELESS	E2F_targets
miR-10b-5p	mmu-miR-10b-5p	1/218	0.677536	0.71172	0.88913	0.346131	MCM5	E2F_targets
miR-10a-5p	mmu-miR-10a-5p	1/219	0.679215	0.713023	0.885006	0.342335	MCM5	E2F_targets
miR-9-5p	mmu-miR-9-5p	1/510	0.93057	0.931144	0.373435	0.0268715	STMN1	E2F_targets
miR-146a-5p	hsa-miR-146a-5p	13/201	4.33171e-07	0.00093175	6.45028	94.5103	IFITM3;CNOT6L;STAT1;UHRF1;LAMC2;NMI;SHCBP1;IFIT3;CCNA2;IL6;CCL5;FAS;TLR4	Reg_of_cell_proliferation
miR-26b-5p	hsa-miR-26b-5p	44/1872	1.50523e-06	0.00161887	2.41359	32.358	IFITM3;BTG2;PDGFB;ADM;ARRB1;HMGB1;RASIP1;PLAC8;PPP1CC;CDH5;P2RY6;ZNHIT1;GPNMB;PDCD10;ADAMTS1;FTH1;CASP3;MED31;GCNT2;PIM1;CCL2;FBXO5;IER5;XDH;E2F7;ARNT2;SMAD1;MEF2C;JUN;GKN1;IGF1;KAT2B;BMP2;RGCC;CCNE1;GPR183;ID1;CD28;TAX1BP3;HPSE;TRIB1;SRSF6;TLR4;ATF3	Reg_of_cell_proliferation
miR-98-5p	hsa-miR-98-5p	24/785	7.9776e-06	0.00307592	3.01365	35.3768	EGLN3;MARCKSL1;STAT2;ITGB3;PDGFB;ARRB1;IGF1;OSMR;SYNJ2BP;CDC25A;TGFBR1;ZFP36L1;CCNA2;IL6;CASP3;CCL5;GCNT2;FAS;CCL2;ACKR3;TRIB1;PPARGC1A;FXN;SOX4	Reg_of_cell_proliferation
miR-9-5p	hsa-miR-9-5p	13/351	0.00016685	0.0256353	3.56026	30.9686	TFRC;UHRF1;PRDM1;ETS1;TGFBR2;CNOT6;IL6;NOX4;MALAT1;HES1;SOX7;ITGB3BP;E2F7	Reg_of_cell_proliferation
let-7c-5p	hsa-let-7c-5p	14/516	0.00203513	0.135435	2.57201	15.9392	MEF2C;CEBPB;MARCKSL1;DHX9;STAT2;ITGB3;PDGFB;SYNJ2BP;CDC25A;TGFBR1;IL6;CASP3;ID1;FXN	Reg_of_cell_proliferation
miR-100-5p	hsa-miR-100-5p	9/250	0.00203528	0.135435	3.40916	21.127	FLT1;ID1;ODC1;ACKR3;HMGB1;TRIB1;SAT1;FXN;IFIT3	Reg_of_cell_proliferation
miR-23b-3p	mmu-miR-23b-3p	3/26	0.00294244	0.150695	11.7119	68.2628	FAS;NOX4;HES1	Reg_of_cell_proliferation
miR-224-5p	hsa-miR-224-5p	6/132	0.00366897	0.157839	4.31227	24.1825	CD40;CASP3;TXNIP;TRIB1;ITGB3BP;APLN	Reg_of_cell_proliferation
miR-126-3p	hsa-miR-126-3p	4/58	0.0039866	0.160728	6.67106	36.8564	NFKBIA;EGFL7;ADM;TEK	Reg_of_cell_proliferation
miR-200b-3p	hsa-miR-200b-3p	7/186	0.00494871	0.180418	3.54816	18.8359	CD274;KLF11;JUN;FLT1;MALAT1;ETS1;SHCBP1	Reg_of_cell_proliferation
let-7a-5p	hsa-let-7a-5p	15/639	0.00552774	0.184397	2.2135	11.5057	MARCKSL1;DHX9;UHRF1;STAT2;ITGB3;PDGFB;CDC7;PRDM1;SYNJ2BP;ZFP36L1;MAPK11;IL6;CASP3;CCR7;FXN	Reg_of_cell_proliferation
miR-146a-5p	mmu-miR-146a-5p	3/33	0.00583135	0.184397	8.97591	46.1766	IL6;STAT1;HES1	Reg_of_cell_proliferation
miR-10a-5p	hsa-miR-10a-5p	12/463	0.00596991	0.184397	2.43705	12.4802	CNOT6;SPARC;ORC1;UHRF1;BIRC5;CDC6;NOD2;WDR13;ETS1;AGER;HSPA1B;E2F7	Reg_of_cell_proliferation
miR-155-5p	hsa-miR-155-5p	19/903	0.00610414	0.184397	1.99055	10.1494	SMAD1;JUN;CEBPB;FLT1;STAT1;DHCR24;ETS1;SDCBP;CNOT6;IL6;PDCD10;CD109;CASP3;S1PR1;CTNNB1;CDH13;CCL2;JUNB;MYD88	Reg_of_cell_proliferation
miR-206-3p	mmu-miR-206-3p	3/34	0.00634374	0.184397	8.68592	43.9533	PDCD10;ID1;PIM1	Reg_of_cell_proliferation
miR-22-3p	hsa-miR-22-3p	6/163	0.010029	0.234514	3.45534	15.9024	CCNA2;TFRC;MALAT1;LGALS9;HMGB1;HSPA1B	Reg_of_cell_proliferation
miR-155-5p	mmu-miR-155-5p	4/80	0.0122995	0.234514	4.73468	20.824	SDCBP;CEBPB;S1PR1;ETS1	Reg_of_cell_proliferation
miR-128-3p	hsa-miR-128-3p	12/527	0.0155348	0.237726	2.12712	8.85878	CDH5;MARCKSL1;CSF1;CASP3;GCNT2;TXNIP;BAX;NR2F2;IGF1;TGFBR1;E2F7;ZFP36L1	Reg_of_cell_proliferation
miR-21-5p	hsa-miR-21-5p	13/611	0.0199466	0.271481	1.9854	7.77226	MEF2C;BTG2;CEBPB;HMGB1;PBX1;CDC25A;TGFBR2;CXCL10;FAS;CCR7;SKP2;TLR4;MYD88	Reg_of_cell_proliferation
miR-27b-3p	hsa-miR-27b-3p	10/421	0.0201358	0.271481	2.21217	8.63909	CCNA2;CDH5;BTG2;PLA2G2D;CYP1B1;TXNIP;NR2F2;TGFBR1;E2F7;ZFP36L1	Reg_of_cell_proliferation
miR-200b-3p	mmu-miR-200b-3p	2/30	0.0438819	0.358898	6.383	19.9549	JUN;FLT1	Reg_of_cell_proliferation
let-7f-5p	hsa-let-7f-5p	8/397	0.0774852	0.440928	1.85453	4.74328	IL6;MARCKSL1;STAT2;PDGFB;PRDM1;SYNJ2BP;FXN;TGFBR1	Reg_of_cell_proliferation
let-7e-5p	hsa-let-7e-5p	11/612	0.0820878	0.454896	1.65554	4.1388	SPN;ARNT2;MARCKSL1;MYCN;STAT2;PDGFB;DGCR8;IGF1;HMGB1;SYNJ2BP;FXN	Reg_of_cell_proliferation
miR-9-5p	mmu-miR-9-5p	9/510	0.118176	0.486528	1.61811	3.45561	BMP2;MYCN;FLT1;FLT3;STAT2;CTNNB1;DHCR24;HES1;TGFBR2	Reg_of_cell_proliferation
miR-128-3p	mmu-miR-128-3p	2/55	0.125373	0.486528	3.36788	6.99329	IRF1;SOX7	Reg_of_cell_proliferation
miR-10b-5p	hsa-miR-10b-5p	6/322	0.15187	0.506553	1.70282	3.20936	CNOT6;ORC1;UHRF1;CDC6;WDR13;HSPA1B	Reg_of_cell_proliferation
miR-98-5p	mmu-miR-98-5p	1/15	0.154856	0.506553	6.35875	11.8607	IL6	Reg_of_cell_proliferation
let-7c-5p	mmu-let-7c-5p	1/16	0.164286	0.515131	5.93453	10.7186	MYCN	Reg_of_cell_proliferation
let-7a-5p	mmu-let-7a-5p	1/18	0.182834	0.51902	5.23582	8.89659	IL6	Reg_of_cell_proliferation
let-7e-5p	mmu-let-7e-5p	1/25	0.244582	0.559135	3.70739	5.22077	TLR4	Reg_of_cell_proliferation
miR-27b-3p	mmu-miR-27b-3p	1/30	0.285822	0.594768	3.06741	3.84158	MEF2C	Reg_of_cell_proliferation
miR-16-1-3p	hsa-miR-16-1-3p	2/100	0.306787	0.609026	1.81725	2.14727	CCNE1;TXNIP	Reg_of_cell_proliferation
miR-21a-5p	mmu-miR-21a-5p	1/35	0.324821	0.613098	2.61566	2.94126	PDCD10	Reg_of_cell_proliferation
miR-23b-3p	hsa-miR-23b-3p	4/322	0.48443	0.701238	1.11766	0.810059	CNOT6;HMGB2;TXNIP;ETS1	Reg_of_cell_proliferation
miR-23b-5p	hsa-miR-23b-5p	2/155	0.51759	0.710719	1.16074	0.764428	HPSE;TGFBR2	Reg_of_cell_proliferation
miR-10b-3p	hsa-miR-10b-3p	1/85	0.615222	0.741784	1.05604	0.512993	CCNA2	Reg_of_cell_proliferation
miR-10b-5p	mmu-miR-10b-5p	1/218	0.914374	0.921658	0.406028	0.0363458	SOX7	Reg_of_cell_proliferation
miR-10a-5p	mmu-miR-10a-5p	1/219	0.915339	0.922199	0.404145	0.0357508	SOX7	Reg_of_cell_proliferation
miR-146a-5p	mmu-miR-146a-5p	4/33	9.96933e-05	0.0902654	18.9875	174.94	IL6;RSAD2;STAT1;RELB	Reg_of_cytokine_production
miR-146a-5p	hsa-miR-146a-5p	8/201	0.000128309	0.0902654	5.82058	52.1586	IL6;RSAD2;STAT1;CCL5;IRF7;ISG15;NMI;TLR4	Reg_of_cytokine_production
miR-98-5p	mmu-miR-98-5p	2/15	0.00536134	0.702152	20.9052	109.304	IL6;IFNAR1	Reg_of_cytokine_production
let-7a-5p	mmu-let-7a-5p	2/18	0.00769965	0.702152	16.9829	82.6485	IL6;IFNAR1	Reg_of_cytokine_production
let-7e-5p	mmu-let-7e-5p	2/25	0.014596	0.733448	11.81	49.921	TLR4;IFNAR1	Reg_of_cytokine_production
miR-22-3p	hsa-miR-22-3p	4/163	0.0330888	0.845532	3.44043	11.7269	LGALS9;HMGB1;LBP;HSPA1B	Reg_of_cytokine_production
miR-26b-5p	hsa-miR-26b-5p	21/1872	0.0354776	0.845532	1.60807	5.36912	TIA1;RSAD2;TXK;ACOD1;ARRB1;IGF1;HMGB1;RELB;C3;IFIH1;RNF125;RGCC;GPNMB;CASP3;BCL3;CASP4;CD28;PDE4B;CCL2;HPSE;TLR4	Reg_of_cytokine_production
miR-200b-3p	hsa-miR-200b-3p	4/186	0.0496071	0.845532	3.00214	9.01728	CD274;TBK1;FLT1;TRIM56	Reg_of_cytokine_production
miR-128-3p	mmu-miR-128-3p	2/55	0.0626146	0.845532	5.11734	14.1789	IRF1;CHRNA7	Reg_of_cytokine_production
let-7f-5p	mmu-let-7f-5p	1/11	0.0784727	0.845532	13.498	34.3524	IFNAR1	Reg_of_cytokine_production
let-7c-5p	mmu-let-7c-5p	1/16	0.11209	0.845532	8.99637	19.6882	IFNAR1	Reg_of_cytokine_production
miR-155-5p	mmu-miR-155-5p	2/80	0.1185	0.845532	3.47278	7.40688	CEBPB;IKBKE	Reg_of_cytokine_production
miR-98-5p	hsa-miR-98-5p	9/785	0.128621	0.845532	1.59167	3.26433	C3;IL6;CASP3;HEG1;CCL5;CCL2;ARRB1;IGF1;IFNAR1	Reg_of_cytokine_production
miR-155-5p	hsa-miR-155-5p	10/903	0.13304	0.845532	1.53846	3.10323	IL6;CEBPB;FLT1;STAT1;CASP3;LPL;CCL2;IKBKE;N4BP1;MYD88	Reg_of_cytokine_production
miR-200b-3p	mmu-miR-200b-3p	1/30	0.199875	0.845532	4.65001	7.48681	FLT1	Reg_of_cytokine_production
miR-224-5p	hsa-miR-224-5p	2/132	0.255634	0.845532	2.07819	2.83466	CD40;CASP3	Reg_of_cytokine_production
miR-100-5p	hsa-miR-100-5p	3/250	0.282378	0.845532	1.64219	2.07656	FLT1;HMGB1;PATZ1	Reg_of_cytokine_production
miR-21-5p	hsa-miR-21-5p	6/611	0.299103	0.845532	1.34422	1.62243	CEBPB;CCR7;HMGB1;TLR4;MYD88;TLR3	Reg_of_cytokine_production
miR-23b-5p	hsa-miR-23b-5p	2/155	0.318533	0.845532	1.76372	2.01775	TXK;HPSE	Reg_of_cytokine_production
miR-126-3p	hsa-miR-126-3p	1/58	0.350409	0.845532	2.36245	2.4774	TEK	Reg_of_cytokine_production
let-7a-5p	hsa-let-7a-5p	5/639	0.513331	0.845532	1.05987	0.706758	MAPK11;IL6;DHX9;CASP3;CCR7	Reg_of_cytokine_production
let-7c-5p	hsa-let-7c-5p	4/516	0.533061	0.845532	1.04926	0.660112	IL6;CEBPB;DHX9;CASP3	Reg_of_cytokine_production
miR-10a-5p	hsa-miR-10a-5p	3/463	0.669476	0.848646	0.872204	0.34998	NOD2;AGER;HSPA1B	Reg_of_cytokine_production
miR-9-5p	mmu-miR-9-5p	3/510	0.731688	0.860774	0.789431	0.246619	FLT1;FLT3;FURIN	Reg_of_cytokine_production
miR-9-5p	hsa-miR-9-5p	2/351	0.735983	0.861623	0.765514	0.234667	IL6;ZC3H12A	Reg_of_cytokine_production
miR-128-3p	hsa-miR-128-3p	3/527	0.751819	0.863351	0.763148	0.217695	CASP3;IGF1;LITAF	Reg_of_cytokine_production
miR-10b-5p	mmu-miR-10b-5p	1/218	0.803693	0.885959	0.615537	0.134518	IFNAR1	Reg_of_cytokine_production
miR-10a-5p	mmu-miR-10a-5p	1/219	0.805161	0.885959	0.612682	0.132776	IFNAR1	Reg_of_cytokine_production
let-7e-5p	hsa-let-7e-5p	3/612	0.834987	0.903018	0.653746	0.117896	SPN;IGF1;HMGB1	Reg_of_cytokine_production
miR-23b-3p	hsa-miR-23b-3p	1/322	0.910285	0.939542	0.413906	0.0389062	HMGB2	Reg_of_cytokine_production
miR-10b-5p	hsa-miR-10b-5p	1/322	0.910285	0.939542	0.413906	0.0389062	HSPA1B	Reg_of_cytokine_production
let-7f-5p	hsa-let-7f-5p	1/397	0.949125	0.960817	0.334227	0.0174515	IL6	Reg_of_cytokine_production
miR-27b-3p	hsa-miR-27b-3p	1/421	0.95759	0.965135	0.314739	0.0136394	CYP1B1	Reg_of_cytokine_production
miR-22-3p	hsa-miR-22-3p	3/163	0.00483294	0.465787	9.51827	50.7543	HMGB1;LGALS9;LBP	Reg_of_TNF_superfamily_cytokine_prod_
miR-21-5p	hsa-miR-21-5p	5/611	0.00875862	0.465787	4.3154	20.4452	CCR7;HMGB1;TLR4;TLR3;MYD88	Reg_of_TNF_superfamily_cytokine_prod_
miR-98-5p	mmu-miR-98-5p	1/15	0.0310517	0.465787	34.7456	120.64	IL6	Reg_of_TNF_superfamily_cytokine_prod_
let-7a-5p	mmu-let-7a-5p	1/18	0.0371481	0.465787	28.6098	94.2074	IL6	Reg_of_TNF_superfamily_cytokine_prod_
let-7e-5p	mmu-let-7e-5p	1/25	0.0512278	0.465787	20.2581	60.1965	TLR4	Reg_of_TNF_superfamily_cytokine_prod_
miR-146a-5p	hsa-miR-146a-5p	2/201	0.0665885	0.465787	4.96457	13.4501	IL6;TLR4	Reg_of_TNF_superfamily_cytokine_prod_
miR-146a-5p	mmu-miR-146a-5p	1/33	0.0670729	0.465787	15.1875	41.0363	IL6	Reg_of_TNF_superfamily_cytokine_prod_
miR-26b-5p	hsa-miR-26b-5p	7/1872	0.0930504	0.465787	1.94027	4.60739	IFIH1;GPNMB;BCL3;CCL2;HMGB1;IGF1;TLR4	Reg_of_TNF_superfamily_cytokine_prod_
miR-128-3p	mmu-miR-128-3p	1/55	0.109327	0.465787	8.99006	19.8987	CHRNA7	Reg_of_TNF_superfamily_cytokine_prod_
miR-155-5p	hsa-miR-155-5p	4/903	0.120035	0.465787	2.2316	4.73094	IL6;LPL;CCL2;MYD88	Reg_of_TNF_superfamily_cytokine_prod_
let-7e-5p	hsa-let-7e-5p	3/612	0.136732	0.465787	2.44398	4.86288	SPN;HMGB1;IGF1	Reg_of_TNF_superfamily_cytokine_prod_
let-7a-5p	hsa-let-7a-5p	3/639	0.149909	0.465787	2.33696	4.43492	IL6;DHX9;CCR7	Reg_of_TNF_superfamily_cytokine_prod_
miR-9-5p	hsa-miR-9-5p	2/351	0.167856	0.465787	2.80931	5.01364	IL6;ZC3H12A	Reg_of_TNF_superfamily_cytokine_prod_
miR-98-5p	hsa-miR-98-5p	3/785	0.227238	0.480623	1.88629	2.79502	IL6;CCL2;IGF1	Reg_of_TNF_superfamily_cytokine_prod_
miR-10a-5p	hsa-miR-10a-5p	2/463	0.253894	0.485327	2.11464	2.89883	NOD2;AGER	Reg_of_TNF_superfamily_cytokine_prod_
let-7c-5p	hsa-let-7c-5p	2/516	0.295367	0.493258	1.89144	2.30668	IL6;DHX9	Reg_of_TNF_superfamily_cytokine_prod_
miR-200b-3p	hsa-miR-200b-3p	1/186	0.324858	0.495937	2.60686	2.93107	CD274	Reg_of_TNF_superfamily_cytokine_prod_
miR-100-5p	hsa-miR-100-5p	1/250	0.41072	0.541891	1.93055	1.71789	HMGB1	Reg_of_TNF_superfamily_cytokine_prod_
let-7f-5p	hsa-let-7f-5p	1/397	0.569564	0.648025	1.20485	0.678193	IL6	Reg_of_TNF_superfamily_cytokine_prod_
miR-9-5p	mmu-miR-9-5p	1/510	0.662442	0.704569	0.931956	0.383801	FLT3	Reg_of_TNF_superfamily_cytokine_prod_
miR-128-3p	hsa-miR-128-3p	1/527	0.674602	0.714096	0.901048	0.354682	IGF1	Reg_of_TNF_superfamily_cytokine_prod_
miR-146a-5p	hsa-miR-146a-5p	12/201	2.83101e-09	2.83667e-06	11.6849	229.99	IFITM3;IL6;RSAD2;STAT1;CCL5;MX2;IRF7;IFI44;ISG15;NMI;IFIT1;IFIT3	Response_to_virus
miR-146a-5p	mmu-miR-146a-5p	4/33	4.2662e-05	0.0213737	23.8105	239.586	IL6;RSAD2;STAT1;HES1	Response_to_virus
miR-98-5p	mmu-miR-98-5p	2/15	0.00350404	0.585175	26.1249	147.706	IL6;IFNAR1	Response_to_virus
let-7a-5p	mmu-let-7a-5p	2/18	0.00504676	0.722408	21.2233	112.25	IL6;IFNAR1	Response_to_virus
let-7f-5p	mmu-let-7f-5p	1/11	0.0635524	0.886003	16.8398	46.4087	IFNAR1	Response_to_virus
miR-335-5p	mmu-miR-335-5p	1/13	0.0746693	0.886003	14.0318	36.4081	SAMHD1	Response_to_virus
miR-9-5p	mmu-miR-9-5p	6/510	0.0842039	0.886003	2.0414	5.05148	FLT3;STAT2;STMN1;TRIM25;HES1;POLR3K	Response_to_virus
let-7c-5p	mmu-let-7c-5p	1/16	0.0910998	0.886003	11.2237	26.8898	IFNAR1	Response_to_virus
let-7e-5p	mmu-let-7e-5p	1/25	0.138675	0.886003	7.01165	13.8524	IFNAR1	Response_to_virus
miR-23b-3p	mmu-miR-23b-3p	1/26	0.143807	0.886003	6.73085	13.053	HES1	Response_to_virus
miR-9-5p	hsa-miR-9-5p	4/351	0.157126	0.886003	1.95805	3.62378	IL6;ZC3H12A;STMN1;HES1	Response_to_virus
miR-21-5p	hsa-miR-21-5p	6/611	0.157228	0.886003	1.69174	3.12982	CXCL10;DTX3L;SKP2;PARP9;MYD88;TLR3	Response_to_virus
miR-128-3p	mmu-miR-128-3p	1/55	0.280121	0.886003	3.11158	3.95959	IRF1	Response_to_virus
miR-200b-3p	hsa-miR-200b-3p	2/186	0.303709	0.886003	1.8299	2.18066	TBK1;TRIM56	Response_to_virus
let-7a-5p	hsa-let-7a-5p	5/639	0.33177	0.886003	1.33149	1.46905	MAPK11;IL6;DTX3L;TRIM5;STAT2	Response_to_virus
miR-10b-5p	mmu-miR-10b-5p	2/218	0.373028	0.886003	1.55627	1.53464	PRF1;IFNAR1	Response_to_virus
miR-10a-5p	mmu-miR-10a-5p	2/219	0.375156	0.886003	1.54902	1.51868	PRF1;IFNAR1	Response_to_virus
miR-155-5p	mmu-miR-155-5p	1/80	0.380207	0.886003	2.12422	2.05421	IKBKE	Response_to_virus
let-7f-5p	hsa-let-7f-5p	3/397	0.421593	0.886003	1.27912	1.1048	IL6;DTX3L;STAT2	Response_to_virus
miR-100-5p	hsa-miR-100-5p	2/250	0.439491	0.886003	1.35325	1.11256	ODC1;IFIT3	Response_to_virus
miR-155-5p	hsa-miR-155-5p	6/903	0.450822	0.886003	1.12375	0.895268	MOV10;IL6;STAT1;SAMHD1;IKBKE;MYD88	Response_to_virus
miR-98-5p	hsa-miR-98-5p	5/785	0.502821	0.886003	1.07406	0.738436	IL6;DTX3L;CCL5;STAT2;IFNAR1	Response_to_virus
miR-224-5p	hsa-miR-224-5p	1/132	0.546311	0.886003	1.27766	0.772428	CD40	Response_to_virus
let-7c-5p	hsa-let-7c-5p	3/516	0.596103	0.887482	0.976407	0.505136	IL6;DTX3L;STAT2	Response_to_virus
miR-22-3p	hsa-miR-22-3p	1/163	0.623455	0.887482	1.03154	0.487383	LGALS9	Response_to_virus
miR-26b-5p	hsa-miR-26b-5p	10/1872	0.686172	0.892385	0.887819	0.334376	IFITM3;IFIH1;RSAD2;IFNGR2;BCL3;ACOD1;IFI44;DDX60;GBP2;USP18	Response_to_virus
miR-27b-3p	hsa-miR-27b-3p	2/421	0.717898	0.893718	0.793995	0.263152	BNIP3;ADAR	Response_to_virus
miR-23b-3p	hsa-miR-23b-3p	1/322	0.8559	0.947411	0.516395	0.0803518	ZNFX1	Response_to_virus
let-7e-5p	hsa-let-7e-5p	2/612	0.882942	0.954818	0.540031	0.0672317	DTX3L;STAT2	Response_to_virus
miR-128-3p	hsa-miR-128-3p	1/527	0.958713	0.970318	0.311835	0.0131482	BAX	Response_to_virus
miR-98-5p	hsa-miR-98-5p	15/785	9.07685e-06	0.00280475	4.33306	50.3058	SLC31A1;HEG1;ZFAND5;PDGFB;IGF1;TGFBR1;ZFP36L1;WARS2;C3;FMNL3;PXDN;COL8A1;CCL2;ACKR3;SOX4	Vasculature_dev_
miR-26b-5p	hsa-miR-26b-5p	22/1872	0.00013572	0.0299554	2.71692	24.1939	NUS1;MEF2C;JUN;SLC31A1;ROM1;PDGFB;CXCR4;ADM;IGF1;TSPAN12;RASIP1;LOXL2;C3;CDH5;BMP2;COL4A2;PDCD10;ID1;CCL2;TGFBI;HPSE;E2F7	Vasculature_dev_
miR-126-3p	hsa-miR-126-3p	4/58	0.000210829	0.0321499	15.1546	128.276	EGFL7;CXCR4;ADM;TEK	Vasculature_dev_
miR-9-5p	mmu-miR-9-5p	10/510	0.00025668	0.0321499	4.26352	35.2494	BMP2;FLT1;COL4A2;COL4A1;EPAS1;PXDN;CXCR4;CTNNB1;HES1;TGFBR2	Vasculature_dev_
miR-128-3p	hsa-miR-128-3p	10/527	0.000332944	0.0321499	4.11971	32.9887	CDH5;NUS1;HOXB3;BAX;NR2F2;IGF1;TGFBR1;E2F7;LOXL2;ZFP36L1	Vasculature_dev_
miR-9-5p	hsa-miR-9-5p	8/351	0.000406939	0.0349289	4.90448	38.2885	ZC3H12A;PXDN;CXCR4;HES1;PRDM1;TGFBI;E2F7;TGFBR2	Vasculature_dev_
miR-27b-3p	mmu-miR-27b-3p	3/30	0.000459603	0.0355044	22.5306	173.151	MEF2C;SMAD5;WARS2	Vasculature_dev_
miR-155-5p	hsa-miR-155-5p	13/903	0.000613327	0.0411996	3.15522	23.338	JUN;FLT1;MCAM;SMAD5;FMNL3;SOCS3;COL4A2;PDCD10;S1PR1;CDH13;CCL2;CTNNB1;JUNB	Vasculature_dev_
miR-27b-3p	hsa-miR-27b-3p	8/421	0.00132425	0.0681991	4.05863	26.8962	CDH5;NUS1;CYP1B1;HOXB3;NR2F2;TGFBR1;E2F7;ZFP36L1	Vasculature_dev_
miR-23b-3p	mmu-miR-23b-3p	2/26	0.00758324	0.154159	16.7298	81.6718	HES1;SMAD5	Vasculature_dev_
miR-100-5p	hsa-miR-100-5p	5/250	0.00878514	0.161073	4.17815	19.7822	FLT1;COL4A1;ID1;ACKR3;SAT1	Vasculature_dev_
miR-200b-3p	mmu-miR-200b-3p	2/30	0.0100179	0.173905	14.3369	65.9985	JUN;FLT1	Vasculature_dev_
miR-206-3p	mmu-miR-206-3p	2/34	0.0127518	0.185128	12.5423	54.7106	PDCD10;ID1	Vasculature_dev_
miR-21a-5p	mmu-miR-21a-5p	2/35	0.0134805	0.185128	12.1616	52.3741	PDCD10;TGFBI	Vasculature_dev_
let-7f-5p	hsa-let-7f-5p	6/397	0.0153983	0.185128	3.15111	13.1512	FMNL3;SOCS3;PDGFB;COL8A1;PRDM1;TGFBR1	Vasculature_dev_
let-7c-5p	hsa-let-7c-5p	7/516	0.0156951	0.185128	2.83681	11.7853	FMNL3;MEF2C;ID1;PDGFB;COL8A1;TGFBR1;RHOB	Vasculature_dev_
miR-224-5p	hsa-miR-224-5p	3/132	0.0293178	0.258597	4.6915	16.5589	HOXB3;CXCR4;APLN	Vasculature_dev_
miR-10a-5p	hsa-miR-10a-5p	6/463	0.0299659	0.258597	2.68691	9.42485	MMP14;RNF213;COL4A2;ZFAND5;HOXB3;E2F7	Vasculature_dev_
miR-21-5p	hsa-miR-21-5p	7/611	0.0351595	0.282111	2.37891	7.96426	MEF2C;COL4A1;SLC31A1;TGFBI;APOLD1;TGFBR2;RHOB	Vasculature_dev_
miR-23b-5p	hsa-miR-23b-5p	3/155	0.0438791	0.301303	3.97697	12.4333	GJC1;HPSE;TGFBR2	Vasculature_dev_
miR-224-5p	mmu-miR-224-5p	1/15	0.0731544	0.368155	14.2036	37.1449	WARS2	Vasculature_dev_
miR-26b-5p	mmu-miR-26b-5p	1/20	0.0963415	0.395871	10.4632	24.4823	NUS1	Vasculature_dev_
miR-146a-5p	mmu-miR-146a-5p	1/33	0.153975	0.467709	6.20844	11.6158	HES1	Vasculature_dev_
let-7e-5p	hsa-let-7e-5p	5/612	0.197291	0.526047	1.65534	2.68674	FMNL3;ZFAND5;PDGFB;COL8A1;IGF1	Vasculature_dev_
let-7a-5p	hsa-let-7a-5p	5/639	0.221547	0.528895	1.58263	2.38521	FMNL3;PDGFB;COL8A1;PRDM1;ZFP36L1	Vasculature_dev_
miR-200b-3p	hsa-miR-200b-3p	2/186	0.241751	0.534494	2.16458	3.07337	JUN;FLT1	Vasculature_dev_
miR-128-3p	mmu-miR-128-3p	1/55	0.243332	0.534494	3.675	5.19398	WARS2	Vasculature_dev_
miR-146a-5p	hsa-miR-146a-5p	2/201	0.269806	0.542069	1.9999	2.61997	CFH;CXCR4	Vasculature_dev_
miR-155-5p	mmu-miR-155-5p	1/80	0.333574	0.56202	2.50886	2.75445	S1PR1	Vasculature_dev_
miR-22-3p	hsa-miR-22-3p	1/163	0.563341	0.677324	1.21833	0.699165	MMP14	Vasculature_dev_
miR-10b-5p	hsa-miR-10b-5p	1/322	0.806692	0.832558	0.609907	0.131016	HOXB3	Vasculature_dev_

## Sheet: S9. Primers
Supplemental Table S9. Primers used for qRT-PCR and genotyping.
Gene	qRT-PCR Primer Sequence
Dgcr8	GCAGGAGAAGCGATGATGGAG
Dgcr8	CCGTAGAAGTTGAATGGGTCG
Dicer1	CTGTTTTGCACGTACCCTGA
Dicer1	GAAGCCAATTCACAGGAGGA
Gapdh	TTGATGGCAACAATCTCCAC
Gapdh	CGTCCCGTAGACAAAATGGT
pre-miR-126	TGACAGCACATTATTACTTTTGGT
pre-miR-126	TGACCGCGCATTATTACTCACG
pre-miR-146	AGCTCTGAGAACTGAATTCCATGG
pre-miR-146	AGCTGAAGAACTGAATTTCACAGG
pre-let-7a	TTCACTGTGGGATGAGGTAGTAGG
pre-let-7a	ATCACCTTAGGAAAGACAGTAGATT
Tarbp2	GGCTCCGGCACTACTACAG
Tarbp2	TGGTCCCATACTCCTGAAGAAG
Gene	Genotyping Primer Sequence
Dgcr8	CTGGAGTAGGAATGTTGATTTC
Dgcr8	CCTGATTCACTTACAACACAACC
Cre	AGGTTCGTTCACTCATGGA
Cre	TCGACCAGTTTAGTTACCC
Hdac4	CTTGTTGAGAACAAACTCCTGCAGCT
Hdac4	ATCTGCCCACCAGAGTATGTG
miRNA	Qiagen GeneGlobe ID
miR-103a-3p	YP00204063
miR-497-5p	YP00204354
miR-126-3p	YP00204227
miR-146-5p	YP02119752
let-7a-5p	YP00205727
U6 snRNA	YP00203907

## Sheet: S10. Cell Line STR Profiles
Supplemental Table S10. Cell line STR Profiles. STR profiles of genomic DNA.
Mouse Cell Line STR
Marker Name	ADC106	SVR
MCA-4-2	19.3	20.3
MCA-5-5	17	17
MCA-6-4	18	18
MCA-6-7	15, 17	16, 17
MCA-9-2	18	18
MCA-12-1	17	17
MCA-15-3	22.3, 23.3	22.3
MCA-18-3	16, 18	16
Human Cell Line STR
Marker Name	KU-CAS3	KU-CAS5
D3S1358	15, 17	16
TH01	6, 7	7, 9
D21S11	29	30, 33.2
D18S51	15, 16	18, 19
Penta E	5, 12	19, 20
D5S818	13	9, 10
D13S317	8, 10	10, 12
D7S820	8, 9	11
D16S539	12, 13	10, 11
CSF1PO	12	9, 11
Penta D	12, 13	9, 13
vWA	14, 18	16, 17
D8S1179	9, 13	13, 14
TPOX	9, 11	11
FGA	23, 26	23, 24
AMEL	X, Y	X
Mouse	Not Detected	Not Detected

[truncated: 1 more sheets: S11. Antibody List IHC]
